# Supplementary material for: Development of an accurate breast cancer detection classifier based on platelet RNA
Source: Research Square preprint supplement (doi:10.21203/rs.3.rs-4152659/v1), 2024-04-10

Supplementary Figure 2. Violin plot showing the ten markers expression levels in all platelet samples.

a

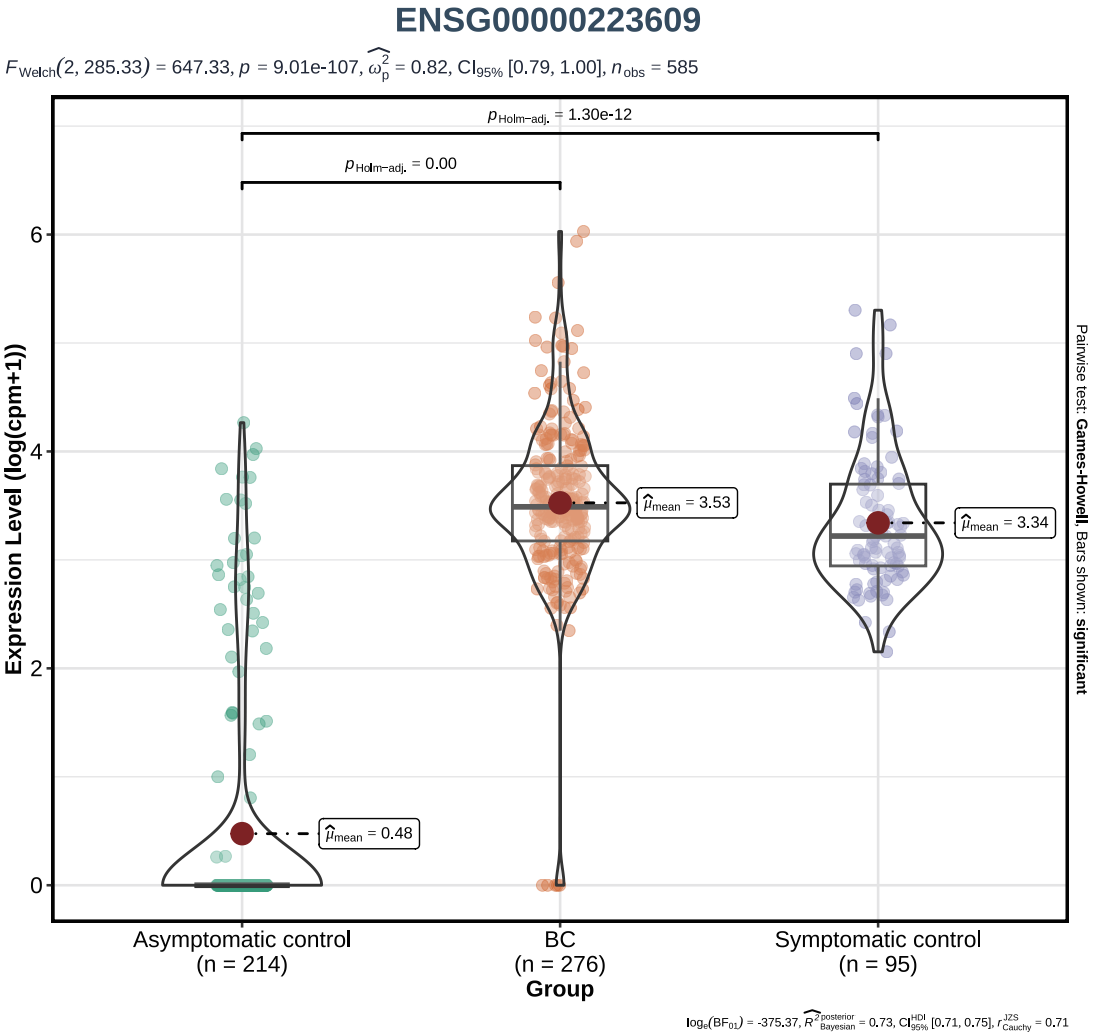

b

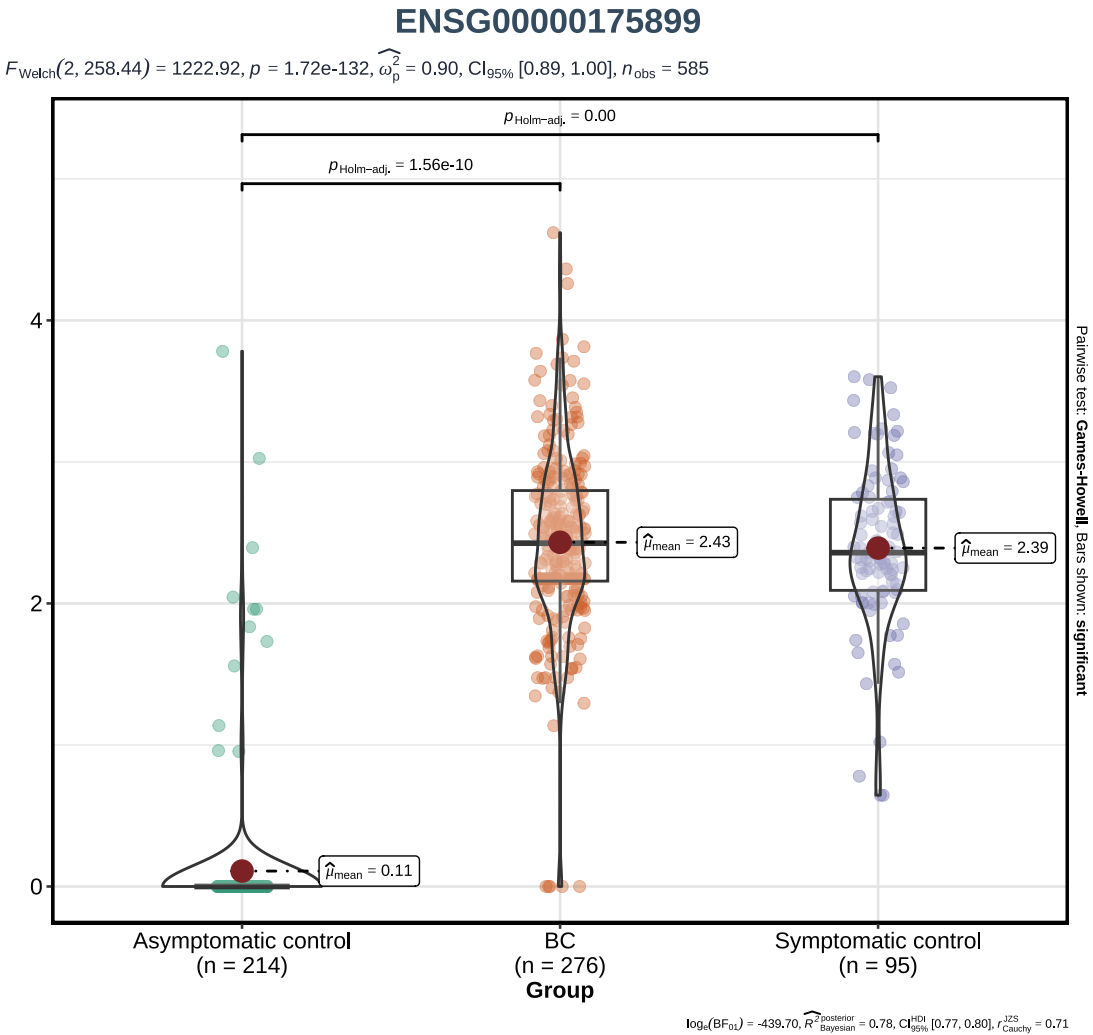

c

ENSG00000158578

 $F_{\text{Welch}}(2, 291.54) = 1168.41, p = 6.17\text{e-}140, \hat{\omega}_p^2 = 0.89, \text{CI}_{95\%} [0.87, 1.00], n_{\text{obs}} = 585$ 
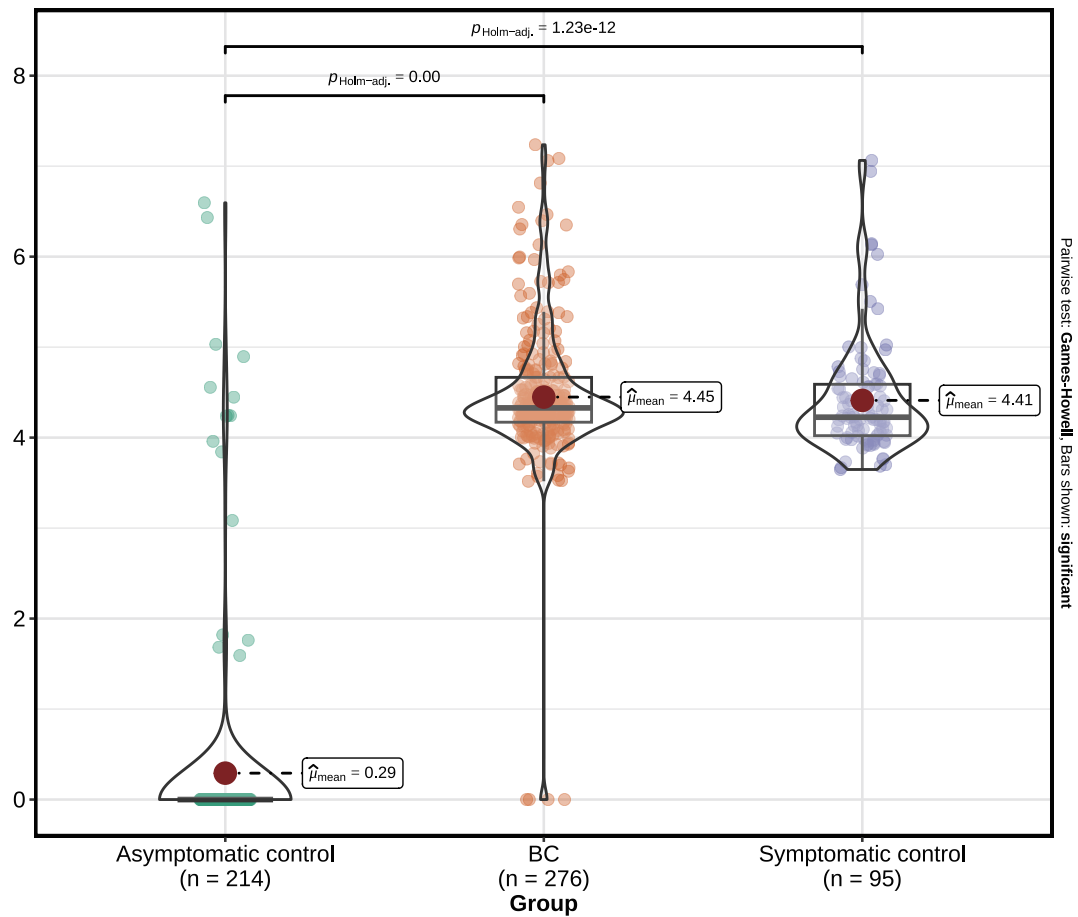

d

ENSG00000154262

 $F_{\text{Welch}}(2, 246.05) = 406.76, p = 9.77\text{e-}79, \hat{\omega}_p^2 = 0.77, \text{CI}_{95\%} [0.73, 1.00], n_{\text{obs}} = 585$ 
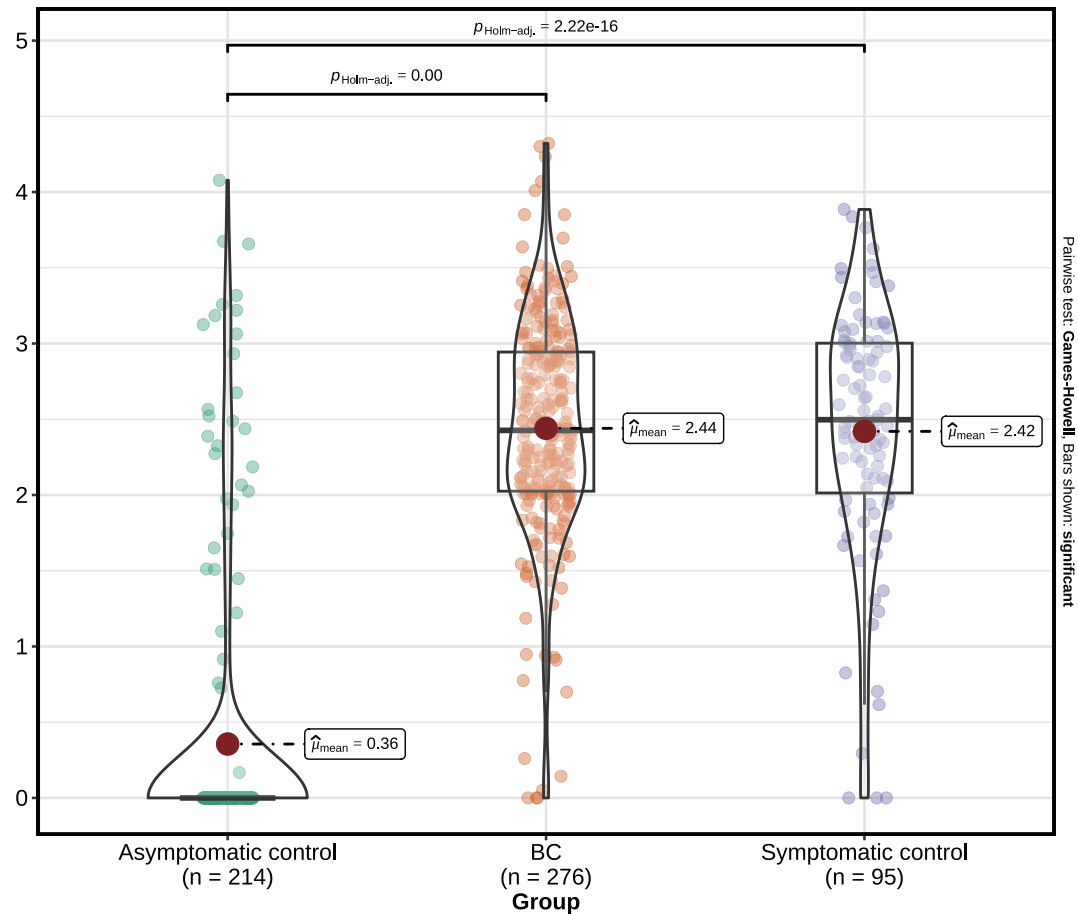

e

## ENSG00000239839

 $F_{\text{Welch}}(2, 330.95) = 373.89, p = 1.22\text{e-}85, \hat{\omega}_p^2 = 0.69, \text{CI}_{95\%} [0.65, 1.00], n_{\text{obs}} = 585$ 
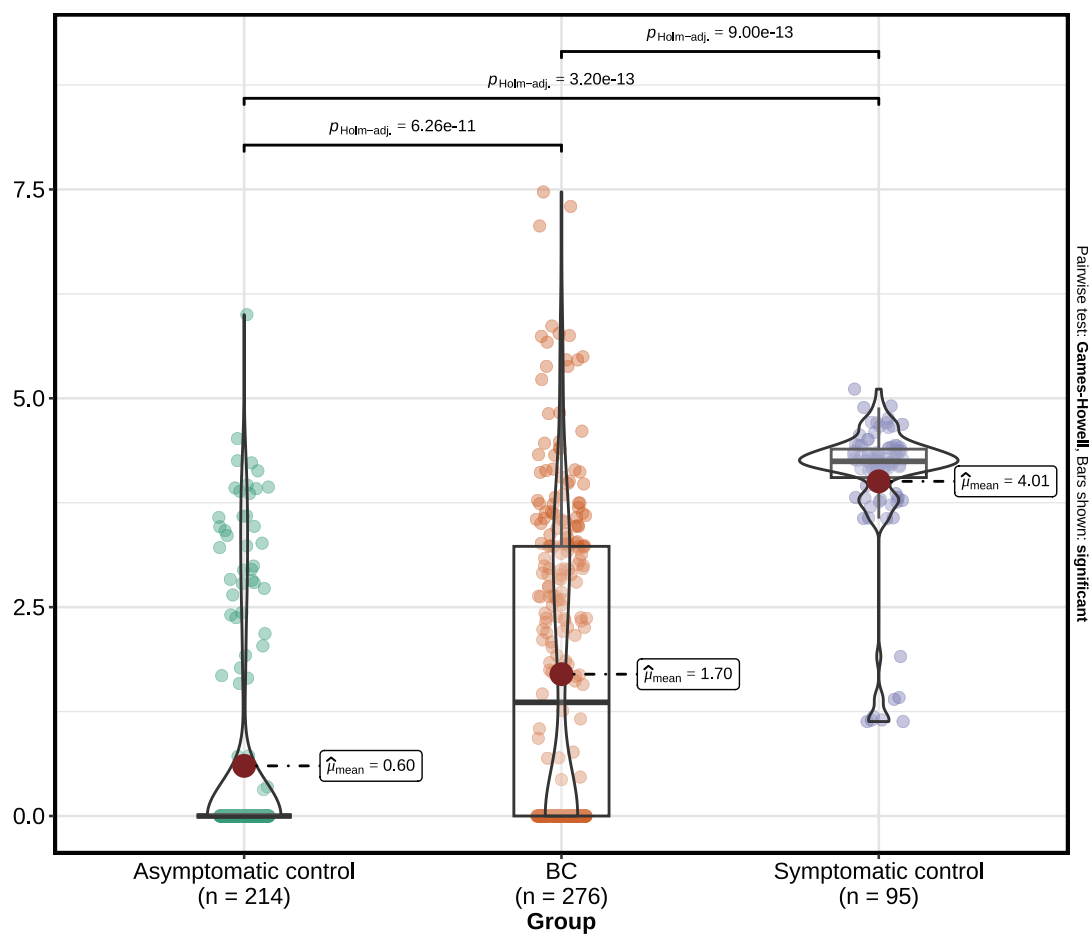
 $\log_e(\text{BF}_{01}) = -122.24, \hat{R}_{\text{Bayesian}}^2 = 0.35, \text{CI}_{95\%}^{\text{HDI}} [0.30, 0.40], r_{\text{Cauchy}}^{\text{JZS}} = 0.71$ 

f

## ENSG00000159496

 $F_{\text{Welch}}(2, 329.66) = 48.59, p = 3.20\text{e-}19, \hat{\omega}_p^2 = 0.22, \text{CI}_{95\%} [0.16, 1.00], n_{\text{obs}} = 585$ 
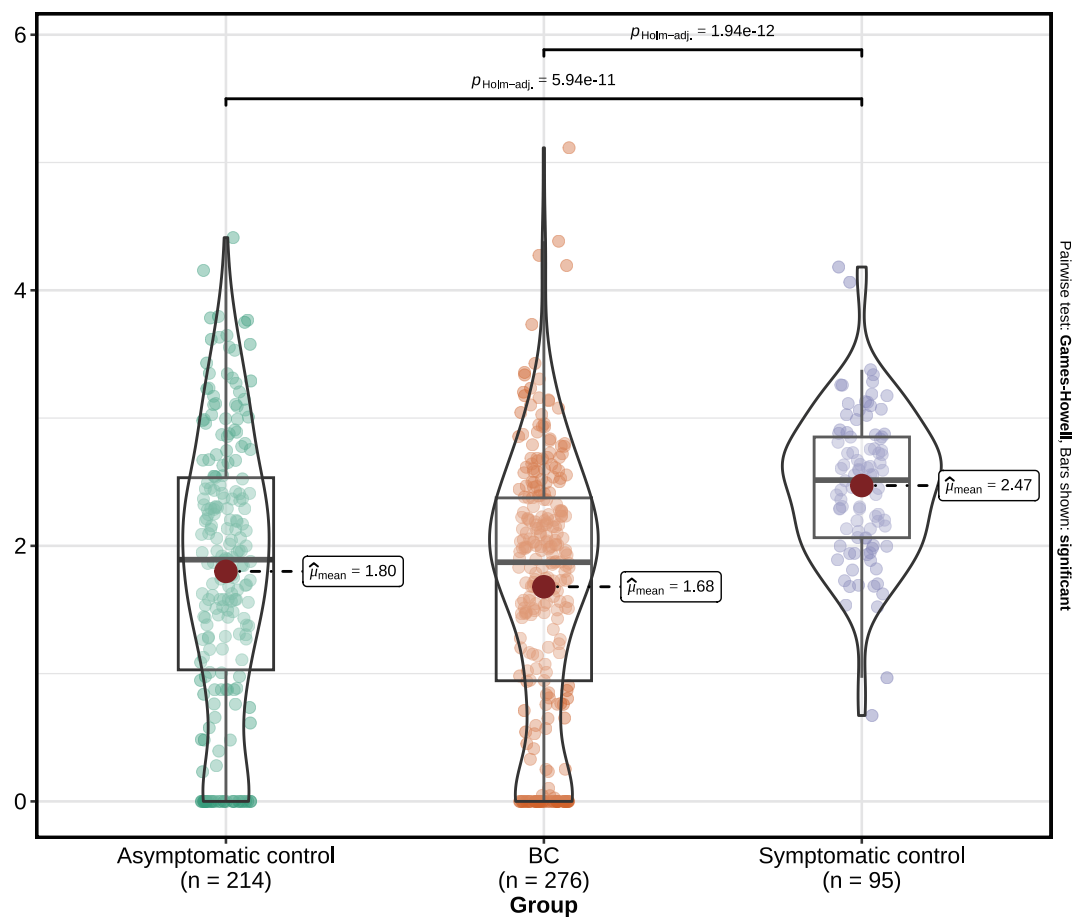
 $\log_e(\text{BF}_{01}) = -17.08, \hat{R}_{\text{Bayesian}}^2 = 0.07, \text{CI}_{95\%}^{\text{HDI}} [0.04, 0.11], r_{\text{Cauchy}}^{\text{JZS}} = 0.71$

g

## ENSG00000198763

 $F_{\text{Welch}}(2, 187.55) = 7.78, p = 5.69\text{e-}04, \hat{\omega}_p^2 = 0.07, \text{CI}_{95\%} [0.02, 1.00], n_{\text{obs}} = 585$ 
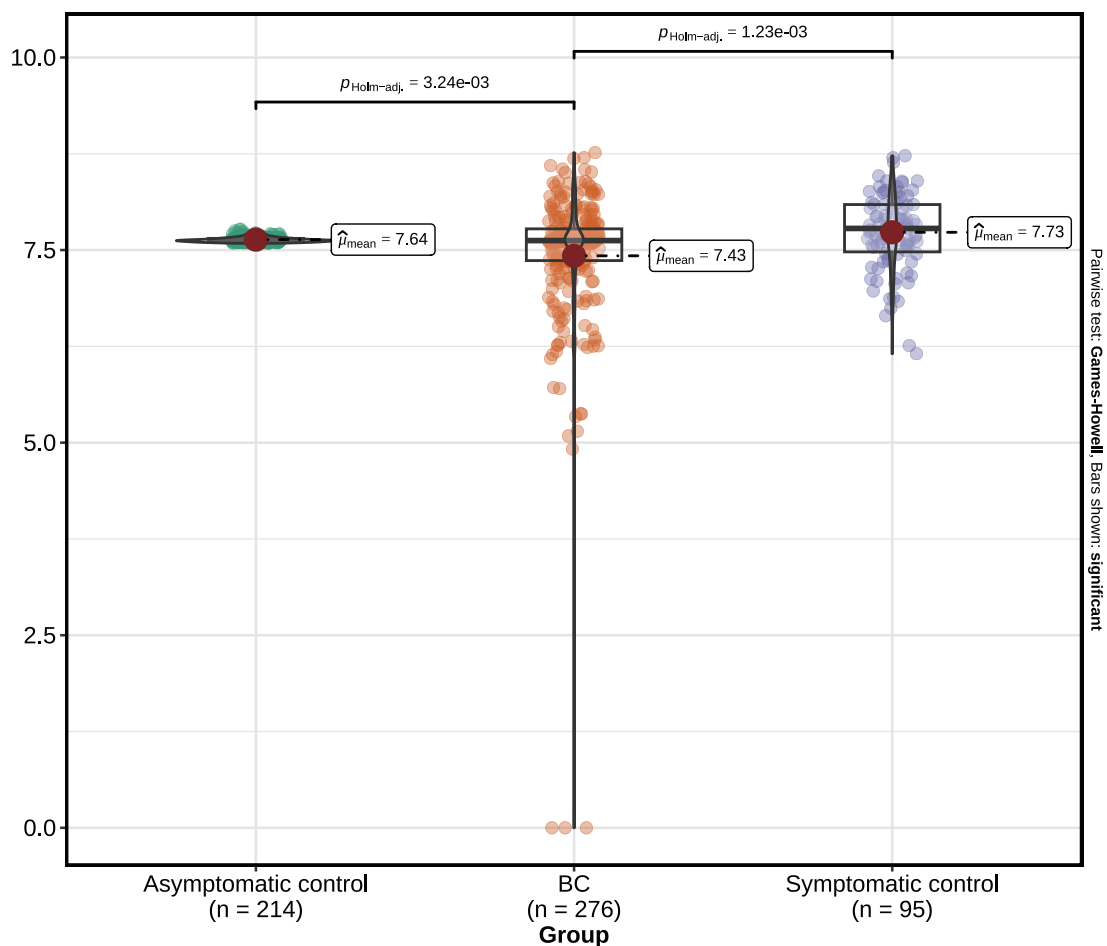
 $\log_e(\text{BF}_{01}) = -3.90, \hat{R}_{\text{Bayesian}}^2 = 0.03, \text{CI}_{95\%}^{\text{HDI}} [6.24\text{e-}03, 0.06], r_{\text{Cauchy}}^{\text{JZS}} = 0.71$ 

h

## ENSG00000198727

 $F_{\text{Welch}}(2, 187.02) = 61.56, p = 2.87\text{e-}21, \hat{\omega}_p^2 = 0.39, \text{CI}_{95\%} [0.30, 1.00], n_{\text{obs}} = 585$ 
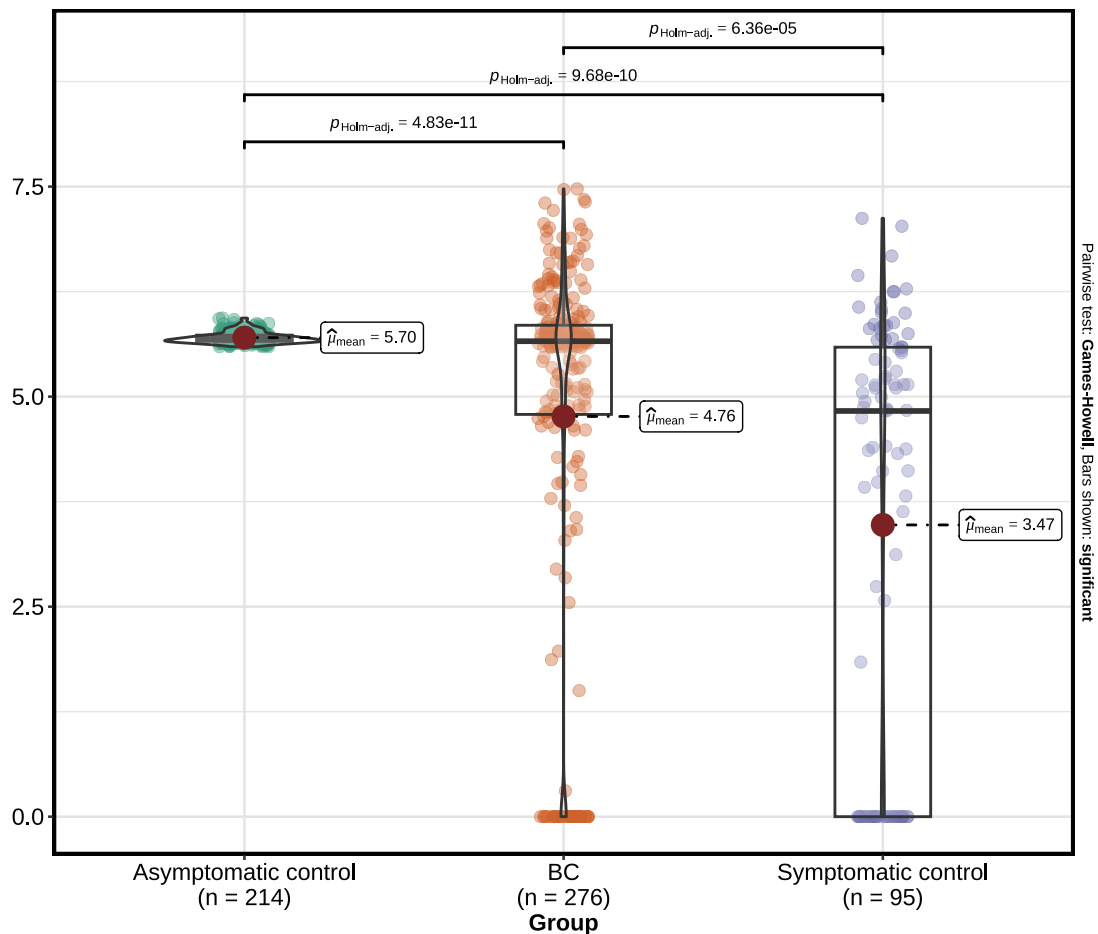
 $\log_e(\text{BF}_{01}) = -41.70, \hat{R}_{\text{Bayesian}}^2 = 0.15, \text{CI}_{95\%}^{\text{HDI}} [0.10, 0.20], r_{\text{Cauchy}}^{\text{JZS}} = 0.71$



i

## ENSG00000151789

 $F_{\text{Welch}}(2, 267.29) = 4.85, p = 8.52\text{e-}03, \hat{\omega}_p^2 = 0.03, \text{CI}_{95\%} [2.06\text{e-}03, 1.00], n_{\text{obs}} = 585$ 
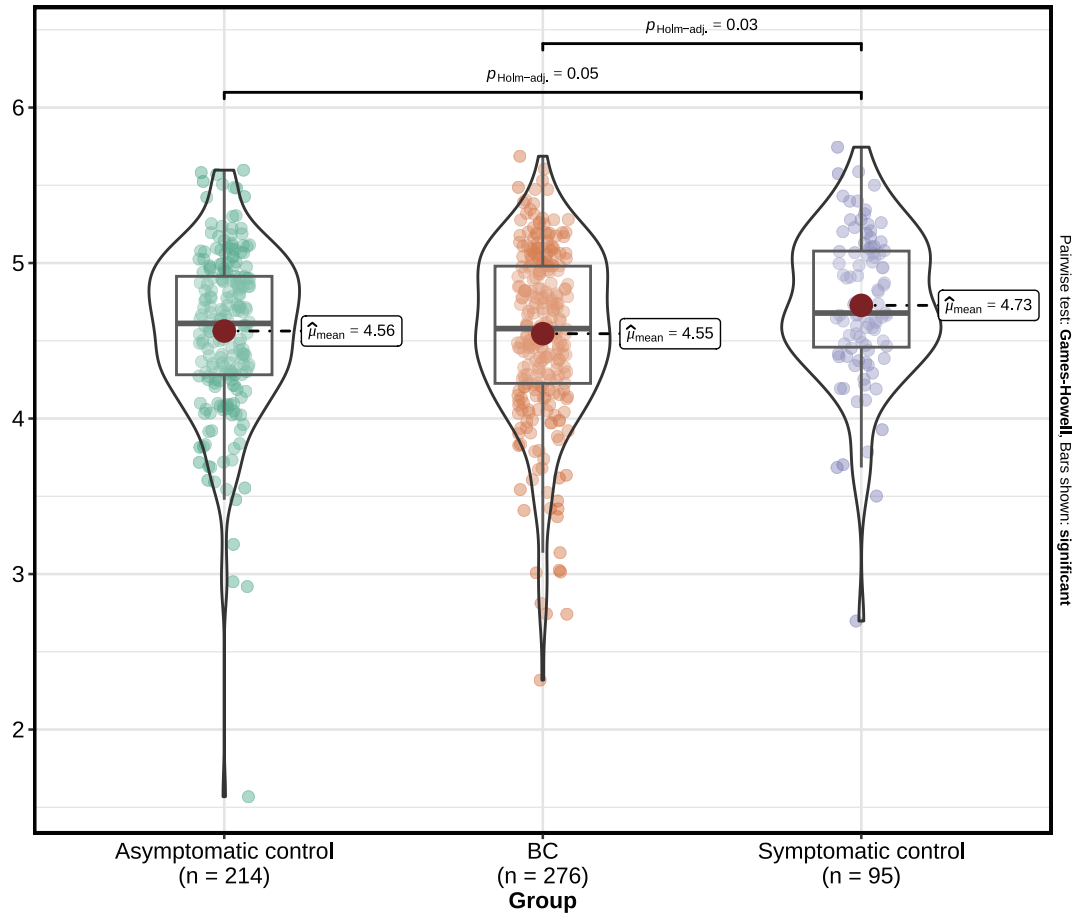

j

## ENSG00000131462

 $F_{\text{Welch}}(2, 261.03) = 107.46, p = 8.95\text{e-}35, \hat{\omega}_p^2 = 0.45, \text{CI}_{95\%} [0.37, 1.00], n_{\text{obs}} = 585$ 
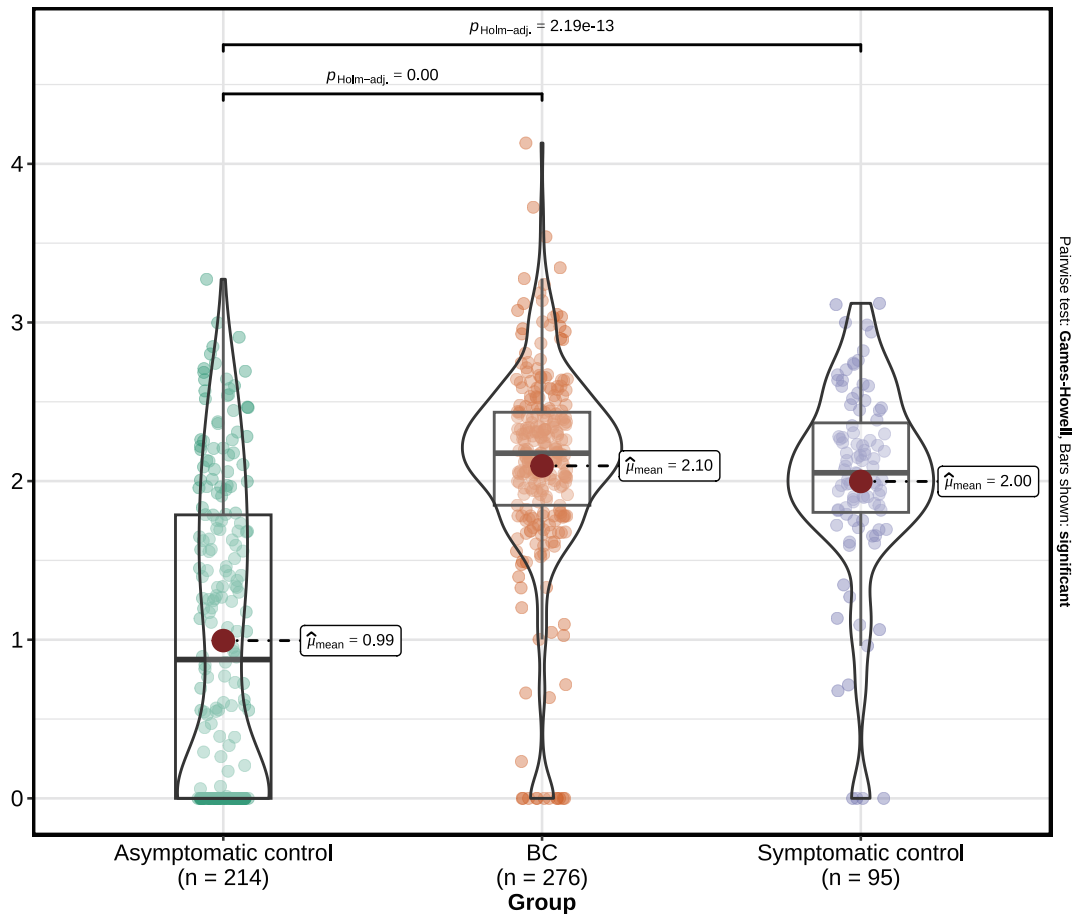

Supplement: Supplementary file 1 [file b41404f79705a957edb523b5.pdf]
