# Supplementary material for: Development of an accurate breast cancer detection classifier based on platelet RNA
Source: Research Square preprint supplement (doi:10.21203/rs.3.rs-4152659/v1), 2024-04-10
Supplement: Supplementary file 1 [file 0619011b27ed279914b794f5.xlsx]

## Sheet: BCvsNon-BC
Supplementary Table 2. The diagnostic power of each single differentially gene in breast cancer.
Ensembl_gene_id	Hgnc_symbol	Coding_gene_size	Gene_length	Coefficient	Pvalue	Padjust	AUC
ENSG00000223609	HBD	protein_coding	10980	-1.43509	4.78602e-13	4.78602e-13	0.868201
ENSG00000175899	A2M	protein_coding	48566	-1.65161	1.44082e-18	1.44082e-18	0.850367
ENSG00000158578	ALAS2	protein_coding	21923	-1.01478	8.73964e-14	8.73964e-14	0.839003
ENSG00000154262	ABCA6	protein_coding	63194	-1.1047	1.64654e-17	1.64654e-17	0.805854
ENSG00000124356	STAMBP	protein_coding	44744	-1.55062	1.48433e-12	1.48433e-12	0.797243
ENSG00000256263	DDX11L8	unprocessed_pseudogene	1192	-0.976052	1.67897e-18	1.67897e-18	0.794913
ENSG00000130024	PHF10	protein_coding	21665	1.19852	4.97253e-13	4.97253e-13	0.781715
ENSG00000110395	CBL	protein_coding	107629	-1.14199	3.56701e-13	3.56701e-13	0.774092
ENSG00000131462	TUBG1	protein_coding	5598	-1.22239	2.15643e-12	2.15643e-12	0.766163
ENSG00000114805	PLCH1	protein_coding	369492	-1.22439	6.47802e-11	6.47802e-11	0.761999
ENSG00000089289	IGBP1	protein_coding	32878	1.97673	3.71114e-11	3.71114e-11	0.755317
ENSG00000125772	GPCPD1	protein_coding	66568	1.54948	3.76321e-10	3.76321e-10	0.754376
ENSG00000101193	GID8	protein_coding	10329	-1.6827	6.71039e-11	6.71039e-11	0.753953
ENSG00000133106	EPSTI1	protein_coding	105884	1.15096	1.12536e-09	1.12536e-09	0.753741
ENSG00000168785	TSPAN5	protein_coding	188245	1.11172	9.2526e-11	9.2526e-11	0.752776
ENSG00000130511	SSBP4	protein_coding	15699	1.37087	3.70124e-10	3.70124e-10	0.747977
ENSG00000204406	MBD5	protein_coding	495961	1.88598	9.82669e-10	9.82669e-10	0.741813
ENSG00000126709	IFI6	protein_coding	6149	0.809102	1.08555e-08	1.08555e-08	0.72939
ENSG00000114030	KPNA1	protein_coding	93044	1.28353	1.16754e-08	1.16754e-08	0.720544
ENSG00000167978	SRRM2	protein_coding	19913	1.38456	6.03909e-10	6.03909e-10	0.719085
ENSG00000116857	TMEM9	protein_coding	36803	-1.46289	1.8396e-08	1.8396e-08	0.711086
ENSG00000142676	RPL11	protein_coding	5094	0.220118	3.70658e-05	3.70658e-05	0.707228
ENSG00000147454	SLC25A37	protein_coding	46508	-0.875025	3.89968e-11	3.89968e-11	0.700969
ENSG00000168461	RAB31	protein_coding	154277	1.60298	1.9505e-07	1.9505e-07	0.694429
ENSG00000115896	PLCL1	protein_coding	767989	1.05095	5.04415e-08	5.04415e-08	0.689723
ENSG00000167657	DAPK3	protein_coding	12671	0.751012	5.66901e-08	5.66901e-08	0.686571
ENSG00000250535	STK19B	unprocessed_pseudogene	518	-0.956339	2.29732e-08	2.29732e-08	0.683277
ENSG00000204642	HLA-F	protein_coding	15754	0.525708	6.29472e-05	6.29472e-05	0.682524
ENSG00000131711	MAP1B	protein_coding	102332	0.670177	7.79561e-08	7.79561e-08	0.682218
ENSG00000214413	BBIP1	protein_coding	20472	-1.03848	8.25724e-08	8.25724e-08	0.681795
ENSG00000196505	GDAP2	protein_coding	66137	0.716866	3.07475e-08	3.07475e-08	0.679183
ENSG00000122223	CD244	protein_coding	32728	0.667098	1.99236e-08	1.99236e-08	0.678807
ENSG00000166035	LIPC	protein_coding	159276	0.952218	1.39672e-06	1.39672e-06	0.677019
ENSG00000225439	BOLA3-AS1	lncRNA	3946	1.19651	1.61651e-06	1.61651e-06	0.674854
ENSG00000125166	GOT2	protein_coding	27212	0.83478	9.11747e-08	9.11747e-08	0.674807
ENSG00000197142	ACSL5	protein_coding	54264	0.586788	1.66034e-07	1.66034e-07	0.668902
ENSG00000104267	CA2	protein_coding	17526	1.09456	2.11564e-06	2.11564e-06	0.667043
ENSG00000198836	OPA1	protein_coding	104668	1.47439	7.82975e-06	7.82975e-06	0.661067
ENSG00000047634	SCML1	protein_coding	17540	0.885955	2.49829e-06	2.49829e-06	0.659491
ENSG00000198830	HMGN2	protein_coding	4203	1.18447	5.11857e-07	5.11857e-07	0.658526
ENSG00000187554	TLR5	protein_coding	33845	1.15798	3.80524e-06	3.80524e-06	0.656644
ENSG00000285774	NA	lncRNA	3179	0.927888	5.95778e-05	5.95778e-05	0.653986
ENSG00000145349	CAMK2D	protein_coding	343874	0.669094	3.09517e-06	3.09517e-06	0.652974
ENSG00000249898	MCPH1-AS1	lncRNA	90915	1.71323	3.23317e-06	3.23317e-06	0.650762
ENSG00000168904	LRRC28	protein_coding	139368	1.69699	5.56058e-06	5.56058e-06	0.650198
ENSG00000137449	CPEB2	protein_coding	67673	0.581895	2.47627e-06	2.47627e-06	0.649068
ENSG00000100697	DICER1	protein_coding	71783	0.564743	3.20323e-06	3.20323e-06	0.645445
ENSG00000103544	VPS35L	protein_coding	151554	0.604736	3.8418e-05	3.8418e-05	0.643516
ENSG00000164754	RAD21	protein_coding	28843	0.725343	3.01847e-05	3.01847e-05	0.643492
ENSG00000106477	CEP41	protein_coding	48663	-0.773784	0.000106536	0.000106536	0.642904
ENSG00000266412	NCOA4	protein_coding	25536	-0.929894	0.00160017	0.00160017	0.641163
ENSG00000159496	RGL4	protein_coding	11041	0.450283	0.000163814	0.000163814	0.634058
ENSG00000243317	STMP1	protein_coding	30923	1.88805	1.64256e-05	1.64256e-05	0.631893
ENSG00000119326	CTNNAL1	protein_coding	70954	1.15382	0.000177823	0.000177823	0.63147
ENSG00000213551	DNAJC9	protein_coding	63894	-1.22611	8.01753e-05	8.01753e-05	0.629117
ENSG00000168116	KIAA1586	protein_coding	8708	-0.780046	3.56941e-05	3.56941e-05	0.623165
ENSG00000012223	LTF	protein_coding	49590	-0.223879	0.00144771	0.00144771	0.609025

## Sheet: BCvsSymptomatic control
ensembl_gene_id	hgnc_symbol	coding_gene_size	Gene_length	Coefficient	Pvalue	Padjust	AUC
ENSG00000239839	DEFA3	protein_coding	2429	0.942483	1.14435e-08	1.14435e-08	0.866944
ENSG00000159496	RGL4	protein_coding	11041	1.08548	9.95977e-06	9.95977e-06	0.748535
ENSG00000223609	HBD	protein_coding	10980	-0.823803	0.00611	0.00611	0.680697
ENSG00000198763	MT-ND2	protein_coding	1042	1.1291	0.00287321	0.00287321	0.679772
ENSG00000198727	MT-CYB	protein_coding	1141	-0.241171	0.000343591	0.000343591	0.669288
ENSG00000151789	ZNF385D	protein_coding	961104	1.14173	0.00182536	0.00182536	0.668363
ENSG00000131462	TUBG1	protein_coding	5598	-0.52295	0.0269363	0.0269363	0.653253
ENSG00000243317	STMP1	protein_coding	30923	1.85961	0.00147083	0.00147083	0.646932
ENSG00000143226	FCGR2A	protein_coding	18584	-0.702646	0.0040536	0.0040536	0.645082
ENSG00000198830	HMGN2	protein_coding	4203	0.972579	0.00267131	0.00267131	0.640919
ENSG00000078589	P2RY10	protein_coding	18396	0.853937	0.00418136	0.00418136	0.638452
ENSG00000248309	MEF2C-AS1	lncRNA	583071	1.21528	0.00383427	0.00383427	0.637681
ENSG00000170043	TRAPPC1	protein_coding	1779	-1.90008	0.012809	0.012809	0.631977
ENSG00000282828	NA	lncRNA	31739	0.753203	0.00702084	0.00702084	0.631514
ENSG00000156265	MAP3K7CL	protein_coding	98419	1.1964	0.00205561	0.00205561	0.63136
ENSG00000250535	STK19B	unprocessed_pseudogene	518	-0.89084	0.00333314	0.00333314	0.630281
ENSG00000234684	SDCBP2-AS1	lncRNA	53331	0.969434	0.00817769	0.00817769	0.625964
ENSG00000127252	PLAAT1	protein_coding	36611	1.53917	0.00542986	0.00542986	0.625193
ENSG00000113658	SMAD5	protein_coding	55903	0.46792	0.0135041	0.0135041	0.623343
ENSG00000244459	NA	lncRNA	6192	1.1033	0.013375	0.013375	0.62288
ENSG00000121749	TBC1D15	protein_coding	87542	1.08976	0.017806	0.017806	0.621955
ENSG00000175161	CADM2	protein_coding	1115441	0.496691	0.0238156	0.0238156	0.621878
ENSG00000170323	FABP4	protein_coding	4818	-0.490052	0.00664929	0.00664929	0.620644
ENSG00000231246	LINC02884	lncRNA	183392	0.730574	0.02407	0.02407	0.620413
ENSG00000104267	CA2	protein_coding	17526	0.721101	0.0200682	0.0200682	0.615634
ENSG00000120727	PAIP2	protein_coding	28134	1.64192	0.0164581	0.0164581	0.614246
ENSG00000121775	TMEM39B	protein_coding	30836	-0.793199	0.0112998	0.0112998	0.610237
ENSG00000270240	NA	lncRNA	16897	-0.62016	0.00543442	0.00543442	0.609775
ENSG00000128524	ATP6V1F	protein_coding	2992	-1.26384	0.0114239	0.0114239	0.609467
ENSG00000266412	NCOA4	protein_coding	25536	-0.431965	0.181943	0.181943	0.609467
ENSG00000086506	HBQ1	protein_coding	721	-0.506489	0.0136117	0.0136117	0.604687
ENSG00000150991	UBC	protein_coding	5765	-1.18418	0.0172401	0.0172401	0.601449
ENSG00000140682	TGFB1I1	protein_coding	6376	-0.811405	0.0397966	0.0397966	0.599137
ENSG00000185201	IFITM2	protein_coding	5743	-0.503415	0.0349414	0.0349414	0.598982
ENSG00000187446	CHP1	protein_coding	51049	-0.314465	0.112058	0.112058	0.593895
ENSG00000170473	PYM1	protein_coding	31206	0.886973	0.0252561	0.0252561	0.59189
ENSG00000110665	C11orf21	protein_coding	7422	-0.653459	0.10074	0.10074	0.591582
ENSG00000197779	ZNF81	protein_coding	165660	-0.548784	0.0328942	0.0328942	0.591505
ENSG00000226777	FAM30A	lncRNA	14664	-0.707374	0.044936	0.044936	0.578323
ENSG00000175899	A2M	protein_coding	48566	-0.590108	0.0559165	0.0559165	0.56568
ENSG00000153283	CD96	protein_coding	373032	-0.175408	0.478291	0.478291	0.540086
ENSG00000134265	NAPG	protein_coding	26860	-0.420169	0.21159	0.21159	0.437249
