# Supplementary material for: Development of an accurate breast cancer detection classifier based on platelet RNA
Source: Research Square preprint supplement (doi:10.21203/rs.3.rs-4152659/v1), 2024-04-10
Supplement: Supplementary file 2 [file 513550393220dab582ab5062.docx]

**Supplementary methods**

**Total RNA extraction and RNA-sequencing library preparation**

Whole blood was drawn into 10-mL ethylenediaminetetraacetic acid-coated vacutainer tubes. All blood samples were processed within 48 h. Platelets were isolated from whole blood following the two-step differential centrifugation protocol using a standard tabletop centrifuge. The blood tube was inverted 4–6 times before centrifugation. The tubes were then centrifuged at 120 g for 20 min at RT. The obtained PRP was placed into a separate 15-mL tube. The PRP was centrifuged at 360 g for 20 min at RT. The supernatant was removed by pipetting without disturbing the platelet pellet and discarded, followed by resuspending the platelet pellet in 750μL of trizol. The platelet pellet was then transferred to a 1.5-mL Eppendorf tube and stored at −80 ℃. Total RNA was extracted using the RNeasy Mini kit (Qiagen, SAS, France) following the manufacturer’s indications. RNA concentration and integrity were evaluated using Nanodrop (ThermoFisher Scientific; Illkirch, France) and Agilent 2100 bioanalyzer (Agilent Technologies, Santa Clara, CA, USA), respectively. All RNA samples were stored at −80 ℃ until library preparation.

RNA-Seq library construction used cDNA amplification via SMART-SeqII combined with a transposase-based library construction technique. Less than 4 μl of RNA sample was taken. Oligo-dT primer was added to a sample and then the sample was placed on a PCR instrument for RNA denaturation. The reaction system was configured for reverse transcription. First-strand cDNA was synthesized with SMART-SeqII. The reaction system was configured for PCR amplification to process cDNA preamplification.

The Agilent 2100 bioanalyzer instrument (Agilent High Sensitivity DNA Reagents) was used to determine the quality of the cDNAs. Qualified amplified cDNAs used a transposon-based method for further library construction. Single-stranded PCR products were generated via denaturation. The reaction system and program for circularization were subsequently configured and set up. Single-stranded cyclized products were produced, while uncyclized linear DNA molecules were digested. Single-stranded circle DNA molecules were replicated via rolling cycle amplification, and a DNA nanoball (DNB) containing multiple DNA copies was generated. Sufficient quality DNBs were then loaded into patterned nanoarrays using a high-intensity DNA nanochip technique and sequenced through combinatorial probe-anchor synthesis (cPAS). The library was sequenced PE100 on the BGISEQ platform (BGI-Shenzhen, China). The sequencing runs were designed to produce 4 gigabases (Gb) per sample. The raw reads were filtered after sequencing. Data filtering included removing adaptor sequences, contamination, and low-quality reads from raw reads.
