# Supplementary material for: Development of an accurate breast cancer detection classifier based on platelet RNA
Source: Research Square preprint supplement (doi:10.21203/rs.3.rs-4152659/v1), 2024-04-10
Supplement: Supplementary file 3 [file c34221d7bc951e1ed900ce65.xlsx]

## Sheet: sampleinfo
Supplementary Table 3.Clinicopathological information for each participants (n=587).
ID	Group	Stage	Age	HER2+/HER2-	TNBC/Non-TNBC	HR+/HR-	LuminalA/B	Subtype	isTraing.series	isValidation.series	isTest.series	transcriptsDetected	pathological diagnosis
XMFH-9	BRCA	II	51	HER2+	Non-TNBC	HR-	NA	HER2+	0	1	0	5070	invasive ductal carcinoma
XMFH-83	symptomatic control	control	37	NA	NA	NA	NA	NA	0	0	1	5059	fibroadenomas
XMFH-82	symptomatic control	control	38	NA	NA	NA	NA	NA	0	1	0	5072	sclerosing adenosis
XMFH-81	BRCA	I	57	HER2-	TNBC	HR-	NA	NA	1	0	0	5041	invasive ductal carcinoma
XMFH-80	symptomatic control	control	34	NA	NA	NA	NA	NA	0	0	1	5044	fibroadenomas
XMFH-79	symptomatic control	control	53	NA	NA	NA	NA	NA	1	0	0	5076	sclerosing adenosis
XMFH-78	symptomatic control	control	39	NA	NA	NA	NA	NA	0	0	1	5054	sclerosing adenosis
XMFH-76	BRCA	II	55	HER2-	Non-TNBC	HR+	LuminalB	LuminalB(HER2-)	1	0	0	5079	invasive ductal carcinoma
XMFH-75	BRCA	II	52	HER2-	Non-TNBC	HR+	LuminalB	LuminalB(HER2-)	1	0	0	5073	invasive ductal carcinoma
XMFH-74	BRCA	II	73	HER2+	Non-TNBC	HR+	LuminalB	LuminalB(HER2+)	1	0	0	5081	invasive ductal carcinoma
XMFH-73	BRCA	II	29	HER2-	TNBC	HR-	NA	NA	1	0	0	5069	invasive ductal carcinoma
XMFH-72	BRCA	IV	48	HER2-	Non-TNBC	HR+	LuminalB	LuminalB(HER2-)	1	0	0	5017	invasive ductal carcinoma
XMFH-71	BRCA	II	51	NA	Non-TNBC	HR+	NA	NA	1	0	0	5049	invasive ductal carcinoma
XMFH-70	BRCA	II	46	HER2-	Non-TNBC	HR+	LuminalA	LuminalA	0	0	1	4974	invasive ductal carcinoma
XMFH-7	BRCA	I	31	NA	Non-TNBC	HR+	NA	NA	1	0	0	5082	papilloma
XMFH-69	BRCA	III	53	NA	Non-TNBC	HR+	NA	NA	1	0	0	4927	invasive ductal carcinoma
XMFH-68	symptomatic control	control	38	NA	NA	NA	NA	NA	0	1	0	4995	plasma cell mastitis
XMFH-67	symptomatic control	control	34	NA	NA	NA	NA	NA	0	0	1	4973	myofibroblastoma
XMFH-66	symptomatic control	control	18	NA	NA	NA	NA	NA	1	0	0	5034	benign tumor
XMFH-65	BRCA	II	50	HER2-	Non-TNBC	HR+	LuminalB	LuminalB(HER2-)	0	1	0	5050	invasive ductal carcinoma
XMFH-64	BRCA	III	68	HER2+	Non-TNBC	HR+	LuminalB	LuminalB(HER2+)	1	0	0	4937	invasive ductal carcinoma
XMFH-63	symptomatic control	control	46	NA	NA	NA	NA	NA	1	0	0	5094	benign tumor
XMFH-62	symptomatic control	control	32	NA	NA	NA	NA	NA	1	0	0	5085	benign tumor
XMFH-61	symptomatic control	control	37	NA	NA	NA	NA	NA	1	0	0	5069	mastitis
XMFH-60	BRCA	0	51	HER2-	Non-TNBC	HR+	LuminalB	LuminalB(HER2-)	0	0	1	5078	intraductal carcinoma
XMFH-6	symptomatic control	control	29	NA	NA	NA	NA	NA	1	0	0	5081	granulomatous lobular mastitis
XMFH-59	symptomatic control	control	34	NA	NA	NA	NA	NA	1	0	0	5089	plasma cell mastitis
XMFH-58	BRCA	IV	70	HER2-	Non-TNBC	HR+	LuminalB	LuminalB(HER2-)	0	1	0	5086	invasive ductal carcinoma
XMFH-57	symptomatic control	control	35	NA	NA	NA	NA	NA	0	0	1	5089	fibroadenomas
XMFH-52	BRCA	II	46	HER2-	Non-TNBC	HR+	LuminalB	LuminalB(HER2-)	0	0	1	5004	invasive ductal carcinoma
XMFH-501	BRCA	III	47	HER2-	Non-TNBC	HR+	LuminalB	LuminalB(HER2-)	0	0	1	5063	invasive ductal carcinoma
XMFH-500	symptomatic control	control	57	NA	NA	NA	NA	NA	1	0	0	5057	fibroadenomas
XMFH-499	BRCA	IV	59	NA	NA	NA	NA	NA	1	0	0	5059	invasive ductal carcinoma
XMFH-497	BRCA	II	45	HER2-	TNBC	HR-	NA	NA	1	0	0	5049	invasive ductal carcinoma
XMFH-496	BRCA	I	51	HER2-	TNBC	HR-	NA	NA	1	0	0	5073	invasive ductal carcinoma
XMFH-495	BRCA	II	45	HER2+	Non-TNBC	HR-	NA	HER2+	1	0	0	5068	invasive ductal carcinoma
XMFH-494	symptomatic control	control	44	NA	NA	NA	NA	NA	1	0	0	5077	sclerosing adenosis
XMFH-493	symptomatic control	control	35	NA	NA	NA	NA	NA	1	0	0	5057	fibroadenomas
XMFH-489	symptomatic control	control	46	NA	NA	NA	NA	NA	1	0	0	5061	fibroadenomas
XMFH-488	symptomatic control	control	39	NA	NA	NA	NA	NA	0	1	0	5074	plasma cell mastitis
XMFH-487	symptomatic control	control	39	NA	NA	NA	NA	NA	0	1	0	5070	mastitis
XMFH-486	BRCA	II	54	HER2-	TNBC	HR-	NA	NA	0	0	1	5084	invasive ductal carcinoma
XMFH-477	BRCA	0	58	HER2-	Non-TNBC	HR+	LuminalA	LuminalA	1	0	0	5076	ductal carcinoma in situ
XMFH-476	BRCA	III	48	HER2+	Non-TNBC	HR-	NA	HER2+	0	1	0	5080	invasive ductal carcinoma
XMFH-475	symptomatic control	control	35	NA	NA	NA	NA	NA	1	0	0	5053	fibroadenomas
XMFH-474	symptomatic control	control	45	NA	NA	NA	NA	NA	1	0	0	5078	sclerosing adenosis
XMFH-473	BRCA	II	50	HER2-	Non-TNBC	HR+	LuminalB	LuminalB(HER2-)	1	0	0	5069	invasive ductal carcinoma
XMFH-472	symptomatic control	control	34	NA	NA	NA	NA	NA	1	0	0	5081	granulomatous lobular mastitis
XMFH-471	BRCA	0	40	HER2+	Non-TNBC	HR-	NA	HER2+	1	0	0	5059	ductal carcinoma in situ
XMFH-470	symptomatic control	control	49	NA	NA	NA	NA	NA	1	0	0	5073	fibroadenomas
XMFH-469	BRCA	III	58	HER2+	Non-TNBC	HR-	NA	HER2+	0	0	1	5076	invasive ductal carcinoma
XMFH-468	symptomatic control	control	46	NA	NA	NA	NA	NA	1	0	0	5066	fibroadenomas
XMFH-465	symptomatic control	control	39	NA	NA	NA	NA	NA	0	1	0	5074	benign tumor
XMFH-464	BRCA	I	45	HER2-	Non-TNBC	HR+	LuminalB	LuminalB(HER2-)	0	0	1	5062	invasive ductal carcinoma
XMFH-462	symptomatic control	control	31	NA	NA	NA	NA	NA	1	0	0	5076	fibroadenomas
XMFH-461	symptomatic control	control	49	NA	NA	NA	NA	NA	0	0	1	5075	granulomatous mastitis
XMFH-460	symptomatic control	control	48	NA	NA	NA	NA	NA	0	1	0	5076	sclerosing adenosis
XMFH-458	BRCA	II	24	HER2-	Non-TNBC	HR+	LuminalB	LuminalB(HER2-)	0	1	0	5076	invasive ductal carcinoma
XMFH-457	BRCA	I	39	HER2-	Non-TNBC	HR+	LuminalB	LuminalB(HER2-)	1	0	0	5050	invasive ductal carcinoma
XMFH-456	symptomatic control	control	43	NA	NA	NA	NA	NA	1	0	0	5070	sclerosing adenosis
XMFH-455	BRCA	II	38	HER2-	Non-TNBC	HR+	LuminalB	LuminalB(HER2-)	0	1	0	5042	invasive ductal carcinoma
XMFH-454	BRCA	II	43	HER2-	Non-TNBC	HR+	LuminalB	LuminalB(HER2-)	1	0	0	5067	invasive ductal carcinoma
XMFH-453	BRCA	II	58	HER2+	Non-TNBC	HR-	NA	HER2+	1	0	0	5080	invasive ductal carcinoma
XMFH-451	BRCA	II	58	HER2-	TNBC	HR-	NA	NA	0	0	1	5089	invasive ductal carcinoma
XMFH-448	BRCA	0	36	HER2-	Non-TNBC	HR+	LuminalA	LuminalA	1	0	0	5080	intraductal carcinoma
XMFH-447	BRCA	III	47	HER2-	NA	NA	NA	NA	1	0	0	5098	invasive ductal carcinoma
XMFH-446	symptomatic control	control	58	NA	NA	NA	NA	NA	1	0	0	5053	sclerosing adenosis
XMFH-445	BRCA	I	65	HER2+	Non-TNBC	HR+	LuminalB	LuminalB(HER2+)	1	0	0	5068	invasive ductal carcinoma
XMFH-444	BRCA	II	53	HER2-	Non-TNBC	HR+	LuminalA	LuminalA	0	0	1	5045	invasive ductal carcinoma
XMFH-443	symptomatic control	control	47	NA	NA	NA	NA	NA	0	0	1	5085	sclerosing adenosis
XMFH-440	BRCA	II	55	HER2-	Non-TNBC	HR+	LuminalB	LuminalB(HER2-)	1	0	0	5090	invasive ductal carcinoma
XMFH-439	symptomatic control	control	45	NA	NA	NA	NA	NA	0	0	1	5061	sclerosing adenosis
XMFH-432	BRCA	II	49	NA	NA	HR-	NA	NA	0	0	1	5071	invasive ductal carcinoma
XMFH-430	symptomatic control	control	42	NA	NA	NA	NA	NA	0	0	1	5063	sclerosing adenosis
XMFH-429	BRCA	0	53	HER2-	TNBC	HR-	NA	NA	1	0	0	5052	ductal carcinoma in situ
XMFH-427	BRCA	II	32	HER2+	Non-TNBC	HR-	NA	HER2+	0	0	1	5063	invasive ductal carcinoma
XMFH-426	BRCA	I	51	HER2+	Non-TNBC	HR+	LuminalB	LuminalB(HER2+)	0	1	0	5080	invasive carcinoma
XMFH-420	symptomatic control	control	28	NA	NA	NA	NA	NA	1	0	0	5081	granulomatous mastitis
XMFH-419	symptomatic control	control	28	NA	NA	NA	NA	NA	0	0	1	5052	sclerosing adenosis
XMFH-418	BRCA	II	48	HER2-	Non-TNBC	HR+	LuminalB	LuminalB(HER2-)	0	1	0	5071	invasive ductal carcinoma
XMFH-411	BRCA	II	58	HER2-	Non-TNBC	HR+	LuminalB	LuminalB(HER2-)	1	0	0	5081	invasive ductal carcinoma
XMFH-410	BRCA	I	60	HER2-	Non-TNBC	HR+	LuminalA	LuminalA	0	0	1	5040	Solid papillary carcinoma
XMFH-409	symptomatic control	control	64	NA	NA	NA	NA	NA	0	1	0	5093	fibroadenomas
XMFH-408	symptomatic control	control	40	NA	NA	NA	NA	NA	0	0	1	5088	sclerosing adenosis
XMFH-407	symptomatic control	control	31	NA	NA	NA	NA	NA	1	0	0	5080	fibroepithelial tumor
XMFH-406	symptomatic control	control	42	NA	NA	NA	NA	NA	0	1	0	5060	sclerosing adenosis
XMFH-405	BRCA	II	45	HER2+	Non-TNBC	HR+	LuminalB	LuminalB(HER2+)	1	0	0	5083	invasive ductal carcinoma
XMFH-404	BRCA	I	26	HER2+	Non-TNBC	HR+	LuminalB	LuminalB(HER2+)	1	0	0	5081	invasive ductal carcinoma
XMFH-403	BRCA	0	38	HER2-	Non-TNBC	HR+	LuminalA	LuminalA	1	0	0	5073	ductal carcinoma in situ
XMFH-402	symptomatic control	control	43	NA	NA	NA	NA	NA	0	0	1	5052	granulomatous mastitis
XMFH-401	BRCA	II	49	HER2-	Non-TNBC	HR+	LuminalB	LuminalB(HER2-)	0	0	1	5079	invasive ductal carcinoma
XMFH-400	BRCA	II	32	NA	Non-TNBC	HR+	NA	NA	0	1	0	5085	intraductal carcinoma
XMFH-40	BRCA	0	44	HER2+	Non-TNBC	HR-	NA	HER2+	0	0	1	4910	invasive ductal carcinoma
XMFH-399	BRCA	II	51	HER2-	Non-TNBC	HR+	LuminalA	LuminalA	0	0	1	5071	invasive ductal carcinoma
XMFH-398	BRCA	II	45	HER2-	Non-TNBC	HR+	LuminalB	LuminalB(HER2-)	0	0	1	5067	invasive lobular carcinoma
XMFH-397	BRCA	I	68	NA	Non-TNBC	HR+	NA	NA	0	0	1	5091	invasive lobular carcinoma
XMFH-396	BRCA	II	37	HER2-	TNBC	HR-	NA	NA	1	0	0	5077	invasive ductal carcinoma
XMFH-395	BRCA	II	51	HER2-	Non-TNBC	HR+	LuminalA	LuminalA	1	0	0	5083	encapsulated papillary carcinoma
XMFH-394	BRCA	I	27	HER2-	Non-TNBC	HR+	LuminalB	LuminalB(HER2-)	1	0	0	5050	ductal carcinoma in situ
XMFH-393	BRCA	na	61	HER2-	Non-TNBC	HR+	LuminalB	LuminalB(HER2-)	0	1	0	5068	metaplastic carcinoma
XMFH-392	BRCA	II	38	HER2-	Non-TNBC	HR+	LuminalB	LuminalB(HER2-)	0	0	1	5073	invasive ductal carcinoma
XMFH-391	symptomatic control	control	46	NA	NA	NA	NA	NA	1	0	0	5080	breast lipoma
XMFH-390	symptomatic control	control	52	NA	NA	NA	NA	NA	1	0	0	5078	sclerosing adenosis
XMFH-39	BRCA	0	45	NA	NA	NA	NA	NA	1	0	0	5047	intraductal carcinoma
XMFH-389	BRCA	II	47	HER2+	Non-TNBC	HR-	NA	HER2+	0	0	1	5084	invasive ductal carcinoma
XMFH-388	BRCA	III	54	HER2-	Non-TNBC	HR+	LuminalB	LuminalB(HER2-)	0	0	1	5060	invasive ductal carcinoma
XMFH-386	BRCA	II	62	HER2+	Non-TNBC	HR+	LuminalB	LuminalB(HER2+)	0	1	0	5087	invasive ductal carcinoma
XMFH-385	BRCA	na	42	HER2+	Non-TNBC	HR+	LuminalB	LuminalB(HER2+)	0	1	0	5076	invasive ductal carcinoma
XMFH-384	BRCA	II	63	HER2-	Non-TNBC	HR+	LuminalB	LuminalB(HER2-)	1	0	0	5074	invasive ductal carcinoma
XMFH-383	BRCA	II	42	HER2-	TNBC	HR-	NA	NA	0	1	0	5074	NA
XMFH-380	BRCA	II	28	HER2-	Non-TNBC	HR+	LuminalB	LuminalB(HER2-)	1	0	0	5071	invasive ductal carcinoma
XMFH-38	BRCA	I	61	HER2+	Non-TNBC	HR-	NA	HER2+	1	0	0	5061	invasive ductal carcinoma
XMFH-377	BRCA	II	48	HER2+	Non-TNBC	HR-	NA	HER2+	1	0	0	5074	invasive ductal carcinoma
XMFH-376	symptomatic control	control	41	NA	NA	NA	NA	NA	0	1	0	5061	fibroadenomas
XMFH-375	BRCA	I	46	HER2+	Non-TNBC	HR-	NA	HER2+	0	0	1	5089	invasive ductal carcinoma
XMFH-374	symptomatic control	control	51	NA	NA	NA	NA	NA	0	1	0	5075	sclerosing adenosis
XMFH-373	BRCA	II	43	HER2-	TNBC	HR-	NA	NA	0	0	1	5069	invasive ductal carcinoma
XMFH-372	BRCA	II	62	HER2+	Non-TNBC	HR-	NA	HER2+	1	0	0	5048	invasive ductal carcinoma
XMFH-371	BRCA	na	64	NA	Non-TNBC	HR+	NA	NA	0	1	0	5048	intraductal papillary carcinoma
XMFH-370	BRCA	II	52	NA	Non-TNBC	HR+	NA	NA	0	0	1	5075	intraductal carcinoma
XMFH-369	BRCA	na	59	HER2-	Non-TNBC	HR+	LuminalB	LuminalB(HER2-)	1	0	0	5076	invasive ductal carcinoma
XMFH-368	BRCA	I	58	NA	NA	HR-	NA	NA	1	0	0	5075	invasive ductal carcinoma
XMFH-366	BRCA	na	37	HER2+	Non-TNBC	HR-	NA	HER2+	1	0	0	5083	invasive ductal carcinoma
XMFH-365	BRCA	II	53	HER2+	Non-TNBC	HR+	LuminalB	LuminalB(HER2+)	0	1	0	5084	invasive ductal carcinoma
XMFH-363	BRCA	I	43	HER2-	Non-TNBC	HR+	LuminalB	LuminalB(HER2-)	0	1	0	5075	invasive ductal carcinoma
XMFH-362	BRCA	II	43	HER2+	Non-TNBC	HR+	LuminalB	LuminalB(HER2+)	0	0	1	5077	invasive ductal carcinoma
XMFH-361	symptomatic control	control	47	NA	NA	NA	NA	NA	1	0	0	5067	mastitis
XMFH-360	symptomatic control	control	51	NA	NA	NA	NA	NA	0	1	0	5081	fibroadenomas
XMFH-359	BRCA	II	41	HER2-	TNBC	HR-	NA	NA	0	1	0	5062	invasive ductal carcinoma
XMFH-358	symptomatic control	control	43	NA	NA	NA	NA	NA	1	0	0	5071	sclerosing adenosis
XMFH-356	symptomatic control	control	50	NA	NA	NA	NA	NA	1	0	0	5067	sclerosing adenosis
XMFH-355	BRCA	na	57	HER2-	Non-TNBC	HR+	LuminalB	LuminalB(HER2-)	0	0	1	5007	invasive ductal carcinoma
XMFH-353	symptomatic control	control	45	NA	NA	NA	NA	NA	0	1	0	5045	plasma cell mastitis
XMFH-35	BRCA	III	65	HER2-	TNBC	HR-	NA	NA	0	0	1	5052	invasive lobular carcinoma
XMFH-349	symptomatic control	control	41	NA	NA	NA	NA	NA	0	1	0	5041	granulomatous lobular mastitis
XMFH-348	BRCA	0	44	NA	NA	NA	NA	NA	1	0	0	5077	invasive lobular carcinoma
XMFH-347	symptomatic control	control	55	NA	NA	NA	NA	NA	0	0	1	5082	fibroadenomas
XMFH-346	symptomatic control	control	44	NA	NA	NA	NA	NA	0	0	1	5072	fibroadenomas
XMFH-345	symptomatic control	control	41	NA	NA	NA	NA	NA	1	0	0	5067	plasma cell mastitis
XMFH-344	BRCA	I	53	HER2-	Non-TNBC	HR+	LuminalB	LuminalB(HER2-)	1	0	0	5081	invasive ductal carcinoma
XMFH-343	symptomatic control	control	35	NA	NA	NA	NA	NA	0	1	0	5064	granulomatous lobular mastitis
XMFH-342	BRCA	I	51	HER2-	Non-TNBC	HR+	LuminalB	LuminalB(HER2-)	0	0	1	5076	invasive ductal carcinoma
XMFH-341	BRCA	I	41	HER2-	Non-TNBC	HR+	LuminalA	LuminalA	0	0	1	5086	invasive lobular carcinoma
XMFH-340	symptomatic control	control	56	NA	NA	NA	NA	NA	1	0	0	5077	mastitis
XMFH-338	BRCA	II	41	HER2-	Non-TNBC	HR+	LuminalB	LuminalB(HER2-)	1	0	0	5078	invasive ductal carcinoma
XMFH-336	BRCA	I	49	NA	NA	NA	NA	NA	1	0	0	5080	invasive ductal carcinoma
XMFH-334	BRCA	I	55	NA	NA	NA	NA	NA	0	0	1	5080	invasive ductal carcinoma
XMFH-333	symptomatic control	control	30	NA	NA	NA	NA	NA	0	1	0	5077	benign tumor
XMFH-332	BRCA	I	44	NA	Non-TNBC	HR+	LuminalB	LuminalB	1	0	0	5055	invasive ductal carcinoma
XMFH-331	BRCA	II	45	HER2+	Non-TNBC	HR-	NA	HER2+	0	0	1	5070	metaplastic carcinoma
XMFH-330	symptomatic control	control	52	NA	NA	NA	NA	NA	0	0	1	5084	benign follicular tumor
XMFH-33	symptomatic control	control	33	NA	NA	NA	NA	NA	1	0	0	5065	sclerosing adenosis
XMFH-326	BRCA	II	38	HER2-	Non-TNBC	HR+	LuminalA	LuminalA	1	0	0	5057	invasive ductal carcinoma
XMFH-325	BRCA	II	67	HER2-	Non-TNBC	HR+	LuminalA	LuminalA	1	0	0	5079	invasive ductal carcinoma
XMFH-324	BRCA	II	62	NA	Non-TNBC	HR+	LuminalB	LuminalB	1	0	0	5071	invasive ductal carcinoma
XMFH-323	symptomatic control	control	32	NA	NA	NA	NA	NA	1	0	0	5076	sclerosing adenosis
XMFH-321	symptomatic control	control	48	NA	NA	NA	NA	NA	1	0	0	5076	plasm cell mastitis
XMFH-320	BRCA	II	51	HER2+	Non-TNBC	HR+	LuminalB	LuminalB(HER2+)	1	0	0	5067	invasive ductal carcinoma
XMFH-32	symptomatic control	control	33	NA	NA	NA	NA	NA	0	0	1	5048	sclerosing adenosis
XMFH-319	BRCA	II	53	HER2+	Non-TNBC	HR-	NA	HER2+	1	0	0	5032	invasive carcinoma
XMFH-318	symptomatic control	control	47	NA	NA	NA	NA	NA	0	0	1	5065	sclerosing adenosis
XMFH-317	symptomatic control	control	49	NA	NA	NA	NA	NA	0	1	0	5078	sclerosing adenosis
XMFH-316	BRCA	IV	75	HER2+	Non-TNBC	HR+	LuminalB	LuminalB(HER2+)	1	0	0	5068	invasive carcinoma
XMFH-315	BRCA	IV	49	HER2+	Non-TNBC	HR+	LuminalB	LuminalB(HER2+)	1	0	0	5072	invasive ductal carcinoma
XMFH-314	BRCA	III	31	HER2+	Non-TNBC	HR-	NA	HER2+	1	0	0	5086	invasive ductal carcinoma
XMFH-313	BRCA	II	47	NA	Non-TNBC	HR+	NA	NA	0	0	1	5089	invasive ductal carcinoma
XMFH-310	BRCA	II	56	HER2-	Non-TNBC	HR+	LuminalB	LuminalB(HER2-)	1	0	0	5085	invasive papillary carcinoma
XMFH-31	symptomatic control	control	28	NA	NA	NA	NA	NA	0	1	0	5035	benign tumor
XMFH-309	BRCA	na	38	NA	NA	NA	NA	NA	0	0	1	5072	invasive ductal carcinoma
XMFH-308	BRCA	II	65	HER2-	Non-TNBC	HR+	LuminalB	LuminalB(HER2-)	1	0	0	5062	invasive ductal carcinoma
XMFH-307	BRCA	I	68	HER2-	Non-TNBC	HR+	LuminalB	LuminalB(HER2-)	1	0	0	5086	invasive ductal carcinoma
XMFH-306	BRCA	II	51	NA	Non-TNBC	HR+	NA	NA	1	0	0	5060	invasive ductal carcinoma
XMFH-305	BRCA	II	40	HER2-	TNBC	HR-	NA	NA	0	1	0	5088	invasive ductal carcinoma
XMFH-304	BRCA	II	44	HER2-	Non-TNBC	HR+	LuminalB	LuminalB(HER2-)	1	0	0	5075	invasive ductal carcinoma
XMFH-303	BRCA	II	41	HER2-	Non-TNBC	HR+	LuminalB	LuminalB(HER2-)	1	0	0	5087	invasive ductal carcinoma
XMFH-302	symptomatic control	control	46	NA	NA	NA	NA	NA	0	0	1	5063	fibroadenomas
XMFH-301	BRCA	II	75	NA	Non-TNBC	HR+	NA	NA	1	0	0	5081	eccrine ductal carcinoma in situ
XMFH-300	symptomatic control	control	52	NA	NA	NA	NA	NA	0	0	1	5073	sclerosing adenosis
XMFH-30	BRCA	0	61	HER2+	Non-TNBC	HR+	LuminalB	LuminalB(HER2+)	0	0	1	4995	invasive ductal carcinoma
XMFH-299	BRCA	II	65	HER2-	Non-TNBC	HR+	LuminalB	LuminalB(HER2-)	0	0	1	5091	invasive ductal carcinoma
XMFH-298	BRCA	II	44	NA	NA	NA	NA	NA	1	0	0	5071	malignant follicular tumor
XMFH-297	BRCA	I	46	HER2+	Non-TNBC	HR-	NA	HER2+	0	0	1	5079	invasive ductal carcinoma
XMFH-296	BRCA	I	42	HER2-	TNBC	HR-	NA	NA	1	0	0	5084	invasive ductal carcinoma
XMFH-295	BRCA	II	50	NA	NA	NA	NA	NA	1	0	0	5082	invasive ductal carcinoma
XMFH-294	symptomatic control	control	51	NA	NA	NA	NA	NA	1	0	0	5066	sclerosing adenosis
XMFH-293	BRCA	I	56	HER2-	Non-TNBC	HR+	LuminalA	LuminalA	1	0	0	5076	invasive ductal carcinoma
XMFH-292	BRCA	0	58	HER2-	Non-TNBC	HR+	LuminalA	LuminalA	0	0	1	5085	ductal carcinoma in situ
XMFH-291	BRCA	III	47	HER2-	Non-TNBC	HR+	LuminalB	LuminalB(HER2-)	1	0	0	5065	invasive ductal carcinoma
XMFH-290	BRCA	II	54	HER2-	TNBC	HR-	NA	NA	0	1	0	5039	invasive ductal carcinoma
XMFH-289	symptomatic control	control	49	NA	NA	NA	NA	NA	0	0	1	5085	benign follicular tumor
XMFH-288	BRCA	I	88	HER2-	TNBC	HR-	NA	NA	1	0	0	5057	invasive ductal carcinoma
XMFH-287	symptomatic control	control	54	NA	NA	NA	NA	NA	1	0	0	5076	benign follicular tumor
XMFH-286	symptomatic control	control	50	NA	NA	NA	NA	NA	0	0	1	5089	benign tumor
XMFH-285	BRCA	II	54	NA	Non-TNBC	HR+	NA	NA	1	0	0	5089	invasive ductal carcinoma
XMFH-284	BRCA	III	37	HER2-	Non-TNBC	HR+	LuminalB	LuminalB(HER2-)	0	0	1	5077	invasive ductal carcinoma
XMFH-283	symptomatic control	control	26	NA	NA	NA	NA	NA	1	0	0	5022	benign tumor
XMFH-282	BRCA	II	43	HER2-	Non-TNBC	HR+	LuminalB	LuminalB(HER2-)	0	0	1	5079	invasive ductal carcinoma
XMFH-281	symptomatic control	control	54	NA	NA	NA	NA	NA	1	0	0	5087	benign tumor
XMFH-280	BRCA	IV	26	HER2+	Non-TNBC	HR+	LuminalB	LuminalB(HER2+)	1	0	0	5058	invasive ductal carcinoma
XMFH-279	BRCA	II	57	HER2+	Non-TNBC	HR-	NA	HER2+	1	0	0	5088	invasive ductal carcinoma
XMFH-278	BRCA	II	47	HER2+	Non-TNBC	HR+	LuminalB	LuminalB(HER2+)	1	0	0	5078	invasive ductal carcinoma
XMFH-277	symptomatic control	control	38	NA	NA	NA	NA	NA	0	0	1	5061	benign tumor
XMFH-276	BRCA	II	47	HER2+	Non-TNBC	HR+	LuminalB	LuminalB(HER2+)	0	1	0	5081	invasive ductal carcinoma
XMFH-275	BRCA	II	45	HER2+	Non-TNBC	HR-	NA	HER2+	1	0	0	5086	invasive ductal carcinoma
XMFH-274	symptomatic control	control	36	NA	NA	NA	NA	NA	1	0	0	5080	benign tumor
XMFH-272	post-mastectomy	NA	40	NA	NA	NA	NA	NA	0	0	0		left breast invasive carcinoma with focal low-to-intermediate-grade ductal carcinoma in situ detected.
XMFH-273	BRCA	0	44	NA	NA	NA	NA	NA	0	0	1	5078	invasive lobular carcinoma
XMFH-271	BRCA	I	40	NA	Non-TNBC	HR+	LuminalB	LuminalB	1	0	0	5077	invasive ductal carcinoma
XMFH-270	BRCA	II	40	HER2-	Non-TNBC	HR+	LuminalB	LuminalB(HER2-)	0	0	1	5059	invasive lobular carcinoma
XMFH-269	BRCA	I	27	HER2+	Non-TNBC	HR-	NA	HER2+	1	0	0	5082	invasive ductal carcinoma
XMFH-268	BRCA	II	51	HER2-	Non-TNBC	HR+	LuminalB	LuminalB(HER2-)	0	0	1	5067	invasive ductal carcinoma
XMFH-267	BRCA	II	41	NA	Non-TNBC	HR-	NA	NA	1	0	0	5083	invasive ductal carcinoma
XMFH-265	BRCA	II	48	HER2+	Non-TNBC	HR-	NA	HER2+	0	0	1	5065	invasive ductal carcinoma
XMFH-264	symptomatic control	control	43	NA	NA	NA	NA	NA	1	0	0	5071	sclerosing adenosis
XMFH-263	BRCA	II	44	HER2-	Non-TNBC	HR+	LuminalB	LuminalB(HER2-)	1	0	0	5068	invasive ductal carcinoma
XMFH-262	symptomatic control	control	39	NA	NA	NA	NA	NA	0	0	1	5075	fibroadenomas
XMFH-261	BRCA	II	59	NA	Non-TNBC	HR+	NA	NA	0	1	0	5083	invasive ductal carcinoma
XMFH-260	post-mastectomy	NA	52	NA	NA	NA	NA	NA	0	0	0		Initially diagnosed with invasive breast carcinoma; no remaining cancer detected in current examination.
XMFH-253	BRCA	II	39	HER2-	Non-TNBC	HR+	LuminalB	LuminalB(HER2-)	1	0	0	5081	invasive micropapillary carcinoma;invasive ductal carcinoma
XMFH-250	BRCA	II	51	HER2-	Non-TNBC	HR+	LuminalB	LuminalB(HER2-)	1	0	0	5075	invasive ductal carcinoma
XMFH-249	BRCA	I	44	HER2-	Non-TNBC	HR+	LuminalB	LuminalB(HER2-)	1	0	0	5055	invasive ductal carcinoma
XMFH-248	BRCA	II	36	HER2-	Non-TNBC	HR+	LuminalB	LuminalB(HER2-)	1	0	0	5063	invasive lobular carcinoma
XMFH-245	BRCA	I	53	HER2+	Non-TNBC	HR+	LuminalB	LuminalB(HER2+)	0	1	0	5090	invasive ductal carcinoma
XMFH-244	BRCA	I	52	HER2-	Non-TNBC	HR+	LuminalB	LuminalB(HER2-)	0	0	1	5059	invasive ductal carcinoma
XMFH-243	BRCA	I	56	HER2-	Non-TNBC	HR+	LuminalB	LuminalB(HER2-)	1	0	0	5068	intraductal carcinoma
XMFH-242	BRCA	II	58	HER2+	Non-TNBC	HR+	LuminalB	LuminalB(HER2+)	0	1	0	5074	invasive ductal carcinoma
XMFH-241	BRCA	I	43	HER2-	Non-TNBC	HR+	LuminalA	LuminalA	1	0	0	5074	mucous carcinoma
XMFH-240	symptomatic control	control	67	NA	NA	NA	NA	NA	1	0	0	5083	fibroadenomas
XMFH-239	symptomatic control	control	30	NA	NA	NA	NA	NA	0	0	1	5068	granulomatous lobular mastitis
XMFH-208	BRCA	II	82	HER2-	TNBC	HR-	NA	NA	0	1	0	5067	invasive ductal carcinoma
XMFH-204	BRCA	III	58	NA	Non-TNBC	HR+	LuminalB	LuminalB	1	0	0	5086	invasive ductal carcinoma
XMFH-203	BRCA	II	52	NA	Non-TNBC	HR+	LuminalB	LuminalB	0	0	1	5082	invasive ductal carcinoma
XMFH-202	BRCA	I	49	HER2-	Non-TNBC	HR+	LuminalA	LuminalA	0	1	0	5064	invasive ductal carcinoma
XMFH-201	symptomatic control	control	49	NA	NA	NA	NA	NA	1	0	0	5059	sclerosing adenosis
XMFH-200	symptomatic control	control	39	NA	NA	NA	NA	NA	1	0	0	5074	sclerosing adenosis
XMFH-198	symptomatic control	control	53	NA	NA	NA	NA	NA	0	0	1	5011	fibroadenomas
XMFH-197	symptomatic control	control	39	NA	NA	NA	NA	NA	1	0	0	5077	benign follicular tumor
XMFH-194	BRCA	II	43	HER2+	Non-TNBC	HR+	LuminalB	LuminalB(HER2+)	1	0	0	5071	invasive ductal carcinoma
XMFH-193	BRCA	II	51	NA	Non-TNBC	HR+	LuminalB	LuminalB	1	0	0	5016	invasive ductal carcinoma
XMFH-192	symptomatic control	control	41	NA	NA	NA	NA	NA	0	0	1	4976	sclerosing adenosis
XMFH-190	BRCA	II	34	HER2-	TNBC	HR-	NA	NA	0	0	1	5047	metaplastic carcinoma
XMFH-188	symptomatic control	control	39	NA	NA	NA	NA	NA	1	0	0	5062	granulomatous lobular mastitis
XMFH-187	BRCA	III	45	HER2-	Non-TNBC	HR+	LuminalB	LuminalB(HER2-)	1	0	0	5060	invasive carcinoma
XMFH-183	BRCA	II	56	HER2+	Non-TNBC	HR+	LuminalB	LuminalB(HER2+)	1	0	0	5073	invasive ductal carcinoma
XMFH-180	BRCA	II	51	HER2+	Non-TNBC	HR+	LuminalB	LuminalB(HER2+)	0	0	1	5064	invasive ductal carcinoma
XMFH-18	BRCA	III	69	HER2-	Non-TNBC	HR+	LuminalB	LuminalB(HER2-)	0	0	1	5026	invasive ductal carcinoma
XMFH-177	BRCA	I	47	HER2-	Non-TNBC	HR+	LuminalA	LuminalA	0	1	0	5072	invasive ductal carcinoma
XMFH-175	symptomatic control	control	49	NA	NA	NA	NA	NA	1	0	0	5046	sclerosing adenosis
XMFH-174	BRCA	II	55	HER2-	Non-TNBC	HR+	LuminalB	LuminalB(HER2-)	1	0	0	5079	invasive ductal carcinoma
XMFH-173	symptomatic control	control	52	NA	NA	NA	NA	NA	0	1	0	5046	intraductal papilloma
XMFH-171	BRCA	II	39	HER2-	TNBC	HR-	NA	NA	0	0	1	5062	invasive ductal carcinoma
XMFH-169	BRCA	II	43	HER2-	Non-TNBC	HR+	LuminalB	LuminalB(HER2-)	1	0	0	5053	invasive ductal carcinoma
XMFH-168	BRCA	III	38	HER2-	Non-TNBC	HR+	LuminalB	LuminalB(HER2-)	0	1	0	5057	invasive lobular carcinoma
XMFH-166	BRCA	II	52	HER2-	Non-TNBC	HR+	LuminalB	LuminalB(HER2-)	0	0	1	5060	invasive ductal carcinoma
XMFH-163	BRCA	II	59	HER2+	Non-TNBC	HR-	NA	HER2+	0	0	1	5076	NA
XMFH-162	BRCA	II	65	HER2-	Non-TNBC	HR+	LuminalA	LuminalA	0	1	0	5064	invasive ductal carcinoma
XMFH-16	BRCA	III	51	HER2+	Non-TNBC	HR-	NA	HER2+	0	1	0	4985	invasive ductal carcinoma
XMFH-156	BRCA	I	58	HER2-	Non-TNBC	HR+	LuminalA	LuminalA	1	0	0	5053	Mucous carcinoma
XMFH-155	symptomatic control	control	35	NA	NA	NA	NA	NA	1	0	0	5048	fibroadenomas
XMFH-152	BRCA	II	52	HER2-	Non-TNBC	HR+	LuminalB	LuminalB(HER2-)	1	0	0	5068	invasive ductal carcinoma
XMFH-150	BRCA	I	54	HER2-	Non-TNBC	HR+	LuminalA	LuminalA	0	1	0	5060	invasive lobular carcinoma
XMFH-149	symptomatic control	control	28	NA	NA	NA	NA	NA	1	0	0	5060	fibroadenomas
XMFH-146	BRCA	II	39	HER2-	Non-TNBC	HR+	LuminalA	LuminalA	1	0	0	4944	invasive ductal carcinoma
XMFH-145	symptomatic control	control	48	NA	NA	NA	NA	NA	0	0	1	4958	intraductal papilloma
XMFH-144	BRCA	III	63	HER2-	NA	NA	NA	NA	0	1	0	4988	invasive ductal carcinoma
XMFH-143	symptomatic control	control	26	NA	NA	NA	NA	NA	0	0	1	5023	fibroadenomas
XMFH-137	symptomatic control	control	66	NA	NA	NA	NA	NA	1	0	0	4802	fibroadenomas
XMFH-136	BRCA	III	50	NA	Non-TNBC	HR+	LuminalB	LuminalB	1	0	0	5001	invasive ductal carcinoma
XMFH-135	symptomatic control	control	49	NA	NA	NA	NA	NA	0	1	0	4982	intraductal papilloma
XMFH-134	BRCA	II	45	NA	Non-TNBC	HR+	LuminalB	LuminalB	1	0	0	4990	NA
XMFH-131	BRCA	II	56	HER2+	Non-TNBC	HR-	NA	HER2+	1	0	0	5007	invasive ductal carcinoma
XMFH-126	BRCA	I	39	NA	Non-TNBC	HR+	LuminalB	LuminalB	1	0	0	4974	invasive ductal carcinoma
XMFH-123	BRCA	IV	45	HER2-	Non-TNBC	HR+	LuminalA	LuminalA	0	1	0	4989	invasive ductal carcinoma
XMFH-120	BRCA	III	53	NA	Non-TNBC	HR+	LuminalB	LuminalB	0	0	1	5045	invasive ductal carcinoma
XMFH-119	BRCA	II	47	HER2-	TNBC	HR-	NA	NA	0	0	1	4992	invasive ductal carcinoma
XMFH-118	BRCA	II	58	HER2+	Non-TNBC	HR-	NA	HER2+	0	0	1	5037	invasive ductal carcinoma
XMFH-117	BRCA	I	58	HER2+	Non-TNBC	HR-	NA	HER2+	1	0	0	5023	invasive ductal carcinoma
XMFH-116	BRCA	II	37	NA	Non-TNBC	HR+	LuminalB	LuminalB	1	0	0	4951	invasive ductal carcinoma
XMFH-115	symptomatic control	control	56	NA	NA	NA	NA	NA	1	0	0	4689	benign tumor
XMFH-114	symptomatic control	control	41	NA	NA	NA	NA	NA	0	0	1	4992	granulomatous lobular mastitis
Vumc-HD-9-TR1152	asymptomatic control	control	41	NA	NA	NA	NA	NA	0	1	0	4865	NA
Vumc-HD-98-TR921	asymptomatic control	control	50	NA	NA	NA	NA	NA	0	0	1	5015	NA
Vumc-HD-93-TR1085	asymptomatic control	control	24	NA	NA	NA	NA	NA	1	0	0	5039	NA
Vumc-HD-92-TR920	asymptomatic control	control	36	NA	NA	NA	NA	NA	1	0	0	4290	NA
Vumc-HD-91-TR897	asymptomatic control	control	59	NA	NA	NA	NA	NA	0	0	1	5000	NA
Vumc-HD-89-TR896	asymptomatic control	control	45	NA	NA	NA	NA	NA	0	0	1	5079	NA
Vumc-HD-88-TR895	asymptomatic control	control	50	NA	NA	NA	NA	NA	1	0	0	5094	NA
Vumc-HD-87-TR894	asymptomatic control	control	40	NA	NA	NA	NA	NA	1	0	0	4971	NA
Vumc-HD-86-TR893	asymptomatic control	control	45	NA	NA	NA	NA	NA	0	0	1	4929	NA
Vumc-HD-84-TR892	asymptomatic control	control	37	NA	NA	NA	NA	NA	1	0	0	4997	NA
Vumc-HD-83-TR891	asymptomatic control	control	65	NA	NA	NA	NA	NA	0	0	1	4955	NA
Vumc-HD-81-TR890	asymptomatic control	control	40	NA	NA	NA	NA	NA	0	0	1	5031	NA
Vumc-HD-80-TR889	asymptomatic control	control	39	NA	NA	NA	NA	NA	0	1	0	5036	NA
Vumc-HD-75-TR1065	asymptomatic control	control	27	NA	NA	NA	NA	NA	0	0	1	5015	NA
Vumc-HD-74-TR888	asymptomatic control	control	60	NA	NA	NA	NA	NA	1	0	0	5070	NA
Vumc-HD-73-TR887	asymptomatic control	control	40	NA	NA	NA	NA	NA	0	1	0	5053	NA
Vumc-HD-69-TR1061	asymptomatic control	control	24	NA	NA	NA	NA	NA	0	1	0	5039	NA
Vumc-HD-63-TR886	asymptomatic control	control	49	NA	NA	NA	NA	NA	1	0	0	5047	NA
Vumc-HD-60-TR885	asymptomatic control	control	44	NA	NA	NA	NA	NA	0	0	1	5021	NA
Vumc-HD-5-TR1151	asymptomatic control	control	64	NA	NA	NA	NA	NA	0	0	1	4989	NA
Vumc-HD-56-TR884	asymptomatic control	control	47	NA	NA	NA	NA	NA	0	0	1	5097	NA
Vumc-HD-54-1-TR1172	asymptomatic control	control	64	NA	NA	NA	NA	NA	0	1	0	4931	NA
Vumc-HD-53-1-TR1171	asymptomatic control	control	54	NA	NA	NA	NA	NA	0	0	1	4936	NA
Vumc-HD-52-TR1489	asymptomatic control	control	76	NA	NA	NA	NA	NA	1	0	0	4941	NA
Vumc-HD-51-1-TR1170	asymptomatic control	control	41	NA	NA	NA	NA	NA	1	0	0	4909	NA
Vumc-HD-50-1-TR1169	asymptomatic control	control	62	NA	NA	NA	NA	NA	0	0	1	4947	NA
Vumc-HD-4-TR1150	asymptomatic control	control	43	NA	NA	NA	NA	NA	1	0	0	5014	NA
Vumc-HD-49-1-TR1168	asymptomatic control	control	54	NA	NA	NA	NA	NA	1	0	0	4797	NA
Vumc-HD-47-1-TR1167	asymptomatic control	control	49	NA	NA	NA	NA	NA	0	0	1	4904	NA
Vumc-HD-44-2-TR1166	asymptomatic control	control	33	NA	NA	NA	NA	NA	0	1	0	4460	NA
Vumc-HD-40-1-TR1159	asymptomatic control	control	21	NA	NA	NA	NA	NA	1	0	0	4983	NA
Vumc-HD-39-1-TR1158	asymptomatic control	control	22	NA	NA	NA	NA	NA	1	0	0	5027	NA
Vumc-HD-36-TR1165	asymptomatic control	control	38	NA	NA	NA	NA	NA	1	0	0	5059	NA
Vumc-HD-32-2-TR1164	asymptomatic control	control	27	NA	NA	NA	NA	NA	0	0	1	4824	NA
Vumc-HD-3-1-TR1149	asymptomatic control	control	53	NA	NA	NA	NA	NA	1	0	0	4884	NA
Vumc-HD-30-2-TR1163	asymptomatic control	control	29	NA	NA	NA	NA	NA	1	0	0	4967	NA
Vumc-HD-283-TR1874	asymptomatic control	control	56	NA	NA	NA	NA	NA	1	0	0	4768	NA
Vumc-HD-280-TR1870	asymptomatic control	control	50	NA	NA	NA	NA	NA	0	1	0	4783	NA
Vumc-HD-272-TR1876	asymptomatic control	control	55	NA	NA	NA	NA	NA	1	0	0	4727	NA
Vumc-HD-27-2-TR1162	asymptomatic control	control	36	NA	NA	NA	NA	NA	0	0	1	4824	NA
Vumc-HD-264-TR1867	asymptomatic control	control	56	NA	NA	NA	NA	NA	1	0	0	4864	NA
Vumc-HD-263-TR1877	asymptomatic control	control	56	NA	NA	NA	NA	NA	1	0	0	4659	NA
Vumc-HD-262-TR1866	asymptomatic control	control	55	NA	NA	NA	NA	NA	1	0	0	4993	NA
Vumc-HD-239-TR1781	asymptomatic control	control	48	NA	NA	NA	NA	NA	1	0	0	4466	NA
Vumc-HD-238-TR1878	asymptomatic control	control	51	NA	NA	NA	NA	NA	0	1	0	4801	NA
Vumc-HD-236-TR1782	asymptomatic control	control	63	NA	NA	NA	NA	NA	1	0	0	4716	NA
Vumc-HD-235-TR1761	asymptomatic control	control	50	NA	NA	NA	NA	NA	0	0	1	4586	NA
Vumc-HD-234-TR1717	asymptomatic control	control	53	NA	NA	NA	NA	NA	0	1	0	4760	NA
Vumc-HD-233-TR1879	asymptomatic control	control	55	NA	NA	NA	NA	NA	0	0	1	4543	NA
Vumc-HD-230-TR1881	asymptomatic control	control	52	NA	NA	NA	NA	NA	0	1	0	3717	NA
Vumc-HD-229-TR1882	asymptomatic control	control	51	NA	NA	NA	NA	NA	1	0	0	4776	NA
Vumc-HD-228-TR1883	asymptomatic control	control	58	NA	NA	NA	NA	NA	1	0	0	3209	NA
Vumc-HD-227-TR1716	asymptomatic control	control	51	NA	NA	NA	NA	NA	1	0	0	4655	NA
Vumc-HD-226-TR1718	asymptomatic control	control	57	NA	NA	NA	NA	NA	0	0	1	4475	NA
Vumc-HD-225-TR1884	asymptomatic control	control	55	NA	NA	NA	NA	NA	0	0	1	4463	NA
Vumc-HD-224-TR1885	asymptomatic control	control	59	NA	NA	NA	NA	NA	0	0	1	3909	NA
Vumc-HD-22-1-TR1157	asymptomatic control	control	52	NA	NA	NA	NA	NA	1	0	0	4899	NA
Vumc-HD-2-1-TR1148	asymptomatic control	control	53	NA	NA	NA	NA	NA	0	0	1	4971	NA
Vumc-HD-218-TR1905	asymptomatic control	control	54	NA	NA	NA	NA	NA	0	0	1	4928	NA
Vumc-HD-217-TR1915	asymptomatic control	control	52	NA	NA	NA	NA	NA	0	1	0	4822	NA
Vumc-HD-21-1-TR1161	asymptomatic control	control	39	NA	NA	NA	NA	NA	1	0	0	4894	NA
Vumc-HD-20-1-TR1156	asymptomatic control	control	46	NA	NA	NA	NA	NA	1	0	0	4873	NA
Vumc-HD-199-TR1914	asymptomatic control	control	62	NA	NA	NA	NA	NA	0	0	1	5066	NA
Vumc-HD-198-TR1907	asymptomatic control	control	55	NA	NA	NA	NA	NA	0	1	0	4971	NA
Vumc-HD-196-TR1852	asymptomatic control	control	47	NA	NA	NA	NA	NA	1	0	0	5048	NA
Vumc-HD-195-TR1851	asymptomatic control	control	52	NA	NA	NA	NA	NA	1	0	0	4308	NA
Vumc-HD-189-TR1850	asymptomatic control	control	69	NA	NA	NA	NA	NA	1	0	0	4426	NA
Vumc-HD-188-TR1849	asymptomatic control	control	60	NA	NA	NA	NA	NA	1	0	0	4614	NA
Vumc-HD-186-TR1759	asymptomatic control	control	47	NA	NA	NA	NA	NA	0	0	1	4880	NA
Vumc-HD-180-TR1523	asymptomatic control	control	63	NA	NA	NA	NA	NA	0	0	1	5081	NA
Vumc-HD-17-1-TR1160	asymptomatic control	control	27	NA	NA	NA	NA	NA	1	0	0	4926	NA
Vumc-HD-169-TR1758	asymptomatic control	control	42	NA	NA	NA	NA	NA	0	0	1	4596	NA
Vumc-HD-163-TR1757	asymptomatic control	control	44	NA	NA	NA	NA	NA	1	0	0	3830	NA
Vumc-HD-162-TR1756	asymptomatic control	control	42	NA	NA	NA	NA	NA	0	0	1	4773	NA
Vumc-HD-161-TR1522	asymptomatic control	control	68	NA	NA	NA	NA	NA	1	0	0	2856	NA
Vumc-HD-16-1-TR1155	asymptomatic control	control	43	NA	NA	NA	NA	NA	1	0	0	4804	NA
Vumc-HD-156-TR935	asymptomatic control	control	42	NA	NA	NA	NA	NA	0	1	0	5070	NA
Vumc-HD-155-TR934	asymptomatic control	control	42	NA	NA	NA	NA	NA	1	0	0	4498	NA
Vumc-HD-154-TR1136	asymptomatic control	control	26	NA	NA	NA	NA	NA	1	0	0	5065	NA
Vumc-HD-153-TR1135	asymptomatic control	control	26	NA	NA	NA	NA	NA	0	0	1	4956	NA
Vumc-HD-152-TR1134	asymptomatic control	control	32	NA	NA	NA	NA	NA	0	0	1	4794	NA
Vumc-HD-151-TR933	asymptomatic control	control	42	NA	NA	NA	NA	NA	1	0	0	4859	NA
Vumc-HD-15-1-TR1154	asymptomatic control	control	26	NA	NA	NA	NA	NA	0	1	0	5078	NA
Vumc-HD-150-TR1133	asymptomatic control	control	32	NA	NA	NA	NA	NA	0	0	1	5065	NA
Vumc-HD-149-TR932	asymptomatic control	control	39	NA	NA	NA	NA	NA	1	0	0	4493	NA
Vumc-HD-145-TR930	asymptomatic control	control	38	NA	NA	NA	NA	NA	0	1	0	4932	NA
Vumc-HD-144-TR929	asymptomatic control	control	55	NA	NA	NA	NA	NA	0	0	1	4973	NA
Vumc-HD-143-TR928	asymptomatic control	control	38	NA	NA	NA	NA	NA	0	0	1	4913	NA
Vumc-HD-142-TR927	asymptomatic control	control	48	NA	NA	NA	NA	NA	1	0	0	4784	NA
Vumc-HD-136-TR1125	asymptomatic control	control	20	NA	NA	NA	NA	NA	0	0	1	4335	NA
Vumc-HD-135-TR1124	asymptomatic control	control	23	NA	NA	NA	NA	NA	1	0	0	4364	NA
Vumc-HD-130-TR926	asymptomatic control	control	57	NA	NA	NA	NA	NA	1	0	0	4859	NA
Vumc-HD-129-TR1120	asymptomatic control	control	33	NA	NA	NA	NA	NA	1	0	0	5000	NA
Vumc-HD-128-TR1119	asymptomatic control	control	24	NA	NA	NA	NA	NA	1	0	0	4700	NA
Vumc-HD-127-TR925	asymptomatic control	control	52	NA	NA	NA	NA	NA	1	0	0	5026	NA
Vumc-HD-126-TR1118	asymptomatic control	control	32	NA	NA	NA	NA	NA	1	0	0	4072	NA
Vumc-HD-123-TR1115	asymptomatic control	control	27	NA	NA	NA	NA	NA	1	0	0	4994	NA
Vumc-HD-122-TR1114	asymptomatic control	control	25	NA	NA	NA	NA	NA	1	0	0	4969	NA
Vumc-HD-120-TR1112	asymptomatic control	control	33	NA	NA	NA	NA	NA	0	1	0	4761	NA
Vumc-HD-119-TR1111	asymptomatic control	control	32	NA	NA	NA	NA	NA	1	0	0	4993	NA
Vumc-HD-116-TR1108	asymptomatic control	control	32	NA	NA	NA	NA	NA	0	0	1	5084	NA
Vumc-HD-115-TR1107	asymptomatic control	control	29	NA	NA	NA	NA	NA	1	0	0	4934	NA
Vumc-HD-113-TR1105	asymptomatic control	control	22	NA	NA	NA	NA	NA	1	0	0	4974	NA
Vumc-HD-112-TR1104	asymptomatic control	control	21	NA	NA	NA	NA	NA	1	0	0	4872	NA
Vumc-HD-11-1-TR1153	asymptomatic control	control	27	NA	NA	NA	NA	NA	1	0	0	4932	NA
Vumc-HD-110-TR1102	asymptomatic control	control	23	NA	NA	NA	NA	NA	1	0	0	4987	NA
Vumc-HD-108-TR924	asymptomatic control	control	56	NA	NA	NA	NA	NA	1	0	0	4939	NA
Vumc-HD-107-TR1100	asymptomatic control	control	24	NA	NA	NA	NA	NA	1	0	0	4981	NA
Vumc-HD-103-TR923	asymptomatic control	control	54	NA	NA	NA	NA	NA	0	0	1	5001	NA
Vumc-HD-101-TR922	asymptomatic control	control	35	NA	NA	NA	NA	NA	0	1	0	5063	NA
Vumc-HD-100-TR1095	asymptomatic control	control	33	NA	NA	NA	NA	NA	1	0	0	5065	NA
VUMC-HC442-HD-TR3323	asymptomatic control	control	78	NA	NA	NA	NA	NA	0	0	1	4704	NA
VUMC-HC440-HD-TR3446	asymptomatic control	control	52	NA	NA	NA	NA	NA	0	0	1	5024	NA
VUMC-HC428-HD-TR3325	asymptomatic control	control	67	NA	NA	NA	NA	NA	1	0	0	4965	NA
VUMC-HC425-HD-TR3322	asymptomatic control	control	63	NA	NA	NA	NA	NA	1	0	0	4901	NA
VUMC-HC423-HD-TR3444	asymptomatic control	control	58	NA	NA	NA	NA	NA	1	0	0	5034	NA
Vumc-HC-0414-TR2648	asymptomatic control	control	60	NA	NA	NA	NA	NA	1	0	0	4958	NA
Vumc-HC-0412-TR2647	asymptomatic control	control	60	NA	NA	NA	NA	NA	0	1	0	4689	NA
Vumc-HC-0411-TR2646	asymptomatic control	control	62	NA	NA	NA	NA	NA	1	0	0	4500	NA
Vumc-HC-0406-TR2645	asymptomatic control	control	62	NA	NA	NA	NA	NA	1	0	0	4933	NA
Vumc-HC-0405-TR2644	asymptomatic control	control	62	NA	NA	NA	NA	NA	1	0	0	4961	NA
Vumc-HC-0403-TR2643	asymptomatic control	control	70	NA	NA	NA	NA	NA	0	1	0	4745	NA
Vumc-HC-0396-TR2642	asymptomatic control	control	63	NA	NA	NA	NA	NA	0	0	1	4275	NA
Vumc-HC-0388-TR2641	asymptomatic control	control	60	NA	NA	NA	NA	NA	1	0	0	4990	NA
VUMC-HC-0302-TR2613	asymptomatic control	control	60	NA	NA	NA	NA	NA	0	0	1	3759	NA
VUMC-HC0172-DOT-HD-48h-TR3107	asymptomatic control	control	63	NA	NA	NA	NA	NA	0	1	0	4904	NA
VUMC-HC0166-DOT-HD-48h-TR3105	asymptomatic control	control	67	NA	NA	NA	NA	NA	1	0	0	4991	NA
VUMC-HC0161-DOT-HD-48h-TR3137	asymptomatic control	control	69	NA	NA	NA	NA	NA	1	0	0	4983	NA
VUMC-HC0151-DOT-HD-48h-TR3136	asymptomatic control	control	70	NA	NA	NA	NA	NA	0	1	0	4956	NA
VUMC-HC0144-DOT-HD-48h-TR3073	asymptomatic control	control	64	NA	NA	NA	NA	NA	1	0	0	5008	NA
VUMC-HC0140-DOT-HD-48h-TR3071	asymptomatic control	control	65	NA	NA	NA	NA	NA	1	0	0	5022	NA
VUMC-HC0131-DOT-HD-48h-TR3069	asymptomatic control	control	67	NA	NA	NA	NA	NA	0	0	1	5013	NA
VUMC-HC0129-DOT-HD-48h-TR3068	asymptomatic control	control	75	NA	NA	NA	NA	NA	0	0	1	4977	NA
VUMC-HC0125-DOT-HD-48h-TR3067	asymptomatic control	control	77	NA	NA	NA	NA	NA	0	1	0	5043	NA
VUMC-HC0118-DOT-HD-48h-TR3066	asymptomatic control	control	66	NA	NA	NA	NA	NA	1	0	0	5018	NA
VUMC-HC0103-DOT-HD-48h-TR3065	asymptomatic control	control	74	NA	NA	NA	NA	NA	1	0	0	5020	NA
VUMC-HC0102-DOT-HD-48h-TR3064	asymptomatic control	control	66	NA	NA	NA	NA	NA	0	0	1	5038	NA
VUMC-HC0097-DOT-HD-48h-TR3098	asymptomatic control	control	66	NA	NA	NA	NA	NA	0	0	1	4904	NA
VUMC-HC0096-DOT-HD-48h-TR3097	asymptomatic control	control	63	NA	NA	NA	NA	NA	0	0	1	4933	NA
VUMC-HC0095-DOT-HD-48h-TR3096	asymptomatic control	control	63	NA	NA	NA	NA	NA	1	0	0	5048	NA
VUMC-HC0094-DOT-HD-48h-TR3095	asymptomatic control	control	69	NA	NA	NA	NA	NA	1	0	0	4948	NA
VUMC-HC0083-DOT-HD-48h-TR3093	asymptomatic control	control	69	NA	NA	NA	NA	NA	1	0	0	5033	NA
VUMC-HC0082-DOT-HD-48h-TR3092	asymptomatic control	control	70	NA	NA	NA	NA	NA	0	1	0	5086	NA
VUMC-HC0069-DOT-HD-48h-TR3094	asymptomatic control	control	62	NA	NA	NA	NA	NA	0	0	1	4659	NA
VUMC-HC-0056-TR2638	asymptomatic control	control	64	NA	NA	NA	NA	NA	1	0	0	5014	NA
VUMC-HC0053-DOT-HD-48h-TR3087	asymptomatic control	control	63	NA	NA	NA	NA	NA	1	0	0	5045	NA
Vumc-HC-0017-TR2590	asymptomatic control	control	61	NA	NA	NA	NA	NA	0	1	0	4804	NA
Vumc-HC-0009-TR2589	asymptomatic control	control	61	NA	NA	NA	NA	NA	0	1	0	4931	NA
Vumc-BRMETA-VU692-TR2166	BRCA	IV	72	NA	NA	NA	NA	NA	0	0	1	5092	NA
Vumc-BRMETA-VU654-TR2158	BRCA	IV	60	NA	NA	NA	NA	NA	0	1	0	3654	NA
Vumc-BRMETA-16-TR2161	BRCA	IV	43	NA	NA	NA	NA	NA	0	0	1	4868	NA
Vumc-BRMETA-13-TR1451	BRCA	IV	62	NA	NA	NA	NA	NA	0	0	1	4266	NA
Vumc-BRMETA-12-TR1450	BRCA	IV	46	NA	NA	NA	NA	NA	0	1	0	5034	NA
Vumc-Brain-metastasis-BRMETA3t0-TR1543	BRCA	IV	56	NA	NA	NA	NA	NA	1	0	0	3948	NA
Vienna-CRC-Vien-4-TR2951	asymptomatic control	control	33	NA	NA	NA	NA	NA	1	0	0	4952	NA
Vienna-CRC-Vien-23-TR3008	asymptomatic control	control	29	NA	NA	NA	NA	NA	1	0	0	4813	NA
Vienna-CRC-Vien-21-TR3006	asymptomatic control	control	30	NA	NA	NA	NA	NA	1	0	0	5028	NA
Vienna-CRC-Vien-1-TR2948	asymptomatic control	control	36	NA	NA	NA	NA	NA	1	0	0	4634	NA
UMCU-NSAth-1-0190-TR832	asymptomatic control	control	71	NA	NA	NA	NA	NA	0	1	0	4376	NA
UMCU-NSAth-1-0155-TR831	asymptomatic control	control	48	NA	NA	NA	NA	NA	0	0	1	4712	NA
UMCU-NSAth-1-0151-TR830	asymptomatic control	control	63	NA	NA	NA	NA	NA	1	0	0	4240	NA
UMCU-NSAth-1-0147-TR829	asymptomatic control	control	63	NA	NA	NA	NA	NA	1	0	0	5028	NA
UMCU-non-sign-atHERo-4-1691-TR1990	asymptomatic control	control	42	NA	NA	NA	NA	NA	1	0	0	4519	NA
UMCU-non-sign-atHERo-4-1669-TR1987	asymptomatic control	control	53	NA	NA	NA	NA	NA	1	0	0	4525	NA
UMCU-non-sign-atHERo-2-0657-TR1986	asymptomatic control	control	65	NA	NA	NA	NA	NA	1	0	0	4501	NA
UMCU-HC-1-0212-TR818	asymptomatic control	control	51	NA	NA	NA	NA	NA	1	0	0	5000	NA
UMCU-HC-1-0210-TR819	asymptomatic control	control	52	NA	NA	NA	NA	NA	0	0	1	2974	NA
UMCU-HC-1-0205-TR811	asymptomatic control	control	40	NA	NA	NA	NA	NA	0	0	1	4861	NA
UMCU-HC-1-0197-TR824	asymptomatic control	control	54	NA	NA	NA	NA	NA	0	0	1	4917	NA
TR4815-NSCLC-MAAS	asymptomatic control	control	67	NA	NA	NA	NA	NA	0	1	0	4798	NA
TR4813-NSCLC-MAAS	asymptomatic control	control	60	NA	NA	NA	NA	NA	1	0	0	4986	NA
TR4809-NSCLC-MAAS	asymptomatic control	control	75	NA	NA	NA	NA	NA	1	0	0	5019	NA
TR4806-NSCLC-MAAS	asymptomatic control	control	70	NA	NA	NA	NA	NA	0	0	1	4862	NA
TR4803-NSCLC-MAAS	asymptomatic control	control	65	NA	NA	NA	NA	NA	1	0	0	4941	NA
TR4802-NSCLC-MAAS	asymptomatic control	control	62	NA	NA	NA	NA	NA	0	0	1	4736	NA
TR4801-NSCLC-MAAS	asymptomatic control	control	54	NA	NA	NA	NA	NA	1	0	0	4958	NA
TR4799-NSCLC-MAAS	asymptomatic control	control	64	NA	NA	NA	NA	NA	1	0	0	4801	NA
TR4798-NSCLC-MAAS	asymptomatic control	control	52	NA	NA	NA	NA	NA	1	0	0	4956	NA
TR4796-NSCLC-MAAS	asymptomatic control	control	55	NA	NA	NA	NA	NA	0	1	0	4991	NA
TR4795-NSCLC-MAAS	asymptomatic control	control	61	NA	NA	NA	NA	NA	0	1	0	4960	NA
TR4039-HD-NKI	asymptomatic control	control	57	NA	NA	NA	NA	NA	1	0	0	4728	NA
TR3477-HD-NKI	asymptomatic control	control	40	NA	NA	NA	NA	NA	0	0	1	4635	NA
TR3431-HD-NKI	asymptomatic control	control	67	NA	NA	NA	NA	NA	1	0	0	5032	NA
TR3428-HD-NKI	asymptomatic control	control	74	NA	NA	NA	NA	NA	1	0	0	4862	NA
TR3299-HD-NKI	asymptomatic control	control	46	NA	NA	NA	NA	NA	1	0	0	4664	NA
TR3223-BREAST-MGH	BRCA	I	57	NA	NA	NA	NA	NA	0	0	1	5027	NA
NKI-107-005500-HD-TR3288	asymptomatic control	control	74	NA	NA	NA	NA	NA	0	1	0	4756	NA
NKI-107-005497-HD-TR3287	asymptomatic control	control	68	NA	NA	NA	NA	NA	1	0	0	4722	NA
NKI-107-005484-HD-TR3285	asymptomatic control	control	70	NA	NA	NA	NA	NA	0	1	0	4998	NA
NKI-107-005472-HD-TR3284	asymptomatic control	control	64	NA	NA	NA	NA	NA	0	1	0	4862	NA
NKI-107-005462-HD-TR3283	asymptomatic control	control	24	NA	NA	NA	NA	NA	0	0	1	4653	NA
NKI-107-005461-HD-TR3482	asymptomatic control	control	21	NA	NA	NA	NA	NA	0	0	1	4875	NA
NKI-107-005456-HD-TR3479	asymptomatic control	control	64	NA	NA	NA	NA	NA	0	1	0	4849	NA
NKI-107-005455-HD-TR3478	asymptomatic control	control	37	NA	NA	NA	NA	NA	1	0	0	4876	NA
NKI-107-005440-HD-TR3289	asymptomatic control	control	21	NA	NA	NA	NA	NA	1	0	0	4883	NA
NKI-107-005437-HD-TR3475	asymptomatic control	control	21	NA	NA	NA	NA	NA	0	0	1	4559	NA
NKI-107-005433-HD-TR3301	asymptomatic control	control	52	NA	NA	NA	NA	NA	0	0	1	4802	NA
NKI-107-005417-HD-TR3293	asymptomatic control	control	56	NA	NA	NA	NA	NA	0	0	1	4888	NA
NKI-107-005414-HD-TR3433	asymptomatic control	control	50	NA	NA	NA	NA	NA	0	0	1	4647	NA
NKI-107-005404-HD-TR3427	asymptomatic control	control	66	NA	NA	NA	NA	NA	0	1	0	4380	NA
NKI-107-005402-HD-TR3425	asymptomatic control	control	25	NA	NA	NA	NA	NA	1	0	0	4601	NA
NKI-107-005400-HD-TR3424	asymptomatic control	control	42	NA	NA	NA	NA	NA	0	0	1	4776	NA
NKI-107-005389-HD-TR3460	asymptomatic control	control	65	NA	NA	NA	NA	NA	0	1	0	4980	NA
NKI-107-005386-HD-TR3497	asymptomatic control	control	65	NA	NA	NA	NA	NA	0	1	0	4765	NA
NKI-107-005385-HD-TR3458	asymptomatic control	control	39	NA	NA	NA	NA	NA	0	0	1	4919	NA
NKI-107-005384-HD-TR3457	asymptomatic control	control	72	NA	NA	NA	NA	NA	0	0	1	4890	NA
NKI-107-005379-HD-TR3455	asymptomatic control	control	54	NA	NA	NA	NA	NA	0	1	0	4767	NA
NKI-107-005371-HD-TR3451	asymptomatic control	control	52	NA	NA	NA	NA	NA	1	0	0	4644	NA
NKI-107-005370-HD-TR3396	asymptomatic control	control	64	NA	NA	NA	NA	NA	0	0	1	4712	NA
NKI-107-005315-HD-TR3386	asymptomatic control	control	55	NA	NA	NA	NA	NA	1	0	0	3884	NA
NKI-107-005314-HD-TR3349	asymptomatic control	control	51	NA	NA	NA	NA	NA	0	1	0	4710	NA
NKI-107-005310-HD-TR3346	asymptomatic control	control	50	NA	NA	NA	NA	NA	1	0	0	4728	NA
NKI-107-005304-HD-TR3344	asymptomatic control	control	59	NA	NA	NA	NA	NA	0	0	1	4855	NA
NKI-107-005289-HD-TR3341	asymptomatic control	control	71	NA	NA	NA	NA	NA	0	0	1	4697	NA
MGH-H-216-Breast-TR3143	BRCA	I	56	NA	NA	NA	NA	NA	1	0	0	4943	NA
MGH-H-201-Breast-TR3142	BRCA	I	77	NA	NA	NA	NA	NA	0	0	1	4973	NA
MGH-H-199-Breast-TR3141	BRCA	II	71	NA	NA	NA	NA	NA	0	1	0	4919	NA
MGH-H-198-Breast-TR3226	BRCA	I	78	NA	NA	NA	NA	NA	1	0	0	4881	NA
MGH-H-196-Breast-TR3162	BRCA	III	60	NA	NA	NA	NA	NA	1	0	0	4828	NA
MGH-H-188-Breast-TR3225	BRCA	II	64	NA	NA	NA	NA	NA	1	0	0	5073	NA
MGH-H-186-Breast-TR3224	BRCA	II	70	NA	NA	NA	NA	NA	0	0	1	4909	NA
MGH-H-147-Breast-TR3182	BRCA	III	40	NA	NA	NA	NA	NA	0	0	1	5007	NA
MGH-H-146-Breast-TR3181	BRCA	II	65	NA	NA	NA	NA	NA	0	1	0	4900	NA
MGH-H-138-Breast-TR3180	BRCA	I	45	NA	NA	NA	NA	NA	1	0	0	5016	NA
MGH-H-136-Breast-TR3179	BRCA	II	43	NA	NA	NA	NA	NA	1	0	0	5040	NA
MGH-H-133-Breast-TR3178	BRCA	I	47	NA	NA	NA	NA	NA	0	1	0	5040	NA
MGH-H-131-Breast-TR3177	BRCA	II	52	NA	NA	NA	NA	NA	1	0	0	4876	NA
MGH-H-104-Breast-TR3176	BRCA	II	66	NA	NA	NA	NA	NA	1	0	0	4644	NA
MGH-H-103-Breast-TR3175	BRCA	II	64	NA	NA	NA	NA	NA	1	0	0	4533	NA
MGH-BrCa-P9-TR700	BRCA	IV	42	NA	NA	NA	NA	NA	0	0	1	5067	NA
MGH-BrCa-P45-TR627	BRCA	IV	55	NA	NA	NA	NA	NA	1	0	0	5023	NA
MGH-BrCa-P43-TR626	BRCA	III	60	NA	NA	NA	NA	NA	1	0	0	4865	NA
MGH-BrCa-P42-TR625	BRCA	IV	63	NA	NA	NA	NA	NA	1	0	0	5001	NA
MGH-BrCa-P3-TR568	BRCA	IV	65	NA	NA	NA	NA	NA	1	0	0	4787	NA
MGH-BrCa-P39-TR623	BRCA	IV	53	NA	NA	NA	NA	NA	0	1	0	5064	NA
MGH-BrCa-P38-TR622	BRCA	IV	67	NA	NA	NA	NA	NA	1	0	0	4835	NA
MGH-BrCa-P37-TR621	BRCA	IV	51	NA	NA	NA	NA	NA	0	1	0	4784	NA
MGH-BrCa-P35-TR620	BRCA	IV	43	NA	NA	NA	NA	NA	1	0	0	4491	NA
MGH-BrCa-P33-TR619	BRCA	IV	59	NA	NA	NA	NA	NA	0	0	1	5087	NA
MGH-BrCa-P32-TR618	BRCA	IV	52	NA	NA	NA	NA	NA	0	1	0	4749	NA
MGH-BrCa-P28-TR499	BRCA	IV	61	NA	NA	NA	NA	NA	0	1	0	5049	NA
MGH-BrCa-P27-TR498	BRCA	IV	53	NA	NA	NA	NA	NA	0	1	0	4743	NA
MGH-BrCa-P25-TR497	BRCA	IV	76	NA	NA	NA	NA	NA	0	0	1	5042	NA
MGH-BrCa-P21-TR614	BRCA	IV	67	NA	NA	NA	NA	NA	0	0	1	5028	NA
MGH-BrCa-P17-TR569	BRCA	IV	61	NA	NA	NA	NA	NA	0	0	1	5029	NA
MGH-BrCa-P16-TR613	BRCA	IV	58	NA	NA	NA	NA	NA	1	0	0	5096	NA
MGH-BrCa-P13-TR704	BRCA	IV	36	NA	NA	NA	NA	NA	0	0	1	5101	NA
MGH-BrCa-P12-TR703	BRCA	IV	43	NA	NA	NA	NA	NA	1	0	0	4972	NA
MGH-BrCa-P11-TR702	BRCA	IV	44	NA	NA	NA	NA	NA	0	1	0	5033	NA
MGH-BrCa-P10-TR701	BRCA	IV	52	NA	NA	NA	NA	NA	0	0	1	4719	NA
MGH-BrCa-K22-TR473	BRCA	IV	68	NA	NA	NA	NA	NA	0	1	0	5083	NA
MGH-BrCa-K16-TR553	BRCA	IV	61	NA	NA	NA	NA	NA	1	0	0	5082	NA
MGH-BrCa-H-80	BRCA	IV	81	NA	NA	NA	NA	NA	0	0	1	5094	NA
MGH-BrCa-H76-TR469	BRCA	na	56	NA	NA	NA	NA	NA	1	0	0	4989	NA
MGH-BrCa-H-75	BRCA	IV	77	NA	NA	NA	NA	NA	0	1	0	4989	NA
MGH-BrCa-H-74	BRCA	I	63	NA	NA	NA	NA	NA	0	0	1	5078	NA
MGH-BrCa-H-68	BRCA	IV	75	NA	NA	NA	NA	NA	0	0	1	4984	NA
MGH-BrCa-H-67	BRCA	IV	58	NA	NA	NA	NA	NA	0	1	0	5021	NA
MGH-BrCa-H-66	BRCA	III	78	NA	NA	NA	NA	NA	0	0	1	5087	NA
MGH-BrCa-H64-TR607	BRCA	IV	66	NA	NA	NA	NA	NA	0	0	1	5045	NA
MGH-BrCa-H63-TR-491	BRCA	I	47	NA	NA	NA	NA	NA	1	0	0	4965	NA
MGH-BrCa-H-59	BRCA	II	51	NA	NA	NA	NA	NA	0	0	1	5023	NA
MGH-BrCa-H57-TR410	BRCA	II	47	NA	NA	NA	NA	NA	0	0	1	4979	NA
MGH-BrCa-H56-TR603	BRCA	II	44	NA	NA	NA	NA	NA	1	0	0	5038	NA
MGH-BrCa-H38-TR467	BRCA	IV	68	NA	NA	NA	NA	NA	0	0	1	5044	NA
MGH-BrCa-H35-TR490	BRCA	IV	77	NA	NA	NA	NA	NA	0	1	0	4647	NA
MGH-BrCa-H128-TR635	BRCA	I	43	NA	NA	NA	NA	NA	1	0	0	4737	NA
MGH-BrCa-H125-TR698	BRCA	II	43	NA	NA	NA	NA	NA	1	0	0	4908	NA
MGH-BrCa-H124-TR697	BRCA	IV	63	NA	NA	NA	NA	NA	0	1	0	5075	NA
MGH-BrCa-H121-TR681	BRCA	I	41	NA	NA	NA	NA	NA	1	0	0	4984	NA
MGH-BrCa-H120-TR680	BRCA	II	58	NA	NA	NA	NA	NA	0	0	1	4535	NA
MGH-BrCa-H119-TR679	BRCA	I	61	NA	NA	NA	NA	NA	0	1	0	4850	NA
MGH-BrCa-H118-TR665	BRCA	II	49	NA	NA	NA	NA	NA	1	0	0	4896	NA
MGH-BrCa-H115-TR662	BRCA	na	50	NA	NA	NA	NA	NA	1	0	0	4948	NA
MGH-BrCa-H114-TR630	BRCA	IV	50	NA	NA	NA	NA	NA	1	0	0	5061	NA
MGH-BrCa-H110-TR851	BRCA	IV	44	NA	NA	NA	NA	NA	0	0	1	4925	NA
MGH-BrCa-H-11	BRCA	IV	66	NA	NA	NA	NA	NA	1	0	0	4506	NA
MGH-BrCa-97-TR1198	BRCA	IV	50	NA	NA	NA	NA	NA	0	1	0	4833	NA
MGH-BrCa-86-TR1197	BRCA	IV	64	NA	NA	NA	NA	NA	0	1	0	4892	NA
MGH-BrCa-85-TR1196	BRCA	IV	65	NA	NA	NA	NA	NA	1	0	0	5025	NA
MGH-BrCa-82-TR1199	BRCA	IV	56	NA	NA	NA	NA	NA	1	0	0	4811	NA
MGH-BrCa-6-TR1200	BRCA	IV	59	NA	NA	NA	NA	NA	0	1	0	4991	NA
MGH-BrCa-61-TR1195	BRCA	IV	69	NA	NA	NA	NA	NA	1	0	0	4967	NA
MGH-BrCa-60-TR1194	BRCA	IV	78	NA	NA	NA	NA	NA	1	0	0	5000	NA
MGH-BrCa-59-TR1192	BRCA	I	52	NA	NA	NA	NA	NA	1	0	0	5044	NA
MGH-BrCa-590-TR1193	BRCA	IV	50	NA	NA	NA	NA	NA	0	0	1	4932	NA
MGH-BrCa-564-TR1191	BRCA	IV	49	NA	NA	NA	NA	NA	0	0	1	5068	NA
MGH-BrCa-55-TR1189	BRCA	II	36	NA	NA	NA	NA	NA	0	0	1	5049	NA
MGH-BrCa-50-TR1179	BRCA	II	56	NA	NA	NA	NA	NA	0	0	1	4991	NA
MGH-BrCa-48-TR1178	BRCA	IV	66	NA	NA	NA	NA	NA	0	1	0	5001	NA
MGH-BrCa-454-TR1188	BRCA	IV	69	NA	NA	NA	NA	NA	0	0	1	5007	NA
MGH-BrCa-42-TR1187	BRCA	IV	60	NA	NA	NA	NA	NA	1	0	0	4777	NA
MGH-BrCa-33-TR1186	BRCA	II	58	NA	NA	NA	NA	NA	0	0	1	5084	NA
MGH-BrCa-21-TR1177	BRCA	IV	53	NA	NA	NA	NA	NA	0	1	0	5007	NA
MGH-BrCa-16-TR1176	BRCA	IV	74	NA	NA	NA	NA	NA	1	0	0	5027	NA
MGH-BrCa-15-TR1175	BRCA	IV	58	NA	NA	NA	NA	NA	1	0	0	3583	NA
MGH-BrCa-10-TR1184	BRCA	IV	59	NA	NA	NA	NA	NA	1	0	0	5002	NA
MGH-BrCA-100-TR1185	BRCA	II	54	NA	NA	NA	NA	NA	0	1	0	5051	NA
MGH-BrCa-08-TR1174	BRCA	IV	60	NA	NA	NA	NA	NA	1	0	0	4958	NA
MGH-BrCa-03-TR1173	BRCA	IV	35	NA	NA	NA	NA	NA	1	0	0	5010	NA
AMC-HD-010-TR1147	asymptomatic control	control	42	NA	NA	NA	NA	NA	0	1	0	4801	NA
AMC-HD-007-TR1145	asymptomatic control	control	30	NA	NA	NA	NA	NA	0	1	0	4863	NA
AMC-HD-006-TR1144	asymptomatic control	control	22	NA	NA	NA	NA	NA	0	1	0	4816	NA
AMC-HD-005-TR1143	asymptomatic control	control	21	NA	NA	NA	NA	NA	0	1	0	4801	NA
AMC-HD-004-TR1142	asymptomatic control	control	21	NA	NA	NA	NA	NA	0	0	1	5007	NA
AMC-HD-003-TR1141	asymptomatic control	control	21	NA	NA	NA	NA	NA	1	0	0	4383	NA
AMC-HD-002-TR1140	asymptomatic control	control	20	NA	NA	NA	NA	NA	1	0	0	4598	NA
