# Supplementary material for: Development of an accurate breast cancer detection classifier based on platelet RNA
Source: Research Square preprint supplement (doi:10.21203/rs.3.rs-4152659/v1), 2024-04-10
Supplement: Supplementary file 4 [file f20de23ce5f64edec8d327ac.xlsx]

## Sheet: Downregulated
Supplementary Table 1. Gene Ontology (BP) of significantly upregulated and downregulated RNAs in TEPs
Downregulated GOs
ID	Description	GeneRatio	BgRatio	pvalue	p.adjust	qvalue	geneID	Count
GO:0002181	cytoplasmic translation	96/1137	159/18614	2.34122e-75	1.12847e-71	9.8824e-72	RPS2/RPS15A/DHX36/HNRNPU/RPL23A/EIF3H/RPS3A/RPL14/EIF3E/RPL24/RPL28/RPL27A/RPS15/EIF3K/RPS13/RPL35/RPS8/RPS28/RPL23/RPS20/RPL15/RPL10/RPS7/RPL37/EIF3A/RPL32/RPL11/RPL37A/HNRNPD/RPL36/RPS24/RPL38/RPL6/RPL10A/RPS9/RPS16/EIF2D/RPS27A/RPL12/RPL5/RPS11/RPS6/RPL21/RPL19/RPL31/EIF3F/DRG2/RPS21/RPL7A/RPL13/EIF3M/RPS25/FAU/RPLP2/RPL18/RPL9/RPL27/RPS12/RPL7/RPL13A/RPS27/UBA52/RPS3/RPL18A/RPS4X/RPL29/RPL8/R…	96
GO:0022613	ribonucleoprotein complex biogenesis	149/1137	475/18614	1.16092e-66	2.79782e-63	2.45015e-63	NOP53/EMG1/LUC7L3/KRR1/SNRPF/NUP88/YTHDC1/PRPF3/NOL8/FBL/C1QBP/MRPL22/RPL23A/EIF3H/SNRPE/LYAR/RPL14/RPP30/SART1/RSL24D1/EIF3E/MTERF4/RPS15/EIF3K/RPL35/RPS8/SNRPC/RPS28/SNRPG/HSP90AA1/DDX27/ERAL1/RPL10/EXOSC1/RPS7/EXOSC5/EIF3A/TRMT112/NOP58/RPL11/PTGES3/SNRPD1/SNRPD2/RPS24/RPL38/RPL6/NSA2/RPS9/RPS16/EIF2D/PIN4/SLU7/DDX18/NHP2/RPL5/EIF4A3/RPS6/ZRSR2/EIF3F/ATM/RPS21/EIF3M/PRKDC/RPS25/LSM6/IMP4/RPL27…	149
GO:0042254	ribosome biogenesis	97/1137	298/18614	6.99682e-45	1.12416e-41	9.84465e-42	NOP53/EMG1/KRR1/NUP88/NOL8/FBL/C1QBP/MRPL22/RPL23A/LYAR/RPL14/RPP30/SART1/RSL24D1/MTERF4/RPS15/RPL35/RPS8/RPS28/DDX27/ERAL1/RPL10/EXOSC1/RPS7/EXOSC5/TRMT112/NOP58/RPL11/RPS24/RPL38/RPL6/NSA2/RPS9/RPS16/PIN4/DDX18/NHP2/RPL5/EIF4A3/RPS6/RPS21/PRKDC/RPS25/LSM6/IMP4/RPL27/EXOSC10/RPS27L/RPL7/DDX56/RPS27/SDAD1/GTF2H5/AATF/C1D/POP4/RPLP0/NOP56/RPS19/RPS14/RIOK1/EXOSC9/RPL35A/DHX29/RPS5/NPM1/TBL3/BRIX1/…	97
GO:0022618	ribonucleoprotein complex assembly	77/1137	231/18614	1.38988e-36	1.67481e-33	1.46669e-33	NOP53/LUC7L3/SNRPF/YTHDC1/PRPF3/RPL23A/EIF3H/SNRPE/SART1/EIF3E/RPS15/EIF3K/SNRPC/RPS28/SNRPG/HSP90AA1/ERAL1/RPL10/EIF3A/RPL11/PTGES3/SNRPD1/SNRPD2/RPL38/RPL6/EIF2D/SLU7/RPL5/ZRSR2/EIF3F/ATM/EIF3M/PRKDC/RPS27L/SART3/CRNKL1/SRSF5/RPL13A/RPS27/DDX23/EIF3L/RPLP0/CPSF6/HSP90AB1/RPS19/PRPF31/RPS14/SNRPA1/DHX29/RPS5/BRIX1/SF3B2/SF3B4/RPSA/SNRPB2/SF3B1/PUF60/EIF2S3/EIF3I/DDX46/CLNS1A/EIF6/RRP7A/RBM5/DDX1…	77
GO:0006364	rRNA processing	74/1137	218/18614	8.42237e-36	8.11917e-33	7.11026e-33	NOP53/EMG1/KRR1/NOL8/FBL/LYAR/RPL14/RPP30/SART1/MTERF4/RPS15/RPL35/RPS8/RPS28/DDX27/EXOSC1/RPS7/EXOSC5/TRMT112/NOP58/RPL11/RPS24/NSA2/RPS16/PIN4/DDX18/NHP2/RPL5/EIF4A3/RPS6/RPS21/PRKDC/RPS25/LSM6/IMP4/RPL27/EXOSC10/RPL7/DDX56/RPS27/GTF2H5/C1D/POP4/NOP56/RPS19/RPS14/RIOK1/EXOSC9/RPL35A/TBL3/BRIX1/PWP1/PA2G4/NSUN5/BMS1/UTP4/WDR75/RPF1/METTL5/EXOSC8/NGDN/DDX49/EIF6/RRP7A/ISG20/DCAF13/UTP18/WDR12/FRG…	74
GO:0071826	ribonucleoprotein complex subunit organization	77/1137	239/18614	2.06827e-35	1.66151e-32	1.45504e-32	NOP53/LUC7L3/SNRPF/YTHDC1/PRPF3/RPL23A/EIF3H/SNRPE/SART1/EIF3E/RPS15/EIF3K/SNRPC/RPS28/SNRPG/HSP90AA1/ERAL1/RPL10/EIF3A/RPL11/PTGES3/SNRPD1/SNRPD2/RPL38/RPL6/EIF2D/SLU7/RPL5/ZRSR2/EIF3F/ATM/EIF3M/PRKDC/RPS27L/SART3/CRNKL1/SRSF5/RPL13A/RPS27/DDX23/EIF3L/RPLP0/CPSF6/HSP90AB1/RPS19/PRPF31/RPS14/SNRPA1/DHX29/RPS5/BRIX1/SF3B2/SF3B4/RPSA/SNRPB2/SF3B1/PUF60/EIF2S3/EIF3I/DDX46/CLNS1A/EIF6/RRP7A/RBM5/DDX1…	77
GO:0016072	rRNA metabolic process	77/1137	257/18614	5.74133e-33	3.95331e-30	3.46206e-30	NOP53/EMG1/KRR1/NOL8/FBL/LYAR/RPL14/RPP30/SART1/MTERF4/RPS15/RPL35/RPS8/RPS28/DDX27/EXOSC1/RPS7/EXOSC5/TRMT112/NOP58/RPL11/RPS24/NSA2/RPS16/PIN4/DDX18/NHP2/RPL5/EIF4A3/RPS6/RPS21/PRKDC/RPS25/LSM6/IMP4/RPL27/EXOSC10/RPL7/DDX56/RPS27/MARS1/GTF2H5/C1D/POP4/NOP56/RPS19/RPS14/RIOK1/EXOSC9/RPL35A/TBL3/BRIX1/PWP1/PA2G4/NSUN5/NCL/BMS1/UTP4/WDR75/RPF1/METTL5/EXOSC8/NGDN/DDX49/EIF6/RRP7A/ISG20/DCAF13/UTP18…	77
GO:0008380	RNA splicing	105/1137	466/18614	1.37566e-32	8.28833e-30	7.2584e-30	SRRM2/CCNL2/TCERG1/CCNL1/ZNF638/LUC7L3/SFPQ/SNRPF/LARP7/YTHDC1/PQBP1/PRPF3/HNRNPU/C1QBP/WBP4/SNRPE/SON/PRPF40A/SART1/TARDBP/RBM6/RPS13/RBM10/SNRPC/RBM8A/KHDRBS1/CDC40/SNRPG/BCAS2/FUS/SNRPD1/DDX39A/SNRPD2/CWC22/RBM22/SLU7/HNRNPM/EIF4A3/ZRSR2/THOC6/PPWD1/LSM6/SRSF11/SART3/IK/CRNKL1/SGF29/TSEN54/HSPA8/SRSF5/ZRANB2/DDX23/LSM5/RNPC3/HNRNPA1/SNRNP40/SRRM1/SUPT20H/PRPF31/SNRPA1/HNRNPH3/PPIG/SF3B2/SLC38A…	105
GO:0006397	mRNA processing	105/1137	500/18614	7.96566e-30	4.26605e-27	3.73594e-27	SRRM2/DHX36/SSU72/TCERG1/LUC7L3/SFPQ/SNRPF/LARP7/YTHDC1/PQBP1/PRPF3/HNRNPU/C1QBP/WBP4/SNRPE/SON/PRPF40A/SART1/TARDBP/RBM6/RBM10/SNRPC/RBM8A/KHDRBS1/CDC40/SNRPG/BCAS2/SNRPD1/DDX39A/SNRPD2/CWC22/RBM22/SLU7/HNRNPM/EIF4A3/ZRSR2/THOC6/SRRT/PPWD1/LSM6/SRSF11/SCAF4/SART3/IK/CRNKL1/TSEN54/HSPA8/SRSF5/ZRANB2/DDX23/LSM5/RNPC3/HNRNPA1/SNRNP40/CPSF6/SRRM1/WDR33/PRPF31/SNRPA1/HNRNPH3/SF3B2/SF3B4/CWC15/SNRPB2/…	105
GO:0000377	RNA splicing, via transesterification reactions with bulged adenosine as nucleophile	82/1137	325/18614	3.27063e-29	1.43313e-26	1.25504e-26	SRRM2/LUC7L3/SFPQ/SNRPF/LARP7/YTHDC1/PQBP1/PRPF3/HNRNPU/C1QBP/WBP4/SNRPE/SON/PRPF40A/SART1/RBM6/RBM10/SNRPC/RBM8A/KHDRBS1/CDC40/SNRPG/BCAS2/SNRPD1/DDX39A/SNRPD2/CWC22/RBM22/SLU7/HNRNPM/EIF4A3/ZRSR2/PPWD1/LSM6/SART3/IK/CRNKL1/HSPA8/SRSF5/DDX23/LSM5/RNPC3/HNRNPA1/SNRNP40/SRRM1/PRPF31/SNRPA1/HNRNPH3/SF3B2/SF3B4/CWC15/SNRPB2/PNN/SF3B1/SRSF7/HNRNPA3/NCL/PUF60/LSM8/HNRNPH1/CIRBP/TRA2B/RBM17/DDX46/RBM25…	82
GO:0000398	mRNA splicing, via spliceosome	82/1137	325/18614	3.27063e-29	1.43313e-26	1.25504e-26	SRRM2/LUC7L3/SFPQ/SNRPF/LARP7/YTHDC1/PQBP1/PRPF3/HNRNPU/C1QBP/WBP4/SNRPE/SON/PRPF40A/SART1/RBM6/RBM10/SNRPC/RBM8A/KHDRBS1/CDC40/SNRPG/BCAS2/SNRPD1/DDX39A/SNRPD2/CWC22/RBM22/SLU7/HNRNPM/EIF4A3/ZRSR2/PPWD1/LSM6/SART3/IK/CRNKL1/HSPA8/SRSF5/DDX23/LSM5/RNPC3/HNRNPA1/SNRNP40/SRRM1/PRPF31/SNRPA1/HNRNPH3/SF3B2/SF3B4/CWC15/SNRPB2/PNN/SF3B1/SRSF7/HNRNPA3/NCL/PUF60/LSM8/HNRNPH1/CIRBP/TRA2B/RBM17/DDX46/RBM25…	82
GO:0000375	RNA splicing, via transesterification reactions	82/1137	329/18614	8.19648e-29	3.29225e-26	2.88315e-26	SRRM2/LUC7L3/SFPQ/SNRPF/LARP7/YTHDC1/PQBP1/PRPF3/HNRNPU/C1QBP/WBP4/SNRPE/SON/PRPF40A/SART1/RBM6/RBM10/SNRPC/RBM8A/KHDRBS1/CDC40/SNRPG/BCAS2/SNRPD1/DDX39A/SNRPD2/CWC22/RBM22/SLU7/HNRNPM/EIF4A3/ZRSR2/PPWD1/LSM6/SART3/IK/CRNKL1/HSPA8/SRSF5/DDX23/LSM5/RNPC3/HNRNPA1/SNRNP40/SRRM1/PRPF31/SNRPA1/HNRNPH3/SF3B2/SF3B4/CWC15/SNRPB2/PNN/SF3B1/SRSF7/HNRNPA3/NCL/PUF60/LSM8/HNRNPH1/CIRBP/TRA2B/RBM17/DDX46/RBM25…	82
GO:0034470	ncRNA processing	93/1137	432/18614	2.43006e-27	9.00992e-25	7.89032e-25	NOP53/DUS1L/EMG1/KRR1/LARP7/ADAT2/NOL8/FBL/LYAR/RPL14/RPP30/SART1/MTERF4/RPS15/HSD17B10/RPL35/RPS8/RPS28/DDX27/EXOSC1/RPS7/EXOSC5/ELP2/TRMT112/NOP58/RPL11/RPS24/NSA2/RPS16/INTS4/PIN4/DDX18/NHP2/RPL5/EIF4A3/SSB/RPS6/THUMPD1/SRRT/RPS21/PRKDC/INTS8/RPS25/LSM6/MTO1/IMP4/RPL27/TUT4/EXOSC10/RPL7/TSEN54/DDX56/RPS27/GTF2H5/C1D/POP4/NOP56/RPS19/RPS14/RIOK1/EXOSC9/RPL35A/TBL3/BRIX1/PWP1/PA2G4/SARS1/NSUN5/T…	93
GO:0042274	ribosomal small subunit biogenesis	32/1137	78/18614	4.75057e-19	1.63555e-16	1.43231e-16	EMG1/RPS15/RPS8/RPS28/ERAL1/RPS7/RPS24/RPL38/RPS9/RPS16/RPS6/RPS21/PRKDC/RPS25/LSM6/IMP4/RPS27L/RPS27/GTF2H5/RPS19/RPS14/RIOK1/RPS5/NPM1/TBL3/RPSA/BMS1/UTP4/NGDN/RRP7A/DCAF13/KRI1	32
GO:0042255	ribosome assembly	28/1137	60/18614	1.14971e-18	3.69439e-16	3.23532e-16	NOP53/C1QBP/MRPL22/RPL23A/MTERF4/RPS15/RPS28/ERAL1/RPL10/RPL11/RPL38/RPL6/RPL5/PRKDC/RPS27L/RPS27/RPLP0/RPS19/RPS14/DHX29/RPS5/NPM1/BRIX1/RPSA/EIF2A/EIF6/RRP7A/DHX30	28
GO:0043484	regulation of RNA splicing	46/1137	182/18614	6.15487e-17	1.80137e-14	1.57752e-14	CCNL2/CCNL1/ZNF638/LARP7/YTHDC1/PQBP1/HNRNPU/C1QBP/SON/RPS13/RBM10/RBM8A/KHDRBS1/FUS/CWC22/RBM22/SGF29/HSPA8/SRSF5/HNRNPA1/SRRM1/SUPT20H/HNRNPH3/SLC38A2/SF3B4/FASTK/SRSF7/NCL/PUF60/HNRNPH1/CIRBP/TRA2B/RBM25/CLNS1A/RBM5/TAF12/RPS26/SNRNP70/ENY2/RBMX/CELF1/CLK1/DDX5/SRPK2/SRSF9/FXR1	46
GO:0006403	RNA localization	48/1137	197/18614	6.35337e-17	1.80137e-14	1.57752e-14	DHX36/NUP205/CHTOP/NUP88/YTHDC1/HNRNPU/FBL/RBM8A/KHDRBS1/NOP58/DDX39A/TPR/NUP210/NHP2/EIF4A3/SSB/KPNB1/THOC6/ATM/EXOSC10/NUP133/TOMM20/CCT3/NUP85/HNRNPA1/NUP107/CPSF6/NXF1/CCT6A/NPM1/SEC13/SRSF7/NUP54/HNRNPA3/RAE1/CCT8/CCT7/DHX9/UPF1/MVP/NUTF2/ENY2/RAN/CCT4/CCT5/PIH1D1/GLE1/RUVBL1	48
GO:0009060	aerobic respiration	45/1137	196/18614	6.41496e-15	1.68933e-12	1.47941e-12	NOP53/SUCLG2/ATP5PO/UQCRB/MRPS36/COX7C/NDUFAB1/NDUFV1/SUCLG1/ATP5PB/COX6C/ATP5MF/COX5B/NDUFB10/NDUFB2/SDHC/NDUFA12/ATP5PD/SURF1/COX5A/IDH3B/NDUFB11/COX7B/CYC1/UQCRQ/NIPSNAP2/PDHA1/COX4I1/NDUFS2/NDUFB4/MDH1/NDUFC1/MDH2/NDUFS6/FH/NDUFB6/UQCRC2/ATP5F1A/SIRT3/CHCHD2/PDHB/ATP5F1C/NDUFA3/ATP5F1D/UQCRC1	45
GO:0006413	translational initiation	35/1137	123/18614	6.65919e-15	1.68933e-12	1.47941e-12	EIF4E2/EIF3H/RPS3A/EIF3E/EIF3K/KHDRBS1/EIF3A/EIF2B1/TPR/EIF2B4/EIF2D/EIF3F/EIF3M/RPL13A/RPS3/EIF3L/EIF2B2/DHX29/RPS5/NPM1/EIF4A2/MTIF3/MIF4GD/EIF2S3/EIF3I/ABCE1/EIF2AK2/EIF2A/EIF6/DDX1/PPP1CA/EIF3G/EIF4EBP1/EIF3D/EIF2S1	35
GO:0045333	cellular respiration	50/1137	243/18614	2.10907e-14	5.08285e-12	4.45124e-12	NOP53/SUCLG2/ATP5PO/UQCRB/MRPS36/COX7C/NDUFAB1/NDUFV1/SUCLG1/ATP5PB/CHCHD5/COX6C/ATP5MF/COX5B/NDUFB10/NDUFB2/IFNAR1/SDHC/NDUFA12/ATP5PD/SURF1/COX5A/IDH3B/NDUFB11/COX7B/CYC1/UQCRQ/NIPSNAP2/PDHA1/COX4I1/NDUFS2/NDUFB4/PRELID1/MDH1/NDUFC1/MDH2/ETFRF1/NDUFS6/PUM2/FH/NDUFB6/UQCRC2/ATP5F1A/SIRT3/CHCHD2/PDHB/ATP5F1C/NDUFA3/ATP5F1D/UQCRC1	50
GO:0050851	antigen receptor-mediated signaling pathway	41/1137	201/18614	6.31599e-12	1.44967e-09	1.26953e-09	CD3D/TRBC1/TRAC/KHDRBS1/CD3E/TXK/EIF2B1/CD79A/ADA/PTPRC/SKAP1/TRBC2/EIF2B4/HLA-DRB1/RPS3/HLA-DPB1/EIF2B2/PRKCH/PRAM1/LPXN/EZR/NFKB1/PRKD2/LYN/IGHM/MS4A1/IGHD/PHPT1/CD22/ITK/GBP1/MAP3K7/BLNK/CD300A/SPG21/RIPK2/HLA-DQB1/LCK/BAX/PTPN2/WNK1	41
GO:0006913	nucleocytoplasmic transport	55/1137	328/18614	7.06193e-12	1.47994e-09	1.29603e-09	NUP205/DMAP1/APPL1/CHTOP/NUP88/YTHDC1/KPNA1/TARDBP/RPS15/RBM8A/KHDRBS1/RPL23/HSP90AA1/DDX39A/TPR/TRIM28/RBM22/NUP210/EIF4A3/SSB/KPNB1/THOC6/UBR5/PHB2/SDAD1/NUP133/NUP85/HNRNPA1/NUP107/CPSF6/NXF1/HSPA9/WASHC4/NPM1/SEC13/PPP1R10/HIKESHI/NUP54/ABCE1/RAE1/PRKACA/EIF6/RANBP3/CHP1/DHX9/UPF1/NUTF2/ENY2/RAN/SPG11/AKAP13/BARD1/PRKCD/GLE1/NOLC1	55
GO:0051169	nuclear transport	55/1137	328/18614	7.06193e-12	1.47994e-09	1.29603e-09	NUP205/DMAP1/APPL1/CHTOP/NUP88/YTHDC1/KPNA1/TARDBP/RPS15/RBM8A/KHDRBS1/RPL23/HSP90AA1/DDX39A/TPR/TRIM28/RBM22/NUP210/EIF4A3/SSB/KPNB1/THOC6/UBR5/PHB2/SDAD1/NUP133/NUP85/HNRNPA1/NUP107/CPSF6/NXF1/HSPA9/WASHC4/NPM1/SEC13/PPP1R10/HIKESHI/NUP54/ABCE1/RAE1/PRKACA/EIF6/RANBP3/CHP1/DHX9/UPF1/NUTF2/ENY2/RAN/SPG11/AKAP13/BARD1/PRKCD/GLE1/NOLC1	55
GO:0002429	immune response-activating cell surface receptor signaling pathway	52/1137	302/18614	9.52627e-12	1.90995e-09	1.67261e-09	APPL1/CYBA/CD3D/TRBC1/TRAC/KHDRBS1/CD3E/TXK/EIF2B1/CD79A/ADA/PTPRC/SKAP1/TRBC2/EIF2B4/HLA-DRB1/OAS1/RPS3/HLA-DPB1/VAV1/PAK2/EIF2B2/PRKCH/PRAM1/LPXN/IFI35/EZR/NFKB1/PRKD2/LYN/IGHM/MS4A1/IGHD/PHPT1/TYROBP/CD22/ITK/GBP1/MAP3K7/BLNK/CD300A/RABGEF1/PAK1/SPG21/RIPK2/HLA-DQB1/LCK/BAX/PLSCR1/PRKCD/PTPN2/WNK1	52
GO:0050684	regulation of mRNA processing	33/1137	139/18614	9.90637e-12	1.90995e-09	1.67261e-09	DHX36/LARP7/YTHDC1/HNRNPU/C1QBP/SON/RBM10/RBM8A/KHDRBS1/CWC22/HSPA8/HNRNPA1/CPSF6/SRRM1/SF3B4/SRSF7/NCL/PUF60/CIRBP/TRA2B/RBM25/CLNS1A/RBM5/DHX9/SNRNP70/SAFB/RBMX/CELF1/BARD1/DDX5/SRPK2/SRSF9/FXR1	33
GO:0002253	activation of immune response	71/1137	495/18614	1.40905e-11	2.61216e-09	2.28756e-09	NOP53/APPL1/CYBA/SFPQ/ZNFX1/CD3D/PQBP1/C1QBP/TRBC1/TRAC/RPS6KA3/KHDRBS1/CD3E/HSP90AA1/TXK/EIF2B1/CD79A/ADA/PTPRC/SKAP1/TRBC2/EIF2B4/PRKDC/HLA-DRB1/NLRP1/OAS1/PHB2/RPS3/HLA-DPB1/VAV1/PAK2/EIF2B2/PRKCH/IFI16/PRAM1/LPXN/IFI35/EZR/NFKB1/PRKD2/HSPD1/LYN/IGHM/MS4A1/PYHIN1/IGHD/PHPT1/TYROBP/CD22/ITK/PUM2/GBP1/MAP3K7/BLNK/CD300A/RABGEF1/CASP1/PHB1/PAK1/SPG21/RIPK2/CYLD/HLA-DQB1/LCK/BAX/PLSCR1/ANKRD17/PRK…	71
GO:0051168	nuclear export	36/1137	166/18614	1.92604e-11	3.43834e-09	3.01108e-09	CHTOP/NUP88/YTHDC1/RPS15/RBM8A/KHDRBS1/DDX39A/TPR/RBM22/EIF4A3/SSB/THOC6/SDAD1/NUP133/NUP85/HNRNPA1/NUP107/CPSF6/NXF1/HSPA9/WASHC4/NPM1/ABCE1/RAE1/PRKACA/EIF6/RANBP3/CHP1/DHX9/UPF1/NUTF2/ENY2/RAN/AKAP13/BARD1/GLE1	36
GO:0015980	energy derivation by oxidation of organic compounds	55/1137	337/18614	2.10101e-11	3.61674e-09	3.16732e-09	NOP53/SUCLG2/ATP5PO/UQCRB/MRPS36/COX7C/NDUFAB1/NDUFV1/GBE1/SUCLG1/ATP5PB/CHCHD5/COX6C/ATP5MF/COX5B/NDUFB10/PTGES3/NDUFB2/IFNAR1/SDHC/NDUFA12/ATP5PD/SURF1/COX5A/IDH3B/NDUFB11/COX7B/CYC1/UQCRQ/NIPSNAP2/PDHA1/COX4I1/NDUFS2/NDUFB4/PRELID1/MDH1/NDUFC1/MDH2/ETFRF1/NDUFS6/PUM2/FH/PPP1CA/NDUFB6/UQCRC2/PPP1R2/ATP5F1A/SIRT3/CHCHD2/PDHB/ATP5F1C/NDUFA3/RUBCNL/ATP5F1D/UQCRC1	55
GO:0048024	regulation of mRNA splicing, via spliceosome	28/1137	108/18614	3.91884e-11	6.43984e-09	5.63961e-09	LARP7/YTHDC1/HNRNPU/C1QBP/SON/RBM10/RBM8A/KHDRBS1/CWC22/HSPA8/HNRNPA1/SRRM1/SF3B4/SRSF7/NCL/PUF60/CIRBP/TRA2B/RBM25/CLNS1A/RBM5/SNRNP70/RBMX/CELF1/DDX5/SRPK2/SRSF9/FXR1	28
GO:0000245	spliceosomal complex assembly	26/1137	94/18614	4.0234e-11	6.43984e-09	5.63961e-09	LUC7L3/SNRPF/YTHDC1/SNRPE/SNRPC/SNRPG/SNRPD1/SNRPD2/SLU7/ZRSR2/CRNKL1/SRSF5/DDX23/SNRPA1/SF3B2/SF3B4/SNRPB2/SF3B1/PUF60/DDX46/RBM5/DDX1/SNRNP200/CELF1/SRPK2/SRSF9	26
GO:0002757	immune response-activating signaling pathway	63/1137	423/18614	4.14181e-11	6.43984e-09	5.63961e-09	NOP53/APPL1/CYBA/CD3D/C1QBP/TRBC1/TRAC/RPS6KA3/KHDRBS1/CD3E/TXK/EIF2B1/CD79A/ADA/PTPRC/SKAP1/TRBC2/EIF2B4/HLA-DRB1/NLRP1/OAS1/PHB2/RPS3/HLA-DPB1/VAV1/PAK2/EIF2B2/PRKCH/PRAM1/LPXN/IFI35/EZR/NFKB1/PRKD2/HSPD1/LYN/IGHM/MS4A1/IGHD/PHPT1/TYROBP/CD22/ITK/PUM2/GBP1/MAP3K7/BLNK/CD300A/RABGEF1/CASP1/PHB1/PAK1/SPG21/RIPK2/CYLD/HLA-DQB1/LCK/BAX/PLSCR1/ANKRD17/PRKCD/PTPN2/WNK1	63
GO:0042273	ribosomal large subunit biogenesis	22/1137	69/18614	5.92881e-11	8.83918e-09	7.7408e-09	NOP53/RPL23A/RPL14/RSL24D1/RPL35/RPL10/RPL11/RPL38/RPL6/NSA2/DDX18/RPL5/RPL7/SDAD1/RPLP0/RPL35A/NPM1/BRIX1/RPF1/EIF6/WDR12/DHX30	22
GO:0006119	oxidative phosphorylation	33/1137	148/18614	6.05172e-11	8.83918e-09	7.7408e-09	ATP5PO/UQCRB/COX7C/NDUFAB1/NDUFV1/ATP5PB/COX6C/ATP5MF/COX5B/NDUFB10/NDUFB2/SDHC/NDUFA12/ATP5PD/COX5A/NDUFB11/COX7B/CYC1/UQCRQ/NIPSNAP2/COX4I1/NDUFS2/NDUFB4/NDUFC1/NDUFS6/NDUFB6/UQCRC2/ATP5F1A/CHCHD2/ATP5F1C/NDUFA3/ATP5F1D/UQCRC1	33
GO:0015986	proton motive force-driven ATP synthesis	23/1137	76/18614	7.20909e-11	1.02199e-08	8.94999e-09	ATP5PO/NDUFAB1/NDUFV1/ATP5MC2/ATP5PB/ATP5MF/NDUFB10/NDUFB2/SDHC/NDUFA12/ATP5PD/ATP5MC1/NDUFB11/NDUFS2/NDUFB4/NDUFC1/NDUFS6/NDUFB6/ATP5F1A/ATP5MC3/ATP5F1C/NDUFA3/ATP5F1D	23
GO:1903311	regulation of mRNA metabolic process	53/1137	329/18614	8.04292e-11	1.10763e-08	9.69989e-09	DHX36/VIM/LARP7/YTHDC1/HNRNPU/C1QBP/CNOT2/SON/TARDBP/RBM10/RBM8A/KHDRBS1/EXOSC5/FUS/HNRNPD/CWC22/EIF4A3/TUT4/HSPA8/PABPC4/HNRNPA1/CPSF6/SRRM1/EXOSC9/NPM1/SF3B4/FASTK/CNOT7/SRSF7/NCL/PUF60/CIRBP/TRA2B/EXOSC8/RBM25/CLNS1A/PUM2/RBM5/MLH1/DHX9/UPF1/APEX1/SNRNP70/SAFB/RBMX/CNOT1/CELF1/BARD1/PRKCD/DDX5/SRPK2/SRSF9/FXR1	53
GO:0000028	ribosomal small subunit assembly	12/1137	19/18614	8.61298e-11	1.15318e-08	1.00988e-08	RPS15/RPS28/ERAL1/RPL38/PRKDC/RPS27L/RPS27/RPS19/RPS14/RPS5/RPSA/RRP7A	12
GO:0002183	cytoplasmic translational initiation	16/1137	38/18614	2.09713e-10	2.69128e-08	2.35685e-08	EIF3H/EIF3E/EIF3K/EIF3A/EIF2D/EIF3F/EIF3M/RPL13A/EIF3L/DHX29/EIF4A2/MIF4GD/EIF2S3/EIF3I/EIF3G/EIF3D	16
GO:0051236	establishment of RNA localization	34/1137	163/18614	2.12175e-10	2.69128e-08	2.35685e-08	NUP205/CHTOP/NUP88/YTHDC1/RBM8A/KHDRBS1/DDX39A/TPR/NUP210/EIF4A3/SSB/KPNB1/THOC6/ATM/NUP133/TOMM20/NUP85/HNRNPA1/NUP107/CPSF6/NXF1/NPM1/SEC13/SRSF7/NUP54/HNRNPA3/RAE1/DHX9/UPF1/MVP/NUTF2/ENY2/RAN/GLE1	34
GO:0002768	immune response-regulating cell surface receptor signaling pathway	52/1137	329/18614	2.4663e-10	3.04809e-08	2.66933e-08	APPL1/CYBA/CD3D/TRBC1/TRAC/KHDRBS1/CD3E/TXK/EIF2B1/CD79A/ADA/PTPRC/SKAP1/TRBC2/EIF2B4/HLA-DRB1/OAS1/RPS3/HLA-DPB1/VAV1/PAK2/EIF2B2/PRKCH/PRAM1/LPXN/IFI35/EZR/NFKB1/PRKD2/LYN/IGHM/MS4A1/IGHD/PHPT1/TYROBP/CD22/ITK/GBP1/MAP3K7/BLNK/CD300A/RABGEF1/PAK1/SPG21/RIPK2/HLA-DQB1/LCK/BAX/PLSCR1/PRKCD/PTPN2/WNK1	52
GO:0072594	establishment of protein localization to organelle	64/1137	453/18614	2.77818e-10	3.34771e-08	2.93171e-08	PDCD5/SRP68/DMAP1/APPL1/NUP88/UBE2D3/KPNA1/TARDBP/MTERF4/TOMM7/RPL23/HSP90AA1/SEC63/HAX1/TPR/TRIM28/RBM22/SPIDR/KPNB1/SEC61G/UBR5/SGF29/HSPA8/PHB2/NUP133/TOMM20/CCT3/NUP85/NUP107/CCT6A/PEX16/TIMM17A/SEC13/PPP1R10/DNAJC19/HSPD1/AIP/HIKESHI/SAMM50/TIMM22/NUP54/SPCS3/TOMM22/PMPCB/ATP5IF1/GNPTAB/LONP2/CHP1/CCT8/CCT7/TIMM23/NUTF2/RAN/CCT4/SPG11/BAX/TIMM50/CCT5/PRKCD/GZMB/SEC61B/PIH1D1/DNAJA1/NOLC1	64
GO:0050657	nucleic acid transport	33/1137	160/18614	5.32004e-10	6.10538e-08	5.34671e-08	NUP205/CHTOP/NUP88/YTHDC1/RBM8A/KHDRBS1/DDX39A/TPR/NUP210/EIF4A3/SSB/KPNB1/THOC6/NUP133/TOMM20/NUP85/HNRNPA1/NUP107/CPSF6/NXF1/NPM1/SEC13/SRSF7/NUP54/HNRNPA3/RAE1/DHX9/UPF1/MVP/NUTF2/ENY2/RAN/GLE1	33
GO:0050658	RNA transport	33/1137	160/18614	5.32004e-10	6.10538e-08	5.34671e-08	NUP205/CHTOP/NUP88/YTHDC1/RBM8A/KHDRBS1/DDX39A/TPR/NUP210/EIF4A3/SSB/KPNB1/THOC6/NUP133/TOMM20/NUP85/HNRNPA1/NUP107/CPSF6/NXF1/NPM1/SEC13/SRSF7/NUP54/HNRNPA3/RAE1/DHX9/UPF1/MVP/NUTF2/ENY2/RAN/GLE1	33
GO:0002764	immune response-regulating signaling pathway	63/1137	450/18614	5.58753e-10	6.26323e-08	5.48494e-08	NOP53/APPL1/CYBA/CD3D/C1QBP/TRBC1/TRAC/RPS6KA3/KHDRBS1/CD3E/TXK/EIF2B1/CD79A/ADA/PTPRC/SKAP1/TRBC2/EIF2B4/HLA-DRB1/NLRP1/OAS1/PHB2/RPS3/HLA-DPB1/VAV1/PAK2/EIF2B2/PRKCH/PRAM1/LPXN/IFI35/EZR/NFKB1/PRKD2/HSPD1/LYN/IGHM/MS4A1/IGHD/PHPT1/TYROBP/CD22/ITK/PUM2/GBP1/MAP3K7/BLNK/CD300A/RABGEF1/CASP1/PHB1/PAK1/SPG21/RIPK2/CYLD/HLA-DQB1/LCK/BAX/PLSCR1/ANKRD17/PRKCD/PTPN2/WNK1	63
GO:0034504	protein localization to nucleus	48/1137	304/18614	1.25376e-09	1.37344e-07	1.20277e-07	NOP53/DMAP1/APPL1/LARP7/NUP88/HNRNPU/NOL8/KPNA1/TARDBP/ABCA7/RPL23/HSP90AA1/RPL11/TPR/TRIM28/RBM22/KPNB1/UBR5/PHB2/NUP133/CCT3/NUP85/NUP107/CCT6A/SUN2/SEC13/PPP1R10/HIKESHI/NUP54/PYHIN1/RRP7A/CHP1/CCT8/CCT7/PARP1/NUTF2/SYNE1/RAN/CCT4/SPG11/KAT7/BARD1/CCT5/PRKCD/PLRG1/TRIM8/GBP2/NOLC1	48
GO:0042776	proton motive force-driven mitochondrial ATP synthesis	20/1137	67/18614	1.63407e-09	1.75027e-07	1.53278e-07	ATP5PO/NDUFAB1/NDUFV1/ATP5PB/ATP5MF/NDUFB10/NDUFB2/SDHC/NDUFA12/ATP5PD/NDUFB11/NDUFS2/NDUFB4/NDUFC1/NDUFS6/NDUFB6/ATP5F1A/ATP5F1C/NDUFA3/ATP5F1D	20
GO:0140694	non-membrane-bounded organelle assembly	56/1137	390/18614	2.01836e-09	2.11489e-07	1.85209e-07	NOP53/CHMP2B/HNRNPU/C1QBP/MRPL22/RPL23A/CNOT2/MTERF4/BCCIP/RPS15/G3BP1/RPS28/ERAL1/RPL10/RPL11/HAUS1/TPR/RPL38/RPL6/RPL5/KPNB1/CHMP7/PRKDC/PRRC2C/RPS27L/RPS27/RPS3/CENPC/DRG1/RPLP0/RPS19/RPS14/DHX29/RPS5/RPS23/NPM1/BRIX1/EZR/RPSA/AUP1/RNF213/CNOT7/SEPTIN1/CIRBP/EIF2A/DYNC1H1/EIF6/RRP7A/PUM2/TUBGCP2/MLH1/AKAP13/CNOT1/EIF2S1/DHX30/CCDC69	56
GO:0006405	RNA export from nucleus	23/1137	90/18614	2.91985e-09	2.99439e-07	2.6223e-07	CHTOP/NUP88/YTHDC1/RBM8A/KHDRBS1/DDX39A/TPR/EIF4A3/SSB/THOC6/NUP133/NUP85/HNRNPA1/NUP107/CPSF6/NXF1/NPM1/RAE1/DHX9/UPF1/ENY2/RAN/GLE1	23
GO:0001732	formation of cytoplasmic translation initiation complex	10/1137	16/18614	3.9729e-09	3.98945e-07	3.49371e-07	EIF3H/EIF3E/EIF3K/EIF3A/EIF3F/EIF3M/EIF3L/EIF3I/EIF3G/EIF3D	10
GO:0009201	ribonucleoside triphosphate biosynthetic process	27/1137	123/18614	4.74024e-09	4.66284e-07	4.08343e-07	ATP5PO/NDUFAB1/NDUFV1/ATP5MC2/ATP5PB/ATP5MF/NDUFB10/NDUFB2/SDHC/NDUFA12/ATP5PD/IMPDH2/ATP5MC1/UCKL1/NDUFB11/NME7/NDUFS2/NDUFB4/NDUFC1/NDUFS6/PARP1/NDUFB6/ATP5F1A/ATP5MC3/ATP5F1C/NDUFA3/ATP5F1D	27
GO:0050852	T cell receptor signaling pathway	29/1137	140/18614	5.29793e-09	5.1072e-07	4.47257e-07	CD3D/TRBC1/TRAC/KHDRBS1/CD3E/TXK/EIF2B1/ADA/PTPRC/SKAP1/TRBC2/EIF2B4/HLA-DRB1/RPS3/HLA-DPB1/EIF2B2/PRAM1/EZR/PRKD2/PHPT1/ITK/GBP1/MAP3K7/CD300A/RIPK2/HLA-DQB1/LCK/PTPN2/WNK1	29
GO:0006401	RNA catabolic process	48/1137	319/18614	6.30413e-09	5.95802e-07	5.21766e-07	DHX36/VIM/RNASEH2B/HNRNPU/CNOT2/EIF3E/TARDBP/GAS5/RBM10/RBM8A/EXOSC1/EXOSC5/FUS/SKIC3/HNRNPD/EIF4A3/SSB/ATM/LSM6/SLIRP/TUT4/EXOSC10/LSM5/PABPC4/SKIC2/EXOSC9/NPM1/FASTK/CNOT7/RNASET2/CIRBP/EXOSC8/DDX49/PUM2/ISG20/MLH1/DHX9/UPF1/APEX1/DICER1/CNOT1/CELF1/PRKCD/DDX5/ZCCHC7/TENT2/XRN2/FXR1	48
GO:0009206	purine ribonucleoside triphosphate biosynthetic process	26/1137	117/18614	6.92959e-09	6.4232e-07	5.62503e-07	ATP5PO/NDUFAB1/NDUFV1/ATP5MC2/ATP5PB/ATP5MF/NDUFB10/NDUFB2/SDHC/NDUFA12/ATP5PD/IMPDH2/ATP5MC1/NDUFB11/NME7/NDUFS2/NDUFB4/NDUFC1/NDUFS6/PARP1/NDUFB6/ATP5F1A/ATP5MC3/ATP5F1C/NDUFA3/ATP5F1D	26
GO:0042773	ATP synthesis coupled electron transport	24/1137	102/18614	7.90834e-09	7.05892e-07	6.18176e-07	UQCRB/COX7C/NDUFAB1/NDUFV1/COX6C/COX5B/NDUFB10/NDUFB2/SDHC/NDUFA12/COX5A/COX7B/CYC1/UQCRQ/COX4I1/NDUFS2/NDUFB4/NDUFC1/NDUFS6/NDUFB6/UQCRC2/CHCHD2/NDUFA3/UQCRC1	24
GO:0042775	mitochondrial ATP synthesis coupled electron transport	24/1137	102/18614	7.90834e-09	7.05892e-07	6.18176e-07	UQCRB/COX7C/NDUFAB1/NDUFV1/COX6C/COX5B/NDUFB10/NDUFB2/SDHC/NDUFA12/COX5A/COX7B/CYC1/UQCRQ/COX4I1/NDUFS2/NDUFB4/NDUFC1/NDUFS6/NDUFB6/UQCRC2/CHCHD2/NDUFA3/UQCRC1	24
GO:0009145	purine nucleoside triphosphate biosynthetic process	26/1137	118/18614	8.3788e-09	7.34288e-07	6.43043e-07	ATP5PO/NDUFAB1/NDUFV1/ATP5MC2/ATP5PB/ATP5MF/NDUFB10/NDUFB2/SDHC/NDUFA12/ATP5PD/IMPDH2/ATP5MC1/NDUFB11/NME7/NDUFS2/NDUFB4/NDUFC1/NDUFS6/PARP1/NDUFB6/ATP5F1A/ATP5MC3/ATP5F1C/NDUFA3/ATP5F1D	26
GO:0032204	regulation of telomere maintenance	24/1137	104/18614	1.19152e-08	1.02556e-06	8.98117e-07	DHX36/HNRNPU/NSMCE1/UCHL5/HNRNPD/ATRX/ATM/EXOSC10/NSMCE4A/CCT3/TNKS2/HNRNPA1/CCT6A/PPP1R10/NBN/CCT8/CCT7/GNL3/USP7/UPF1/PARP1/CCT4/CCT5/RUVBL1	24
GO:0009152	purine ribonucleotide biosynthetic process	37/1137	217/18614	1.23281e-08	1.04248e-06	9.12942e-07	ATP5PO/GMPS/NDUFAB1/NDUFV1/ATP5MC2/ATP5PB/ATP5MF/NDUFB10/NDUFB2/ADA/SDHC/NDUFA12/ATP5PD/IMPDH2/ATP5MC1/NDUFB11/APRT/PDHA1/NME7/NDUFS2/NDUFB4/NDUFC1/GART/COASY/NDUFS6/ACSL5/ATIC/PARP1/NDUFB6/ATP5F1A/ATP5MC3/ACSS1/PDHB/ATP5F1C/NDUFA3/ATP5F1D/PANK4	37
GO:0046390	ribose phosphate biosynthetic process	39/1137	238/18614	1.56514e-08	1.30068e-06	1.13906e-06	ATP5PO/GMPS/NDUFAB1/NDUFV1/ATP5MC2/ATP5PB/ATP5MF/NDUFB10/NDUFB2/ADA/PRPSAP2/SDHC/NDUFA12/ATP5PD/IMPDH2/ATP5MC1/UCKL1/NDUFB11/APRT/PDHA1/NME7/NDUFS2/NDUFB4/NDUFC1/GART/COASY/NDUFS6/ACSL5/ATIC/PARP1/NDUFB6/ATP5F1A/ATP5MC3/ACSS1/PDHB/ATP5F1C/NDUFA3/ATP5F1D/PANK4	39
GO:0006754	ATP biosynthetic process	24/1137	106/18614	1.77488e-08	1.43077e-06	1.25298e-06	ATP5PO/NDUFAB1/NDUFV1/ATP5MC2/ATP5PB/ATP5MF/NDUFB10/NDUFB2/SDHC/NDUFA12/ATP5PD/ATP5MC1/NDUFB11/NDUFS2/NDUFB4/NDUFC1/NDUFS6/PARP1/NDUFB6/ATP5F1A/ATP5MC3/ATP5F1C/NDUFA3/ATP5F1D	24
GO:0000723	telomere maintenance	30/1137	156/18614	1.78104e-08	1.43077e-06	1.25298e-06	DHX36/HNRNPU/NSMCE1/HSP90AA1/UCHL5/PTGES3/HNRNPD/NHP2/ATRX/ATM/PRKDC/EXOSC10/NSMCE4A/CCT3/TNKS2/HNRNPA1/HSP90AB1/CCT6A/PPP1R10/NBN/CCT8/CCT7/GNL3/USP7/UPF1/APEX1/PARP1/CCT4/CCT5/RUVBL1	30
GO:0033044	regulation of chromosome organization	40/1137	250/18614	2.04435e-08	1.61537e-06	1.41464e-06	PHF10/DHX36/SUB1/DYNC1LI1/HNRNPU/MPHOSPH8/SMC2/PSMG2/NSMCE1/UCHL5/HNRNPD/TPR/SSBP1/TRIM28/ATRX/ATM/SMARCD2/EXOSC10/IK/NSMCE4A/ANAPC11/CCT3/TNKS2/HNRNPA1/SMARCC2/CCT6A/PPP1R10/NBN/ANAPC4/SMC4/CCT8/CCT7/GNL3/USP7/UPF1/PARP1/PPHLN1/CCT4/CCT5/RUVBL1	40
GO:0009260	ribonucleotide biosynthetic process	38/1137	231/18614	2.14431e-08	1.66703e-06	1.45988e-06	ATP5PO/GMPS/NDUFAB1/NDUFV1/ATP5MC2/ATP5PB/ATP5MF/NDUFB10/NDUFB2/ADA/SDHC/NDUFA12/ATP5PD/IMPDH2/ATP5MC1/UCKL1/NDUFB11/APRT/PDHA1/NME7/NDUFS2/NDUFB4/NDUFC1/GART/COASY/NDUFS6/ACSL5/ATIC/PARP1/NDUFB6/ATP5F1A/ATP5MC3/ACSS1/PDHB/ATP5F1C/NDUFA3/ATP5F1D/PANK4	38
GO:0022904	respiratory electron transport chain	26/1137	124/18614	2.49518e-08	1.90901e-06	1.67179e-06	UQCRB/COX7C/NDUFAB1/NDUFV1/COX6C/COX5B/NDUFB10/NDUFB2/SDHC/NDUFA12/COX5A/COX7B/CYC1/UQCRQ/COX4I1/NDUFS2/NDUFB4/NDUFC1/ETFRF1/NDUFS6/PUM2/NDUFB6/UQCRC2/CHCHD2/NDUFA3/UQCRC1	26
GO:0045727	positive regulation of translation	28/1137	141/18614	2.56074e-08	1.92856e-06	1.68891e-06	DHX36/VIM/HNRNPU/C1QBP/EIF3E/KHDRBS1/HNRNPD/RPL5/EIF4A3/SSB/PRKDC/RPS27L/SERP1/RPS4X/EIF5A/DHX29/NPM1/NSUN5/MIF4GD/CIRBP/USP16/METTL5/EIF6/DHX9/EIF3D/RPUSD3/EEF2/FXR1	28
GO:0006164	purine nucleotide biosynthetic process	41/1137	262/18614	2.60367e-08	1.93072e-06	1.6908e-06	ATP5PO/GMPS/NADK2/NDUFAB1/NDUFV1/ATP5MC2/ATP5PB/ATP5MF/NDUFB10/NDUFB2/ADA/PRPSAP2/SDHC/NDUFA12/ATP5PD/IMPDH2/ATP5MC1/NDUFB11/APRT/PDHA1/NME7/KYNU/NDUFS2/NDUFB4/NDUFC1/GART/COASY/NDUFS6/ACSL5/ATIC/PARP1/NDUFB6/ATP5F1A/ATP5MC3/ACSS1/PDHB/ATP5F1C/NDUFA3/ATP5F1D/PANK4/NADSYN1	41
GO:0051054	positive regulation of DNA metabolic process	45/1137	303/18614	2.80031e-08	2.03978e-06	1.78631e-06	PHF10/DHX36/DMAP1/MEAF6/HSP90AA1/UCHL5/FUS/PTGES3/HNRNPD/SSBP1/TRIM28/PTPRC/SPIDR/ATRX/ATM/PRKDC/SMARCD2/RPS3/CCT3/TNKS2/HNRNPA1/SMARCC2/HSP90AB1/FAF1/CCT6A/PPP1R10/PRKD2/SMCHD1/NBN/MORF4L1/USP1/CCT8/MLH1/CCT7/DHX9/GNL3/USP7/PARP1/CCT4/BAX/KAT7/CCT5/PRKCD/RUVBL1/RGCC	45
GO:0022900	electron transport chain	32/1137	177/18614	2.83538e-08	2.03978e-06	1.78631e-06	UQCRB/CYBA/COX7C/NDUFAB1/NDUFV1/COX6C/COX5B/NDUFB10/NDUFB2/SDHC/NDUFA12/SURF1/COX5A/IDH3B/COX7B/CYC1/UQCRQ/QDPR/ME2/COX4I1/CIAPIN1/NDUFS2/NDUFB4/NDUFC1/ETFRF1/NDUFS6/PUM2/NDUFB6/UQCRC2/CHCHD2/NDUFA3/UQCRC1	32
GO:0009142	nucleoside triphosphate biosynthetic process	27/1137	134/18614	3.28521e-08	2.32581e-06	2.0368e-06	ATP5PO/NDUFAB1/NDUFV1/ATP5MC2/ATP5PB/ATP5MF/NDUFB10/NDUFB2/SDHC/NDUFA12/ATP5PD/IMPDH2/ATP5MC1/UCKL1/NDUFB11/NME7/NDUFS2/NDUFB4/NDUFC1/NDUFS6/PARP1/NDUFB6/ATP5F1A/ATP5MC3/ATP5F1C/NDUFA3/ATP5F1D	27
GO:0046700	heterocycle catabolic process	62/1137	488/18614	3.32948e-08	2.32581e-06	2.0368e-06	DHX36/SUCLG2/VIM/RNASEH2B/DUT/HNRNPU/CNOT2/HINT1/DNPH1/SUCLG1/EIF3E/TARDBP/GAS5/RBM10/RBM8A/EXOSC1/EXOSC5/FUS/SKIC3/HNRNPD/ADA/EIF4A3/SSB/ATM/LSM6/SLIRP/TUT4/EXOSC10/LSM5/PABPC4/SKIC2/EXOSC9/FHIT/NPM1/HMOX2/FASTK/GOT2/KYNU/CNOT7/RNASET2/BLVRA/CIRBP/EXOSC8/DDX49/PUM2/ISG20/MLH1/DHX9/UPF1/APEX1/NUDT5/DICER1/APOBEC3G/BAX/CNOT1/CELF1/PRKCD/DDX5/ZCCHC7/TENT2/XRN2/FXR1	62
GO:0019646	aerobic electron transport chain	22/1137	94/18614	3.66043e-08	2.52047e-06	2.20727e-06	UQCRB/COX7C/NDUFAB1/NDUFV1/COX6C/COX5B/NDUFB10/NDUFB2/SDHC/COX5A/COX7B/CYC1/UQCRQ/COX4I1/NDUFS2/NDUFB4/NDUFC1/NDUFS6/NDUFB6/UQCRC2/NDUFA3/UQCRC1	22
GO:0000380	alternative mRNA splicing, via spliceosome	19/1137	72/18614	3.9107e-08	2.65487e-06	2.32497e-06	SFPQ/YTHDC1/PQBP1/HNRNPU/RBM8A/KHDRBS1/SLU7/HNRNPM/HNRNPA1/PUF60/TRA2B/RBM17/RBM25/RBM5/DHX9/RBMX/CELF1/DDX5/FXR1	19
GO:0034655	nucleobase-containing compound catabolic process	58/1137	447/18614	4.41472e-08	2.95541e-06	2.58816e-06	DHX36/SUCLG2/VIM/RNASEH2B/DUT/HNRNPU/CNOT2/HINT1/DNPH1/SUCLG1/EIF3E/TARDBP/GAS5/RBM10/RBM8A/EXOSC1/EXOSC5/FUS/SKIC3/HNRNPD/ADA/EIF4A3/SSB/ATM/LSM6/SLIRP/TUT4/EXOSC10/LSM5/PABPC4/SKIC2/EXOSC9/FHIT/NPM1/FASTK/CNOT7/RNASET2/CIRBP/EXOSC8/DDX49/PUM2/ISG20/MLH1/DHX9/UPF1/APEX1/NUDT5/DICER1/APOBEC3G/BAX/CNOT1/CELF1/PRKCD/DDX5/ZCCHC7/TENT2/XRN2/FXR1	58
GO:2001252	positive regulation of chromosome organization	24/1137	111/18614	4.58718e-08	3.0288e-06	2.65243e-06	DHX36/MPHOSPH8/SMC2/UCHL5/HNRNPD/TPR/SSBP1/TRIM28/ATRX/ATM/CCT3/TNKS2/HNRNPA1/CCT6A/PPP1R10/NBN/SMC4/CCT8/CCT7/GNL3/PPHLN1/CCT4/CCT5/RUVBL1	24
GO:0016032	viral process	56/1137	426/18614	4.81711e-08	3.13763e-06	2.74774e-06	CHMP2B/LARP7/ZNFX1/PPID/MPHOSPH8/CALCOCO2/CHD1/TARDBP/EIF3A/TRIM28/EIF2D/CSNK1A1/SSB/CHMP7/LEF1/EIF3F/HLA-DRB1/HDAC1/UBP1/DEK/HSPA8/CCL4/DDX56/OAS1/TOP2B/EIF3L/BST2/HSP90AB1/PSMC3/SLC3A2/IFI16/SIVA1/PKN2/RPSA/CNOT7/TNFRSF14/LY6E/LGALS1/SPCS3/EEF1A1/EIF2AK2/LGALS9/ISG20/DHX9/EIF3G/PHB1/ATG5/ATG16L2/RAN/APOBEC3G/CD74/EIF3D/PLSCR1/SRPK2/TRIM8/ILF3	56
GO:1903241	U2-type prespliceosome assembly	11/1137	24/18614	5.02428e-08	3.22893e-06	2.8277e-06	SNRPF/SNRPE/SNRPG/SNRPD1/SNRPD2/SNRPA1/SF3B2/SF3B4/SNRPB2/SF3B1/DDX46	11
GO:0044270	cellular nitrogen compound catabolic process	61/1137	486/18614	6.69572e-08	4.24649e-06	3.71881e-06	DHX36/SUCLG2/VIM/RNASEH2B/DUT/HNRNPU/CNOT2/HINT1/DNPH1/SUCLG1/EIF3E/TARDBP/GAS5/RBM10/RBM8A/EXOSC1/EXOSC5/FUS/SKIC3/HNRNPD/ADA/EIF4A3/SSB/ATM/LSM6/SLIRP/TUT4/EXOSC10/LSM5/PABPC4/SKIC2/EXOSC9/FHIT/NPM1/HMOX2/FASTK/KYNU/CNOT7/RNASET2/BLVRA/CIRBP/EXOSC8/DDX49/PUM2/ISG20/MLH1/DHX9/UPF1/APEX1/NUDT5/DICER1/APOBEC3G/BAX/CNOT1/CELF1/PRKCD/DDX5/ZCCHC7/TENT2/XRN2/FXR1	61
GO:0072522	purine-containing compound biosynthetic process	41/1137	271/18614	6.84353e-08	4.25455e-06	3.72587e-06	ATP5PO/GMPS/NADK2/NDUFAB1/NDUFV1/ATP5MC2/ATP5PB/ATP5MF/NDUFB10/NDUFB2/ADA/PRPSAP2/SDHC/NDUFA12/ATP5PD/IMPDH2/ATP5MC1/NDUFB11/APRT/PDHA1/NME7/KYNU/NDUFS2/NDUFB4/NDUFC1/GART/COASY/NDUFS6/ACSL5/ATIC/PARP1/NDUFB6/ATP5F1A/ATP5MC3/ACSS1/PDHB/ATP5F1C/NDUFA3/ATP5F1D/PANK4/NADSYN1	41
GO:0051028	mRNA transport	26/1137	130/18614	6.88496e-08	4.25455e-06	3.72587e-06	NUP205/CHTOP/NUP88/YTHDC1/RBM8A/DDX39A/TPR/NUP210/EIF4A3/THOC6/NUP133/NUP85/HNRNPA1/NUP107/NXF1/SEC13/SRSF7/NUP54/HNRNPA3/RAE1/DHX9/UPF1/MVP/NUTF2/ENY2/GLE1	26
GO:0030490	maturation of SSU-rRNA	16/1137	54/18614	7.85326e-08	4.79148e-06	4.19608e-06	RPS8/RPS28/RPS16/RPS21/LSM6/IMP4/GTF2H5/RPS19/RPS14/RIOK1/TBL3/BMS1/UTP4/NGDN/DCAF13/KRI1	16
GO:0009165	nucleotide biosynthetic process	43/1137	295/18614	9.7844e-08	5.8951e-06	5.16256e-06	ATP5PO/GMPS/NADK2/DUT/NDUFAB1/NDUFV1/ATP5MC2/ATP5PB/ATP5MF/NDUFB10/NDUFB2/ADA/PRPSAP2/SDHC/NDUFA12/ATP5PD/IMPDH2/ATP5MC1/UCKL1/NDUFB11/APRT/PDHA1/NME7/KYNU/NDUFS2/NDUFB4/NDUFC1/GART/COASY/NDUFS6/ACSL5/ATIC/PARP1/NDUFB6/ATP5F1A/ATP5MC3/ACSS1/PDHB/ATP5F1C/NDUFA3/ATP5F1D/PANK4/NADSYN1	43
GO:0032200	telomere organization	32/1137	187/18614	1.07929e-07	6.42243e-06	5.62436e-06	DHX36/HNRNPU/H3-3B/NSMCE1/HSP90AA1/UCHL5/PTGES3/HNRNPD/NHP2/ATRX/ATM/PRKDC/EXOSC10/NSMCE4A/CCT3/TNKS2/HNRNPA1/HSP90AB1/CCT6A/PPP1R10/NBN/H3C2/CCT8/CCT7/GNL3/USP7/UPF1/APEX1/PARP1/CCT4/CCT5/RUVBL1	32
GO:0034250	positive regulation of amide metabolic process	30/1137	169/18614	1.16423e-07	6.84342e-06	5.99304e-06	DHX36/VIM/HNRNPU/C1QBP/EIF3E/KHDRBS1/HNRNPD/RPL5/EIF4A3/SSB/PRKDC/RPS27L/SERP1/RPS4X/EIF5A/DHX29/NPM1/NSUN5/MIF4GD/CIRBP/USP16/METTL5/EIF6/DHX9/SIRT3/EIF3D/PRKCD/RPUSD3/EEF2/FXR1	30
GO:1901293	nucleoside phosphate biosynthetic process	43/1137	297/18614	1.18867e-07	6.90289e-06	6.04512e-06	ATP5PO/GMPS/NADK2/DUT/NDUFAB1/NDUFV1/ATP5MC2/ATP5PB/ATP5MF/NDUFB10/NDUFB2/ADA/PRPSAP2/SDHC/NDUFA12/ATP5PD/IMPDH2/ATP5MC1/UCKL1/NDUFB11/APRT/PDHA1/NME7/KYNU/NDUFS2/NDUFB4/NDUFC1/GART/COASY/NDUFS6/ACSL5/ATIC/PARP1/NDUFB6/ATP5F1A/ATP5MC3/ACSS1/PDHB/ATP5F1C/NDUFA3/ATP5F1D/PANK4/NADSYN1	43
GO:0006402	mRNA catabolic process	40/1137	268/18614	1.43203e-07	8.16893e-06	7.15384e-06	DHX36/VIM/HNRNPU/CNOT2/EIF3E/TARDBP/RBM10/RBM8A/EXOSC5/FUS/SKIC3/HNRNPD/EIF4A3/SSB/ATM/LSM6/TUT4/EXOSC10/LSM5/PABPC4/SKIC2/EXOSC9/NPM1/FASTK/CNOT7/CIRBP/EXOSC8/PUM2/MLH1/DHX9/UPF1/APEX1/CNOT1/CELF1/PRKCD/DDX5/ZCCHC7/TENT2/XRN2/FXR1	40
GO:0000956	nuclear-transcribed mRNA catabolic process	25/1137	126/18614	1.44058e-07	8.16893e-06	7.15384e-06	DHX36/HNRNPU/CNOT2/EIF3E/RBM8A/EXOSC5/SKIC3/HNRNPD/EIF4A3/SSB/ATM/TUT4/EXOSC10/SKIC2/EXOSC9/CNOT7/EXOSC8/MLH1/DHX9/UPF1/CNOT1/DDX5/ZCCHC7/TENT2/XRN2	25
GO:1900182	positive regulation of protein localization to nucleus	20/1137	86/18614	1.69573e-07	9.50397e-06	8.32298e-06	DMAP1/LARP7/TARDBP/HSP90AA1/TPR/TRIM28/RBM22/UBR5/CCT3/CCT6A/PYHIN1/CCT8/CCT7/PARP1/RAN/CCT4/KAT7/CCT5/PRKCD/TRIM8	20
GO:1903050	regulation of proteolysis involved in protein catabolic process	36/1137	230/18614	1.81379e-07	1.00488e-05	8.80011e-06	NOP53/PSMC2/OPHN1/EIF3H/PDCL3/RPL23/RPS7/UCHL5/RPL11/PSMD10/CSNK1A1/RPL5/SDCBP/PSME2/UFL1/PSMC4/RACK1/HSP90AB1/PSMC3/NUB1/CCDC22/FHIT/UBE3A/USP25/PSME1/UBXN1/PYHIN1/ATP5IF1/PRKACA/PSMD14/WAC/USP7/TMEM259/ATXN3/HECTD1/BTRC	36
GO:0015931	nucleobase-containing compound transport	35/1137	221/18614	2.00002e-07	1.09546e-05	9.59339e-06	NUP205/CHTOP/NUP88/YTHDC1/RBM8A/KHDRBS1/DDX39A/TPR/NUP210/EIF4A3/SSB/KPNB1/THOC6/NUP133/TOMM20/NUP85/HNRNPA1/NUP107/CPSF6/NXF1/NPM1/SEC13/SRSF7/NUP54/HNRNPA3/RAE1/DHX9/SLC25A6/UPF1/MVP/NUTF2/ENY2/SLC35B1/RAN/GLE1	35
GO:0019081	viral translation	9/1137	18/18614	3.37544e-07	1.80774e-05	1.5831e-05	EIF3A/EIF2D/SSB/EIF3F/EIF3L/DHX9/EIF3G/ATG5/EIF3D	9
GO:1904872	regulation of telomerase RNA localization to Cajal body	9/1137	18/18614	3.37544e-07	1.80774e-05	1.5831e-05	NHP2/EXOSC10/CCT3/CCT6A/CCT8/CCT7/CCT4/CCT5/RUVBL1	9
GO:1990173	protein localization to nucleoplasm	8/1137	14/18614	4.07968e-07	2.16089e-05	1.89237e-05	NOP53/LARP7/CCT3/CCT6A/CCT8/CCT7/CCT4/CCT5	8
GO:0090670	RNA localization to Cajal body	9/1137	19/18614	6.06514e-07	3.07726e-05	2.69487e-05	NHP2/EXOSC10/CCT3/CCT6A/CCT8/CCT7/CCT4/CCT5/RUVBL1	9
GO:0090671	telomerase RNA localization to Cajal body	9/1137	19/18614	6.06514e-07	3.07726e-05	2.69487e-05	NHP2/EXOSC10/CCT3/CCT6A/CCT8/CCT7/CCT4/CCT5/RUVBL1	9
GO:0090672	telomerase RNA localization	9/1137	19/18614	6.06514e-07	3.07726e-05	2.69487e-05	NHP2/EXOSC10/CCT3/CCT6A/CCT8/CCT7/CCT4/CCT5/RUVBL1	9
GO:0090685	RNA localization to nucleus	9/1137	19/18614	6.06514e-07	3.07726e-05	2.69487e-05	NHP2/EXOSC10/CCT3/CCT6A/CCT8/CCT7/CCT4/CCT5/RUVBL1	9
GO:0032206	positive regulation of telomere maintenance	17/1137	70/18614	7.34124e-07	3.68591e-05	3.22789e-05	DHX36/UCHL5/HNRNPD/ATRX/ATM/CCT3/TNKS2/HNRNPA1/CCT6A/PPP1R10/NBN/CCT8/CCT7/GNL3/CCT4/CCT5/RUVBL1	17
GO:1901798	positive regulation of signal transduction by p53 class mediator	11/1137	30/18614	7.82323e-07	3.88742e-05	3.40436e-05	RPS15/RPL23/RPS20/RPS7/RPL37/RPL11/ATM/ING4/EIF5A/PYHIN1/DDX5	11
GO:0016570	histone modification	57/1137	475/18614	8.00905e-07	3.93915e-05	3.44966e-05	DMAP1/CHTOP/SFPQ/FBL/TAF2/BOD1L1/MBD2/ASH2L/MEAF6/TRMT112/NFYC/SUZ12/SAP30BP/DDB2/LEF1/HDAC1/UBR5/SART3/DEK/VRK1/SGF29/UFL1/ING4/ARID4A/RNF20/SUPT20H/ARID4B/NSD1/SUDS3/SMYD3/DPY30/HDAC2/PRKD2/SF3B1/MORF4L1/USP16/CLNS1A/CTR9/PHF1/BRMS1/TAF12/MAP3K7/WAC/CAMK2D/JMJD1C/USP7/PHB1/ATG5/CXXC1/ENY2/KMT2C/SIRT3/KAT7/BARD1/HDAC9/PIH1D1/RUVBL1	57
GO:1904874	positive regulation of telomerase RNA localization to Cajal body	8/1137	15/18614	8.27257e-07	3.94828e-05	3.45766e-05	NHP2/CCT3/CCT6A/CCT8/CCT7/CCT4/CCT5/RUVBL1	8
GO:1904869	regulation of protein localization to Cajal body	7/1137	11/18614	8.27337e-07	3.94828e-05	3.45766e-05	LARP7/CCT3/CCT6A/CCT8/CCT7/CCT4/CCT5	7
GO:1904871	positive regulation of protein localization to Cajal body	7/1137	11/18614	8.27337e-07	3.94828e-05	3.45766e-05	LARP7/CCT3/CCT6A/CCT8/CCT7/CCT4/CCT5	7
GO:0009615	response to virus	51/1137	408/18614	9.03851e-07	4.27114e-05	3.7404e-05	RPS15A/DHX36/ZNFX1/PQBP1/C1QBP/CARD8/TPT1/G3BP1/HSP90AA1/EXOSC5/POU2F2/TRIM28/PTPRC/SAP30BP/IFNAR1/NLRP1/CCL4/DDX56/OAS1/PHB2/ABCF3/BST2/IFI16/EIF5A/IRF2/NFKB1/AUP1/CNOT7/IFI44/IFI6/EIF2AK2/LGALS9/GBP1/ISG20/DDX1/DHX9/STAT2/IFI44L/CASP1/PHB1/ATG5/NPC2/APOBEC3G/SELENOK/BAX/PLSCR1/CCT5/TRIM8/POLR3C/ILF3/DHX15	51
GO:0000027	ribosomal large subunit assembly	10/1137	25/18614	9.76334e-07	4.56886e-05	4.00112e-05	NOP53/RPL23A/RPL10/RPL11/RPL38/RPL6/RPL5/RPLP0/BRIX1/DHX30	10
GO:2001020	regulation of response to DNA damage stimulus	42/1137	311/18614	1.11514e-06	5.16825e-05	4.52603e-05	PHF10/DMAP1/RNASEH2B/TAF2/TPT1/MEAF6/NSMCE1/UCHL5/PSMD10/FUS/TRIM28/BCLAF1/SPIDR/ATM/PRKDC/SMARCD2/UBR5/DEK/SGF29/NSMCE4A/RPS3/ING4/SMARCC2/SUPT20H/PPP1R10/SMCHD1/PYHIN1/MORF4L1/USP1/CD44/TAF12/DHX9/PARP1/ENY2/CD74/KAT7/BARD1/PRKCD/DDX5/RUVBL1/CUL4A/FXR1	42
GO:2000059	negative regulation of ubiquitin-dependent protein catabolic process	14/1137	51/18614	1.42472e-06	6.54014e-05	5.72744e-05	NOP53/EIF3H/PDCL3/RPL23/RPS7/UCHL5/RPL11/RPL5/SDCBP/HSP90AB1/FHIT/UBXN1/WAC/USP7	14
GO:0000462	maturation of SSU-rRNA from tricistronic rRNA transcript (SSU-rRNA, 5.8S rRNA, LSU-rRNA)	12/1137	38/18614	1.56289e-06	6.98767e-05	6.11936e-05	RPS8/RPS16/RPS21/GTF2H5/RPS19/RPS14/TBL3/BMS1/UTP4/NGDN/DCAF13/KRI1	12
GO:0002399	MHC class II protein complex assembly	8/1137	16/18614	1.5657e-06	6.98767e-05	6.11936e-05	HLA-DMA/HLA-DMB/HLA-DRB1/HLA-DPB1/HLA-DQA1/HLA-DPA1/HLA-DQB1/HLA-DRA	8
GO:0002503	peptide antigen assembly with MHC class II protein complex	8/1137	16/18614	1.5657e-06	6.98767e-05	6.11936e-05	HLA-DMA/HLA-DMB/HLA-DRB1/HLA-DPB1/HLA-DQA1/HLA-DPA1/HLA-DQB1/HLA-DRA	8
GO:1903051	negative regulation of proteolysis involved in protein catabolic process	16/1137	66/18614	1.58952e-06	7.02887e-05	6.15544e-05	NOP53/OPHN1/EIF3H/PDCL3/RPL23/RPS7/UCHL5/RPL11/RPL5/SDCBP/HSP90AB1/FHIT/USP25/UBXN1/WAC/USP7	16
GO:1903039	positive regulation of leukocyte cell-cell adhesion	38/1137	273/18614	1.71048e-06	7.49501e-05	6.56366e-05	PHF10/RASAL3/SART1/CD3E/ADA/PTPRC/SKAP1/HLA-DMA/HLA-DMB/LEF1/HLA-DRB1/SMARCD2/RPS3/HLA-DPB1/VAV1/TNFSF13B/AIF1/SMARCC2/IL7R/CORO1A/CYRIB/HSPD1/LYN/ITGA4/TNFRSF14/HLA-DQA1/LGALS1/CD44/LGALS9/HLA-DPA1/HSPH1/CCDC88B/RIPK2/HLA-DQB1/LCK/CD74/SELENOK/HLA-DRA	38
GO:0070202	regulation of establishment of protein localization to chromosome	7/1137	12/18614	1.88046e-06	7.88157e-05	6.90218e-05	SPIDR/CCT3/CCT6A/CCT8/CCT7/CCT4/CCT5	7
GO:1903405	protein localization to nuclear body	7/1137	12/18614	1.88046e-06	7.88157e-05	6.90218e-05	LARP7/CCT3/CCT6A/CCT8/CCT7/CCT4/CCT5	7
GO:1904667	negative regulation of ubiquitin protein ligase activity	7/1137	12/18614	1.88046e-06	7.88157e-05	6.90218e-05	RPS15/RPL23/RPS20/RPS7/RPL37/RPL11/RPL5	7
GO:1904816	positive regulation of protein localization to chromosome, telomeric region	7/1137	12/18614	1.88046e-06	7.88157e-05	6.90218e-05	CCT3/CCT6A/CCT8/CCT7/GNL3/CCT4/CCT5	7
GO:1904867	protein localization to Cajal body	7/1137	12/18614	1.88046e-06	7.88157e-05	6.90218e-05	LARP7/CCT3/CCT6A/CCT8/CCT7/CCT4/CCT5	7
GO:0019080	viral gene expression	20/1137	100/18614	2.19355e-06	9.11459e-05	7.98198e-05	LARP7/CHD1/TARDBP/EIF3A/EIF2D/CSNK1A1/SSB/LEF1/EIF3F/HDAC1/UBP1/CCL4/EIF3L/PSMC3/SPCS3/DHX9/EIF3G/ATG5/EIF3D/TRIM8	20
GO:0006406	mRNA export from nucleus	16/1137	68/18614	2.43255e-06	0.000100213	8.77599e-05	CHTOP/NUP88/YTHDC1/RBM8A/DDX39A/TPR/EIF4A3/THOC6/NUP133/NUP85/NUP107/NXF1/RAE1/UPF1/ENY2/GLE1	16
GO:0061077	chaperone-mediated protein folding	16/1137	69/18614	2.98908e-06	0.000122096	0.000106924	PDCD5/PPID/PDCL3/DNAJB1/PTGES3/HSPA8/CCT3/HSPA9/CCT6A/PDIA4/CCT8/CCT7/HSPH1/CCT4/CD74/CCT5	16
GO:0019079	viral genome replication	23/1137	129/18614	3.15016e-06	0.000127595	0.00011174	ZNFX1/PPID/MPHOSPH8/TRIM28/DEK/HSPA8/DDX56/OAS1/TOP2B/BST2/IFI16/PKN2/CNOT7/EEF1A1/EIF2AK2/ISG20/PHB1/ATG5/ATG16L2/APOBEC3G/PLSCR1/SRPK2/ILF3	23
GO:0050870	positive regulation of T cell activation	35/1137	249/18614	3.47221e-06	0.000139467	0.000122136	PHF10/RASAL3/SART1/CD3E/ADA/PTPRC/HLA-DMA/HLA-DMB/LEF1/HLA-DRB1/SMARCD2/RPS3/HLA-DPB1/VAV1/TNFSF13B/AIF1/SMARCC2/IL7R/CORO1A/CYRIB/HSPD1/LYN/TNFRSF14/HLA-DQA1/LGALS1/LGALS9/HLA-DPA1/HSPH1/CCDC88B/RIPK2/HLA-DQB1/LCK/CD74/SELENOK/HLA-DRA	35
GO:0031123	RNA 3'-end processing	20/1137	103/18614	3.54448e-06	0.000141193	0.000123648	DHX36/SSU72/LARP7/YTHDC1/FBL/HSD17B10/EXOSC5/SSB/RPS21/INTS8/TUT4/EXOSC10/CPSF6/WDR33/EXOSC9/CPSF1/EXOSC8/CPSF3/BARD1/TENT2	20
GO:0051170	import into nucleus	27/1137	168/18614	3.62976e-06	0.000143405	0.000125585	DMAP1/APPL1/NUP88/KPNA1/TARDBP/RPL23/HSP90AA1/TPR/TRIM28/RBM22/KPNB1/UBR5/PHB2/NUP133/NUP85/HNRNPA1/NUP107/SEC13/PPP1R10/HIKESHI/NUP54/CHP1/NUTF2/RAN/SPG11/PRKCD/NOLC1	27
GO:0045088	regulation of innate immune response	46/1137	373/18614	4.42478e-06	0.000173394	0.000151847	NOP53/APPL1/CYBA/SFPQ/ZNFX1/PQBP1/C1QBP/LYAR/GBP5/RPS6KA3/HSP90AA1/TXK/PRKDC/PARP14/NLRP1/OAS1/PHB2/VAV1/PAK2/RPS19/IFI16/IFI35/KLRB1/HSPD1/LYN/CNOT7/HLA-F/PYHIN1/TYROBP/LGALS9/PUM2/MAP3K7/DHX9/STAT2/CD300A/PARP1/CASP1/PHB1/PAK1/ATG5/RIPK2/CYLD/PLSCR1/ANKRD17/PTPN2/POLR3C	46
GO:0050821	protein stabilization	31/1137	213/18614	6.02536e-06	0.000234212	0.000205108	NOP53/NAA16/CCNH/PDCL3/RPL23/HSP90AA1/RPS7/RPAP3/RPL11/PTGES3/PFDN2/RPL5/PHB2/CCT3/HSP90AB1/CREB1/CCT6A/HSPD1/PYHIN1/TYROBP/CHP1/CCT8/CCT7/USP7/PHB1/ATP1B3/CCT4/CCT5/PRKCD/PIH1D1/RUVBL1	31
GO:1900180	regulation of protein localization to nucleus	23/1137	134/18614	6.12316e-06	0.000234395	0.000205269	DMAP1/LARP7/TARDBP/HSP90AA1/TPR/TRIM28/RBM22/UBR5/CCT3/CCT6A/NUP54/PYHIN1/CHP1/CCT8/CCT7/PARP1/RAN/CCT4/KAT7/CCT5/PRKCD/TRIM8/NOLC1	23
GO:0000460	maturation of 5.8S rRNA	11/1137	36/18614	6.12734e-06	0.000234395	0.000205269	NSA2/RPS21/PRKDC/EXOSC10/C1D/EXOSC9/RPF1/EXOSC8/EIF6/WDR12/KRI1	11
GO:0006606	protein import into nucleus	26/1137	163/18614	6.28973e-06	0.000238259	0.000208652	DMAP1/APPL1/NUP88/KPNA1/TARDBP/RPL23/HSP90AA1/TPR/TRIM28/RBM22/KPNB1/UBR5/PHB2/NUP133/NUP85/NUP107/SEC13/PPP1R10/HIKESHI/NUP54/CHP1/NUTF2/RAN/SPG11/PRKCD/NOLC1	26
GO:0010833	telomere maintenance via telomere lengthening	17/1137	81/18614	6.32721e-06	0.000238259	0.000208652	DHX36/HNRNPU/HSP90AA1/PTGES3/NHP2/ATM/EXOSC10/CCT3/TNKS2/HNRNPA1/HSP90AB1/CCT6A/CCT8/CCT7/PARP1/CCT4/CCT5	17
GO:0031647	regulation of protein stability	41/1137	322/18614	6.62957e-06	0.00024771	0.000216929	NOP53/NAA16/CCNH/TARDBP/TOMM7/PDCL3/RPL23/HSP90AA1/RPS7/RPAP3/RPL11/PTGES3/PFDN2/RPL5/PRKDC/CDKN2AIP/HSPA8/PHB2/CCT3/HSP90AB1/CREB1/CCT6A/USP25/QRSL1/HSPD1/PYHIN1/RNF149/TYROBP/CHP1/CCT8/CCT7/USP7/PHB1/ATP1B3/DERL1/CCT4/CCT5/PRKCD/PIH1D1/BTRC/RUVBL1	41
GO:1904814	regulation of protein localization to chromosome, telomeric region	7/1137	14/18614	7.30954e-06	0.000271015	0.000237338	CCT3/CCT6A/CCT8/CCT7/GNL3/CCT4/CCT5	7
GO:0043161	proteasome-mediated ubiquitin-dependent protein catabolic process	51/1137	439/18614	7.63235e-06	0.000280824	0.000245928	NOP53/TRIP4/PSMC2/PSMD7/PSMB1/EIF3H/PSMB6/UBE2D3/HSP90B1/UCHL5/RPL11/PSMD10/PSMB3/CUL1/CSNK1A1/PSMA4/SDCBP/PSMD8/UFL1/PSMC4/ANAPC11/SPOP/NSFL1C/ERLEC1/PPP2R5C/RACK1/UBE2G1/HSP90AB1/FAF1/PSMC3/NUB1/FHIT/PSMD12/UBXN1/AUP1/RMND5B/CUL5/PSMB2/ANAPC4/PSMD14/MAEA/PSMA7/WAC/USP7/MARCHF6/DERL1/ATXN3/HECTD1/SEC61B/BTRC/CUL4A	51
GO:0050792	regulation of viral process	26/1137	165/18614	7.88954e-06	0.000288088	0.000252289	LARP7/ZNFX1/PPID/MPHOSPH8/TRIM28/HLA-DRB1/UBP1/OAS1/TOP2B/BST2/IFI16/PKN2/CNOT7/LY6E/LGALS1/EIF2AK2/LGALS9/ISG20/DHX9/ATG5/APOBEC3G/CD74/PLSCR1/SRPK2/TRIM8/ILF3	26
GO:1904851	positive regulation of establishment of protein localization to telomere	6/1137	10/18614	8.70098e-06	0.000315329	0.000276145	CCT3/CCT6A/CCT8/CCT7/CCT4/CCT5	6
GO:2001022	positive regulation of response to DNA damage stimulus	26/1137	167/18614	9.85205e-06	0.00035438	0.000310343	PHF10/DMAP1/MEAF6/NSMCE1/UCHL5/FUS/TRIM28/BCLAF1/SPIDR/ATM/PRKDC/SMARCD2/NSMCE4A/RPS3/ING4/SMARCC2/SMCHD1/PYHIN1/MORF4L1/USP1/DHX9/PARP1/PRKCD/DDX5/RUVBL1/FXR1	26
GO:0007006	mitochondrial membrane organization	21/1137	120/18614	1.12592e-05	0.000401996	0.000352043	PDCD5/TOMM7/HSP90AA1/MICOS13/TOMM20/CHCHD3/HEBP2/HSPA9/IMMT/ALKBH7/SAMM50/TIMM22/ACAA2/TOMM22/ATP5IF1/RHOT1/BLOC1S2/SLC25A6/BAX/TIMM50/GZMB	21
GO:0006457	protein folding	31/1137	220/18614	1.17326e-05	0.000415816	0.000364145	PDCD5/PPID/DNAJC21/PDCL3/HSP90B1/HSP90AA1/NUDC/DNAJB1/PTGES3/NFYC/PFDN2/HSPA8/CCT3/HSP90AB1/HSPA9/CCT6A/PPIG/DNAJC19/HSPD1/TBCA/AIP/PDIA4/CCT8/CCT7/HSPH1/SNRNP70/TTC1/CCT4/CD74/CCT5/DNAJA1	31
GO:0070585	protein localization to mitochondrion	22/1137	130/18614	1.22243e-05	0.000426346	0.000373367	PDCD5/UBE2D3/MTERF4/TOMM7/HSP90AA1/HAX1/MTCH2/TOMM20/TIMM17A/DNAJC19/HSPD1/AIP/SAMM50/TIMM22/TOMM22/PMPCB/ATP5IF1/TIMM23/BAX/TIMM50/GZMB/DNAJA1	22
GO:0002396	MHC protein complex assembly	8/1137	20/18614	1.2295e-05	0.000426346	0.000373367	HLA-DMA/HLA-DMB/HLA-DRB1/HLA-DPB1/HLA-DQA1/HLA-DPA1/HLA-DQB1/HLA-DRA	8
GO:0002501	peptide antigen assembly with MHC protein complex	8/1137	20/18614	1.2295e-05	0.000426346	0.000373367	HLA-DMA/HLA-DMB/HLA-DRB1/HLA-DPB1/HLA-DQA1/HLA-DPA1/HLA-DQB1/HLA-DRA	8
GO:2000278	regulation of DNA biosynthetic process	21/1137	121/18614	1.28519e-05	0.0004384	0.000383923	HNRNPU/MEAF6/HSP90AA1/PTGES3/HNRNPD/ATM/EXOSC10/ING4/CCT3/TNKS2/HNRNPA1/HSP90AB1/CCT6A/PRKD2/USP1/CCT8/CCT7/CCT4/KAT7/CCT5/RGCC	21
GO:0000054	ribosomal subunit export from nucleus	7/1137	15/18614	1.29815e-05	0.0004384	0.000383923	NUP88/RPS15/SDAD1/NPM1/ABCE1/EIF6/RAN	7
GO:0033750	ribosome localization	7/1137	15/18614	1.29815e-05	0.0004384	0.000383923	NUP88/RPS15/SDAD1/NPM1/ABCE1/EIF6/RAN	7
GO:0006099	tricarboxylic acid cycle	10/1137	32/18614	1.30065e-05	0.0004384	0.000383923	SUCLG2/MRPS36/SUCLG1/SDHC/IDH3B/PDHA1/MDH1/MDH2/FH/PDHB	10
GO:0007004	telomere maintenance via telomerase	15/1137	69/18614	1.40323e-05	0.000469694	0.000411328	HNRNPU/HSP90AA1/PTGES3/NHP2/ATM/EXOSC10/CCT3/TNKS2/HNRNPA1/HSP90AB1/CCT6A/CCT8/CCT7/CCT4/CCT5	15
GO:0002831	regulation of response to biotic stimulus	52/1137	463/18614	1.61151e-05	0.000535688	0.000469122	NOP53/APPL1/CYBA/SFPQ/ZNFX1/PQBP1/C1QBP/LYAR/GBP5/CARD8/RPS6KA3/HSP90AA1/TXK/PRKDC/PARP14/HLA-DRB1/NLRP1/OAS1/PHB2/VAV1/PAK2/RPS19/SIGIRR/IFI16/IFI35/KLRB1/HSPD1/LYN/CNOT7/HLA-F/PYHIN1/TYROBP/LGALS9/PUM2/MAP3K7/DHX9/STAT2/CD300A/PARP1/CASP1/PHB1/PAK1/ATG5/RIPK2/CYLD/APOBEC3G/SELENOK/PLSCR1/ANKRD17/PTPN2/LY86/POLR3C	52
GO:0072655	establishment of protein localization to mitochondrion	21/1137	123/18614	1.666e-05	0.000550007	0.000481661	PDCD5/UBE2D3/MTERF4/TOMM7/HSP90AA1/HAX1/TOMM20/TIMM17A/DNAJC19/HSPD1/AIP/SAMM50/TIMM22/TOMM22/PMPCB/ATP5IF1/TIMM23/BAX/TIMM50/GZMB/DNAJA1	21
GO:0070203	regulation of establishment of protein localization to telomere	6/1137	11/18614	1.81494e-05	0.000595101	0.000521152	CCT3/CCT6A/CCT8/CCT7/CCT4/CCT5	6
GO:0009141	nucleoside triphosphate metabolic process	35/1137	269/18614	1.93363e-05	0.000629738	0.000551485	ATP5PO/DUT/NDUFAB1/NDUFV1/ATP5MC2/ATP5PB/ATP5MF/NDUFB10/NDUFB2/ADA/SDHC/NDUFA12/ATP5PD/HSPA8/IMPDH2/ATP5MC1/UCKL1/NDUFB11/NME7/NDUFS2/NDUFB4/NDUFC1/ATP5IF1/EIF6/NDUFS6/PARP1/NDUFB6/NUDT5/ATP5F1A/RAN/GIMAP7/ATP5MC3/ATP5F1C/NDUFA3/ATP5F1D	35
GO:0061136	regulation of proteasomal protein catabolic process	28/1137	194/18614	1.95607e-05	0.000632768	0.000554139	NOP53/PSMC2/OPHN1/EIF3H/UCHL5/RPL11/PSMD10/CSNK1A1/SDCBP/PSME2/UFL1/PSMC4/RACK1/HSP90AB1/PSMC3/NUB1/FHIT/USP25/PSME1/UBXN1/PRKACA/PSMD14/WAC/USP7/TMEM259/ATXN3/HECTD1/BTRC	28
GO:0051251	positive regulation of lymphocyte activation	40/1137	327/18614	2.21134e-05	0.000710576	0.000622278	PHF10/RASAL3/SART1/CD3E/ADA/PTPRC/HLA-DMA/HLA-DMB/LEF1/PRKDC/HLA-DRB1/SMARCD2/RPS3/HLA-DPB1/VAV1/TNFSF13B/AIF1/SMARCC2/IL7R/CORO1A/CYRIB/HSPD1/LYN/TNFRSF14/HLA-DQA1/HLA-F/LGALS1/TYROBP/LGALS9/MLH1/HLA-DPA1/HSPH1/CCDC88B/RIPK2/HLA-DQB1/LCK/CD74/SELENOK/HLA-DRA/BLOC1S6	40
GO:0009144	purine nucleoside triphosphate metabolic process	33/1137	249/18614	2.26856e-05	0.000724137	0.000634153	ATP5PO/NDUFAB1/NDUFV1/ATP5MC2/ATP5PB/ATP5MF/NDUFB10/NDUFB2/ADA/SDHC/NDUFA12/ATP5PD/HSPA8/IMPDH2/ATP5MC1/NDUFB11/NME7/NDUFS2/NDUFB4/NDUFC1/ATP5IF1/EIF6/NDUFS6/PARP1/NDUFB6/NUDT5/ATP5F1A/RAN/GIMAP7/ATP5MC3/ATP5F1C/NDUFA3/ATP5F1D	33
GO:0000381	regulation of alternative mRNA splicing, via spliceosome	13/1137	56/18614	2.47532e-05	0.000784937	0.000687398	YTHDC1/HNRNPU/RBM8A/KHDRBS1/HNRNPA1/PUF60/TRA2B/RBM25/RBM5/RBMX/CELF1/DDX5/FXR1	13
GO:0009199	ribonucleoside triphosphate metabolic process	33/1137	251/18614	2.67432e-05	0.000842498	0.000737807	ATP5PO/NDUFAB1/NDUFV1/ATP5MC2/ATP5PB/ATP5MF/NDUFB10/NDUFB2/SDHC/NDUFA12/ATP5PD/HSPA8/IMPDH2/ATP5MC1/UCKL1/NDUFB11/NME7/NDUFS2/NDUFB4/NDUFC1/ATP5IF1/EIF6/NDUFS6/PARP1/NDUFB6/NUDT5/ATP5F1A/RAN/GIMAP7/ATP5MC3/ATP5F1C/NDUFA3/ATP5F1D	33
GO:0070199	establishment of protein localization to chromosome	9/1137	28/18614	2.74813e-05	0.000860129	0.000753247	SPIDR/SGF29/CCT3/CCT6A/CCT8/CCT7/CCT4/CCT5/PIH1D1	9
GO:0050854	regulation of antigen receptor-mediated signaling pathway	14/1137	65/18614	3.01273e-05	0.000936274	0.000819929	ADA/PTPRC/RPS3/PRKCH/LPXN/EZR/PRKD2/LYN/PHPT1/CD22/GBP1/CD300A/LCK/PTPN2	14
GO:0043414	macromolecule methylation	39/1137	320/18614	3.03026e-05	0.000936274	0.000819929	DMAP1/EMG1/CHTOP/SNRPF/LARP7/FBL/MPHOSPH8/BOD1L1/SNRPE/MBD2/ASH2L/HSD17B10/SNRPG/TRMT112/NFYC/SNRPD1/SUZ12/SNRPD2/TRIM28/ATRX/MTO1/ARID4A/RNF20/ARID4B/SMYD3/DPY30/NSUN5/METTL5/CLNS1A/CTR9/PHF1/MTRR/BTG1/PARP1/CXXC1/BUD23/KMT2C/SPOCD1/PIH1D1	39
GO:0006446	regulation of translational initiation	16/1137	82/18614	3.08056e-05	0.000945751	0.000828229	EIF3H/EIF3E/EIF3K/KHDRBS1/TPR/RPL13A/EIF2B2/DHX29/NPM1/EIF4A2/MIF4GD/EIF2AK2/DDX1/PPP1CA/EIF4EBP1/EIF2S1	16
GO:2000573	positive regulation of DNA biosynthetic process	15/1137	74/18614	3.38806e-05	0.00103357	0.000905139	HSP90AA1/PTGES3/ATM/CCT3/TNKS2/HNRNPA1/HSP90AB1/CCT6A/PRKD2/USP1/CCT8/CCT7/CCT4/CCT5/RGCC	15
GO:0009408	response to heat	19/1137	110/18614	3.50989e-05	0.001064	0.000931787	DHX36/SOD1/HSP90AA1/DNAJB1/EIF2B1/TPR/EIF2B4/SLU7/ATM/DAXX/EIF2B2/HSP90AB1/HDAC2/LYN/HIKESHI/PRKACA/ATXN3/EIF2S1/DNAJA1	19
GO:0034341	response to type II interferon	22/1137	139/18614	3.5868e-05	0.00108052	0.000946254	VIM/GBP5/CALCOCO2/STX8/TXK/PARP14/GBP4/CCL4/RPL13A/AIF1/BST2/NUB1/DAPK3/KYNU/LGALS9/GBP1/HLA-DPA1/CASP1/CD74/EPRS1/PTPN2/GBP2	22
GO:0006414	translational elongation	13/1137	58/18614	3.68808e-05	0.00109768	0.000961283	TRIP4/EEF1B2/EIF4A3/RPLP2/RPLP1/RACK1/EIF5A/EEF1D/SARS1/USP16/EEF1A1/TUFM/EEF2	13
GO:0009205	purine ribonucleoside triphosphate metabolic process	32/1137	244/18614	3.69906e-05	0.00109768	0.000961283	ATP5PO/NDUFAB1/NDUFV1/ATP5MC2/ATP5PB/ATP5MF/NDUFB10/NDUFB2/SDHC/NDUFA12/ATP5PD/HSPA8/IMPDH2/ATP5MC1/NDUFB11/NME7/NDUFS2/NDUFB4/NDUFC1/ATP5IF1/EIF6/NDUFS6/PARP1/NDUFB6/NUDT5/ATP5F1A/RAN/GIMAP7/ATP5MC3/ATP5F1C/NDUFA3/ATP5F1D	32
GO:0045089	positive regulation of innate immune response	37/1137	300/18614	3.71209e-05	0.00109768	0.000961283	NOP53/APPL1/CYBA/SFPQ/ZNFX1/PQBP1/C1QBP/GBP5/RPS6KA3/HSP90AA1/TXK/PRKDC/NLRP1/OAS1/PHB2/VAV1/PAK2/RPS19/IFI16/IFI35/HSPD1/LYN/HLA-F/PYHIN1/TYROBP/PUM2/MAP3K7/DHX9/CD300A/CASP1/PHB1/PAK1/RIPK2/CYLD/PLSCR1/ANKRD17/POLR3C	37
GO:2000113	negative regulation of cellular macromolecule biosynthetic process	37/1137	301/18614	3.9895e-05	0.00116817	0.00102301	DHX36/EIF4E2/HNRNPU/CNOT2/EIF3E/TARDBP/ABCA7/EXOSC5/HNRNPD/TPR/MRPL13/EIF4A3/TUT4/DBI/RPL13A/RPS3/RACK1/AATF/EXOSC9/DAPK3/CNOT7/NCL/CIRBP/EIF2AK2/EXOSC8/EIF6/MLH1/DHX9/UPF1/EIF4EBP1/CNOT1/CELF1/EIF2S1/EPRS1/GZMB/FXR1/ILF3	37
GO:0006278	RNA-templated DNA biosynthetic process	15/1137	75/18614	3.99891e-05	0.00116817	0.00102301	HNRNPU/HSP90AA1/PTGES3/NHP2/ATM/EXOSC10/CCT3/TNKS2/HNRNPA1/HSP90AB1/CCT6A/CCT8/CCT7/CCT4/CCT5	15
GO:0034605	cellular response to heat	14/1137	67/18614	4.3116e-05	0.00124443	0.00108979	DHX36/HSP90AA1/DNAJB1/TPR/SLU7/ATM/DAXX/HSP90AB1/HDAC2/LYN/HIKESHI/PRKACA/ATXN3/EIF2S1	14
GO:0071806	protein transmembrane transport	14/1137	67/18614	4.3116e-05	0.00124443	0.00108979	TOMM7/SEC63/SEC61G/TOMM20/PEX16/TIMM17A/DNAJC19/HSPD1/TIMM22/TOMM22/LONP2/TIMM23/TIMM50/SEC61B	14
GO:1901799	negative regulation of proteasomal protein catabolic process	12/1137	51/18614	4.38006e-05	0.00125666	0.0011005	NOP53/OPHN1/EIF3H/UCHL5/RPL11/SDCBP/HSP90AB1/FHIT/USP25/UBXN1/WAC/USP7	12
GO:0051607	defense response to virus	37/1137	303/18614	4.60173e-05	0.00131245	0.00114936	DHX36/ZNFX1/PQBP1/C1QBP/CARD8/G3BP1/HSP90AA1/EXOSC5/TRIM28/PTPRC/NLRP1/DDX56/OAS1/PHB2/ABCF3/BST2/IFI16/IRF2/CNOT7/IFI6/EIF2AK2/GBP1/ISG20/DDX1/DHX9/STAT2/IFI44L/CASP1/PHB1/ATG5/APOBEC3G/SELENOK/PLSCR1/TRIM8/POLR3C/ILF3/DHX15	37
GO:0002833	positive regulation of response to biotic stimulus	39/1137	327/18614	4.9159e-05	0.00137977	0.00120831	NOP53/APPL1/CYBA/SFPQ/ZNFX1/PQBP1/C1QBP/GBP5/RPS6KA3/HSP90AA1/TXK/PRKDC/HLA-DRB1/NLRP1/OAS1/PHB2/VAV1/PAK2/RPS19/IFI16/IFI35/HSPD1/LYN/HLA-F/PYHIN1/TYROBP/PUM2/MAP3K7/DHX9/CD300A/CASP1/PHB1/PAK1/RIPK2/CYLD/PLSCR1/ANKRD17/LY86/POLR3C	39
GO:0034249	negative regulation of amide metabolic process	37/1137	304/18614	4.93885e-05	0.00137977	0.00120831	DHX36/EIF4E2/HNRNPU/CNOT2/EIF3E/TARDBP/ABCA7/ORMDL1/EXOSC5/HNRNPD/TPR/MRPL13/EIF4A3/TUT4/RPL13A/RPS3/RACK1/EXOSC9/DAPK3/CNOT7/NCL/CIRBP/BIN1/EIF2AK2/EXOSC8/EIF6/MLH1/DHX9/UPF1/EIF4EBP1/CNOT1/CELF1/EIF2S1/EPRS1/GZMB/FXR1/ILF3	37
GO:0140546	defense response to symbiont	37/1137	304/18614	4.93885e-05	0.00137977	0.00120831	DHX36/ZNFX1/PQBP1/C1QBP/CARD8/G3BP1/HSP90AA1/EXOSC5/TRIM28/PTPRC/NLRP1/DDX56/OAS1/PHB2/ABCF3/BST2/IFI16/IRF2/CNOT7/IFI6/EIF2AK2/GBP1/ISG20/DDX1/DHX9/STAT2/IFI44L/CASP1/PHB1/ATG5/APOBEC3G/SELENOK/PLSCR1/TRIM8/POLR3C/ILF3/DHX15	37
GO:0032543	mitochondrial translation	21/1137	132/18614	4.95227e-05	0.00137977	0.00120831	MRPL21/MRPS5/MRPL11/MRPL39/DAP3/C1QBP/MRPL22/MRPL24/MRPS15/MRPL13/HARS1/MRPS35/MRPL55/QRSL1/MRPL42/MTIF3/MRPL47/MRPL48/AURKAIP1/TUFM/RPUSD3	21
GO:0070198	protein localization to chromosome, telomeric region	9/1137	30/18614	5.09496e-05	0.00141136	0.00123598	ATRX/CCT3/TNKS2/CCT6A/CCT8/CCT7/GNL3/CCT4/CCT5	9
GO:1904358	positive regulation of telomere maintenance via telomere lengthening	10/1137	37/18614	5.30862e-05	0.00146215	0.00128045	DHX36/ATM/CCT3/TNKS2/HNRNPA1/CCT6A/CCT8/CCT7/CCT4/CCT5	10
GO:0046824	positive regulation of nucleocytoplasmic transport	13/1137	60/18614	5.38912e-05	0.00147589	0.00129249	DMAP1/TARDBP/KHDRBS1/HSP90AA1/TPR/TRIM28/RBM22/UBR5/CPSF6/PRKACA/DHX9/RAN/PRKCD	13
GO:0006626	protein targeting to mitochondrion	18/1137	104/18614	5.4391e-05	0.00148116	0.0012971	PDCD5/UBE2D3/MTERF4/TOMM7/HSP90AA1/HAX1/TOMM20/TIMM17A/DNAJC19/HSPD1/AIP/SAMM50/TIMM22/TOMM22/PMPCB/ATP5IF1/TIMM23/TIMM50	18
GO:0050853	B cell receptor signaling pathway	15/1137	77/18614	5.51705e-05	0.00149394	0.0013083	CD79A/PTPRC/PRKCH/LPXN/NFKB1/LYN/IGHM/MS4A1/IGHD/CD22/ITK/BLNK/CD300A/LCK/BAX	15
GO:1903900	regulation of viral life cycle	22/1137	143/18614	5.5848e-05	0.00150384	0.00131697	ZNFX1/PPID/MPHOSPH8/TRIM28/HLA-DRB1/OAS1/TOP2B/BST2/IFI16/PKN2/CNOT7/LY6E/LGALS1/EIF2AK2/LGALS9/ISG20/APOBEC3G/CD74/PLSCR1/SRPK2/TRIM8/ILF3	22
GO:0045069	regulation of viral genome replication	16/1137	86/18614	5.66758e-05	0.00151765	0.00132906	ZNFX1/PPID/MPHOSPH8/TRIM28/OAS1/TOP2B/BST2/IFI16/PKN2/CNOT7/EIF2AK2/ISG20/APOBEC3G/PLSCR1/SRPK2/ILF3	16
GO:0019693	ribose phosphate metabolic process	51/1137	473/18614	5.70625e-05	0.00151956	0.00133074	SUCLG2/ATP5PO/GMPS/RNASEH2B/NDUFAB1/HINT1/NDUFV1/ATP5MC2/SUCLG1/ATP5PB/ATP5MF/PMVK/NDUFB10/NDUFB2/ADA/PRPSAP2/SDHC/NDUFA12/ATP5PD/HSPA8/IMPDH2/ATP5MC1/UCKL1/NDUFB11/APRT/PDHA1/NME7/NDUFS2/ACOT9/NDUFB4/NDUFC1/GART/COASY/ATP5IF1/EIF6/NDUFS6/ACSL5/ATIC/PARP1/NDUFB6/NUDT5/ATP5F1A/RAN/GIMAP7/ATP5MC3/ACSS1/PDHB/ATP5F1C/NDUFA3/ATP5F1D/PANK4	51
GO:0140747	regulation of ncRNA transcription	8/1137	24/18614	5.76308e-05	0.00152627	0.00133661	NOP53/LARP7/ATRX/ZNF143/MARS1/PWP1/NCL/PIH1D1	8
GO:0032259	methylation	42/1137	365/18614	5.91558e-05	0.00155809	0.00136448	DMAP1/EMG1/CHTOP/SNRPF/LARP7/FBL/MPHOSPH8/BOD1L1/SNRPE/MBD2/ASH2L/HSD17B10/SNRPG/TRMT112/NFYC/SNRPD1/SUZ12/SNRPD2/TRIM28/TPMT/ATRX/MTO1/ARID4A/RNF20/ARID4B/NSD1/SMYD3/DPY30/NSUN5/METTL5/CLNS1A/CTR9/PHF1/MTRR/COQ5/BTG1/PARP1/CXXC1/BUD23/KMT2C/SPOCD1/PIH1D1	42
GO:0140053	mitochondrial gene expression	24/1137	164/18614	5.98285e-05	0.00156725	0.0013725	MRPL21/MRPS5/MRPL11/MRPL39/DAP3/C1QBP/MRPL22/MRPL24/MTERF4/HSD17B10/MRPS15/MRPL13/HARS1/MRPS35/MRPL55/QRSL1/MRPL42/FASTK/MTIF3/MRPL47/MRPL48/AURKAIP1/TUFM/RPUSD3	24
GO:0007008	outer mitochondrial membrane organization	6/1137	13/18614	6.06121e-05	0.0015707	0.00137552	PDCD5/TOMM7/HSP90AA1/TOMM20/SAMM50/TOMM22	6
GO:0045040	protein insertion into mitochondrial outer membrane	6/1137	13/18614	6.06121e-05	0.0015707	0.00137552	PDCD5/TOMM7/HSP90AA1/TOMM20/SAMM50/TOMM22	6
GO:0043487	regulation of RNA stability	28/1137	207/18614	6.41276e-05	0.00165292	0.00144752	DHX36/VIM/HNRNPU/CNOT2/TARDBP/RBM10/EXOSC5/FUS/HNRNPD/TUT4/PABPC4/EXOSC9/NPM1/FASTK/CNOT7/CIRBP/EXOSC8/DDX49/PUM2/MLH1/DHX9/UPF1/APEX1/CNOT1/CELF1/PRKCD/TENT2/FXR1	28
GO:1904356	regulation of telomere maintenance via telomere lengthening	13/1137	61/18614	6.47003e-05	0.00165881	0.00145268	DHX36/HNRNPU/ATM/EXOSC10/CCT3/TNKS2/HNRNPA1/CCT6A/CCT8/CCT7/PARP1/CCT4/CCT5	13
GO:0019886	antigen processing and presentation of exogenous peptide antigen via MHC class II	9/1137	31/18614	6.79237e-05	0.00172255	0.0015085	HLA-DMA/HLA-DMB/HLA-DRB1/HLA-DPB1/HLA-DQA1/HLA-DPA1/HLA-DQB1/CD74/HLA-DRA	9
GO:0032435	negative regulation of proteasomal ubiquitin-dependent protein catabolic process	10/1137	38/18614	6.81308e-05	0.00172255	0.0015085	NOP53/EIF3H/UCHL5/RPL11/SDCBP/HSP90AB1/FHIT/UBXN1/WAC/USP7	10
GO:0009259	ribonucleotide metabolic process	50/1137	464/18614	6.82588e-05	0.00172255	0.0015085	SUCLG2/ATP5PO/GMPS/RNASEH2B/NDUFAB1/HINT1/NDUFV1/ATP5MC2/SUCLG1/ATP5PB/ATP5MF/PMVK/NDUFB10/NDUFB2/ADA/SDHC/NDUFA12/ATP5PD/HSPA8/IMPDH2/ATP5MC1/UCKL1/NDUFB11/APRT/PDHA1/NME7/NDUFS2/ACOT9/NDUFB4/NDUFC1/GART/COASY/ATP5IF1/EIF6/NDUFS6/ACSL5/ATIC/PARP1/NDUFB6/NUDT5/ATP5F1A/RAN/GIMAP7/ATP5MC3/ACSS1/PDHB/ATP5F1C/NDUFA3/ATP5F1D/PANK4	50
GO:0022409	positive regulation of cell-cell adhesion	38/1137	321/18614	7.17259e-05	0.00180062	0.00157687	PHF10/RASAL3/SART1/CD3E/ADA/PTPRC/SKAP1/HLA-DMA/HLA-DMB/LEF1/HLA-DRB1/SMARCD2/RPS3/HLA-DPB1/VAV1/TNFSF13B/AIF1/SMARCC2/IL7R/CORO1A/CYRIB/HSPD1/LYN/ITGA4/TNFRSF14/HLA-DQA1/LGALS1/CD44/LGALS9/HLA-DPA1/HSPH1/CCDC88B/RIPK2/HLA-DQB1/LCK/CD74/SELENOK/HLA-DRA	38
GO:0017148	negative regulation of translation	34/1137	276/18614	7.73156e-05	0.0019238	0.00168474	DHX36/EIF4E2/HNRNPU/CNOT2/EIF3E/TARDBP/EXOSC5/HNRNPD/TPR/MRPL13/EIF4A3/TUT4/RPL13A/RPS3/RACK1/EXOSC9/DAPK3/CNOT7/NCL/CIRBP/EIF2AK2/EXOSC8/EIF6/MLH1/DHX9/UPF1/EIF4EBP1/CNOT1/CELF1/EIF2S1/EPRS1/GZMB/FXR1/ILF3	34
GO:0033120	positive regulation of RNA splicing	11/1137	46/18614	7.7431e-05	0.0019238	0.00168474	RBM22/HSPA8/SRSF5/SLC38A2/SF3B4/NCL/CIRBP/TRA2B/CLNS1A/SNRNP70/RBMX	11
GO:0043628	regulatory ncRNA 3'-end processing	7/1137	19/18614	8.18591e-05	0.00202339	0.00177196	LARP7/FBL/EXOSC5/RPS21/EXOSC10/EXOSC9/EXOSC8	7
GO:0006839	mitochondrial transport	26/1137	189/18614	8.70296e-05	0.00214022	0.00187427	PDCD5/UBE2D3/MTERF4/TOMM7/HSP90AA1/HAX1/TOMM20/HEBP2/ALKBH7/TIMM17A/DNAJC19/HSPD1/AIP/SAMM50/TIMM22/ACAA2/TOMM22/PMPCB/ATP5IF1/RHOT1/BLOC1S2/SLC25A6/TIMM23/BAX/TIMM50/GZMB	26
GO:0009150	purine ribonucleotide metabolic process	48/1137	445/18614	9.24751e-05	0.00226259	0.00198143	SUCLG2/ATP5PO/GMPS/NDUFAB1/HINT1/NDUFV1/ATP5MC2/SUCLG1/ATP5PB/ATP5MF/PMVK/NDUFB10/NDUFB2/ADA/SDHC/NDUFA12/ATP5PD/HSPA8/IMPDH2/ATP5MC1/NDUFB11/APRT/PDHA1/NME7/NDUFS2/ACOT9/NDUFB4/NDUFC1/GART/COASY/ATP5IF1/EIF6/NDUFS6/ACSL5/ATIC/PARP1/NDUFB6/NUDT5/ATP5F1A/RAN/GIMAP7/ATP5MC3/ACSS1/PDHB/ATP5F1C/NDUFA3/ATP5F1D/PANK4	48
GO:0061013	regulation of mRNA catabolic process	28/1137	212/18614	9.78101e-05	0.00238103	0.00208516	DHX36/VIM/HNRNPU/CNOT2/TARDBP/RBM10/RBM8A/EXOSC5/FUS/HNRNPD/EIF4A3/TUT4/PABPC4/EXOSC9/NPM1/FASTK/CNOT7/CIRBP/EXOSC8/PUM2/MLH1/DHX9/UPF1/APEX1/CNOT1/CELF1/PRKCD/FXR1	28
GO:0048525	negative regulation of viral process	16/1137	90/18614	0.000100006	0.00242226	0.00212126	LARP7/ZNFX1/MPHOSPH8/TRIM28/UBP1/OAS1/BST2/IFI16/LY6E/EIF2AK2/ISG20/APOBEC3G/PLSCR1/SRPK2/TRIM8/ILF3	16
GO:0006177	GMP biosynthetic process	6/1137	14/18614	0.000100589	0.0024242	0.00212296	GMPS/ADA/IMPDH2/APRT/GART/ATIC	6
GO:0002478	antigen processing and presentation of exogenous peptide antigen	10/1137	40/18614	0.000109261	0.00262008	0.0022945	HLA-DMA/HLA-DMB/HLA-DRB1/HLA-DPB1/HLA-DQA1/HLA-F/HLA-DPA1/HLA-DQB1/CD74/HLA-DRA	10
GO:0045071	negative regulation of viral genome replication	12/1137	56/18614	0.000116106	0.00274849	0.00240695	ZNFX1/MPHOSPH8/TRIM28/OAS1/BST2/IFI16/EIF2AK2/ISG20/APOBEC3G/PLSCR1/SRPK2/ILF3	12
GO:0065002	intracellular protein transmembrane transport	12/1137	56/18614	0.000116106	0.00274849	0.00240695	TOMM7/SEC63/SEC61G/TOMM20/PEX16/TIMM17A/DNAJC19/HSPD1/LONP2/TIMM23/TIMM50/SEC61B	12
GO:0051204	protein insertion into mitochondrial membrane	9/1137	33/18614	0.000116326	0.00274849	0.00240695	PDCD5/TOMM7/HSP90AA1/TOMM20/SAMM50/TIMM22/TOMM22/BAX/GZMB	9
GO:0002696	positive regulation of leukocyte activation	42/1137	377/18614	0.000122724	0.00288551	0.00252695	PHF10/RASAL3/SART1/CD3E/ADA/PTPRC/HLA-DMA/HLA-DMB/LEF1/PRKDC/HLA-DRB1/SMARCD2/CD2/RPS3/HLA-DPB1/VAV1/TNFSF13B/AIF1/SMARCC2/SNX4/IL7R/CORO1A/CYRIB/HSPD1/LYN/TNFRSF14/HLA-DQA1/HLA-F/LGALS1/TYROBP/LGALS9/MLH1/HLA-DPA1/HSPH1/CCDC88B/RIPK2/HLA-DQB1/LCK/CD74/SELENOK/HLA-DRA/BLOC1S6	42
GO:0006399	tRNA metabolic process	26/1137	193/18614	0.000123447	0.00288841	0.00252949	DUS1L/FARSB/ADAT2/RPP30/HSD17B10/ELP2/TRMT112/SSB/THUMPD1/LSM6/MTO1/EXOSC10/TSEN54/MARS1/POP4/HARS1/EXOSC9/SARS1/QRSL1/LARS1/EXOSC8/DDX1/DICER1/POLR2L/EPRS1/ZCCHC7	26
GO:0072331	signal transduction by p53 class mediator	24/1137	173/18614	0.000140436	0.00327006	0.00286372	NOP53/HINT1/RPS15/RPL23/RPS20/RPS7/RPL37/RPL11/PSMD10/RPL5/ATRX/ATM/RPS27L/ING4/IFI16/EIF5A/FHIT/PYHIN1/NBN/CD44/USP7/CD74/BAX/DDX5	24
GO:0019884	antigen processing and presentation of exogenous antigen	11/1137	49/18614	0.000142876	0.00331088	0.00289946	HLA-DMA/HLA-DMB/HLA-DRB1/HLA-DPB1/PSME1/HLA-DQA1/HLA-F/HLA-DPA1/HLA-DQB1/CD74/HLA-DRA	11
GO:0006986	response to unfolded protein	21/1137	142/18614	0.000145364	0.0033524	0.00293582	ABCA7/HSP90AA1/DNAJB1/HSPA8/UFL1/SERP1/ERLEC1/RACK1/DAXX/HSP90AB1/HSPA9/CREBRF/HSPD1/CREB3/EIF2AK2/HSPH1/DERL1/BAX/EIF2S1/PTPN2/DNAJA1	21
GO:0043488	regulation of mRNA stability	26/1137	195/18614	0.000146319	0.00335837	0.00294105	DHX36/VIM/HNRNPU/CNOT2/TARDBP/RBM10/EXOSC5/FUS/HNRNPD/TUT4/PABPC4/EXOSC9/NPM1/FASTK/CNOT7/CIRBP/EXOSC8/PUM2/MLH1/DHX9/UPF1/APEX1/CNOT1/CELF1/PRKCD/FXR1	26
GO:1904666	regulation of ubiquitin protein ligase activity	8/1137	27/18614	0.000147613	0.00337202	0.002953	RPS15/RPL23/RPS20/RPS7/RPL37/RPL11/RPL5/BTRC	8
GO:0032212	positive regulation of telomere maintenance via telomerase	9/1137	34/18614	0.000149695	0.00340344	0.00298052	ATM/CCT3/TNKS2/HNRNPA1/CCT6A/CCT8/CCT7/CCT4/CCT5	9
GO:0035966	response to topologically incorrect protein	23/1137	164/18614	0.000162672	0.00367624	0.00321942	ABCA7/HSP90AA1/DNAJB1/HSPA8/UFL1/SERP1/ERLEC1/RACK1/DAXX/HSP90AB1/HSPA9/CREBRF/AUP1/HSPD1/CREB3/EIF2AK2/HSPH1/DERL1/ATXN3/BAX/EIF2S1/PTPN2/DNAJA1	23
GO:0060368	regulation of Fc receptor mediated stimulatory signaling pathway	5/1137	10/18614	0.000163982	0.00367624	0.00321942	APPL1/PTPRC/LYN/RABGEF1/PLSCR1	5
GO:0071028	nuclear mRNA surveillance	5/1137	10/18614	0.000163982	0.00367624	0.00321942	EXOSC5/EXOSC10/EXOSC9/EXOSC8/ZCCHC7	5
GO:0042306	regulation of protein import into nucleus	12/1137	58/18614	0.000165627	0.00369594	0.00323667	DMAP1/TARDBP/HSP90AA1/TPR/TRIM28/RBM22/UBR5/NUP54/CHP1/RAN/PRKCD/NOLC1	12
GO:0045292	mRNA cis splicing, via spliceosome	10/1137	42/18614	0.000169652	0.0037683	0.00330004	WBP4/PRPF40A/SART1/SNRPC/RBM22/DDX23/CWC15/RBM17/CLNS1A/SNRNP200	10
GO:0046034	ATP metabolic process	28/1137	219/18614	0.000171492	0.00379171	0.00332054	ATP5PO/NDUFAB1/NDUFV1/ATP5MC2/ATP5PB/ATP5MF/NDUFB10/NDUFB2/SDHC/NDUFA12/ATP5PD/HSPA8/ATP5MC1/NDUFB11/NDUFS2/NDUFB4/NDUFC1/ATP5IF1/EIF6/NDUFS6/PARP1/NDUFB6/NUDT5/ATP5F1A/ATP5MC3/ATP5F1C/NDUFA3/ATP5F1D	28
GO:0042113	B cell activation	33/1137	276/18614	0.000173202	0.00381202	0.00333833	IGBP1/PHF14/CD79A/ADA/PTPRC/LEF1/ATM/PRKDC/PHB2/KLF6/TNFSF13B/TBC1D10C/TOP2B/BST2/IL7R/HSPD1/LYN/ITGA4/LGALS1/MS4A1/ID2/NBN/TYROBP/CD22/MLH1/BLNK/CD300A/PHB1/CD74/BAX/PRKCD/PTPN2/HDAC9	33
GO:0002495	antigen processing and presentation of peptide antigen via MHC class II	9/1137	35/18614	0.000190682	0.00417766	0.00365853	HLA-DMA/HLA-DMB/HLA-DRB1/HLA-DPB1/HLA-DQA1/HLA-DPA1/HLA-DQB1/CD74/HLA-DRA	9
GO:1903313	positive regulation of mRNA metabolic process	23/1137	166/18614	0.000195293	0.00424734	0.00371955	DHX36/HNRNPU/CNOT2/TARDBP/EXOSC5/HNRNPD/TUT4/HSPA8/EXOSC9/SF3B4/CNOT7/NCL/CIRBP/TRA2B/EXOSC8/CLNS1A/MLH1/DHX9/UPF1/SNRNP70/RBMX/CNOT1/CELF1	23
GO:0010257	NADH dehydrogenase complex assembly	12/1137	59/18614	0.000196505	0.00424734	0.00371955	NDUFAB1/NDUFB10/NDUFB2/NDUFA12/NDUFB11/NDUFAF6/NDUFS2/NDUFB4/NDUFC1/NDUFB6/NDUFA3/TMEM126B	12
GO:0032981	mitochondrial respiratory chain complex I assembly	12/1137	59/18614	0.000196505	0.00424734	0.00371955	NDUFAB1/NDUFB10/NDUFB2/NDUFA12/NDUFB11/NDUFAF6/NDUFS2/NDUFB4/NDUFC1/NDUFB6/NDUFA3/TMEM126B	12
GO:0090503	RNA phosphodiester bond hydrolysis, exonucleolytic	10/1137	43/18614	0.000209084	0.00449904	0.00393997	CNOT2/EXOSC5/EXOSC10/EXOSC9/CNOT7/EXOSC8/ISG20/CPSF3/CNOT1/XRN2	10
GO:0002218	activation of innate immune response	29/1137	233/18614	0.00021152	0.00453123	0.00396817	NOP53/APPL1/CYBA/SFPQ/ZNFX1/PQBP1/C1QBP/RPS6KA3/HSP90AA1/PRKDC/NLRP1/OAS1/PHB2/PAK2/IFI16/IFI35/HSPD1/LYN/PYHIN1/TYROBP/PUM2/MAP3K7/CD300A/CASP1/PHB1/PAK1/RIPK2/CYLD/ANKRD17	29
GO:1901796	regulation of signal transduction by p53 class mediator	17/1137	106/18614	0.000227261	0.00484688	0.0042446	NOP53/RPS15/RPL23/RPS20/RPS7/RPL37/RPL11/PSMD10/RPL5/ATM/ING4/EIF5A/PYHIN1/CD44/USP7/CD74/DDX5	17
GO:0034502	protein localization to chromosome	18/1137	116/18614	0.000230314	0.00489037	0.00428268	SPIDR/ATRX/CHMP7/LEF1/IK/VRK1/SGF29/CCT3/TNKS2/CCT6A/CCT8/CCT7/GNL3/PPHLN1/CCT4/CCT5/PIH1D1/RCC2	18
GO:0000470	maturation of LSU-rRNA	7/1137	22/18614	0.000235662	0.00493865	0.00432496	RPL35/NSA2/DDX18/RPL7/RPF1/EIF6/WDR12	7
GO:0032928	regulation of superoxide anion generation	7/1137	22/18614	0.000235662	0.00493865	0.00432496	CYBA/SOD1/AATF/GSTP1/HVCN1/TYROBP/PRKCD	7
GO:0051444	negative regulation of ubiquitin-protein transferase activity	7/1137	22/18614	0.000235662	0.00493865	0.00432496	RPS15/RPL23/RPS20/RPS7/RPL37/RPL11/RPL5	7
GO:0035520	monoubiquitinated protein deubiquitination	9/1137	36/18614	0.000240587	0.00502004	0.00439623	TAF2/SGF29/SUPT20H/USP16/USP1/TAF12/USP7/ENY2/ATXN3	9
GO:0050863	regulation of T cell activation	41/1137	377/18614	0.000246038	0.00511165	0.00447646	PHF10/RASAL3/SART1/SOD1/CD3E/ADA/PTPRC/HLA-DMA/HLA-DMB/LEF1/HLA-DRB1/SMARCD2/CD2/RPS3/HLA-DPB1/VAV1/TNFSF13B/AIF1/SMARCC2/IL7R/CORO1A/CYRIB/HSPD1/LYN/TNFRSF14/HLA-DQA1/LGALS1/PRELID1/TCF7/LGALS9/HLA-DPA1/HSPH1/CD300A/CCDC88B/RIPK2/HLA-DQB1/LCK/CD74/SELENOK/HLA-DRA/PTPN2	41
GO:0090501	RNA phosphodiester bond hydrolysis	22/1137	158/18614	0.000248127	0.00513293	0.0044951	CNOT2/RPP30/EXOSC5/NHP2/RPS21/EXOSC10/POP4/CPSF6/EXOSC9/TBL3/CNOT7/RNASET2/CPSF1/BMS1/EXOSC8/ISG20/APEX1/DICER1/CPSF3/CNOT1/XRN2/KRI1	22
GO:0000387	spliceosomal snRNP assembly	11/1137	52/18614	0.000250327	0.0051563	0.00451556	SNRPF/PRPF3/SNRPE/SART1/SNRPC/SNRPG/SNRPD1/SNRPD2/SART3/PRPF31/CLNS1A	11
GO:0046822	regulation of nucleocytoplasmic transport	17/1137	107/18614	0.00025509	0.0052253	0.00457599	DMAP1/TARDBP/KHDRBS1/HSP90AA1/TPR/TRIM28/RBM22/UBR5/CPSF6/NUP54/PRKACA/CHP1/DHX9/RAN/BARD1/PRKCD/NOLC1	17
GO:0000469	cleavage involved in rRNA processing	8/1137	29/18614	0.000255845	0.0052253	0.00457599	NHP2/RPS21/EXOSC10/EXOSC9/TBL3/BMS1/EXOSC8/KRI1	8
GO:1903037	regulation of leukocyte cell-cell adhesion	41/1137	378/18614	0.000260139	0.00528983	0.0046325	PHF10/RASAL3/SART1/CD3E/ADA/PTPRC/SKAP1/HLA-DMA/HLA-DMB/LEF1/HLA-DRB1/SMARCD2/RPS3/HLA-DPB1/VAV1/TNFSF13B/AIF1/SMARCC2/IL7R/CORO1A/CYRIB/HSPD1/LYN/ITGA4/TNFRSF14/HLA-DQA1/LGALS1/CD44/LGALS9/HLA-DPA1/HSPH1/CD300A/CCDC88B/RIPK2/HLA-DQB1/LCK/CD74/SELENOK/HLA-DRA/PTPN2/WNK1	41
GO:0007159	leukocyte cell-cell adhesion	44/1137	415/18614	0.000261199	0.00528983	0.0046325	PHF10/RASAL3/SART1/CD3E/ADA/PTPRC/SKAP1/HLA-DMA/HLA-DMB/LEF1/HLA-DRB1/SMARCD2/RPS3/HLA-DPB1/VAV1/TNFSF13B/AIF1/SMARCC2/IL7R/EZR/CORO1A/CYRIB/HSPD1/LYN/ITGA4/TNFRSF14/HLA-DQA1/LGALS1/CD44/LGALS9/HLA-DPA1/HSPH1/ITGAL/CD300A/CCDC88B/RIPK2/STK10/HLA-DQB1/LCK/CD74/SELENOK/HLA-DRA/PTPN2/WNK1	44
GO:0006282	regulation of DNA repair	27/1137	214/18614	0.000276144	0.00556909	0.00487706	PHF10/DMAP1/TAF2/MEAF6/UCHL5/FUS/TRIM28/SPIDR/PRKDC/SMARCD2/UBR5/DEK/SGF29/RPS3/SMARCC2/SUPT20H/SMCHD1/MORF4L1/USP1/TAF12/DHX9/PARP1/ENY2/KAT7/BARD1/RUVBL1/CUL4A	27
GO:0034427	nuclear-transcribed mRNA catabolic process, exonucleolytic, 3'-5'	5/1137	11/18614	0.000285508	0.00568657	0.00497994	EXOSC5/SKIC3/SKIC2/EXOSC9/EXOSC8	5
GO:0071044	histone mRNA catabolic process	5/1137	11/18614	0.000285508	0.00568657	0.00497994	SSB/ATM/EXOSC10/UPF1/TENT2	5
GO:0075522	IRES-dependent viral translational initiation	5/1137	11/18614	0.000285508	0.00568657	0.00497994	EIF3A/EIF2D/SSB/EIF3F/EIF3D	5
GO:0044772	mitotic cell cycle phase transition	48/1137	467/18614	0.000289486	0.00574208	0.00502855	NOP53/PHF10/APPL1/RNASEH2B/CCNH/CALM1/DYNC1LI1/TAF2/PSMG2/KHDRBS1/TPR/CUL1/RPS6/CHMP7/PSME2/ATM/PRKDC/SMARCD2/CACUL1/RPS27L/IK/ANAPC11/PHB2/AIF1/SMARCC2/PSME1/ERCC3/CUL5/ID2/NBN/BRD4/ANAPC4/MIIP/WAC/APEX1/CDK17/CCNJL/EIF4EBP1/CPSF3/ANKRD17/BARD1/RBL2/PLRG1/CRLF3/RGCC/CDC14A/CUL4A/RCC2	48
GO:0032210	regulation of telomere maintenance via telomerase	11/1137	53/18614	0.000298674	0.0058808	0.00515003	HNRNPU/ATM/EXOSC10/CCT3/TNKS2/HNRNPA1/CCT6A/CCT8/CCT7/CCT4/CCT5	11
GO:0002504	antigen processing and presentation of peptide or polysaccharide antigen via MHC class II	9/1137	37/18614	0.000300855	0.0058808	0.00515003	HLA-DMA/HLA-DMB/HLA-DRB1/HLA-DPB1/HLA-DQA1/HLA-DPA1/HLA-DQB1/CD74/HLA-DRA	9
GO:0090151	establishment of protein localization to mitochondrial membrane	9/1137	37/18614	0.000300855	0.0058808	0.00515003	PDCD5/TOMM7/HSP90AA1/TOMM20/SAMM50/TIMM22/TOMM22/BAX/GZMB	9
GO:0019058	viral life cycle	36/1137	320/18614	0.000301361	0.0058808	0.00515003	CHMP2B/ZNFX1/PPID/MPHOSPH8/TRIM28/CHMP7/HLA-DRB1/DEK/HSPA8/DDX56/OAS1/TOP2B/BST2/HSP90AB1/SLC3A2/IFI16/SIVA1/PKN2/RPSA/CNOT7/TNFRSF14/LY6E/LGALS1/EEF1A1/EIF2AK2/LGALS9/ISG20/PHB1/ATG5/ATG16L2/APOBEC3G/CD74/PLSCR1/SRPK2/TRIM8/ILF3	36
GO:0050867	positive regulation of cell activation	42/1137	394/18614	0.000318479	0.0061898	0.00542064	PHF10/RASAL3/SART1/CD3E/ADA/PTPRC/HLA-DMA/HLA-DMB/LEF1/PRKDC/HLA-DRB1/SMARCD2/CD2/RPS3/HLA-DPB1/VAV1/TNFSF13B/AIF1/SMARCC2/SNX4/IL7R/CORO1A/CYRIB/HSPD1/LYN/TNFRSF14/HLA-DQA1/HLA-F/LGALS1/TYROBP/LGALS9/MLH1/HLA-DPA1/HSPH1/CCDC88B/RIPK2/HLA-DQB1/LCK/CD74/SELENOK/HLA-DRA/BLOC1S6	42
GO:0039694	viral RNA genome replication	8/1137	30/18614	0.000330352	0.00639477	0.00560014	MPHOSPH8/TRIM28/DDX56/TOP2B/PHB1/ATG5/ATG16L2/APOBEC3G	8
GO:0051656	establishment of organelle localization	46/1137	445/18614	0.000338451	0.00652534	0.00571449	CHMP2B/NUP88/HNRNPU/PREB/PCM1/RPS15/NUDC/KPNB1/CHMP7/SDCBP/ATM/SDAD1/NSFL1C/CENPC/SNX4/TRAPPC6A/SUN2/NPM1/EZR/LYN/ITGA4/SEPTIN1/KIF22/MAP4/MAP1B/ABCE1/IRAG2/DYNC1H1/RHOT1/LGALS9/EIF6/BLOC1S2/MLH1/PAFAH1B1/TRAPPC2L/CD300A/RABGEF1/FAM91A1/TRAPPC2/RAN/PEF1/SYNE2/SPG11/COPG1/TUBA1A/BLOC1S6	46
GO:0016074	sno(s)RNA metabolic process	6/1137	17/18614	0.000353676	0.00676476	0.00592415	LARP7/FBL/EXOSC5/EXOSC10/ZCCHC7/NOLC1	6
GO:0070200	establishment of protein localization to telomere	6/1137	17/18614	0.000353676	0.00676476	0.00592415	CCT3/CCT6A/CCT8/CCT7/CCT4/CCT5	6
GO:2000058	regulation of ubiquitin-dependent protein catabolic process	23/1137	173/18614	0.000359542	0.00684978	0.00599861	NOP53/EIF3H/PDCL3/RPL23/RPS7/UCHL5/RPL11/PSMD10/CSNK1A1/RPL5/SDCBP/UFL1/RACK1/HSP90AB1/NUB1/CCDC22/FHIT/UBE3A/UBXN1/PYHIN1/WAC/USP7/HECTD1	23
GO:0044743	protein transmembrane import into intracellular organelle	9/1137	38/18614	0.00037308	0.0070797	0.00619996	TOMM7/TOMM20/PEX16/TIMM17A/DNAJC19/HSPD1/LONP2/TIMM23/TIMM50	9
GO:0006356	regulation of transcription by RNA polymerase I	10/1137	46/18614	0.000376191	0.00711076	0.00622715	NOP53/LYAR/DEK/MARS1/PWP1/SF3B1/NCL/WDR75/POLR2L/PIH1D1	10
GO:0097193	intrinsic apoptotic signaling pathway	34/1137	301/18614	0.000406287	0.00764963	0.00669906	SFPQ/HINT1/TPT1/SOD1/RPS7/RPL11/BCLAF1/CUL1/ATM/PRKDC/HDAC1/RPS27L/RPS3/RACK1/IFI16/EIF5A/FHIT/CUL5/NBN/IFI6/CREB3/CD44/MLH1/PARP1/CYLD/LCK/CD74/SELENOK/BAX/PRKCD/PTPN2/DDX5/DNAJA1/CUL4A	34
GO:1902600	proton transmembrane transport	20/1137	143/18614	0.000439102	0.00823469	0.00721143	ATP5PO/ATP5MC2/ATP5PB/ATP5MF/COX5B/ATP5PD/ATP5MC1/SURF1/PHB2/COX5A/COX7B/CYC1/COX4I1/HVCN1/CHP1/ATP5F1A/ATP5MC3/ATP5F1C/ATP5F1D/UQCRC1	20
GO:1903320	regulation of protein modification by small protein conjugation or removal	30/1137	255/18614	0.000441062	0.00823469	0.00721143	NOP53/RPS2/RPS15/RPL23/RPS20/HSP90AA1/RPS7/RPL37/RPL11/PSMD10/RPL5/UBR5/SART3/UFL1/RPS3/DAXX/HSP90AB1/GPS1/UBE3A/UBXN1/ARRDC3/CHP1/GNL3/ATG5/DERL1/RIPK2/PEF1/UBA2/BTRC/DNAJA1	30
GO:0071383	cellular response to steroid hormone stimulus	26/1137	209/18614	0.000442487	0.00823469	0.00721143	ATP2B1/TRIP4/HNRNPU/CNOT2/PTGES3/HDAC1/UBR5/HSPA8/UFL1/PHB2/NR3C1/DAXX/UBE3A/PCK2/AKR1C3/SMYD3/TFPI/PARP1/PHB1/PAK1/SAFB/ATP5F1A/RAN/CNOT1/DDX5/DNAJA1	26
GO:0042307	positive regulation of protein import into nucleus	9/1137	39/18614	0.000459009	0.00850932	0.00745193	DMAP1/TARDBP/HSP90AA1/TPR/TRIM28/RBM22/UBR5/RAN/PRKCD	9
GO:0042100	B cell proliferation	16/1137	103/18614	0.000496458	0.0091683	0.00802902	CD79A/ADA/PTPRC/LEF1/ATM/TNFSF13B/IL7R/HSPD1/LYN/MS4A1/TYROBP/CD22/CD300A/CD74/BAX/PRKCD	16
GO:0002431	Fc receptor mediated stimulatory signaling pathway	8/1137	32/18614	0.000532371	0.00971981	0.00851199	APPL1/PTPRC/VAV1/LYN/RABGEF1/PAK1/PLSCR1/PRKCD	8
GO:0048026	positive regulation of mRNA splicing, via spliceosome	8/1137	32/18614	0.000532371	0.00971981	0.00851199	HSPA8/SF3B4/NCL/CIRBP/TRA2B/CLNS1A/SNRNP70/RBMX	8
GO:0071353	cellular response to interleukin-4	8/1137	32/18614	0.000532371	0.00971981	0.00851199	LEF1/PARP14/IMPDH2/RPL3/HSP90AB1/CORO1A/TCF7/PTPN2	8
GO:0046651	lymphocyte proliferation	34/1137	306/18614	0.000547907	0.0099657	0.00872733	RASAL3/CD3E/CD79A/ADA/PTPRC/RPS6/HLA-DMB/LEF1/ATM/HLA-DRB1/IMPDH2/RPS3/HLA-DPB1/TNFSF13B/AIF1/IL7R/CORO1A/HSPD1/LYN/TNFRSF14/MS4A1/LST1/TYROBP/CD22/LGALS9/HLA-DPA1/PSMB10/CD300A/CCDC88B/RIPK2/CD74/SELENOK/BAX/PRKCD	34

## Sheet: Upregulated
Upregulated GOs
ID	Description	GeneRatio	BgRatio	pvalue	p.adjust	qvalue	geneID	Count
GO:0007596	blood coagulation	51/1061	224/18614	8.09477e-18	4.32908e-14	3.64861e-14	TSPAN32/MFSD2B/CD9/MMRN1/MYL9/GP6/DMTN/HPSE/ACTG1/P2RY12/FERMT3/VWF/F2R/ANO6/SERPING1/TLN1/F8/DGKG/PROS1/PLEK/TBXA2R/GNAQ/DGKD/SELP/ITGA2/PRDX2/HBB/PLA2G4A/SYK/CLIC1/PRKCA/PAPSS2/GP1BA/MPL/P2RX1/ALOX12/THBS1/GP9/VCL/CD36/SH2B3/ABAT/GNA12/ACTB/MYH9/MPIG6B/AP3B1/DGKZ/FLNA/UBASH3B/NFE2L2	51
GO:0050817	coagulation	51/1061	229/18614	2.19348e-17	4.75492e-14	4.00751e-14	TSPAN32/MFSD2B/CD9/MMRN1/MYL9/GP6/DMTN/HPSE/ACTG1/P2RY12/FERMT3/VWF/F2R/ANO6/SERPING1/TLN1/F8/DGKG/PROS1/PLEK/TBXA2R/GNAQ/DGKD/SELP/ITGA2/PRDX2/HBB/PLA2G4A/SYK/CLIC1/PRKCA/PAPSS2/GP1BA/MPL/P2RX1/ALOX12/THBS1/GP9/VCL/CD36/SH2B3/ABAT/GNA12/ACTB/MYH9/MPIG6B/AP3B1/DGKZ/FLNA/UBASH3B/NFE2L2	51
GO:0007599	hemostasis	51/1061	230/18614	2.66731e-17	4.75492e-14	4.00751e-14	TSPAN32/MFSD2B/CD9/MMRN1/MYL9/GP6/DMTN/HPSE/ACTG1/P2RY12/FERMT3/VWF/F2R/ANO6/SERPING1/TLN1/F8/DGKG/PROS1/PLEK/TBXA2R/GNAQ/DGKD/SELP/ITGA2/PRDX2/HBB/PLA2G4A/SYK/CLIC1/PRKCA/PAPSS2/GP1BA/MPL/P2RX1/ALOX12/THBS1/GP9/VCL/CD36/SH2B3/ABAT/GNA12/ACTB/MYH9/MPIG6B/AP3B1/DGKZ/FLNA/UBASH3B/NFE2L2	51
GO:0030168	platelet activation	36/1061	133/18614	1.81559e-15	2.42745e-12	2.04589e-12	TSPAN32/MFSD2B/CD9/MMRN1/MYL9/GP6/DMTN/ACTG1/P2RY12/FERMT3/VWF/F2R/TLN1/DGKG/PLEK/GNAQ/DGKD/SELP/HBB/PLA2G4A/SYK/CLIC1/PRKCA/GP1BA/MPL/P2RX1/ALOX12/GP9/VCL/SH2B3/ABAT/ACTB/MYH9/DGKZ/FLNA/UBASH3B	36
GO:0042060	wound healing	70/1061	439/18614	3.85201e-15	4.12011e-12	3.47249e-12	TSPAN32/MFSD2B/CD9/MMRN1/CNN2/MACF1/MYL9/GP6/CD151/DMTN/HPSE/ACTG1/CHMP6/TPM1/P2RY12/MAP3K5/FERMT3/VWF/RHOC/F2R/SMAD2/ANO6/RAF1/SERPING1/TLN1/F8/DGKG/CHMP5/PROS1/PLEK/TBXA2R/GNAQ/DGKD/SELP/HIF1A/ITGA2/PRDX2/HBB/CORO1B/SMPD1/ITGB1/PLA2G4A/SYK/CLIC1/PRKCA/PAPSS2/GP1BA/GPX1/MPL/P2RX1/RHOA/ALOX12/ELK3/THBS1/GP9/VCL/CD36/SH2B3/ABAT/GNA12/CD109/TGFB1/ACTB/MYH9/MPIG6B/AP3B1/DGKZ/FLNA/UBASH3B/NFE2L2	70
GO:0034109	homotypic cell-cell adhesion	30/1061	97/18614	7.92821e-15	7.06668e-12	5.9559e-12	TSPAN32/MFSD2B/CD9/MMRN1/MYL9/GP6/DMTN/ACTG1/PKP2/P2RY12/FERMT3/TLN1/PLEK/HBB/CD99/SYK/CLIC1/PRKCA/GP1BA/MPL/ALOX12/ANK3/RDX/VCL/SH2B3/ABAT/ACTB/MYH9/FLNA/UBASH3B	30
GO:0070527	platelet aggregation	26/1061	73/18614	1.08195e-14	8.26611e-12	6.96679e-12	TSPAN32/MFSD2B/CD9/MMRN1/MYL9/GP6/DMTN/ACTG1/P2RY12/FERMT3/TLN1/PLEK/HBB/SYK/CLIC1/PRKCA/GP1BA/MPL/ALOX12/VCL/SH2B3/ABAT/ACTB/MYH9/FLNA/UBASH3B	26
GO:0050878	regulation of body fluid levels	57/1061	361/18614	2.23222e-12	1.49224e-09	1.25768e-09	NR1H2/TSPAN32/MFSD2B/CD9/MMRN1/MYL9/GP6/DMTN/HPSE/STK39/ACTG1/USF2/P2RY12/FERMT3/VWF/F2R/ANO6/INPP5K/SERPING1/TLN1/F8/DGKG/PROS1/PLEK/TBXA2R/GNAQ/DGKD/SELP/HIF1A/ITGA2/PRDX2/HBB/PLA2G4A/SYK/CLIC1/PRKCA/PAPSS2/GP1BA/MPL/P2RX1/ALOX12/THBS1/GP9/GNAI2/VCL/CD36/SH2B3/ABAT/GNA12/ACTB/MYH9/MPIG6B/AP3B1/DGKZ/FLNA/UBASH3B/NFE2L2	57
GO:0030100	regulation of endocytosis	40/1061	214/18614	2.36866e-11	1.40751e-08	1.18627e-08	NR1H2/CBL/CD63/SNCA/AP2M1/CD151/CD2AP/PACSIN2/ANGPT1/ACTG1/LDLRAP1/VPS28/ARRB1/ARF1/ANO6/BMP2K/CLU/DGKD/RAB4A/ITGA2/MKLN1/SMPD1/SYK/NUMB/FLOT1/TBC1D5/AP2S1/VAMP4/RAB5B/APPL2/SCYL2/CALM3/ROCK1/CD36/MCTP1/ATXN2/EGF/ACTB/MTMR2/DNM2	40
GO:0031623	receptor internalization	29/1061	125/18614	6.25117e-11	3.34312e-08	2.81763e-08	CD63/CD9/GRK3/SNCA/AP2M1/SNX1/ANGPT1/LDLRAP1/DNM1/ARRB1/ARF1/AP2A1/RALB/DNM3/MKLN1/GRB2/ITGB1/SYK/NUMB/FLOT1/TBC1D5/AP2S1/SCYL2/CD36/ATXN2/GRK4/EGF/MTMR2/DNM2	29
GO:0043254	regulation of protein-containing complex assembly	58/1061	409/18614	1.21306e-10	5.89768e-08	4.97064e-08	MAPRE1/NR1H2/GSN/ABCA3/CAPZB/SNCA/MAVS/VPS41/CLIP1/NCK2/SNX9/DMTN/BIRC2/NCKAP1/P2RY12/MSN/FER/PTPN11/CTNNBIP1/RALB/VCP/RHOC/ARPC5/RAF1/PSRC1/COTL1/TMOD1/HDAC6/NAPA/CLU/CYFIP1/PLEK/FLII/TWF2/SELP/GRB2/SIRT2/SAR1A/VPS8/GSK3B/SYK/MKKS/EIF4G1/RB1/TMOD3/STX1A/RHOA/SPTB/RDX/ARHGAP18/CD36/SLF1/ARL2/TGFB1/SSH1/VDAC2/NEK7/SENP6	58
GO:0010506	regulation of autophagy	52/1061	348/18614	1.66835e-10	7.43528e-08	6.26655e-08	HTT/TPCN1/TAB2/FBXO7/RAB3GAP2/CAPNS1/SNCA/USP33/WDR41/ATP6V0A1/NPRL3/IKBKG/FKBP8/DCAF12/CCNY/GAPDH/WDR45/CTSA/RALB/STK11/GOLGA2/GPR137/MAPK3/CAPN1/HDAC6/STAT3/VPS26B/ATP6V1G1/HIF1A/DAP/SIRT2/TRIM38/GSK3B/GPR137B/EIF4G2/ATP13A2/PSAP/WIPI1/EIF4G1/AKT1/ATP6V1B2/ATP6V1E1/CDK16/ROCK1/LARP1/ATP6V0E1/RHEB/RMC1/SREBF2/ATP6V1A/HERC1/SNX5	52
GO:0010543	regulation of platelet activation	18/1061	52/18614	2.35425e-10	9.68502e-08	8.16267e-08	MFSD2B/CD9/MMRN1/GP6/DMTN/PLEK/GNAQ/SELP/PLA2G4A/SYK/PRKCA/GP1BA/ALOX12/GP9/SH2B3/ABAT/FLNA/UBASH3B	18
GO:1902903	regulation of supramolecular fiber organization	54/1061	376/18614	3.33086e-10	1.27239e-07	1.07239e-07	MAPRE1/WASF1/CD47/GSN/CAPZB/SNCA/SLC9A1/CLIP1/NCK2/SNX9/DMTN/ACTG1/NCKAP1/DSTN/TPM1/ROCK2/FER/TAOK1/ARF1/WDR1/RHOC/ARPC5/KATNB1/PSRC1/COTL1/INPP5K/MAP1A/TMOD1/HDAC6/WASF2/CLU/CYFIP1/PLEK/APP/FLII/TWF2/CORO1B/GRB2/TNXB/GPX1/MKKS/WASHC3/RB1/TMOD3/RHOA/SPTB/RDX/ARHGAP18/ROCK1/ARL2/WASF3/SSH1/FLNA/WASH6P	54
GO:0016236	macroautophagy	48/1061	322/18614	9.18474e-10	3.27467e-07	2.75993e-07	HTT/VTI1B/PACS2/RAB3GAP2/UBXN6/CAPNS1/WDR45B/UBXN2A/VPS41/ATP6V0A1/ATP2A2/IKBKG/VPS28/SNAP29/CHMP6/GAPDH/WDR45/CDC37/RALB/VCP/MAPK3/CAPN1/HDAC6/VTA1/VPS26B/CHMP5/ATP6V1G1/HIF1A/NBR1/ATP13A2/WIPI1/TBC1D5/AKT1/ATP6V1B2/ATP6V1E1/ATG9A/LRBA/ATG7/LARP1/TGFB1/ATP6V0E1/RHEB/LAMP2/STK3/SNAPIN/ATP6V1A/GABARAPL2/SNX5	48
GO:0042176	regulation of protein catabolic process	51/1061	361/18614	1.84929e-09	5.99346e-07	5.05137e-07	BCAP31/IRAK3/ZDHHC2/PSME3IP1/TMEM9/SNCA/RNF14/RCHY1/UBXN2A/VGLL4/SNX1/SNX9/MARCHF2/VPS28/CHMP6/NRDC/MSN/PSMF1/DEDD/CTSA/VCP/ZFAND2A/ODC1/MAP1A/CLU/CST3/DDA1/LAPTM4B/RILP/SIRT2/NDFIP1/GSK3B/ARAF/ATP13A2/GPX1/OAZ1/CDK2/AKT1/CUL4B/RDX/ATG7/ROCK1/PSMC5/GNA12/RNF40/SNX3/UBB/FLNA/GABARAPL2/PSMD2/NFE2L2	51
GO:0043161	proteasome-mediated ubiquitin-dependent protein catabolic process	58/1061	439/18614	1.90518e-09	5.99346e-07	5.05137e-07	BCAP31/GID8/AMN1/CDC34/DCAF11/ANKRD9/FBXW11/KLHDC3/SHARPIN/RNF14/CDC16/RCHY1/UBXN2A/TRIP12/CD2AP/UBE2J1/BIRC2/RNF216/FBXW5/DCAF12/HERC2/ARRB1/UBE2C/PSMF1/UBE2G2/VCP/ZFAND2A/AKIRIN2/OS9/ZFAND2B/CCDC47/MAP1A/CLU/ANAPC5/PCNP/DDA1/SIRT2/TRIM38/GSK3B/ARAF/UBE4B/CDK2/DERL2/AKT1/WWP1/ASCC2/AMFR/MAN1A1/PSMC5/GNA12/RBCK1/PSMD6/FBXL4/SEL1L/FBXO9/PPP2CB/PSMD2/NFE2L2	58
GO:0007015	actin filament organization	57/1061	442/18614	6.42817e-09	1.90988e-06	1.60967e-06	WASF1/INF2/SAMD14/CD47/GSN/MYO5A/CAPZB/GAS2L1/SLC9A1/TPM4/CD2AP/NCK2/SNX9/DMTN/TPM3/ACTG1/NCKAP1/DSTN/TPM1/ROCK2/FER/ARRB1/ARF1/WDR1/RHOC/ARPC5/CFL1/COTL1/INPP5K/WIPF1/TMOD1/WASF2/MYO1C/CYFIP1/PLEK/TPM2/FLII/ZYX/TWF2/ITGB5/CORO1B/GRB2/PLS3/MKKS/WASHC3/TMOD3/RHOA/SPTB/DIAPH1/RDX/ARHGAP18/ROCK1/WASF3/SSH1/FLNA/WASH6P/DBN1	57
GO:0022411	cellular component disassembly	60/1061	488/18614	1.54733e-08	4.28243e-06	3.60929e-06	PLAAT1/HTT/DUSP3/IRAK3/GSN/FBXO7/CAPZB/SHARPIN/WDR45B/GSPT1/DMTN/ATP2A2/IGF1R/SNAP29/FKBP8/CHMP6/DSTN/WDR45/FER/TAOK1/CDC37/WDR1/VCP/GOLGA2/KATNB1/CFL1/MAP1A/TMOD1/HDAC6/VTA1/NAPA/CHMP5/PLEK/FLII/CST3/TWF2/MCTS1/PRKCB/HIF1A/ADAM10/ITGB1/GSK3B/PRKCA/ATP13A2/FLOT1/WIPI1/TMOD3/ASCC2/SPTB/ATG9A/RDX/LRBA/ATG7/TGFB1/OGFOD1/FBXL4/LAMP2/SNAPIN/SREBF2/GABARAPL2	60
GO:0045807	positive regulation of endocytosis	22/1061	96/18614	1.60151e-08	4.28243e-06	3.60929e-06	CBL/CD63/SNCA/AP2M1/CD151/ANGPT1/LDLRAP1/VPS28/ARRB1/ANO6/CLU/DGKD/ITGA2/SMPD1/SYK/FLOT1/TBC1D5/APPL2/SCYL2/CD36/EGF/DNM2	22
GO:0006898	receptor-mediated endocytosis	39/1061	256/18614	1.88391e-08	4.7977e-06	4.04356e-06	WASF1/CBL/CD63/CD9/GRK3/SNCA/PDLIM7/AP2M1/CD2AP/SNX1/SNX9/ANGPT1/LDLRAP1/DNM1/ARRB1/ARF1/AP2A1/RALB/BMP2K/CLU/DNM3/CAP1/DGKD/MKLN1/GRB2/ITGB1/SYK/NUMB/FLOT1/TBC1D5/EPS15/AP2S1/SCYL2/CD36/ATXN2/GRK4/EGF/MTMR2/DNM2	39
GO:0032386	regulation of intracellular transport	46/1061	332/18614	2.12337e-08	5.16172e-06	4.35037e-06	SETD2/BCAP31/WWC1/ZDHHC2/GDI1/MAVS/UBE2J1/DMTN/ANGPT1/ANP32B/LDLRAP1/ABLIM3/MSN/BAP1/UBE2G2/PTPN11/STK11/MLC1/OS9/MAPK3/INPP5K/YWHAE/MYO1C/SCP2/UBAC2/STOM/SH3TC2/SAR1A/GSK3B/RAB11B/ATP13A2/STX18/OAZ1/DERL2/ANK3/SUPT6H/RDX/CD36/KIF20B/TGFB1/MFF/SNX3/SNAPIN/MTMR2/SREBF2/FLNA	46
GO:0110053	regulation of actin filament organization	40/1061	268/18614	2.23023e-08	5.18577e-06	4.37064e-06	WASF1/CD47/GSN/CAPZB/SLC9A1/NCK2/SNX9/DMTN/ACTG1/NCKAP1/DSTN/TPM1/ROCK2/FER/ARF1/WDR1/RHOC/ARPC5/COTL1/INPP5K/TMOD1/WASF2/CYFIP1/PLEK/FLII/TWF2/CORO1B/GRB2/MKKS/WASHC3/TMOD3/RHOA/SPTB/RDX/ARHGAP18/ROCK1/WASF3/SSH1/FLNA/WASH6P	40
GO:0034110	regulation of homotypic cell-cell adhesion	13/1061	37/18614	6.15824e-08	1.37226e-05	1.15656e-05	MFSD2B/CD9/MMRN1/GP6/DMTN/SYK/PRKCA/ALOX12/ANK3/RDX/SH2B3/ABAT/UBASH3B	13
GO:0051656	establishment of organelle localization	54/1061	445/18614	1.25994e-07	2.69527e-05	2.27161e-05	MAPRE1/HTT/WASF1/KIFAP3/CBL/KAT2B/MYO5A/STARD3NL/FBXW11/SNCA/EXOC5/SNAP23/ARMCX3/MAP4K2/TRAK2/IKBKG/DNM1/SNAP29/CHMP6/KXD1/SLC18A2/FER/RAB6A/STK11/ARHGAP21/PSRC1/CFL1/HDAC6/STXBP2/MYO1C/CHMP5/HIF1A/ITGB1/SAR1A/RAB11B/SYK/ATP13A2/TRAPPC1/MKKS/WIPI1/TBC1D23/AP3M1/RMDN1/UNC13D/CLMN/UBB/MYH9/AP3B1/SNAPIN/AP3S1/DYNC1I1/PPP6C/DNM2/STARD3	54
GO:0032970	regulation of actin filament-based process	49/1061	387/18614	1.32296e-07	2.72122e-05	2.29348e-05	WASF1/CD47/GSN/RYR2/CAPZB/CNN2/SLC9A1/CD2AP/NCK2/SNX9/DMTN/ATP2A2/ACTG1/NCKAP1/PKP2/DSTN/TPM1/ROCK2/FER/TAOK1/ARF1/WDR1/RHOC/ARPC5/COTL1/INPP5K/TMOD1/WASF2/CYFIP1/ARHGDIB/PLEK/FLII/TWF2/CORO1B/GRB2/MKKS/WASHC3/TMOD3/RHOA/SPTB/RDX/ARHGAP18/ROCK1/WASF3/MYH9/SSH1/FLNA/WASH6P/PDE4D	49
GO:0008154	actin polymerization or depolymerization	31/1061	192/18614	1.41836e-07	2.80939e-05	2.3678e-05	WASF1/INF2/GSN/CAPZB/NCK2/SNX9/DMTN/NCKAP1/DSTN/FER/WDR1/ARPC5/CFL1/COTL1/WIPF1/TMOD1/CYFIP1/PLEK/FLII/TWF2/GRB2/MKKS/WASHC3/TMOD3/RHOA/SPTB/DIAPH1/RDX/ARHGAP18/WASF3/SSH1	31
GO:0097581	lamellipodium organization	20/1061	91/18614	1.49614e-07	2.85762e-05	2.40844e-05	WASF1/CAPZB/PLEKHO1/SNX1/NCK2/DMTN/NCKAP1/P2RY12/ABLIM3/PARVB/FER/WASF2/CYFIP1/TWF2/CORO1B/ITGB1/AKIRIN1/VCL/WASF3/DNM2	20
GO:0016050	vesicle organization	47/1061	368/18614	1.83997e-07	3.39315e-05	2.8598e-05	SORT1/VTI1B/TMEM9/STX4/RAB32/SNCA/SNAP23/AP2M1/VPS41/SNX19/ATP6V0A1/CD2AP/VPS28/DNM1/SNAP29/CHMP6/LAMTOR1/ATP6AP2/F2R/VTA1/VAPB/CHMP5/ATP6V1G1/LAPTM4B/CLCN3/RILP/RFX2/SAR1A/VPS8/ATP13A2/TRAPPC1/EPS15/STX1A/VAMP4/ATP6V1B2/AP3M1/ATP6V1E1/RAB5B/ATP6AP1/AP1B1/SNX3/AP3B1/SNAPIN/AGFG1/AP3S1/ATP6V1A/PPP6C	47
GO:0030193	regulation of blood coagulation	17/1061	70/18614	2.78162e-07	4.95869e-05	4.17926e-05	CD9/DMTN/HPSE/F2R/ANO6/SERPING1/PROS1/TBXA2R/PRDX2/GP1BA/ALOX12/THBS1/CD36/SH2B3/ABAT/UBASH3B/NFE2L2	17
GO:0007229	integrin-mediated signaling pathway	22/1061	112/18614	2.96497e-07	5.11505e-05	4.31103e-05	TSPAN32/CD63/CD47/PTPRA/CTNNA1/DMTN/ITGA2B/FERMT3/PTPN11/LOXL3/TLN1/PLEK/ZYX/ITGA2/ITGB5/ADAM10/ITGB1/FUT8/SYK/MYH9/MPIG6B/FLNA	22
GO:0016311	dephosphorylation	44/1061	342/18614	3.67726e-07	6.14561e-05	5.17961e-05	HTT/DUSP3/PTP4A3/FBXW11/PTPRA/ACP2/PTPRS/ACP1/ROCK2/INPP5A/PTPA/PTPN12/PTPN11/ANKLE2/SMG7/STK11/DUSP22/ARPP19/INPP5K/IMPA2/YWHAE/PLEK/ITGA2/PPM1N/PTPRF/SMPD1/GSK3B/PPP6R1/CDC14B/PTP4A2/PPP6R3/INPP5B/PPP2R3C/CALM3/ROCK1/GNAI2/GNA12/TGFB1/SSH1/SEMA4D/MTMR2/PPP2CB/PPP6C/UBASH3B	44
GO:0090330	regulation of platelet aggregation	11/1061	30/18614	3.92447e-07	6.36001e-05	5.36031e-05	MFSD2B/CD9/MMRN1/GP6/DMTN/SYK/PRKCA/ALOX12/SH2B3/ABAT/UBASH3B	11
GO:0051258	protein polymerization	38/1061	276/18614	4.17894e-07	6.38404e-05	5.38056e-05	MAPRE1/WASF1/INF2/GSN/TUBG1/CAPZB/SNCA/CLIP1/NCK2/SNX9/DMTN/NCKAP1/FER/UBE2C/GOLGA2/ARPC5/PSRC1/COTL1/TMOD1/CYFIP1/FLII/TWF2/GRB2/MKKS/WASHC3/TMOD3/RHOA/SPTB/GPX4/DIAPH1/RDX/ARHGAP18/ARL2/ZNF207/WASF3/TUBG2/SSH1/VDAC2	38
GO:1902905	positive regulation of supramolecular fiber organization	28/1061	171/18614	4.19791e-07	6.38404e-05	5.38056e-05	MAPRE1/WASF1/CD47/GSN/CLIP1/NCK2/SNX9/NCKAP1/DSTN/TPM1/ROCK2/FER/WDR1/RHOC/KATNB1/PSRC1/WASF2/CLU/CYFIP1/PLEK/APP/GRB2/TNXB/GPX1/RB1/RHOA/ARL2/WASF3	28
GO:1900046	regulation of hemostasis	17/1061	72/18614	4.29741e-07	6.38404e-05	5.38056e-05	CD9/DMTN/HPSE/F2R/ANO6/SERPING1/PROS1/TBXA2R/PRDX2/GP1BA/ALOX12/THBS1/CD36/SH2B3/ABAT/UBASH3B/NFE2L2	17
GO:0016197	endosomal transport	35/1061	248/18614	6.58054e-07	9.51154e-05	8.01646e-05	SORT1/VTI1B/ZDHHC2/REPS2/UBXN6/TBC1D17/SNX1/SNX9/VPS28/CHMP6/LAMTOR1/VCP/RAB6A/VTA1/CMTM6/VPS26B/CHMP5/AP5M1/LAPTM4B/RILP/RAB11B/VPS26C/WASHC3/TBC1D5/EPS15/RAB10/VAMP4/TBC1D23/ATP6AP1/RAB6B/SNX3/BLTP3B/AP5Z1/WASH6P/SNX5	35
GO:0050818	regulation of coagulation	17/1061	75/18614	7.99795e-07	0.000111792	9.42201e-05	CD9/DMTN/HPSE/F2R/ANO6/SERPING1/PROS1/TBXA2R/PRDX2/GP1BA/ALOX12/THBS1/CD36/SH2B3/ABAT/UBASH3B/NFE2L2	17
GO:0051650	establishment of vesicle localization	30/1061	197/18614	8.15239e-07	0.000111792	9.42201e-05	HTT/KIFAP3/MYO5A/STARD3NL/FBXW11/SNCA/EXOC5/SNAP23/MAP4K2/TRAK2/IKBKG/DNM1/SNAP29/STK11/MYO1C/SAR1A/RAB11B/ATP13A2/TRAPPC1/MKKS/WIPI1/TBC1D23/AP3M1/AP3B1/SNAPIN/AP3S1/DYNC1I1/PPP6C/DNM2/STARD3	30
GO:0099504	synaptic vesicle cycle	30/1061	198/18614	9.09497e-07	0.000120845	0.00010185	SNCA/SNAP23/AP2M1/ATP6V0A1/ATP2A2/ACTG1/DNM1/SNAP29/SLC18A2/ATP6AP2/NAPA/DNM3/CYFIP1/ATP6V1G1/PRKCB/CLCN3/STX1A/AP2S1/P2RX1/VAMP4/ATP6V1B2/ATP6V1E1/ATP6AP1/CALM3/ROCK1/ACTB/SNAPIN/AP3S1/ATP6V1A/DNM2	30
GO:0097401	synaptic vesicle lumen acidification	8/1061	16/18614	9.26446e-07	0.000120845	0.00010185	ATP6V0A1/ATP6AP2/ATP6V1G1/CLCN3/ATP6V1B2/ATP6V1E1/ATP6AP1/ATP6V1A	8
GO:0099003	vesicle-mediated transport in synapse	32/1061	220/18614	1.00446e-06	0.000127901	0.000107797	SNCA/SNAP23/AP2M1/ATP6V0A1/ATP2A2/ACTG1/DNM1/SNAP29/SLC18A2/AP2A1/ATP6AP2/NAPA/DNM3/CYFIP1/ATP6V1G1/PRKCB/CLCN3/NUMB/STX1A/AP2S1/P2RX1/VAMP4/ATP6V1B2/ATP6V1E1/ATP6AP1/CALM3/ROCK1/ACTB/SNAPIN/AP3S1/ATP6V1A/DNM2	32
GO:0032956	regulation of actin cytoskeleton organization	43/1061	346/18614	1.2748e-06	0.00015855	0.000133628	WASF1/CD47/GSN/CAPZB/SLC9A1/CD2AP/NCK2/SNX9/DMTN/ACTG1/NCKAP1/DSTN/TPM1/ROCK2/FER/TAOK1/ARF1/WDR1/RHOC/ARPC5/COTL1/INPP5K/TMOD1/WASF2/CYFIP1/ARHGDIB/PLEK/FLII/TWF2/CORO1B/GRB2/MKKS/WASHC3/TMOD3/RHOA/SPTB/RDX/ARHGAP18/ROCK1/WASF3/SSH1/FLNA/WASH6P	43
GO:0090066	regulation of anatomical structure size	55/1061	492/18614	1.3662e-06	0.000166056	0.000139954	DOCK5/GSN/TBXAS1/CAPZB/GDI1/AP2M1/MACF1/NCK2/SNX9/GCLM/DMTN/NCKAP1/PTPRS/KXD1/DSTN/ROCK2/MSN/FER/CLN8/RTN4/TMEM123/WDR1/F2R/ANO6/ARPC5/COTL1/TMOD1/HDAC6/CYFIP1/PLEK/HTR2A/TBXA2R/FLII/TWF2/HBB/CLCN3/RILP/GRB2/GSK3B/ATP13A2/GPX1/MKKS/TMOD3/P2RX1/RHOA/SPTB/RNF6/RAP1GDS1/RDX/ARHGAP18/ROCK1/SSH1/SNAPIN/SEMA4D/DNM2	55
GO:0030041	actin filament polymerization	26/1061	162/18614	1.59128e-06	0.000189115	0.000159389	WASF1/INF2/GSN/CAPZB/NCK2/SNX9/DMTN/NCKAP1/FER/ARPC5/COTL1/TMOD1/CYFIP1/FLII/TWF2/GRB2/MKKS/WASHC3/TMOD3/RHOA/SPTB/DIAPH1/RDX/ARHGAP18/WASF3/SSH1	26
GO:0048259	regulation of receptor-mediated endocytosis	21/1061	115/18614	1.91551e-06	0.000222699	0.000187694	CBL/CD63/AP2M1/CD2AP/ANGPT1/LDLRAP1/ARRB1/ARF1/BMP2K/CLU/DGKD/MKLN1/SYK/NUMB/FLOT1/TBC1D5/SCYL2/ATXN2/EGF/MTMR2/DNM2	21
GO:0006470	protein dephosphorylation	34/1061	249/18614	2.02734e-06	0.00022612	0.000190577	HTT/DUSP3/PTP4A3/FBXW11/PTPRA/PTPRS/ACP1/ROCK2/PTPA/PTPN12/PTPN11/ANKLE2/STK11/DUSP22/ARPP19/YWHAE/PPM1N/PTPRF/SMPD1/GSK3B/PPP6R1/CDC14B/PTP4A2/PPP6R3/CALM3/ROCK1/GNAI2/GNA12/TGFB1/SSH1/MTMR2/PPP2CB/PPP6C/UBASH3B	34
GO:0048193	Golgi vesicle transport	38/1061	294/18614	2.0295e-06	0.00022612	0.000190577	HTT/BCAP31/SORT1/VTI1B/MYO5A/BLZF1/EXOC5/SNAP23/MACF1/LYPLA1/ARF4/SNX1/P4HB/AP2A1/VCP/RAB6A/GOLGA2/ARF5/NAPA/VAPB/ATP9B/SAR1A/TRAPPC1/STX18/WIPI1/COG5/EPS15/RAB10/ANK3/YIF1B/RAB6B/SNX3/AP3S1/BLTP3B/GABARAPL2/PPP6C/DNM2/COPZ1	38
GO:0070050	neuron cellular homeostasis	15/1061	64/18614	2.25408e-06	0.000246017	0.000207347	ATP6V0A1/ATP2A2/TAOK1/BAP1/ATP6AP2/MAP1A/APP/ATP6V1G1/CLCN3/P2RX1/ATP6V1B2/ATP6V1E1/ATP6AP1/SNAPIN/ATP6V1A	15
GO:0032535	regulation of cellular component size	43/1061	354/18614	2.33666e-06	0.000249929	0.000210644	GSN/CAPZB/GDI1/AP2M1/MACF1/NCK2/SNX9/DMTN/NCKAP1/PTPRS/KXD1/DSTN/MSN/FER/CLN8/RTN4/TMEM123/WDR1/ANO6/ARPC5/COTL1/TMOD1/HDAC6/CYFIP1/PLEK/FLII/TWF2/CLCN3/RILP/GRB2/GSK3B/ATP13A2/MKKS/TMOD3/RHOA/SPTB/RNF6/RDX/ARHGAP18/SSH1/SNAPIN/SEMA4D/DNM2	43
GO:0030032	lamellipodium assembly	16/1061	73/18614	2.69663e-06	0.000282349	0.000237967	CAPZB/NCK2/DMTN/NCKAP1/P2RY12/ABLIM3/PARVB/FER/WASF2/CYFIP1/TWF2/ITGB1/AKIRIN1/VCL/WASF3/DNM2	16
GO:0035303	regulation of dephosphorylation	22/1061	127/18614	2.74535e-06	0.000282349	0.000237967	HTT/ROCK2/PTPA/ANKLE2/SMG7/ARPP19/INPP5K/YWHAE/PLEK/ITGA2/SMPD1/GSK3B/PPP6R1/PPP6R3/PPP2R3C/CALM3/ROCK1/GNAI2/GNA12/TGFB1/SEMA4D/MTMR2	22
GO:0007265	Ras protein signal transduction	41/1061	333/18614	2.83987e-06	0.000286559	0.000241516	STAMBP/WASF1/DOCK5/CBL/SSX2IP/GDI1/DOK3/RABL3/NCKAP1/ROCK2/ARRB1/GNB1/RALB/F2R/RAF1/DBNL/CFL1/WASF2/CYFIP1/ARHGDIB/MAPKAP1/NKIRAS2/RAB4A/SH2B2/GRB2/ITGB1/FLOT1/CDK2/DOK2/RB1/RHOA/BRAP/RDX/ROCK1/RASGRF2/GNA12/BCR/RASA3/ARHGEF12/PPP2CB/DNM2	41
GO:0072384	organelle transport along microtubule	18/1061	91/18614	3.14656e-06	0.000311626	0.000262642	HTT/WASF1/KIFAP3/FBXW11/ARMCX3/TRAK2/KXD1/RAB6A/STK11/ARHGAP21/HDAC6/HIF1A/AP3M1/UBB/AP3B1/SNAPIN/AP3S1/DYNC1I1	18
GO:0051051	negative regulation of transport	53/1061	483/18614	3.68455e-06	0.000348735	0.000293919	NR1H2/MAOB/GRB10/CD47/GDI1/SNCA/TMBIM6/CNN2/LYPLA1/WDR41/UBE2J1/DMTN/STK39/PACSIN2/ANGPT1/GSTO1/UBE2G2/PTPN11/F2R/OS9/PNKD/INPP5K/PFKL/YWHAE/CYFIP1/HTR2A/UBAC2/PRKCB/DYSF/NDFIP1/SPX/SESTD1/OAZ1/DERL2/AKT1/PPIF/GNAZ/ANK3/THBS1/APPL2/CALM3/GNAI2/CD36/ABAT/GNB5/MCTP1/ATXN2/BCR/EGF/SNX3/MTMR2/SREBF2/PXK	53
GO:0036344	platelet morphogenesis	9/1061	24/18614	3.68463e-06	0.000348735	0.000293919	CASP9/CLEC1B/NBEAL2/BAP1/WDR1/PTPN11/MPL/MYH9/MPIG6B	9
GO:0008064	regulation of actin polymerization or depolymerization	24/1061	149/18614	3.71689e-06	0.000348735	0.000293919	GSN/CAPZB/NCK2/SNX9/DMTN/NCKAP1/DSTN/FER/WDR1/ARPC5/COTL1/TMOD1/CYFIP1/PLEK/FLII/TWF2/GRB2/MKKS/TMOD3/RHOA/SPTB/RDX/ARHGAP18/SSH1	24
GO:1903034	regulation of response to wounding	26/1061	170/18614	3.99768e-06	0.000368614	0.000310673	CD9/MMRN1/DMTN/HPSE/IGF1R/ACTG1/PTPRS/F2R/ANO6/SERPING1/PROS1/TBXA2R/PRDX2/PTPRF/ITGB1/GP1BA/ALOX12/THBS1/CD36/SH2B3/ABAT/CD109/CERS2/FLNA/UBASH3B/NFE2L2	26
GO:0061515	myeloid cell development	17/1061	84/18614	4.23806e-06	0.000380849	0.000320985	ABCB10/ALAS2/DMTN/G6PD/LTF/TSPAN2/BAP1/PTPN11/WASF2/APP/GP1BA/TMOD3/ATP6AP1/GP9/SH2B3/MPIG6B/FLNA	17
GO:0033157	regulation of intracellular protein transport	31/1061	224/18614	4.2728e-06	0.000380849	0.000320985	BCAP31/ZDHHC2/GDI1/MAVS/UBE2J1/DMTN/ANGPT1/ANP32B/ABLIM3/BAP1/UBE2G2/PTPN11/OS9/INPP5K/YWHAE/MYO1C/UBAC2/STOM/SH3TC2/SAR1A/GSK3B/ATP13A2/OAZ1/DERL2/ANK3/CD36/KIF20B/TGFB1/MFF/SREBF2/FLNA	31
GO:0051648	vesicle localization	30/1061	215/18614	5.13434e-06	0.000450138	0.000379383	HTT/KIFAP3/MYO5A/STARD3NL/FBXW11/SNCA/EXOC5/SNAP23/MAP4K2/TRAK2/IKBKG/DNM1/SNAP29/STK11/MYO1C/SAR1A/RAB11B/ATP13A2/TRAPPC1/MKKS/WIPI1/TBC1D23/AP3M1/AP3B1/SNAPIN/AP3S1/DYNC1I1/PPP6C/DNM2/STARD3	30
GO:0030832	regulation of actin filament length	24/1061	152/18614	5.30459e-06	0.000457564	0.000385641	GSN/CAPZB/NCK2/SNX9/DMTN/NCKAP1/DSTN/FER/WDR1/ARPC5/COTL1/TMOD1/CYFIP1/PLEK/FLII/TWF2/GRB2/MKKS/TMOD3/RHOA/SPTB/RDX/ARHGAP18/SSH1	24
GO:0010572	positive regulation of platelet activation	6/1061	10/18614	5.82462e-06	0.000494446	0.000416726	PLEK/SELP/PLA2G4A/GP1BA/GP9/FLNA	6
GO:0048260	positive regulation of receptor-mediated endocytosis	13/1061	53/18614	6.20179e-06	0.000518237	0.000436777	CBL/CD63/AP2M1/ANGPT1/LDLRAP1/ARRB1/CLU/DGKD/SYK/TBC1D5/SCYL2/EGF/DNM2	13
GO:0006605	protein targeting	40/1061	333/18614	6.84696e-06	0.000563347	0.000474797	BCAP31/SORT1/FBXO7/ZDHHC2/GDI1/RAB3IP/VPS41/TRAK2/DMTN/ABLIM3/BAP1/CDC37/ZFAND2A/OS9/KATNB1/ZFAND2B/INPP5K/YWHAE/CLU/MYO1C/STOM/ZDHHC4/VPS8/NCOA4/TIMM17B/ANK3/UBL4A/AP3M1/YIF1B/SRPRA/MAN1A1/SSR1/TRAM1/MFF/LAMP2/HACL1/AP4S1/AP3B1/SREBF2/PXK	40
GO:1903421	regulation of synaptic vesicle recycling	9/1061	26/18614	7.93874e-06	0.000643279	0.000542164	SNCA/AP2M1/ACTG1/DNM3/CYFIP1/VAMP4/CALM3/ROCK1/ACTB	9
GO:0002090	regulation of receptor internalization	14/1061	63/18614	9.49695e-06	0.000758055	0.000638899	CD63/AP2M1/ANGPT1/ARRB1/ARF1/MKLN1/SYK/NUMB/FLOT1/TBC1D5/SCYL2/ATXN2/EGF/MTMR2	14
GO:0016188	synaptic vesicle maturation	9/1061	27/18614	1.13076e-05	0.000889307	0.000749521	ATP6V0A1/ATP6AP2/ATP6V1G1/CLCN3/ATP6V1B2/ATP6V1E1/ATP6AP1/SNAPIN/ATP6V1A	9
GO:0016241	regulation of macroautophagy	24/1061	159/18614	1.16656e-05	0.000899937	0.000758479	HTT/RAB3GAP2/CAPNS1/ATP6V0A1/IKBKG/GAPDH/WDR45/RALB/MAPK3/CAPN1/HDAC6/VPS26B/ATP6V1G1/HIF1A/ATP13A2/WIPI1/AKT1/ATP6V1B2/ATP6V1E1/LARP1/ATP6V0E1/RHEB/ATP6V1A/SNX5	24
GO:0032271	regulation of protein polymerization	27/1061	191/18614	1.17793e-05	0.000899937	0.000758479	MAPRE1/GSN/CAPZB/SNCA/CLIP1/NCK2/SNX9/DMTN/NCKAP1/FER/ARPC5/PSRC1/COTL1/TMOD1/CYFIP1/FLII/TWF2/GRB2/MKKS/TMOD3/RHOA/SPTB/RDX/ARHGAP18/ARL2/SSH1/VDAC2	27
GO:0001676	long-chain fatty acid metabolic process	19/1061	110/18614	1.3477e-05	0.00101514	0.000855577	TBXAS1/SLC27A4/QKI/MGLL/ACSL4/FADS2/GSTM4/ACSBG1/ACSL1/SCP2/GSTM1/PLA2G4A/GPX1/ALOX12/GPX4/ACOT8/PTGS1/HACL1/ACOT7	19
GO:0030833	regulation of actin filament polymerization	21/1061	130/18614	1.41238e-05	0.00104909	0.000884184	GSN/CAPZB/NCK2/SNX9/DMTN/NCKAP1/FER/ARPC5/COTL1/TMOD1/CYFIP1/FLII/TWF2/GRB2/MKKS/TMOD3/RHOA/SPTB/RDX/ARHGAP18/SSH1	21
GO:0072659	protein localization to plasma membrane	35/1061	285/18614	1.57268e-05	0.00112835	0.000950989	BSG/HYCC2/VTI1B/PACS2/MYO5A/ZDHHC2/STX4/BLZF1/EXOC5/AP2M1/MACF1/LYPLA1/LDLRAP1/PKP2/ROCK2/TTC7B/TSPAN14/INPP5K/PACS1/PGRMC1/TSPAN33/ITGB1/NUMB/FLOT1/TMBIM1/RAB10/AKT1/ANK3/ATP1B1/ATP6AP1/RDX/ROCK1/TGFB1/ACTB/FLNA	35
GO:0030194	positive regulation of blood coagulation	9/1061	28/18614	1.58239e-05	0.00112835	0.000950989	DMTN/HPSE/F2R/ANO6/TBXA2R/PRDX2/THBS1/CD36/NFE2L2	9
GO:1900048	positive regulation of hemostasis	9/1061	28/18614	1.58239e-05	0.00112835	0.000950989	DMTN/HPSE/F2R/ANO6/TBXA2R/PRDX2/THBS1/CD36/NFE2L2	9
GO:0007264	small GTPase mediated signal transduction	51/1061	483/18614	1.62949e-05	0.00114665	0.000966409	STAMBP/WASF1/DOCK5/CBL/SSX2IP/GDI1/NUCB1/DOK3/RABL3/CD2AP/NCKAP1/ROCK2/ARRB1/GNB1/RALB/RHOC/F2R/ARHGAP21/RAF1/DBNL/CFL1/WASF2/CYFIP1/ARHGDIB/MAPKAP1/NKIRAS2/RAB4A/ARHGAP45/SH2B2/GRB2/CCDC88C/ITGB1/FLOT1/CDK2/DOK2/RB1/RHOA/BRAP/RDX/ARHGAP18/ROCK1/RASGRF2/GNA12/BCR/RHEB/ARHGAP10/RASA3/ARHGEF12/GMIP/PPP2CB/DNM2	51
GO:0030220	platelet formation	8/1061	22/18614	1.69244e-05	0.00117547	0.000990705	CASP9/CLEC1B/NBEAL2/WDR1/PTPN11/MPL/MYH9/MPIG6B	8
GO:0031334	positive regulation of protein-containing complex assembly	27/1061	195/18614	1.72691e-05	0.00118404	0.000997927	MAPRE1/NR1H2/ABCA3/SNCA/MAVS/CLIP1/NCK2/SNX9/NCKAP1/P2RY12/MSN/FER/VCP/RHOC/PSRC1/CLU/PLEK/GRB2/GSK3B/SYK/EIF4G1/RHOA/CD36/SLF1/ARL2/TGFB1/NEK7	27
GO:0032984	protein-containing complex disassembly	31/1061	240/18614	1.75579e-05	0.00118491	0.000998661	IRAK3/GSN/CAPZB/GSPT1/DMTN/ATP2A2/IGF1R/SNAP29/CHMP6/DSTN/TAOK1/WDR1/VCP/KATNB1/CFL1/MAP1A/TMOD1/HDAC6/VTA1/NAPA/CHMP5/PLEK/FLII/TWF2/GSK3B/TMOD3/SPTB/RDX/OGFOD1/LAMP2/SNAPIN	31
GO:0030042	actin filament depolymerization	13/1061	58/18614	1.78362e-05	0.00118491	0.000998661	GSN/CAPZB/DMTN/DSTN/WDR1/CFL1/TMOD1/PLEK/FLII/TWF2/TMOD3/SPTB/RDX	13
GO:0031589	cell-substrate adhesion	41/1061	359/18614	1.79465e-05	0.00118491	0.000998661	DOCK5/DUSP3/CD63/MACF1/SLC9A1/PTPRA/DMTN/HPSE/ANGPT1/ACTG1/P4HB/ITGA2B/PKP2/ROCK2/PARVB/FER/FERMT3/GFUS/VWF/DUSP22/TLN1/ZYX/ITGA2/ITGB5/MKLN1/ITGB1/NID2/GSK3B/TNXB/CD96/RHOA/THBS1/MINK1/ROCK1/VCL/CD36/UNC13D/ARL2/BCR/FLNA/DNM2	41
GO:0052548	regulation of endopeptidase activity	39/1061	336/18614	1.97313e-05	0.00128687	0.00108459	A2M/BCAP31/GSN/CASP9/CDKN2D/SNCA/SERPINB1/USP47/CYCS/BIRC2/ANP32B/LTF/GAPDH/NRDC/ROCK2/MAP3K5/VCP/F2R/AKIRIN2/RAF1/LGMN/SERPING1/STAT3/SERPINI1/CST3/UACA/PRR7/DAP/SYK/ATP13A2/GPX1/P2RX1/RHOA/ATP2A3/AKT1/SERPINB6/SENP1/THBS1/DNAJB6	39
GO:0043244	regulation of protein-containing complex disassembly	20/1061	123/18614	2.03371e-05	0.0013104	0.00110442	IRAK3/GSN/CAPZB/GSPT1/DMTN/IGF1R/DSTN/TAOK1/WDR1/KATNB1/MAP1A/TMOD1/HDAC6/PLEK/FLII/TWF2/TMOD3/SPTB/RDX/OGFOD1	20
GO:0032388	positive regulation of intracellular transport	27/1061	197/18614	2.0807e-05	0.00132471	0.00111648	BCAP31/ZDHHC2/MAVS/ANP32B/LDLRAP1/ABLIM3/MSN/BAP1/STK11/MLC1/YWHAE/MYO1C/SCP2/STOM/SAR1A/GSK3B/STX18/OAZ1/ANK3/RDX/KIF20B/TGFB1/MFF/SNAPIN/MTMR2/SREBF2/FLNA	27
GO:1901879	regulation of protein depolymerization	16/1061	86/18614	2.46059e-05	0.00154815	0.0013048	GSN/CAPZB/DMTN/DSTN/TAOK1/WDR1/KATNB1/MAP1A/TMOD1/HDAC6/PLEK/FLII/TWF2/TMOD3/SPTB/RDX	16
GO:0021762	substantia nigra development	11/1061	44/18614	2.63784e-05	0.00164037	0.00138252	MAOB/YWHAH/G6PD/YWHAE/MAPKAP1/CKB/SIRT2/CCDC14/RHOA/CALM3/ACTB	11
GO:0050820	positive regulation of coagulation	9/1061	30/18614	2.956e-05	0.00181709	0.00153147	DMTN/HPSE/F2R/ANO6/TBXA2R/PRDX2/THBS1/CD36/NFE2L2	9
GO:0007032	endosome organization	17/1061	97/18614	3.11432e-05	0.00189266	0.00159516	TMEM9/ATP6V0A1/VPS28/DNM1/CHMP6/LAMTOR1/ATP6AP2/VTA1/CHMP5/LAPTM4B/CLCN3/RILP/VAMP4/RAB5B/ATP6AP1/SNX3/ATP6V1A	17
GO:0061041	regulation of wound healing	21/1061	137/18614	3.1877e-05	0.00191549	0.0016144	CD9/MMRN1/DMTN/HPSE/ACTG1/F2R/ANO6/SERPING1/PROS1/TBXA2R/PRDX2/ITGB1/GP1BA/ALOX12/THBS1/CD36/SH2B3/ABAT/CD109/UBASH3B/NFE2L2	21
GO:0030834	regulation of actin filament depolymerization	12/1061	53/18614	3.35172e-05	0.00199167	0.0016786	GSN/CAPZB/DMTN/DSTN/WDR1/TMOD1/PLEK/FLII/TWF2/TMOD3/SPTB/RDX	12
GO:1902074	response to salt	42/1061	383/18614	3.74428e-05	0.00220048	0.0018546	ATF2/MEF2A/CPNE2/RYR2/GDI1/ENTPD6/TMBIM6/GCLM/IGFBP2/DMTN/STK39/HOMER2/IGF1R/G6PD/ACTG1/P2RY12/ROCK2/GNB1/ANKH/GNA15/LGMN/IMPA2/HTR2A/CHRNA2/GNAQ/PRKCB/ITGA2/SMPD1/ANXA11/CPNE5/P2RX1/PPIF/CLIC4/THBS1/CALM3/GNAI2/CD36/ABAT/SSH1/NEK7/DNM2/NFE2L2	42
GO:0019693	ribose phosphate metabolic process	49/1061	473/18614	3.89335e-05	0.00226322	0.00190747	GUK1/PDE2A/SNCA/PAPSS1/PGK1/PYGL/PFKP/DIP2A/ENO1/NDUFA5/ACSL4/ACSS2/G6PD/GAPDH/GUCY1B1/GMPR2/ACSBG1/VCP/ACSM3/NME4/PFKL/STAT3/TPST2/ACSL1/HTR2A/APP/RPIA/DMAC2L/HIF1A/ADCY3/SLC25A1/PAPSS2/NCOR1/RHOA/ATP6V1B2/ELOVL7/ATP1B1/NDUFS5/DCAKD/CTNS/ARL2/TGFB1/DPYD/ACOT8/IMPDH1/ACOT7/CMPK1/ATP6V1A/PDE4D	49
GO:0034315	regulation of Arp2/3 complex-mediated actin nucleation	9/1061	31/18614	3.9557e-05	0.00226639	0.00191015	WASF1/NCKAP1/ARF1/WASF2/CYFIP1/CORO1B/WASHC3/WASF3/WASH6P	9
GO:0070972	protein localization to endoplasmic reticulum	15/1061	80/18614	3.98356e-05	0.00226639	0.00191015	BCAP31/RYR2/RAB3GAP2/GPAA1/RTN4/ZFAND2A/OS9/ZFAND2B/UBAC2/RAB10/UBL4A/SRPRA/MAN1A1/TRAM1/GABARAPL2	15
GO:0007160	cell-matrix adhesion	30/1061	239/18614	4.12184e-05	0.00232038	0.00195565	DUSP3/CD63/MACF1/SLC9A1/PTPRA/DMTN/HPSE/ACTG1/ITGA2B/ROCK2/FERMT3/GFUS/DUSP22/TLN1/ZYX/ITGA2/ITGB5/MKLN1/ITGB1/NID2/GSK3B/TNXB/CD96/RHOA/THBS1/MINK1/ROCK1/VCL/CD36/BCR	30
GO:0018107	peptidyl-threonine phosphorylation	18/1061	109/18614	4.20835e-05	0.00232392	0.00195863	ATF2/CDC42BPA/DMTN/STK39/ROCK2/STK11/INPP5K/APP/NLK/SIRT2/GSK3B/PRKCA/EIF4G1/AKT1/CALM3/ROCK1/TGFB1/EGF	18
GO:0018210	peptidyl-threonine modification	19/1061	119/18614	4.21503e-05	0.00232392	0.00195863	ATF2/CDC42BPA/DMTN/STK39/ROCK2/STK11/INPP5K/APP/NLK/SIRT2/GSK3B/PRKCA/EIF4G1/AKT1/CALM3/ROCK1/GALNT1/TGFB1/EGF	19
GO:1903008	organelle disassembly	21/1061	140/18614	4.4291e-05	0.00241702	0.0020371	PLAAT1/HTT/FBXO7/WDR45B/FKBP8/WDR45/CDC37/VCP/GOLGA2/HDAC6/MCTS1/HIF1A/ATP13A2/WIPI1/ASCC2/ATG9A/LRBA/ATG7/FBXL4/SREBF2/GABARAPL2	21
GO:0007033	vacuole organization	28/1061	217/18614	4.48628e-05	0.0024235	0.00204256	ATF2/PACS2/RAB3GAP2/TMEM9/WDR45B/UBXN2A/ACP2/ATP6V0A1/ATP2A2/CHMP6/WDR45/CLN8/LAMTOR1/RALB/ATP6AP2/CHMP5/LAPTM4B/ATP13A2/WIPI1/ATP6AP1/ATG9A/LRBA/ATG7/TPP1/AP3B1/SNAPIN/ATP6V1A/GABARAPL2	28
GO:0072665	protein localization to vacuole	15/1061	81/18614	4.6348e-05	0.00247869	0.00208908	SORT1/VPS41/VPS28/ROCK2/RTN4/MFSD1/CLU/VPS8/NCOA4/GPR137B/ATP13A2/AP3M1/LAMP2/AP3B1/PXK	15
GO:0052547	regulation of peptidase activity	45/1061	425/18614	4.73006e-05	0.00250459	0.0021109	A2M/BCAP31/GSN/COL6A3/CASP9/CDKN2D/SNCA/SERPINB1/USP47/CYCS/BIRC2/ANP32B/LTF/GAPDH/NRDC/ROCK2/MAP3K5/VCP/F2R/AKIRIN2/RAF1/LGMN/SERPING1/STAT3/SERPINI1/APP/CST3/UACA/PRR7/DAP/SPINT2/SYK/ATP13A2/GPX1/P2RX1/RHOA/ATP2A3/AKT1/SERPINB6/SENP1/THBS1/CD109/ECM1/DNAJB6/SVBP	45
GO:0061462	protein localization to lysosome	12/1061	55/18614	4.96048e-05	0.00260085	0.00219203	SORT1/ROCK2/RTN4/MFSD1/CLU/NCOA4/GPR137B/ATP13A2/AP3M1/LAMP2/AP3B1/PXK	12
GO:0072594	establishment of protein localization to organelle	47/1061	453/18614	5.36084e-05	0.00275187	0.00231932	PTTG1IP/IPO11/BCAP31/ATF2/SORT1/FBXO7/RYR2/RAB3GAP2/POT1/MAVS/VPS41/ANGPT1/VPS28/WBP2/ABLIM3/BAP1/ZFAND2A/AKIRIN2/ZFAND2B/CLU/STAT3/KPNA4/VPS8/NCOA4/SYK/ACD/TIMM17B/RAB10/AKT1/UBL4A/AP3M1/APPL2/RUVBL2/SRPRA/MAN1A1/CALM3/CD36/TRAM1/TGFB1/MFF/LAMP2/HACL1/AP3B1/STK3/SREBF2/PXK/FLNA	47
GO:0051893	regulation of focal adhesion assembly	13/1061	64/18614	5.40289e-05	0.00275187	0.00231932	DUSP3/MACF1/SLC9A1/PTPRA/DMTN/ACTG1/ROCK2/DUSP22/TLN1/RHOA/THBS1/ROCK1/VCL	13
GO:0090109	regulation of cell-substrate junction assembly	13/1061	64/18614	5.40289e-05	0.00275187	0.00231932	DUSP3/MACF1/SLC9A1/PTPRA/DMTN/ACTG1/ROCK2/DUSP22/TLN1/RHOA/THBS1/ROCK1/VCL	13
GO:0006874	intracellular calcium ion homeostasis	35/1061	303/18614	5.7124e-05	0.00288196	0.00242895	HTT/BCAP31/TPCN1/PLCB4/PACS2/RYR2/SNCA/TMBIM6/PLCH1/ATP2A2/SLC24A3/GSTO1/F2R/CCDC47/YWHAE/VAPB/HTR2A/APP/PRKCB/SLC35G1/MCUR1/ATP13A2/GP1BA/P2RX1/ATP2A3/DIAPH1/ATP1B1/RAP1GDS1/GP9/CALM3/MICU1/RASA3/FLNA/UBASH3B/PDE4D	35
GO:0000422	autophagy of mitochondrion	16/1061	92/18614	5.81996e-05	0.00288196	0.00242895	HTT/FBXO7/WDR45B/FKBP8/WDR45/CDC37/HDAC6/HIF1A/ATP13A2/WIPI1/ATG9A/LRBA/ATG7/FBXL4/SREBF2/GABARAPL2	16
GO:0061726	mitochondrion disassembly	16/1061	92/18614	5.81996e-05	0.00288196	0.00242895	HTT/FBXO7/WDR45B/FKBP8/WDR45/CDC37/HDAC6/HIF1A/ATP13A2/WIPI1/ATG9A/LRBA/ATG7/FBXL4/SREBF2/GABARAPL2	16
GO:0002698	negative regulation of immune effector process	19/1061	122/18614	5.98546e-05	0.00293672	0.00247511	A2M/IRAK3/CD47/TMBIM6/NLRX1/ANGPT1/FER/JAK3/LOXL3/DUSP22/HLA-G/SERPING1/HLA-E/TNFSF4/CD46/NDFIP1/CD96/TGFB1/BCR	19
GO:0051125	regulation of actin nucleation	10/1061	40/18614	6.12487e-05	0.0029778	0.00250973	WASF1/GSN/NCKAP1/ARF1/WASF2/CYFIP1/CORO1B/WASHC3/WASF3/WASH6P	10
GO:0140029	exocytic process	15/1061	83/18614	6.22294e-05	0.00299822	0.00252695	VTI1B/SNCA/EXOC5/SNAP23/DMTN/SNAP29/SLC18A2/RALB/NAPA/STXBP2/PLEK/SYK/STX1A/P2RX1/SNAPIN	15
GO:0007034	vacuolar transport	23/1061	165/18614	6.37298e-05	0.00300495	0.00253261	SORT1/VTI1B/UBXN6/VPS41/VPS28/CHMP6/VCP/VTA1/CLU/CHMP5/RILP/NDFIP1/VPS8/NCOA4/ATP13A2/PSAP/AP3M1/SCYL2/LAMP2/AP3B1/SNAPIN/PXK/AP3S1	23
GO:0010324	membrane invagination	13/1061	65/18614	6.40546e-05	0.00300495	0.00253261	GSN/SNX9/ARF1/ANO6/ITGA2/CLCN3/BIN2/RHOA/THBS1/APPL2/CD36/SNX3/MYH9	13
GO:0048857	neural nucleus development	13/1061	65/18614	6.40546e-05	0.00300495	0.00253261	MAOB/ATF2/YWHAH/NFIB/G6PD/YWHAE/MAPKAP1/CKB/SIRT2/CCDC14/RHOA/CALM3/ACTB	13
GO:0007035	vacuolar acidification	9/1061	33/18614	6.82577e-05	0.00307055	0.0025879	TMEM9/ATP6V0A1/ATP6AP2/CLIC4/ATP6V1B2/ATP6AP1/ATP6V0E1/SNAPIN/ATP6V1A	9
GO:0034111	negative regulation of homotypic cell-cell adhesion	6/1061	14/18614	6.83237e-05	0.00307055	0.0025879	CD9/ALOX12/RDX/SH2B3/ABAT/UBASH3B	6
GO:0048388	endosomal lumen acidification	6/1061	14/18614	6.83237e-05	0.00307055	0.0025879	TMEM9/ATP6V0A1/ATP6AP2/CLCN3/ATP6AP1/ATP6V1A	6
GO:0051127	positive regulation of actin nucleation	6/1061	14/18614	6.83237e-05	0.00307055	0.0025879	WASF1/GSN/NCKAP1/WASF2/CYFIP1/WASF3	6
GO:1904152	regulation of retrograde protein transport, ER to cytosol	6/1061	14/18614	6.83237e-05	0.00307055	0.0025879	BCAP31/UBE2J1/UBE2G2/OS9/UBAC2/DERL2	6
GO:0000281	mitotic cytokinesis	15/1061	84/18614	7.18231e-05	0.00312941	0.00263751	STAMBP/EXOC5/SNX9/CHMP6/ROCK2/ARF1/RHOC/CFL1/SEPTIN6/CHMP5/RHOA/ANK3/EFHC1/ROCK1/KIF20B	15
GO:0033866	nucleoside bisphosphate biosynthetic process	12/1061	57/18614	7.19742e-05	0.00312941	0.00263751	SNCA/PAPSS1/DIP2A/ACSL4/ACSS2/ACSBG1/ACSL1/SLC25A1/PAPSS2/ELOVL7/DCAKD/ACOT7	12
GO:0034030	ribonucleoside bisphosphate biosynthetic process	12/1061	57/18614	7.19742e-05	0.00312941	0.00263751	SNCA/PAPSS1/DIP2A/ACSL4/ACSS2/ACSBG1/ACSL1/SLC25A1/PAPSS2/ELOVL7/DCAKD/ACOT7	12
GO:0034033	purine nucleoside bisphosphate biosynthetic process	12/1061	57/18614	7.19742e-05	0.00312941	0.00263751	SNCA/PAPSS1/DIP2A/ACSL4/ACSS2/ACSBG1/ACSL1/SLC25A1/PAPSS2/ELOVL7/DCAKD/ACOT7	12
GO:0071868	cellular response to monoamine stimulus	17/1061	104/18614	7.77543e-05	0.00332664	0.00280374	RYR2/SNCA/SLC9A1/GABPA/GNB1/GNA15/MAPK3/HTR2A/APP/GNAQ/SIRT2/GSK3B/GNAZ/GNAO1/GNB5/FLNA/DNM2	17
GO:0071870	cellular response to catecholamine stimulus	17/1061	104/18614	7.77543e-05	0.00332664	0.00280374	RYR2/SNCA/SLC9A1/GABPA/GNB1/GNA15/MAPK3/HTR2A/APP/GNAQ/SIRT2/GSK3B/GNAZ/GNAO1/GNB5/FLNA/DNM2	17
GO:0043393	regulation of protein binding	26/1061	201/18614	7.94003e-05	0.0033701	0.00284037	MAPRE1/MFNG/PSME3IP1/TMBIM6/USP33/DHRS7B/ATP2A2/ANGPT1/LDLRAP1/CTNNBIP1/RALB/GOLGA2/MAPK3/APP/PTPRF/GSK3B/FLOT1/ATP2A3/AKT1/AMFR/ROCK1/ACTB/STK3/SNAPIN/PPP2CB/UBASH3B	26
GO:0099024	plasma membrane invagination	12/1061	58/18614	8.60971e-05	0.00362557	0.00305568	GSN/SNX9/ARF1/ANO6/ITGA2/CLCN3/BIN2/RHOA/THBS1/APPL2/CD36/MYH9	12
GO:0002092	positive regulation of receptor internalization	8/1061	27/18614	9.10275e-05	0.00380324	0.00320543	CD63/AP2M1/ANGPT1/ARRB1/SYK/TBC1D5/SCYL2/EGF	8
GO:0048041	focal adhesion assembly	15/1061	86/18614	9.49561e-05	0.00393663	0.00331785	DUSP3/MACF1/SLC9A1/PTPRA/DMTN/ACTG1/ROCK2/DUSP22/TLN1/ITGA2/RHOA/THBS1/ROCK1/VCL/BCR	15
GO:0031333	negative regulation of protein-containing complex assembly	21/1061	148/18614	0.000100943	0.00415265	0.00349991	MAPRE1/GSN/CAPZB/SNCA/DMTN/BIRC2/CTNNBIP1/RAF1/TMOD1/HDAC6/CLU/FLII/TWF2/SIRT2/GSK3B/MKKS/TMOD3/SPTB/RDX/SSH1/VDAC2	21
GO:0010639	negative regulation of organelle organization	39/1061	362/18614	0.000102556	0.00418681	0.0035287	MAPRE1/KAT2B/GSN/TOM1L1/CAPZB/ERCC1/SNCA/POT1/NBDY/DMTN/MPHOSPH9/TAOK1/KATNB1/TOM1L2/INPP5K/TMOD1/HDAC6/WASF2/CLU/FLII/MDM1/TWF2/TINF2/CORO1B/ACD/GPX1/MKKS/TMOD3/AKT1/PPIF/XRCC1/SPTB/RDX/ZNF207/DCP2/TBC1D7/TBC1D7-LOC100130357/SSH1/DNM2	39
GO:1901653	cellular response to peptide	40/1061	375/18614	0.000104345	0.00422757	0.00356305	KLF3/KAT2B/GRB10/MYO5A/SLC27A4/SLC9A1/PTPRA/IGF1R/ROCK2/FER/JAK3/PTPN11/RAF1/LGMN/MAPK3/INPP5K/MYO1C/STAT3/CYFIP1/CHMP5/APP/ABCC1/PRKCB/SH2B2/GRB2/GSK3B/RAB10/RB1/AKT1/RAP1GDS1/APPL2/CCND3/ROCK1/GNAI2/CD36/AGTRAP/AP3S1/SNX5/MAX/NFE2L2	40
GO:0071867	response to monoamine	17/1061	107/18614	0.000111849	0.00446393	0.00376226	RYR2/SNCA/SLC9A1/GABPA/GNB1/GNA15/MAPK3/HTR2A/APP/GNAQ/SIRT2/GSK3B/GNAZ/GNAO1/GNB5/FLNA/DNM2	17
GO:0071869	response to catecholamine	17/1061	107/18614	0.000111849	0.00446393	0.00376226	RYR2/SNCA/SLC9A1/GABPA/GNB1/GNA15/MAPK3/HTR2A/APP/GNAQ/SIRT2/GSK3B/GNAZ/GNAO1/GNB5/FLNA/DNM2	17
GO:0006887	exocytosis	38/1061	351/18614	0.000113074	0.00447941	0.00377531	TMEM167A/CBL/VTI1B/STX4/SNCA/EXOC5/SNAP23/RAB3IP/SNX19/WDR41/SEPTIN4/DMTN/ATP2A2/SNAP29/SLC18A2/FER/ABCC4/RALB/NAPA/STXBP2/PLEK/SEPTIN2/PRKCB/RAB11B/SYK/ATP13A2/WASHC3/RAB10/STX1A/P2RX1/CDK16/CALM3/GNAI2/UNC13D/BCR/MYH9/SNAPIN/WASH6P	38
GO:0070862	negative regulation of protein exit from endoplasmic reticulum	5/1061	10/18614	0.000118037	0.00460775	0.00388348	UBE2J1/UBE2G2/OS9/UBAC2/DERL2	5
GO:0098885	modification of postsynaptic actin cytoskeleton	5/1061	10/18614	0.000118037	0.00460775	0.00388348	WASF1/CYFIP1/RHOA/SPTB/WASF3	5
GO:0055074	calcium ion homeostasis	36/1061	327/18614	0.000121196	0.00469487	0.0039569	HTT/BCAP31/TPCN1/PLCB4/PACS2/RYR2/SNCA/TMBIM6/PLCH1/ATP2A2/SLC24A3/GSTO1/ANKH/F2R/CCDC47/YWHAE/VAPB/HTR2A/APP/PRKCB/SLC35G1/MCUR1/ATP13A2/GP1BA/P2RX1/ATP2A3/DIAPH1/ATP1B1/RAP1GDS1/GP9/CALM3/MICU1/RASA3/FLNA/UBASH3B/PDE4D	36
GO:0150116	regulation of cell-substrate junction organization	13/1061	69/18614	0.000122025	0.00469487	0.0039569	DUSP3/MACF1/SLC9A1/PTPRA/DMTN/ACTG1/ROCK2/DUSP22/TLN1/RHOA/THBS1/ROCK1/VCL	13
GO:0035304	regulation of protein dephosphorylation	15/1061	88/18614	0.000124336	0.00474962	0.00400304	HTT/ROCK2/PTPA/ANKLE2/ARPP19/YWHAE/SMPD1/GSK3B/PPP6R1/PPP6R3/CALM3/ROCK1/GNAI2/GNA12/TGFB1	15
GO:0000910	cytokinesis	24/1061	185/18614	0.000140652	0.00533478	0.00449623	SETD2/STAMBP/CETN2/EXOC5/SEPTIN4/SNX9/IGF1R/CHMP6/ROCK2/ARF1/RHOC/CFL1/SEPTIN6/CHMP5/SEPTIN2/ANXA11/CDC14B/RHOA/ANK3/EFHC1/CALM3/ROCK1/KIF20B/MYH9	24
GO:0048488	synaptic vesicle endocytosis	13/1061	70/18614	0.000142144	0.00535341	0.00451192	SNCA/AP2M1/ACTG1/DNM1/DNM3/STX1A/AP2S1/VAMP4/CALM3/ROCK1/ACTB/AP3S1/DNM2	13
GO:0090317	negative regulation of intracellular protein transport	10/1061	44/18614	0.000145653	0.00544723	0.004591	GDI1/UBE2J1/DMTN/ANGPT1/UBE2G2/OS9/INPP5K/UBAC2/DERL2/CD36	10
GO:0045732	positive regulation of protein catabolic process	26/1061	209/18614	0.000151604	0.0056304	0.00474538	BCAP31/RNF14/RCHY1/VGLL4/SNX1/SNX9/MARCHF2/VPS28/NRDC/MSN/VCP/ZFAND2A/CLU/DDA1/RILP/SIRT2/NDFIP1/GSK3B/OAZ1/AKT1/CUL4B/RDX/ATG7/PSMC5/RNF40/NFE2L2	26
GO:0051098	regulation of binding	39/1061	369/18614	0.000153635	0.00566647	0.00477578	MAPRE1/SENP2/MFNG/PSME3IP1/TMBIM6/USP33/DHRS7B/ATP2A2/ANGPT1/LDLRAP1/CTNNBIP1/RALB/GOLGA2/SMAD2/MAPK3/APP/ITGA2/HMGA2/PTPRF/SIRT2/GSK3B/ACD/FLOT1/EIF4G1/SUMO3/RB1/ATP2A3/AKT1/FBH1/AMFR/CALM3/ROCK1/TGFB1/EGF/ACTB/STK3/SNAPIN/PPP2CB/UBASH3B	39
GO:0032272	negative regulation of protein polymerization	14/1061	80/18614	0.000155118	0.00568198	0.00478885	MAPRE1/GSN/CAPZB/SNCA/DMTN/TMOD1/FLII/TWF2/MKKS/TMOD3/SPTB/RDX/SSH1/VDAC2	14
GO:0038127	ERBB signaling pathway	19/1061	131/18614	0.00015859	0.00570496	0.00480822	DUSP3/CBL/REPS2/NCK2/CHMP6/FER/RTN4/PTPN12/PTPN11/RALB/LGMN/DGKD/SH3TC2/GRB2/SHKBP1/AKT1/TGFB1/EGF/SNX5	19
GO:0030970	retrograde protein transport, ER to cytosol	8/1061	29/18614	0.000158945	0.00570496	0.00480822	BCAP31/UBE2J1/UBE2G2/VCP/OS9/UBAC2/DERL2/SEL1L	8
GO:1903513	endoplasmic reticulum to cytosol transport	8/1061	29/18614	0.000158945	0.00570496	0.00480822	BCAP31/UBE2J1/UBE2G2/VCP/OS9/UBAC2/DERL2/SEL1L	8
GO:0022406	membrane docking	15/1061	90/18614	0.00016132	0.0057516	0.00484753	VTI1B/PACS2/STX4/EXOC5/RAB3IP/ATP2A2/SNAP29/MSN/RALB/STXBP2/VAPB/PLEK/STX1A/ROCK1/SNX3	15
GO:1903828	negative regulation of protein localization	26/1061	210/18614	0.000163863	0.00580357	0.00489133	ABHD17A/GDI1/AP2M1/LYPLA1/CTNNA1/UBE2J1/DMTN/ANGPT1/ROCK2/UBE2G2/PTPN11/F2R/OS9/INPP5K/MAP1A/PFKL/UBAC2/NDFIP1/GSK3B/NUMB/TMBIM1/DERL2/GNAZ/CD36/TGFB1/SNX3	26
GO:0034497	protein localization to phagophore assembly site	6/1061	16/18614	0.00016507	0.00580785	0.00489494	PACS2/WDR45B/WDR45/WIPI1/ATG9A/LRBA	6
GO:1990778	protein localization to cell periphery	37/1061	345/18614	0.000167485	0.00584398	0.00492539	BSG/HYCC2/VTI1B/PACS2/MYO5A/ZDHHC2/STX4/BLZF1/EXOC5/AP2M1/MACF1/LYPLA1/LDLRAP1/PKP2/ROCK2/TTC7B/BBIP1/TSPAN14/INPP5K/PACS1/PGRMC1/ADAM10/TSPAN33/ITGB1/NUMB/FLOT1/TMBIM1/RAB10/AKT1/ANK3/ATP1B1/ATP6AP1/RDX/ROCK1/TGFB1/ACTB/FLNA	37
GO:2000116	regulation of cysteine-type endopeptidase activity	28/1061	234/18614	0.000168282	0.00584398	0.00492539	BCAP31/GSN/CASP9/CDKN2D/SNCA/USP47/CYCS/BIRC2/ANP32B/LTF/MAP3K5/VCP/F2R/RAF1/LGMN/CST3/UACA/PRR7/DAP/SYK/GPX1/P2RX1/RHOA/ATP2A3/AKT1/SENP1/THBS1/DNAJB6	28
GO:0071375	cellular response to peptide hormone stimulus	34/1061	308/18614	0.000175644	0.00605807	0.00510583	KAT2B/GRB10/MYO5A/SLC27A4/SLC9A1/PTPRA/IGF1R/ROCK2/FER/JAK3/PTPN11/RAF1/MAPK3/INPP5K/MYO1C/STAT3/CYFIP1/PRKCB/SH2B2/GRB2/GSK3B/RAB10/RB1/AKT1/RAP1GDS1/APPL2/CCND3/ROCK1/GNAI2/AGTRAP/AP3S1/SNX5/MAX/NFE2L2	34
GO:0032869	cellular response to insulin stimulus	26/1061	211/18614	0.000176996	0.00605807	0.00510583	KAT2B/GRB10/MYO5A/SLC27A4/SLC9A1/PTPRA/IGF1R/FER/PTPN11/RAF1/MAPK3/INPP5K/MYO1C/CYFIP1/PRKCB/SH2B2/GRB2/GSK3B/RAB10/RB1/AKT1/APPL2/CCND3/GNAI2/AP3S1/SNX5	26
GO:0036465	synaptic vesicle recycling	14/1061	81/18614	0.000177845	0.00605807	0.00510583	SNCA/AP2M1/ACTG1/DNM1/DNM3/CYFIP1/STX1A/AP2S1/VAMP4/CALM3/ROCK1/ACTB/AP3S1/DNM2	14
GO:0034976	response to endoplasmic reticulum stress	30/1061	259/18614	0.000179331	0.00607	0.00511588	BCAP31/NR1H2/PARP6/UBXN6/TMBIM6/NCK2/UBE2J1/ATP2A2/P4HB/MAP3K5/UBE2G2/VCP/OS9/CCDC47/CLU/VAPB/UBAC2/GSK3B/UBE4B/FLOT1/EIF4G1/DERL2/ATP2A3/THBS1/AMFR/MAN1A1/RASGRF2/SEL1L/PPP2CB/NFE2L2	30
GO:0031667	response to nutrient levels	47/1061	477/18614	0.000183908	0.00618577	0.00521346	A2M/NR1H2/ATF2/CBL/WDR45B/CDKN2D/ERCC1/USP33/SLC27A4/GAS2L1/VPS41/GCLM/IGFBP2/NPRL3/STK39/IGF1R/G6PD/USF2/WDR45/MAP3K5/TNRC6A/RALB/MAPK3/ACSL1/MAPKAP1/TBXA2R/COMT/ITGA2/GLUL/DAP/SIRT2/SPX/GPX1/MKKS/WIPI1/TBC1D5/EIF4G1/AKT1/APPL2/ATG7/GNAI2/LARP1/LAMP2/SREBF2/GABARAPL2/MAX/NFE2L2	47
GO:0009259	ribonucleotide metabolic process	46/1061	464/18614	0.000186553	0.00622096	0.00524311	GUK1/PDE2A/SNCA/PAPSS1/PGK1/PFKP/DIP2A/ENO1/NDUFA5/ACSL4/ACSS2/GAPDH/GUCY1B1/GMPR2/ACSBG1/VCP/ACSM3/NME4/PFKL/STAT3/TPST2/ACSL1/HTR2A/APP/DMAC2L/HIF1A/ADCY3/SLC25A1/PAPSS2/NCOR1/RHOA/ATP6V1B2/ELOVL7/ATP1B1/NDUFS5/DCAKD/CTNS/ARL2/TGFB1/DPYD/ACOT8/IMPDH1/ACOT7/CMPK1/ATP6V1A/PDE4D	46
GO:0016482	cytosolic transport	23/1061	177/18614	0.00018728	0.00622096	0.00524311	SORT1/VTI1B/TBC1D17/SNX1/MSN/AP2A1/RAB6A/MAPK3/VPS26B/RILP/WIPI1/TBC1D5/EPS15/TBC1D23/RDX/RAB6B/SNX3/MTMR2/PXK/BLTP3B/FLNA/WASH6P/SNX5	23
GO:0140238	presynaptic endocytosis	13/1061	72/18614	0.000191063	0.00629708	0.00530727	SNCA/AP2M1/ACTG1/DNM1/DNM3/STX1A/AP2S1/VAMP4/CALM3/ROCK1/ACTB/AP3S1/DNM2	13
GO:0031647	regulation of protein stability	35/1061	322/18614	0.000191927	0.00629708	0.00530727	HTT/ZSWIM7/SENP2/GSN/FBXW11/FBXO7/TNIP2/TADA3/SNCA/USP33/BAG1/RABL3/GAPDH/RTN4/CTSA/CDC37/MFSD1/HDAC6/CMTM6/CLU/GNAQ/NLK/CCDC88C/FLOT1/USP4/UBL4A/ATP1B1/RUVBL2/ZNF207/DPM2/LAMP2/STK3/SEL1L/FLNA/POLR2E	35
GO:0001885	endothelial cell development	12/1061	63/18614	0.000198076	0.00645922	0.00544392	PDE2A/PECAM1/HPSE/PTPRS/ROCK2/MSN/GPX1/CLIC4/RDX/ROCK1/VCL/PDE4D	12
GO:0035855	megakaryocyte development	7/1061	23/18614	0.000209619	0.0067942	0.00572624	PTPN11/WASF2/GP1BA/GP9/SH2B3/MPIG6B/FLNA	7
GO:0006936	muscle contraction	37/1061	349/18614	0.000210981	0.00679716	0.00572874	DOCK5/GSN/RYR2/SLC9A1/MYL9/TPM4/ENO1/ATP2A2/GSTO1/TPM3/PKP2/TPM1/ROCK2/SMTN/F2R/TMOD1/HTR2A/TBXA2R/TPM2/ITGA2/SPX/MYL6B/MYOM2/MKKS/TMOD3/P2RX1/RHOA/GAMT/ATP1B1/RAP1GDS1/CALM3/ROCK1/ABAT/GNAO1/SCN1B/FLNA/PDE4D	37
GO:0034314	Arp2/3 complex-mediated actin nucleation	10/1061	46/18614	0.000215716	0.00686696	0.00578757	WASF1/NCKAP1/ARF1/ARPC5/WASF2/CYFIP1/CORO1B/WASHC3/WASF3/WASH6P	10
GO:0047496	vesicle transport along microtubule	10/1061	46/18614	0.000215716	0.00686696	0.00578757	HTT/KIFAP3/FBXW11/TRAK2/STK11/AP3M1/AP3B1/SNAPIN/AP3S1/DYNC1I1	10
GO:0031032	actomyosin structure organization	25/1061	202/18614	0.000218355	0.00690984	0.00582371	MEF2A/CD47/CDC42BPA/CNN2/SLC9A1/MYL9/ACTG1/TPM1/ROCK2/ARRB1/WDR1/RHOC/INPP5K/TMOD1/WASF2/FLII/ZYX/ITGB5/ITGB1/MYOM2/MKKS/TMOD3/RHOA/ROCK1/MYH9	25
GO:0061640	cytoskeleton-dependent cytokinesis	17/1061	113/18614	0.000221057	0.00695418	0.00586108	STAMBP/EXOC5/SEPTIN4/SNX9/CHMP6/ROCK2/ARF1/RHOC/CFL1/SEPTIN6/CHMP5/SEPTIN2/RHOA/ANK3/EFHC1/ROCK1/KIF20B	17
GO:0044539	long-chain fatty acid import into cell	6/1061	17/18614	0.000242843	0.00759487	0.00640106	SLC27A4/ACSL1/SPX/AKT1/THBS1/CD36	6
GO:0045862	positive regulation of proteolysis	38/1061	365/18614	0.000251733	0.00782715	0.00659683	BCAP31/GSN/FBXW11/CASP9/SNCA/RNF14/RCHY1/CYCS/SNX9/ENO1/ANP32B/NRDC/ROCK2/MAP3K5/VCP/ZFAND2A/F2R/AKIRIN2/LGMN/CLU/STAT3/UACA/PRR7/DDA1/DAP/SIRT2/GSK3B/SYK/P2RX1/RHOA/ATP2A3/AKT1/SENP1/PSMC5/RNF40/EGF/MYH9/NFE2L2	38
GO:0043281	regulation of cysteine-type endopeptidase activity involved in apoptotic process	25/1061	204/18614	0.000254592	0.00787028	0.00663318	BCAP31/GSN/CASP9/CDKN2D/SNCA/USP47/CYCS/BIRC2/ANP32B/MAP3K5/VCP/F2R/RAF1/UACA/PRR7/DAP/SYK/GPX1/P2RX1/RHOA/ATP2A3/AKT1/SENP1/THBS1/DNAJB6	25
GO:0003018	vascular process in circulatory system	30/1061	265/18614	0.000267697	0.00822783	0.00693453	DOCK5/PTP4A3/TBXAS1/PDE2A/SLC27A4/SLC6A6/GCLM/SLC24A3/ANGPT1/SLC44A1/ROCK2/SLCO3A1/ABCC4/CTNNBIP1/F2R/SLC2A3/HTR2A/TBXA2R/ABCC1/HBB/GPX1/MKKS/P2RX1/RHOA/ATP2A3/RAP1GDS1/ROCK1/CD36/TGFB1/BCR	30
GO:0009150	purine ribonucleotide metabolic process	44/1061	445/18614	0.000270345	0.00824852	0.00695196	GUK1/PDE2A/SNCA/PAPSS1/PGK1/PFKP/DIP2A/ENO1/NDUFA5/ACSL4/ACSS2/GAPDH/GUCY1B1/GMPR2/ACSBG1/VCP/ACSM3/NME4/PFKL/STAT3/TPST2/ACSL1/HTR2A/APP/DMAC2L/HIF1A/ADCY3/SLC25A1/PAPSS2/NCOR1/RHOA/ATP6V1B2/ELOVL7/ATP1B1/NDUFS5/DCAKD/CTNS/ARL2/TGFB1/ACOT8/IMPDH1/ACOT7/ATP6V1A/PDE4D	44
GO:0009267	cellular response to starvation	22/1061	170/18614	0.000271455	0.00824852	0.00695196	ATF2/WDR45B/USP33/GAS2L1/VPS41/NPRL3/IGF1R/WDR45/MAP3K5/TNRC6A/RALB/MAPK3/COMT/GLUL/DAP/WIPI1/ATG7/LAMP2/SREBF2/GABARAPL2/MAX/NFE2L2	22
GO:0051261	protein depolymerization	17/1061	115/18614	0.00027393	0.0082767	0.00697572	GSN/CAPZB/DMTN/DSTN/TAOK1/WDR1/KATNB1/CFL1/MAP1A/TMOD1/HDAC6/PLEK/FLII/TWF2/TMOD3/SPTB/RDX	17
GO:0030099	myeloid cell differentiation	42/1061	421/18614	0.000306029	0.00919461	0.00774934	TCTA/ABCB10/CASP9/ALAS2/FECH/DHRS7B/DMTN/CLEC1B/G6PD/NBEAL2/LTF/TSPAN2/GABPA/BAP1/WDR1/PTPN11/CTNNBIP1/GPR137/FAXDC2/WASF2/STAT3/APP/HIF1A/NDFIP1/GPR137B/OSTM1/PRKCA/GP1BA/MPL/RB1/TMOD3/ATP6AP1/GP9/SH2B3/CD109/TGFB1/MYH9/MPIG6B/AP3B1/MTURN/FLNA/UBASH3B	42
GO:1903320	regulation of protein modification by small protein conjugation or removal	29/1061	255/18614	0.000311322	0.0093014	0.00783935	PTTG1IP/SENP2/HMG20B/TOLLIP/RCHY1/UBXN2A/TRIP12/SEPTIN4/BIRC2/ANGPT1/VPS28/COPS3/ARRB1/UBE2C/VCP/HIF1A/PRR7/NDFIP1/CDC14B/USP4/DCUN1D1/AKT1/WBP1L/COPS4/RNF40/TBC1D7/TBC1D7-LOC100130357/UBB/SVBP	29
GO:0042594	response to starvation	25/1061	207/18614	0.000318921	0.00944932	0.00796402	ATF2/CBL/WDR45B/USP33/GAS2L1/VPS41/NPRL3/IGF1R/WDR45/MAP3K5/TNRC6A/RALB/MAPK3/COMT/GLUL/DAP/WIPI1/TBC1D5/ATG7/LARP1/LAMP2/SREBF2/GABARAPL2/MAX/NFE2L2	25
GO:0010970	transport along microtubule	22/1061	172/18614	0.000320625	0.00944932	0.00796402	HTT/WASF1/KIFAP3/FBXW11/SSX2IP/ARMCX3/TRAK2/KXD1/RAB6A/IFT122/STK11/ARHGAP21/MAP1A/HDAC6/APP/HIF1A/AP3M1/UBB/AP3B1/SNAPIN/AP3S1/DYNC1I1	22
GO:0045010	actin nucleation	11/1061	57/18614	0.000321574	0.00944932	0.00796402	WASF1/GSN/NCKAP1/ARF1/ARPC5/WASF2/CYFIP1/CORO1B/WASHC3/WASF3/WASH6P	11
GO:1903036	positive regulation of response to wounding	13/1061	76/18614	0.000333258	0.00945397	0.00796793	DMTN/HPSE/IGF1R/ACTG1/F2R/ANO6/TBXA2R/PRDX2/ITGB1/THBS1/CD36/FLNA/NFE2L2	13
GO:0010644	cell communication by electrical coupling	8/1061	32/18614	0.000334425	0.00945397	0.00796793	IRX3/RYR2/PKP2/ANK3/ATP1B1/CALM3/DBN1/PDE4D	8
GO:0007044	cell-substrate junction assembly	15/1061	96/18614	0.000334934	0.00945397	0.00796793	DUSP3/MACF1/SLC9A1/PTPRA/DMTN/ACTG1/ROCK2/DUSP22/TLN1/ITGA2/RHOA/THBS1/ROCK1/VCL/BCR	15
GO:0032091	negative regulation of protein binding	15/1061	96/18614	0.000334934	0.00945397	0.00796793	PSME3IP1/TMBIM6/USP33/DHRS7B/ATP2A2/CTNNBIP1/RALB/GOLGA2/MAPK3/PTPRF/GSK3B/ATP2A3/AKT1/ROCK1/ACTB	15
GO:0090331	negative regulation of platelet aggregation	5/1061	12/18614	0.000336976	0.00945397	0.00796793	CD9/ALOX12/SH2B3/ABAT/UBASH3B	5
GO:1905668	positive regulation of protein localization to endosome	5/1061	12/18614	0.000336976	0.00945397	0.00796793	ABHD17A/ROCK2/MSN/RDX/EGF	5
GO:0016233	telomere capping	9/1061	40/18614	0.000337642	0.00945397	0.00796793	ERCC1/POT1/DCLRE1A/MAPK3/TINF2/ACD/XRCC1/MRE11/NEK7	9
GO:0051693	actin filament capping	9/1061	40/18614	0.000337642	0.00945397	0.00796793	GSN/CAPZB/DMTN/TMOD1/FLII/TWF2/TMOD3/SPTB/RDX	9
GO:0071634	regulation of transforming growth factor beta production	9/1061	40/18614	0.000337642	0.00945397	0.00796793	ATF2/CD2AP/ATP6AP2/LTBP1/CD46/HIF1A/LAPTM4B/TNXB/THBS1	9
GO:2000377	regulation of reactive oxygen species metabolic process	20/1061	150/18614	0.000341058	0.00949988	0.00800663	SNCA/ARF4/BIRC2/G6PD/SLC18A2/HDAC6/HIF1A/PRDX2/CLCN3/GRB2/SIRT2/SYK/RHOA/THBS1/GNAI2/CD36/CTNS/TGFB1/BCR/NFE2L2	20
GO:0008286	insulin receptor signaling pathway	18/1061	128/18614	0.000344797	0.00955109	0.00804979	GRB10/SLC27A4/PTPRA/IGF1R/FER/PTPN11/RAF1/MAPK3/INPP5K/PRKCB/SH2B2/GRB2/GSK3B/AKT1/CCND3/GNAI2/AP3S1/SNX5	18
GO:0051346	negative regulation of hydrolase activity	36/1061	345/18614	0.000346468	0.00955109	0.00804979	A2M/SORT1/COL6A3/CDKN2D/SNCA/TMBIM6/SERPINB1/SLC27A4/USP47/BIRC2/LTF/GAPDH/ROCK2/PTPA/RAF1/SERPING1/SERPINI1/APP/CST3/GSK3B/SPINT2/GPX1/MKKS/AKT1/SERPINB6/THBS1/RAP1GDS1/RDX/ROCK1/GNAI2/ARL2/CD109/ECM1/SEMA4D/DNAJB6/GMIP	36
GO:0061028	establishment of endothelial barrier	10/1061	49/18614	0.000372311	0.0102109	0.00860587	PDE2A/PECAM1/HPSE/PTPRS/ROCK2/MSN/RDX/ROCK1/VCL/PDE4D	10
GO:1905475	regulation of protein localization to membrane	22/1061	175/18614	0.000409008	0.0111005	0.00935562	VTI1B/GSN/ZDHHC2/GDI1/STX4/AP2M1/LYPLA1/DMTN/LDLRAP1/INPP5K/MYO1C/PGRMC1/STOM/ADAM10/ITGB1/NUMB/TMBIM1/AKT1/ANK3/TGFB1/MFF/ACTB	22
GO:0032509	endosome transport via multivesicular body sorting pathway	9/1061	41/18614	0.000410974	0.0111005	0.00935562	SORT1/UBXN6/VPS28/CHMP6/VCP/VTA1/CHMP5/LAPTM4B/RILP	9
GO:0098751	bone cell development	9/1061	41/18614	0.000410974	0.0111005	0.00935562	LTF/PTPN11/WASF2/GP1BA/ATP6AP1/GP9/SH2B3/MPIG6B/FLNA	9
GO:1905476	negative regulation of protein localization to membrane	8/1061	33/18614	0.000419598	0.0112764	0.00950393	GDI1/AP2M1/LYPLA1/DMTN/INPP5K/NUMB/TMBIM1/TGFB1	8
GO:0051494	negative regulation of cytoskeleton organization	21/1061	164/18614	0.000427666	0.0114358	0.00963823	MAPRE1/KAT2B/GSN/CAPZB/SNCA/DMTN/TAOK1/KATNB1/INPP5K/TMOD1/HDAC6/WASF2/FLII/MDM1/TWF2/CORO1B/MKKS/TMOD3/SPTB/RDX/SSH1	21
GO:0030705	cytoskeleton-dependent intracellular transport	25/1061	212/18614	0.00045827	0.0121932	0.0102766	HTT/WASF1/KIFAP3/MYO5A/FBXW11/SSX2IP/ARMCX3/TRAK2/KXD1/RAB6A/IFT122/STK11/ARHGAP21/MAP1A/HDAC6/MYO1C/APP/HIF1A/CCDC88C/AP3M1/UBB/AP3B1/SNAPIN/AP3S1/DYNC1I1	25
GO:0140694	non-membrane-bounded organelle assembly	39/1061	390/18614	0.00047181	0.0124437	0.0104877	MAPRE1/DOCK5/CETN2/MEF2A/KAT2B/CSDE1/GSN/LSM14A/TRAF7/MYL9/NBDY/ACTG1/CHMP6/TPM1/MSN/WDR1/GOLGA2/DBNL/TMOD1/CHMP5/FLII/MDM1/CENPK/ITGB1/BIN2/MYOM2/CDK2/TMOD3/NCOR1/RHOA/CEP135/CDS2/STAG2/ZNF207/ATXN2/OGFOD1/FLNA/NEK7/SENP6	39
GO:0035372	protein localization to microtubule	6/1061	19/18614	0.000482506	0.0124437	0.0104877	MAPRE1/ABHD17A/GAS2L1/MAP1A/DIAPH1/KIF20B	6
GO:0071800	podosome assembly	6/1061	19/18614	0.000482506	0.0124437	0.0104877	DOCK5/GSN/MSN/DBNL/BIN2/RHOA	6
GO:0140354	lipid import into cell	6/1061	19/18614	0.000482506	0.0124437	0.0104877	SLC27A4/ACSL1/SPX/AKT1/THBS1/CD36	6
GO:1900242	regulation of synaptic vesicle endocytosis	6/1061	19/18614	0.000482506	0.0124437	0.0104877	AP2M1/ACTG1/VAMP4/CALM3/ROCK1/ACTB	6
GO:1905146	lysosomal protein catabolic process	6/1061	19/18614	0.000482506	0.0124437	0.0104877	MARCHF2/LAPTM4B/ATP13A2/DPP7/TPP1/LAMP2	6
GO:0032469	endoplasmic reticulum calcium ion homeostasis	7/1061	26/18614	0.000483974	0.0124437	0.0104877	BCAP31/PACS2/TMBIM6/ATP2A2/CCDC47/APP/RAP1GDS1	7
GO:0010591	regulation of lamellipodium assembly	9/1061	42/18614	0.000496924	0.0127156	0.0107168	CAPZB/DMTN/NCKAP1/FER/WASF2/CYFIP1/TWF2/AKIRIN1/DNM2	9
GO:0070493	thrombin-activated receptor signaling pathway	5/1061	13/18614	0.000521947	0.0132293	0.0111498	SNCA/F2R/PLEK/GP1BA/HPGD	5
GO:1905666	regulation of protein localization to endosome	5/1061	13/18614	0.000521947	0.0132293	0.0111498	ABHD17A/ROCK2/MSN/RDX/EGF	5
GO:0051495	positive regulation of cytoskeleton organization	23/1061	190/18614	0.000526217	0.0132436	0.0111619	MAPRE1/WASF1/CD47/GSN/CLIP1/NCK2/SNX9/NCKAP1/DSTN/TPM1/ROCK2/FER/WDR1/RHOC/KATNB1/PSRC1/WASF2/CYFIP1/PLEK/GRB2/RHOA/ARL2/WASF3	23
GO:0045216	cell-cell junction organization	25/1061	214/18614	0.000527467	0.0132436	0.0111619	IRX3/CD9/PECAM1/CTNNA1/ACTG1/PKP2/ROCK2/FER/STRN/WDR1/RHOC/F2R/TLN1/MYO1C/ADAM10/NUMB/PRKCA/RHOA/RDX/ROCK1/VCL/ARL2/TGFB1/ACTB/FLNA	25
GO:0002683	negative regulation of immune system process	46/1061	487/18614	0.000545171	0.0136095	0.0114703	A2M/NR1H2/TSPAN32/TCTA/DUSP3/IRAK3/CD47/FBXO7/TMBIM6/CNN2/WDR41/NLRX1/ANGPT1/SH2D1A/PTPRS/LTF/GPR108/SEC14L1/FER/JAK3/LOXL3/DUSP22/GPR137/TSC22D3/HLA-G/SERPING1/HLA-E/TNFSF4/CD46/ELF1/PRDX2/NDFIP1/GPR137B/SYK/CD96/BANK1/GPX1/SLA2/TWSG1/AKT1/THBS1/TGFB1/BCR/SAMSN1/DGKZ/UBASH3B	46
GO:1901880	negative regulation of protein depolymerization	12/1061	70/18614	0.000547129	0.0136095	0.0114703	GSN/CAPZB/DMTN/TAOK1/KATNB1/TMOD1/HDAC6/FLII/TWF2/TMOD3/SPTB/RDX	12
GO:0043242	negative regulation of protein-containing complex disassembly	13/1061	80/18614	0.000557064	0.0137782	0.0116125	IRAK3/GSN/CAPZB/DMTN/TAOK1/KATNB1/TMOD1/HDAC6/FLII/TWF2/TMOD3/SPTB/RDX	13
GO:0060271	cilium assembly	37/1061	367/18614	0.000559063	0.0137782	0.0116125	MAPRE1/HTT/CCDC28B/GSN/SSX2IP/EXOC5/RAB3IP/RFX3/ARF4/MPHOSPH9/CDKL1/SNAP29/ABLIM3/BBIP1/ABCC4/IFT122/DRC7/SEPTIN6/HDAC6/CEP162/RO60/CEP41/TMEM107/SEPTIN2/RILP/RFX2/CEP20/GSK3B/CDC14B/MKKS/CEP135/BBOF1/TBC1D7/TBC1D7-LOC100130357/CFAP161/FLNA/DNM2	37
GO:0071604	transforming growth factor beta production	9/1061	43/18614	0.000597083	0.0146477	0.0123453	ATF2/CD2AP/ATP6AP2/LTBP1/CD46/HIF1A/LAPTM4B/TNXB/THBS1	9
GO:0042177	negative regulation of protein catabolic process	16/1061	112/18614	0.000604128	0.0147529	0.0124339	IRAK3/PSME3IP1/SNCA/PSMF1/DEDD/CTSA/MAP1A/CST3/LAPTM4B/RILP/SIRT2/ATP13A2/ROCK1/SNX3/FLNA/GABARAPL2	16
GO:0036010	protein localization to endosome	7/1061	27/18614	0.000621505	0.0150399	0.0126758	ABHD17A/TOLLIP/PACSIN2/ROCK2/MSN/RDX/EGF	7
GO:0070861	regulation of protein exit from endoplasmic reticulum	7/1061	27/18614	0.000621505	0.0150399	0.0126758	BCAP31/UBE2J1/UBE2G2/OS9/UBAC2/SAR1A/DERL2	7
GO:0006892	post-Golgi vesicle-mediated transport	15/1061	102/18614	0.000649554	0.0156478	0.0131882	SORT1/VTI1B/MYO5A/BLZF1/EXOC5/SNAP23/MACF1/LYPLA1/AP2A1/WIPI1/EPS15/RAB10/ANK3/AP3S1/DNM2	15
GO:0043280	positive regulation of cysteine-type endopeptidase activity involved in apoptotic process	17/1061	124/18614	0.000670288	0.0160749	0.0135481	BCAP31/GSN/CASP9/SNCA/CYCS/ANP32B/MAP3K5/VCP/F2R/UACA/PRR7/DAP/SYK/P2RX1/RHOA/ATP2A3/SENP1	17
GO:0031669	cellular response to nutrient levels	26/1061	230/18614	0.000681046	0.0161584	0.0136185	ATF2/CBL/WDR45B/USP33/GAS2L1/VPS41/NPRL3/IGF1R/USF2/WDR45/MAP3K5/TNRC6A/RALB/MAPK3/MAPKAP1/COMT/GLUL/DAP/WIPI1/EIF4G1/ATG7/LAMP2/SREBF2/GABARAPL2/MAX/NFE2L2	26
GO:0032387	negative regulation of intracellular transport	11/1061	62/18614	0.000682833	0.0161584	0.0136185	GDI1/UBE2J1/DMTN/ANGPT1/UBE2G2/OS9/INPP5K/UBAC2/DERL2/CD36/SNX3	11
GO:0090303	positive regulation of wound healing	11/1061	62/18614	0.000682833	0.0161584	0.0136185	DMTN/HPSE/ACTG1/F2R/ANO6/TBXA2R/PRDX2/ITGB1/THBS1/CD36/NFE2L2	11
GO:0007009	plasma membrane organization	21/1061	170/18614	0.000691548	0.0162925	0.0137316	GSN/CD9/STX4/SNX9/ATP2A2/PACSIN2/CHMP6/ANO6/CLU/CHMP5/CLPTM1L/SH3TC2/CAVIN2/SMPD1/BIN2/FLOT1/AKT1/ANK3/ATG9A/MYH9/DNM2	21
GO:0010921	regulation of phosphatase activity	13/1061	82/18614	0.000709855	0.0165109	0.0139156	HTT/ROCK2/PTPA/PLEK/ITGA2/GSK3B/PPP6R1/PPP6R3/CALM3/ROCK1/GNAI2/GNA12/SEMA4D	13
GO:1901184	regulation of ERBB signaling pathway	13/1061	82/18614	0.000709855	0.0165109	0.0139156	DUSP3/CBL/CHMP6/FER/RTN4/PTPN12/RALB/LGMN/DGKD/SH3TC2/SHKBP1/EGF/SNX5	13
GO:0099518	vesicle cytoskeletal trafficking	12/1061	72/18614	0.000711594	0.0165109	0.0139156	HTT/KIFAP3/MYO5A/FBXW11/TRAK2/STK11/MYO1C/AP3M1/AP3B1/SNAPIN/AP3S1/DYNC1I1	12
GO:0030835	negative regulation of actin filament depolymerization	9/1061	44/18614	0.000713165	0.0165109	0.0139156	GSN/CAPZB/DMTN/TMOD1/FLII/TWF2/TMOD3/SPTB/RDX	9
GO:0150115	cell-substrate junction organization	15/1061	103/18614	0.000721023	0.0165895	0.0139819	DUSP3/MACF1/SLC9A1/PTPRA/DMTN/ACTG1/ROCK2/DUSP22/TLN1/ITGA2/RHOA/THBS1/ROCK1/VCL/BCR	15
GO:0045936	negative regulation of phosphate metabolic process	42/1061	439/18614	0.000722768	0.0165895	0.0139819	DUSP3/CBL/KAT2B/GRB10/IRAK3/FBXO7/CDKN2D/SNCA/NCK2/DMTN/ANGPT1/FKBP8/CHMP6/ROCK2/PTPA/ANKLE2/DUSP22/ARPP19/INPP5K/YWHAE/STAT3/PLEK/GNAQ/SMPD1/SIRT2/GSK3B/EIF4G1/RB1/NCOR1/PRKAR2B/AKT1/CALM3/ROCK1/GNAI2/SH2B3/CTDSPL/CD109/TGFB1/SAMSN1/SEMA4D/UBASH3B/PDE4D	42
GO:0001952	regulation of cell-matrix adhesion	17/1061	125/18614	0.000735496	0.0167508	0.0141178	DUSP3/MACF1/SLC9A1/PTPRA/DMTN/ACTG1/ROCK2/GFUS/DUSP22/TLN1/GSK3B/RHOA/THBS1/MINK1/ROCK1/VCL/CD36	17
GO:0007173	epidermal growth factor receptor signaling pathway	16/1061	114/18614	0.000736058	0.0167508	0.0141178	DUSP3/CBL/REPS2/NCK2/CHMP6/FER/PTPN12/PTPN11/RALB/DGKD/GRB2/SHKBP1/AKT1/TGFB1/EGF/SNX5	16
GO:0010950	positive regulation of endopeptidase activity	21/1061	171/18614	0.000747045	0.0169248	0.0142644	BCAP31/GSN/CASP9/SNCA/CYCS/ANP32B/ROCK2/MAP3K5/VCP/F2R/AKIRIN2/LGMN/STAT3/UACA/PRR7/DAP/SYK/P2RX1/RHOA/ATP2A3/SENP1	21
GO:1902115	regulation of organelle assembly	24/1061	207/18614	0.000752378	0.0169248	0.0142644	HTT/KAT2B/GSN/RAB3GAP2/NBDY/MPHOSPH9/CDKL1/PTPRS/CHMP6/WDR45/MSN/RALB/CHMP5/MDM1/GSK3B/STX18/WIPI1/RHOA/CEP135/RDX/TBC1D7/TBC1D7-LOC100130357/SENP6/DNM2	24
GO:0000209	protein polyubiquitination	27/1061	244/18614	0.000754441	0.0169248	0.0142644	CDC34/CBL/FBXW11/UBE3B/SHARPIN/RNF14/CDC16/TRIP12/UBE2J1/BIRC2/RNF216/UBE2E3/UBE2C/UBE2G2/MKRN1/HDAC6/ANAPC5/DDA1/TRIM38/UBE4B/UBE2Q1/RNF6/AMFR/RNF168/RBCK1/WSB2/RNF40	27
GO:0010563	negative regulation of phosphorus metabolic process	42/1061	440/18614	0.000756361	0.0169248	0.0142644	DUSP3/CBL/KAT2B/GRB10/IRAK3/FBXO7/CDKN2D/SNCA/NCK2/DMTN/ANGPT1/FKBP8/CHMP6/ROCK2/PTPA/ANKLE2/DUSP22/ARPP19/INPP5K/YWHAE/STAT3/PLEK/GNAQ/SMPD1/SIRT2/GSK3B/EIF4G1/RB1/NCOR1/PRKAR2B/AKT1/CALM3/ROCK1/GNAI2/SH2B3/CTDSPL/CD109/TGFB1/SAMSN1/SEMA4D/UBASH3B/PDE4D	42
GO:0042541	hemoglobin biosynthetic process	5/1061	14/18614	0.00077396	0.0172464	0.0145355	ABCB10/ALAS2/FECH/SLC25A37/HIF1A	5
GO:1903829	positive regulation of protein localization	44/1061	468/18614	0.000783967	0.0173969	0.0146624	BCAP31/NR1H2/ABHD17A/PTP4A3/ZDHHC2/STX4/MAVS/PECAM1/CD2AP/ACSL4/ANP32B/VPS28/ROCK2/ABLIM3/MSN/BAP1/RTN4/STK11/MAP1A/YWHAE/MYO1C/PGRMC1/PRKCB/HIF1A/STOM/GLUL/ITGB1/SAR1A/GSK3B/GPR137B/ATP13A2/OAZ1/AKT1/CEP135/ANK3/RDX/ABAT/KIF20B/TGFB1/MFF/EGF/SREBF2/FLNA/MPC2	44
GO:0042759	long-chain fatty acid biosynthetic process	7/1061	28/18614	0.000788304	0.0174209	0.0146826	QKI/GSTM4/ACSBG1/GSTM1/ALOX12/GPX4/ACOT7	7
GO:0051651	maintenance of location in cell	26/1061	233/18614	0.000826744	0.0181952	0.0153351	HTT/TPCN1/PLCB4/GSN/RYR2/SNCA/PLCH1/GPAA1/GSTO1/F2R/ARHGAP21/OS9/HTR2A/TWF2/GP1BA/AKT1/ANK3/DIAPH1/GP9/CALM3/ARL2/RASA3/FLNA/UBASH3B/DBN1/PDE4D	26
GO:0051452	intracellular pH reduction	10/1061	54/18614	0.000837403	0.0182793	0.0154061	TMEM9/ATP6V0A1/ATP6AP2/CLCN3/CLIC4/ATP6V1B2/ATP6AP1/ATP6V0E1/SNAPIN/ATP6V1A	10
GO:1902743	regulation of lamellipodium organization	10/1061	54/18614	0.000837403	0.0182793	0.0154061	CAPZB/DMTN/NCKAP1/FER/WASF2/CYFIP1/TWF2/CORO1B/AKIRIN1/DNM2	10
GO:0006623	protein targeting to vacuole	9/1061	45/18614	0.000847006	0.0184138	0.0155194	SORT1/VPS41/CLU/VPS8/NCOA4/AP3M1/LAMP2/AP3B1/PXK	9
GO:0051017	actin filament bundle assembly	20/1061	161/18614	0.000854497	0.0184268	0.0155304	CD47/SLC9A1/DMTN/ACTG1/TPM1/ROCK2/ARRB1/RHOC/INPP5K/WASF2/PLEK/ZYX/ITGB5/CORO1B/PLS3/MKKS/RHOA/RDX/ROCK1/FLNA	20
GO:1902850	microtubule cytoskeleton organization involved in mitosis	20/1061	161/18614	0.000854497	0.0184268	0.0155304	MAPRE1/SETD2/HTT/FBXW11/TUBG1/LSM14A/CHMP6/PTPA/VCP/GOLGA2/PSRC1/CHMP5/ITGB1/RHOA/EFHC1/RMDN1/STAG2/ZNF207/TUBG2/FLNA	20
GO:0007042	lysosomal lumen acidification	6/1061	21/18614	0.000874805	0.018789	0.0158356	TMEM9/ATP6V0A1/ATP6AP2/ATP6AP1/SNAPIN/ATP6V1A	6
GO:0010761	fibroblast migration	10/1061	55/18614	0.000972055	0.0207942	0.0175256	DMTN/FER/ITGB1/FUT8/AKT1/THBS1/TNS1/APPL2/GNA12/TGFB1	10
GO:0035305	negative regulation of dephosphorylation	9/1061	46/18614	0.00100056	0.0213188	0.0179677	ROCK2/PTPA/ARPP19/INPP5K/YWHAE/GSK3B/ROCK1/GNAI2/SEMA4D	9
GO:0030837	negative regulation of actin filament polymerization	11/1061	65/18614	0.00102895	0.0218365	0.0184041	GSN/CAPZB/DMTN/TMOD1/FLII/TWF2/MKKS/TMOD3/SPTB/RDX/SSH1	11
GO:0006631	fatty acid metabolic process	38/1061	394/18614	0.00109218	0.023087	0.019458	NR1H2/DCAF5/TBXAS1/SNCA/SLC27A4/LYPLA1/QKI/MGLL/ACSL4/FADS2/GSTM4/ACSBG1/ACSM3/ACSL1/SCP2/GSTM1/TNXB/PLA2G4A/HACD4/LYPLA2/GPX1/NCOR1/PRKAR2B/ALOX12/AKT1/CRYL1/GPX4/ELOVL7/CRAT/APPL2/CD36/ACOT8/PTGS1/HACL1/ACOT7/HPGD/ASAH1/ETFA	38
GO:2001233	regulation of apoptotic signaling pathway	37/1061	381/18614	0.00111471	0.0234704	0.0197812	PTTG1IP/HTT/BCAP31/STRADB/YBX3/TRAF7/STX4/CDKN2D/TMBIM6/USP47/SEPTIN4/CTNNA1/NCK2/GCLM/ENO1/P4HB/RAF1/ZMYND11/CLU/HIF1A/PRDX2/GSK3B/GPX1/TMBIM1/RB1/AKT1/PPIF/THBS1/FBH1/SGMS1/GNAI2/RBCK1/ING5/UBB/STK3/VDAC2/NFE2L2	37
GO:0046390	ribose phosphate biosynthetic process	26/1061	238/18614	0.00113015	0.0237021	0.0199764	SNCA/PAPSS1/PYGL/DIP2A/ENO1/NDUFA5/ACSL4/ACSS2/G6PD/GUCY1B1/ACSBG1/VCP/NME4/ACSL1/DMAC2L/ADCY3/SLC25A1/PAPSS2/ELOVL7/NDUFS5/DCAKD/TGFB1/IMPDH1/ACOT7/CMPK1/ATP6V1A	26
GO:0051209	release of sequestered calcium ion into cytosol	17/1061	130/18614	0.00114902	0.0240037	0.0202306	HTT/TPCN1/PLCB4/RYR2/SNCA/PLCH1/GSTO1/F2R/HTR2A/GP1BA/DIAPH1/GP9/CALM3/RASA3/FLNA/UBASH3B/PDE4D	17
GO:0061572	actin filament bundle organization	20/1061	165/18614	0.00116182	0.024095	0.0203076	CD47/SLC9A1/DMTN/ACTG1/TPM1/ROCK2/ARRB1/RHOC/INPP5K/WASF2/PLEK/ZYX/ITGB5/CORO1B/PLS3/MKKS/RHOA/RDX/ROCK1/FLNA	20
GO:0007163	establishment or maintenance of cell polarity	25/1061	226/18614	0.00116743	0.024095	0.0203076	MAPRE1/HTT/WWC1/GSN/FBXW11/SLC9A1/ARF4/CTNNA1/IGF1R/ROCK2/MSN/PARVB/WDR1/STK11/CAP1/ITGB1/GSK3B/SPINT2/RAB10/RHOA/CLIC4/ROCK1/KIF20B/ACTB/MYH9	25
GO:0006903	vesicle targeting	11/1061	66/18614	0.00117229	0.024095	0.0203076	STARD3NL/EXOC5/SNAP23/MAP4K2/SNAP29/SAR1A/TRAPPC1/WIPI1/TBC1D23/PPP6C/STARD3	11
GO:0006949	syncytium formation	11/1061	66/18614	0.00117229	0.024095	0.0203076	DOCK5/TCTA/CD9/ERCC1/CCNG1/PLEKHO1/ITGB1/FLOT1/CD109/MYH9/CAPN2	11
GO:0071985	multivesicular body sorting pathway	9/1061	47/18614	0.00117592	0.024095	0.0203076	SORT1/UBXN6/VPS28/CHMP6/VCP/VTA1/CHMP5/LAPTM4B/RILP	9
GO:0010959	regulation of metal ion transport	40/1061	423/18614	0.00119238	0.0243392	0.0205134	HTT/CD63/YWHAH/RYR2/SNCA/TMBIM6/SLC9A1/STK39/HOMER2/GSTO1/G6PD/PKP2/JAK3/F2R/ANO6/INPP5K/YWHAE/HTR2A/STOM/ITGB1/TSPAN13/SESTD1/KLHL24/CAMK2G/P2RX1/RHOA/AKT1/ANK3/DIAPH1/ATP1B1/CALM3/GNAI2/GNB5/EGF/SCN1B/FHL1/FLNA/UBASH3B/DNM2/PDE4D	40
GO:0044782	cilium organization	38/1061	396/18614	0.00119808	0.0243443	0.0205178	MAPRE1/HTT/KIFAP3/CCDC28B/GSN/SSX2IP/EXOC5/RAB3IP/RFX3/ARF4/MPHOSPH9/CDKL1/SNAP29/ABLIM3/BBIP1/ABCC4/IFT122/DRC7/SEPTIN6/HDAC6/CEP162/RO60/CEP41/TMEM107/SEPTIN2/RILP/RFX2/CEP20/GSK3B/CDC14B/MKKS/CEP135/BBOF1/TBC1D7/TBC1D7-LOC100130357/CFAP161/FLNA/DNM2	38
GO:2001056	positive regulation of cysteine-type endopeptidase activity	18/1061	142/18614	0.00120174	0.0243443	0.0205178	BCAP31/GSN/CASP9/SNCA/CYCS/ANP32B/MAP3K5/VCP/F2R/LGMN/UACA/PRR7/DAP/SYK/P2RX1/RHOA/ATP2A3/SENP1	18
GO:0030048	actin filament-based movement	17/1061	131/18614	0.00125189	0.0251696	0.0212133	GSN/MYO5A/RYR2/SLC9A1/ATP2A2/PKP2/TPM1/WIPF1/WASF2/MYO1C/CCDC88C/MYL6B/ROCK1/SCN1B/MYH9/FLNA/PDE4D	17
GO:0051283	negative regulation of sequestering of calcium ion	17/1061	131/18614	0.00125189	0.0251696	0.0212133	HTT/TPCN1/PLCB4/RYR2/SNCA/PLCH1/GSTO1/F2R/HTR2A/GP1BA/DIAPH1/GP9/CALM3/RASA3/FLNA/UBASH3B/PDE4D	17
GO:0006749	glutathione metabolic process	10/1061	57/18614	0.00129465	0.0258351	0.0217741	GCLM/GSTO1/G6PD/GSTM4/GSTM1/GPX1/GPX4/CTNS/GSR/NFE2L2	10
GO:0043666	regulation of phosphoprotein phosphatase activity	10/1061	57/18614	0.00129465	0.0258351	0.0217741	HTT/ROCK2/PTPA/GSK3B/PPP6R1/PPP6R3/CALM3/ROCK1/GNAI2/GNA12	10
GO:1902600	proton transmembrane transport	18/1061	143/18614	0.00130332	0.0259113	0.0218384	SLC9A1/ATP6V0A1/TMCO3/NDUFA4/ATP6AP2/ATP6V1G1/DMAC2L/CLCN3/PPIF/ATP6V1B2/ATP6V1E1/ATP1B1/ATP6AP1/UQCRH/CTNS/ATP6V0E1/COX17/ATP6V1A	18
GO:0045055	regulated exocytosis	25/1061	228/18614	0.00132238	0.0261928	0.0220757	CBL/STX4/SNCA/SNAP23/DMTN/ATP2A2/SNAP29/SLC18A2/FER/ABCC4/NAPA/STXBP2/PLEK/PRKCB/RAB11B/SYK/RAB10/STX1A/P2RX1/CALM3/GNAI2/UNC13D/BCR/MYH9/SNAPIN	25
GO:0019932	second-messenger-mediated signaling	30/1061	292/18614	0.00132973	0.0262413	0.0221165	HTT/IRAG1/BCAP31/CDC34/SAMD14/NFAT5/RYR2/PDE2A/SLC9A1/DMTN/ATP2A2/HOMER2/GSTO1/GUCY1B1/P2RY12/INPP5A/PLEK/CAP1/TBXA2R/SELP/NFATC1/GSK3B/SYK/SLA2/THBS1/ATP1B1/CALM3/CD36/MCTP1/PDE4D	30
GO:1902904	negative regulation of supramolecular fiber organization	20/1061	167/18614	0.00134804	0.0265049	0.0223387	MAPRE1/GSN/CAPZB/SNCA/DMTN/TAOK1/KATNB1/INPP5K/TMOD1/HDAC6/WASF2/CLU/FLII/TWF2/CORO1B/MKKS/TMOD3/SPTB/RDX/SSH1	20
GO:0007041	lysosomal transport	17/1061	132/18614	0.00136246	0.0266903	0.022495	SORT1/UBXN6/VPS41/CHMP6/VCP/CLU/CHMP5/RILP/NCOA4/ATP13A2/PSAP/AP3M1/SCYL2/LAMP2/AP3B1/SNAPIN/PXK	17
GO:0032527	protein exit from endoplasmic reticulum	9/1061	48/18614	0.00137527	0.0268428	0.0226235	BCAP31/UBE2J1/UBE2G2/VCP/OS9/UBAC2/SAR1A/DERL2/SEL1L	9
GO:0070997	neuron death	36/1061	373/18614	0.00143893	0.0279832	0.0235846	STAMBP/CDC34/ATF2/HDGF/CBL/CASP9/FBXO7/SNCA/TMBIM6/SLC9A1/GCLM/IKBKG/ANGPT1/G6PD/GAPDH/CLN8/INPP5A/MAP3K5/F2R/LGMN/HDAC6/CLU/APP/HIF1A/UBE2M/GSK3B/ATP13A2/GPX1/EIF4G1/RB1/RHOA/AKT1/ROCK1/UBB/MAX/CAPN2	36
GO:0006816	calcium ion transport	42/1061	455/18614	0.00145437	0.0281811	0.0237514	HTT/TPCN1/PLCB4/RYR2/SNCA/TMBIM6/SLC9A1/PLCH1/ATP2A2/SLC24A3/HOMER2/GSTO1/G6PD/JAK3/F2R/ANO6/INPP5K/YWHAE/HTR2A/PRKCB/SLC35G1/TSPAN13/MCUR1/SESTD1/GP1BA/CAMK2G/P2RX1/RHOA/ATP2A3/DIAPH1/ATP1B1/GP9/CALM3/GNAI2/GNB5/MICU1/CATSPER1/EGF/RASA3/FLNA/UBASH3B/PDE4D	42
GO:0008088	axo-dendritic transport	12/1061	78/18614	0.00147053	0.0282854	0.0238393	WASF1/FBXW11/ARMCX3/TRAK2/MAP1A/HDAC6/APP/HIF1A/AP3M1/AP3B1/SNAPIN/AP3S1	12
GO:0007039	protein catabolic process in the vacuole	6/1061	23/18614	0.00147562	0.0282854	0.0238393	MARCHF2/LAPTM4B/ATP13A2/DPP7/TPP1/LAMP2	6
GO:0035493	SNARE complex assembly	6/1061	23/18614	0.00147562	0.0282854	0.0238393	STX4/SNCA/VPS41/VPS8/STX1A/VAMP4	6
GO:0051282	regulation of sequestering of calcium ion	17/1061	133/18614	0.00148118	0.0282905	0.0238436	HTT/TPCN1/PLCB4/RYR2/SNCA/PLCH1/GSTO1/F2R/HTR2A/GP1BA/DIAPH1/GP9/CALM3/RASA3/FLNA/UBASH3B/PDE4D	17
GO:0035335	peptidyl-tyrosine dephosphorylation	7/1061	31/18614	0.00150755	0.0286065	0.0241099	DUSP3/PTPRS/PTPN12/PTPN11/DUSP22/PTPRF/UBASH3B	7
GO:0016925	protein sumoylation	11/1061	68/18614	0.00150842	0.0286065	0.0241099	SENP2/HMG20B/TOLLIP/TRIM38/KIAA1586/ZMIZ2/SUMO3/STX1A/SENP1/SLF1/SENP6	11
GO:0051014	actin filament severing	5/1061	16/18614	0.00153478	0.0289015	0.0243586	GSN/DSTN/CFL1/FLII/MYH9	5
GO:0061684	chaperone-mediated autophagy	5/1061	16/18614	0.00153478	0.0289015	0.0243586	SNCA/CTSA/CLU/ATP13A2/LAMP2	5
GO:0007043	cell-cell junction assembly	19/1061	157/18614	0.00155328	0.0291472	0.0245657	IRX3/CD9/PECAM1/CTNNA1/ACTG1/PKP2/ROCK2/FER/STRN/WDR1/RHOC/TLN1/MYO1C/PRKCA/RHOA/ROCK1/VCL/ARL2/ACTB	19
GO:0006911	phagocytosis, engulfment	9/1061	49/18614	0.00160093	0.0299363	0.0252307	GSN/ANO6/ITGA2/CLCN3/BIN2/THBS1/APPL2/CD36/MYH9	9
GO:0051224	negative regulation of protein transport	17/1061	134/18614	0.0016085	0.029973	0.0252617	GDI1/LYPLA1/UBE2J1/DMTN/ANGPT1/UBE2G2/PTPN11/F2R/OS9/INPP5K/PFKL/UBAC2/NDFIP1/DERL2/GNAZ/CD36/SNX3	17
GO:0010762	regulation of fibroblast migration	8/1061	40/18614	0.00163117	0.0300914	0.0253615	DMTN/FER/ITGB1/AKT1/THBS1/APPL2/GNA12/TGFB1	8
GO:0032506	cytokinetic process	8/1061	40/18614	0.00163117	0.0300914	0.0253615	SNX9/CHMP6/ARF1/CHMP5/ANXA11/RHOA/KIF20B/MYH9	8
GO:0061136	regulation of proteasomal protein catabolic process	22/1061	194/18614	0.00163173	0.0300914	0.0253615	BCAP31/PSME3IP1/RNF14/RCHY1/PSMF1/VCP/ZFAND2A/MAP1A/CLU/DDA1/SIRT2/GSK3B/ARAF/GPX1/CDK2/AKT1/PSMC5/GNA12/RNF40/UBB/GABARAPL2/NFE2L2	22
GO:0010508	positive regulation of autophagy	18/1061	146/18614	0.00165285	0.0302836	0.0255234	HTT/TPCN1/FBXO7/RAB3GAP2/NPRL3/IKBKG/CCNY/WDR45/RALB/STK11/MAPK3/HIF1A/TRIM38/GSK3B/WIPI1/CDK16/ROCK1/LARP1	18
GO:0001820	serotonin secretion	4/1061	10/18614	0.00167047	0.0302836	0.0255234	MAOB/SLC18A2/SYK/P2RX1	4
GO:0015911	long-chain fatty acid import across plasma membrane	4/1061	10/18614	0.00167047	0.0302836	0.0255234	ACSL1/AKT1/THBS1/CD36	4
GO:0019372	lipoxygenase pathway	4/1061	10/18614	0.00167047	0.0302836	0.0255234	GPX1/ALOX12/GPX4/HPGD	4
GO:0031848	protection from non-homologous end joining at telomere	4/1061	10/18614	0.00167047	0.0302836	0.0255234	ERCC1/DCLRE1A/ACD/XRCC1	4
GO:0022604	regulation of cell morphogenesis	26/1061	245/18614	0.0017142	0.0309714	0.0261031	PARP6/CAPZB/MACF1/PLEKHO1/DMTN/TPM1/MSN/PARVB/WDR1/CFL1/HDAC6/CYFIP1/CUX1/MKLN1/CORO1B/CPNE5/MPL/DIAPH1/SPARC/RDX/ARHGAP18/GNA12/WASF3/MYH9/SEMA4D/DBN1	26
GO:0007040	lysosome organization	14/1061	101/18614	0.00173975	0.0311207	0.0262289	TMEM9/ACP2/ATP6V0A1/CHMP6/CLN8/LAMTOR1/ATP6AP2/CHMP5/LAPTM4B/ATP6AP1/TPP1/AP3B1/SNAPIN/ATP6V1A	14
GO:0080171	lytic vacuole organization	14/1061	101/18614	0.00173975	0.0311207	0.0262289	TMEM9/ACP2/ATP6V0A1/CHMP6/CLN8/LAMTOR1/ATP6AP2/CHMP5/LAPTM4B/ATP6AP1/TPP1/AP3B1/SNAPIN/ATP6V1A	14
GO:0090150	establishment of protein localization to membrane	28/1061	271/18614	0.00173992	0.0311207	0.0262289	RAB3GAP2/ZDHHC2/GDI1/BLZF1/RAB3IP/MACF1/LYPLA1/DMTN/ZFAND2B/CCDC47/INPP5K/MYO1C/STOM/ZDHHC4/RAB11B/RAB10/ANK3/UBL4A/ATP1B1/YIF1B/ATP6AP1/RDX/SRPRA/CALM3/SSR1/TRAM1/MFF/AP3B1	28
GO:2001234	negative regulation of apoptotic signaling pathway	25/1061	233/18614	0.00178931	0.0318974	0.0268836	PTTG1IP/HTT/STRADB/YBX3/CDKN2D/TMBIM6/USP47/CTNNA1/GCLM/ENO1/RAF1/ZMYND11/CLU/HIF1A/PRDX2/GSK3B/GPX1/TMBIM1/RB1/AKT1/PPIF/THBS1/GNAI2/VDAC2/NFE2L2	25
GO:0006622	protein targeting to lysosome	7/1061	32/18614	0.00183603	0.0322278	0.027162	SORT1/CLU/NCOA4/AP3M1/LAMP2/AP3B1/PXK	7
GO:0010765	positive regulation of sodium ion transport	7/1061	32/18614	0.00183603	0.0322278	0.027162	SLC9A1/PKP2/AKT1/ANK3/ATP1B1/SCN1B/DNM2	7
GO:0035308	negative regulation of protein dephosphorylation	7/1061	32/18614	0.00183603	0.0322278	0.027162	ROCK2/PTPA/ARPP19/YWHAE/GSK3B/ROCK1/GNAI2	7
GO:0032868	response to insulin	28/1061	272/18614	0.00183717	0.0322278	0.027162	SORT1/KAT2B/GRB10/MYO5A/SLC27A4/SLC9A1/PTPRA/IGF1R/FER/PTPN11/RAF1/MAPK3/INPP5K/MYO1C/CYFIP1/PRKCB/SH2B2/GRB2/GSK3B/RAB10/RB1/AKT1/APPL2/CCND3/GNAI2/AP3S1/SNX5/MAX	28
GO:0140056	organelle localization by membrane tethering	12/1061	80/18614	0.00183797	0.0322278	0.027162	VTI1B/PACS2/STX4/EXOC5/RAB3IP/ATP2A2/SNAP29/RALB/STXBP2/VAPB/PLEK/STX1A	12
GO:0030195	negative regulation of blood coagulation	9/1061	50/18614	0.00185534	0.0324261	0.0273291	CD9/SERPING1/PROS1/GP1BA/ALOX12/THBS1/SH2B3/ABAT/UBASH3B	9
GO:0140014	mitotic nuclear division	29/1061	286/18614	0.00193347	0.0336814	0.0283872	MAPRE1/KAT2B/TUBG1/TOM1L1/LSM14A/CDC16/FBXW5/CHMP6/UBE2C/ANKLE2/GOLGA2/KATNB1/TOM1L2/PSRC1/CHMP5/ANAPC5/CENPK/SIRT2/CDC14B/RB1/RHOA/RMDN1/STAG2/SLF1/KIF20B/ZNF207/EGF/TUBG2/FLNA	29
GO:0010810	regulation of cell-substrate adhesion	24/1061	222/18614	0.00197669	0.0343225	0.0289275	DOCK5/DUSP3/MACF1/SLC9A1/PTPRA/DMTN/ACTG1/P4HB/PKP2/ROCK2/GFUS/DUSP22/TLN1/GSK3B/RHOA/THBS1/MINK1/ROCK1/VCL/CD36/UNC13D/ARL2/FLNA/DNM2	24
GO:0010952	positive regulation of peptidase activity	21/1061	185/18614	0.00203241	0.0349744	0.0294769	BCAP31/GSN/CASP9/SNCA/CYCS/ANP32B/ROCK2/MAP3K5/VCP/F2R/AKIRIN2/LGMN/STAT3/UACA/PRR7/DAP/SYK/P2RX1/RHOA/ATP2A3/SENP1	21
GO:0008277	regulation of G protein-coupled receptor signaling pathway	17/1061	137/18614	0.00204708	0.0349744	0.0294769	GRK3/SNCA/USP33/HOMER2/MGLL/GRK6/ROCK2/ARRB1/GRK5/RGS6/PLEK/RGS9/PRKCA/ROCK1/GNAI2/GRK4/DNM2	17
GO:0051208	sequestering of calcium ion	17/1061	137/18614	0.00204708	0.0349744	0.0294769	HTT/TPCN1/PLCB4/RYR2/SNCA/PLCH1/GSTO1/F2R/HTR2A/GP1BA/DIAPH1/GP9/CALM3/RASA3/FLNA/UBASH3B/PDE4D	17
GO:0046474	glycerophospholipid biosynthetic process	23/1061	210/18614	0.00205012	0.0349744	0.0294769	SLC30A5/PIGB/HYCC2/DHRS7B/GPAA1/SLC44A1/TTC7B/SLC44A2/INPP5K/IMPA2/DGKG/HTR2A/DGKD/CDIPT/PLA2G4A/SLA2/CDS2/PGS1/DPM2/MTMR2/DGKZ/PTDSS2/CAPN2	23
GO:2001242	regulation of intrinsic apoptotic signaling pathway	20/1061	173/18614	0.00206651	0.0349744	0.0294769	PTTG1IP/BCAP31/YBX3/CDKN2D/TMBIM6/USP47/SEPTIN4/NCK2/ENO1/P4HB/CLU/HIF1A/GPX1/AKT1/PPIF/FBH1/SGMS1/UBB/VDAC2/NFE2L2	20
GO:0010763	positive regulation of fibroblast migration	5/1061	17/18614	0.00207309	0.0349744	0.0294769	DMTN/ITGB1/AKT1/THBS1/TGFB1	5
GO:0034112	positive regulation of homotypic cell-cell adhesion	5/1061	17/18614	0.00207309	0.0349744	0.0294769	MFSD2B/MMRN1/GP6/DMTN/ANK3	5
GO:0046838	phosphorylated carbohydrate dephosphorylation	5/1061	17/18614	0.00207309	0.0349744	0.0294769	INPP5A/INPP5K/IMPA2/INPP5B/MTMR2	5
GO:0046855	inositol phosphate dephosphorylation	5/1061	17/18614	0.00207309	0.0349744	0.0294769	INPP5A/INPP5K/IMPA2/INPP5B/MTMR2	5
GO:1900047	negative regulation of hemostasis	9/1061	51/18614	0.00214105	0.0360074	0.0303475	CD9/SERPING1/PROS1/GP1BA/ALOX12/THBS1/SH2B3/ABAT/UBASH3B	9
GO:1904950	negative regulation of establishment of protein localization	17/1061	138/18614	0.00221388	0.0371154	0.0312813	GDI1/LYPLA1/UBE2J1/DMTN/ANGPT1/UBE2G2/PTPN11/F2R/OS9/INPP5K/PFKL/UBAC2/NDFIP1/DERL2/GNAZ/CD36/SNX3	17
GO:0072593	reactive oxygen species metabolic process	25/1061	237/18614	0.00225839	0.0377433	0.0318106	HBD/MAOB/SNCA/ARF4/BIRC2/G6PD/SLC18A2/HDAC6/HIF1A/PRDX2/HBB/CLCN3/GRB2/SIRT2/SYK/GPX1/RHOA/ALOX12/THBS1/GNAI2/CD36/CTNS/TGFB1/BCR/NFE2L2	25
GO:0003012	muscle system process	41/1061	452/18614	0.00227075	0.0378317	0.0318851	DOCK5/MEF2A/GSN/RYR2/SLC9A1/MYL9/TPM4/ENO1/ATP2A2/GSTO1/G6PD/TPM3/PKP2/TPM1/ROCK2/SMTN/F2R/TMOD1/HTR2A/TBXA2R/TPM2/ITGA2/SPX/MYL6B/PRKCA/MYOM2/MKKS/TMOD3/CAMK2G/P2RX1/RHOA/GAMT/ATP1B1/RAP1GDS1/CALM3/ROCK1/ABAT/GNAO1/SCN1B/FLNA/PDE4D	41
GO:0099111	microtubule-based transport	23/1061	212/18614	0.00231745	0.0384102	0.0323727	HTT/WASF1/KIFAP3/FBXW11/SSX2IP/RFX3/ARMCX3/TRAK2/KXD1/RAB6A/IFT122/STK11/ARHGAP21/MAP1A/HDAC6/APP/HIF1A/AP3M1/UBB/AP3B1/SNAPIN/AP3S1/DYNC1I1	23
GO:1903035	negative regulation of response to wounding	13/1061	93/18614	0.00231984	0.0384102	0.0323727	CD9/MMRN1/PTPRS/SERPING1/PROS1/GP1BA/ALOX12/THBS1/SH2B3/ABAT/CD109/CERS2/UBASH3B	13
GO:0050860	negative regulation of T cell receptor signaling pathway	6/1061	25/18614	0.00234794	0.0385178	0.0324633	DUSP3/SH2D1A/DUSP22/ELF1/SLA2/DGKZ	6
GO:0070841	inclusion body assembly	6/1061	25/18614	0.00234794	0.0385178	0.0324633	CDC34/VCP/HDAC6/CLU/PSMC5/DNAJB6	6
GO:0086064	cell communication by electrical coupling involved in cardiac conduction	6/1061	25/18614	0.00234794	0.0385178	0.0324633	IRX3/RYR2/PKP2/ATP1B1/CALM3/PDE4D	6
GO:0044772	mitotic cell cycle phase transition	42/1061	467/18614	0.00236782	0.0387251	0.032638	PRMT2/CDC34/SENP2/FBXO7/GSPT1/CDKN2D/CCNG1/CDC16/USP47/CCNY/HINFP/UBE2C/TAOK1/ARPP19/BCL7B/RBBP8/APP/ANAPC5/TFDP1/SIRT2/ITGB1/CDC14B/CDK2/EIF4G1/RB1/TMOD3/AKT1/CUL4B/CDK16/APPL2/RDX/CALM3/CCND3/CTDSPL/ZNF207/ACTB/MRE11/FHL1/GFI1B/NPAT/PPP6C/DNM2	42
GO:1903322	positive regulation of protein modification by small protein conjugation or removal	17/1061	139/18614	0.00239188	0.0388563	0.0327486	PTTG1IP/SENP2/TOLLIP/RCHY1/SEPTIN4/BIRC2/ANGPT1/UBE2C/VCP/NDFIP1/CDC14B/DCUN1D1/WBP1L/RNF40/TBC1D7/TBC1D7-LOC100130357/UBB	17
GO:0001701	in utero embryonic development	37/1061	398/18614	0.00239655	0.0388563	0.0327486	SETD2/ATF2/CMTM3/SENP2/C1orf43/YBX3/MFNG/ANGPT1/COPS3/SPECC1/HINFP/GABPA/APBA2/BAP1/RTN4/SMAD2/INPP5K/RBBP8/HIF1A/ADAM10/GRB2/ITGB1/FUT8/TM4SF1/SPINT2/AKT1/SLC25A20/SUPT6H/NSRP1/INPP5B/GNA12/MYH9/STK3/DNAJB6/NPAT/DBN1/CAPN2	37
GO:0051100	negative regulation of binding	19/1061	163/18614	0.00240084	0.0388563	0.0327486	SENP2/PSME3IP1/TMBIM6/USP33/DHRS7B/ATP2A2/CTNNBIP1/RALB/GOLGA2/MAPK3/HMGA2/PTPRF/GSK3B/SUMO3/ATP2A3/AKT1/FBH1/ROCK1/ACTB	19
GO:0000082	G1/S transition of mitotic cell cycle	26/1061	251/18614	0.0024049	0.0388563	0.0327486	PRMT2/CDC34/SENP2/FBXO7/GSPT1/CDKN2D/HINFP/BCL7B/RBBP8/TFDP1/ITGB1/CDK2/EIF4G1/RB1/AKT1/CUL4B/CDK16/APPL2/RDX/CCND3/CTDSPL/ACTB/FHL1/GFI1B/NPAT/PPP6C	26
GO:0072599	establishment of protein localization to endoplasmic reticulum	9/1061	52/18614	0.00246072	0.0395373	0.0333226	RYR2/RAB3GAP2/ZFAND2A/ZFAND2B/RAB10/UBL4A/SRPRA/MAN1A1/TRAM1	9
GO:0031396	regulation of protein ubiquitination	23/1061	213/18614	0.00246184	0.0395373	0.0333226	PTTG1IP/SENP2/RCHY1/UBXN2A/TRIP12/SEPTIN4/BIRC2/ANGPT1/VPS28/ARRB1/UBE2C/PRR7/NDFIP1/CDC14B/USP4/DCUN1D1/AKT1/WBP1L/RNF40/TBC1D7/TBC1D7-LOC100130357/UBB/SVBP	23
GO:0046486	glycerolipid metabolic process	36/1061	385/18614	0.00247093	0.0395645	0.0333455	PLAAT1/SLC30A5/PIGB/NR1H2/HYCC2/ABCA3/DHRS7B/MGLL/GPAA1/SLC44A1/INPP5A/TTC7B/SLC44A2/PTPN11/INPP5K/IMPA2/DGKG/ACSL1/PLEK/HTR2A/DGKD/CDIPT/TNXB/PLA2G4A/LYPLA2/GPX1/SLA2/CDS2/INPP5B/PGS1/DPM2/SEL1L/MTMR2/DGKZ/PTDSS2/CAPN2	36
GO:0072666	establishment of protein localization to vacuole	10/1061	62/18614	0.00249293	0.0397874	0.0335333	SORT1/VPS41/VPS28/CLU/VPS8/NCOA4/AP3M1/LAMP2/AP3B1/PXK	10
GO:0051561	positive regulation of mitochondrial calcium ion concentration	4/1061	11/18614	0.00250717	0.0397874	0.0335333	BCAP31/MCUR1/RAP1GDS1/MICU1	4
GO:0071872	cellular response to epinephrine stimulus	4/1061	11/18614	0.00250717	0.0397874	0.0335333	RYR2/SNCA/SLC9A1/SIRT2	4
GO:0030433	ubiquitin-dependent ERAD pathway	12/1061	83/18614	0.00252751	0.0399915	0.0337054	BCAP31/UBE2J1/UBE2G2/VCP/OS9/CCDC47/UBE4B/DERL2/AMFR/MAN1A1/SEL1L/NFE2L2	12
GO:0016601	Rac protein signal transduction	8/1061	43/18614	0.00264434	0.0416709	0.0351209	WASF1/DOCK5/SSX2IP/NCKAP1/DBNL/WASF2/CYFIP1/DNM2	8
GO:0006891	intra-Golgi vesicle-mediated transport	7/1061	34/18614	0.00265703	0.0416709	0.0351209	VTI1B/RAB6A/NAPA/COG5/RAB6B/GABARAPL2/COPZ1	7
GO:0090313	regulation of protein targeting to membrane	7/1061	34/18614	0.00265703	0.0416709	0.0351209	GDI1/DMTN/INPP5K/MYO1C/STOM/ANK3/MFF	7
GO:1904062	regulation of monoatomic cation transmembrane transport	33/1061	346/18614	0.00268238	0.0419456	0.0353523	HTT/CD63/YWHAH/RYR2/SNCA/TMBIM6/SLC9A1/STK39/GSTO1/G6PD/NDUFA4/F2R/ANO6/YWHAE/STOM/ITGB1/TSPAN13/SESTD1/KLHL24/P2RX1/PPIF/ANK3/DIAPH1/ATP1B1/CALM3/GNB5/SCN1B/FHL1/COX17/FLNA/UBASH3B/DNM2/PDE4D	33
GO:0043462	regulation of ATP-dependent activity	11/1061	73/18614	0.0027031	0.0421463	0.0355215	RYR2/POT1/LTF/TPM1/DNAJC9/TPM2/PPIF/ATP1B1/PXK/GABARAPL2/DNM2	11
GO:0070588	calcium ion transmembrane transport	34/1061	360/18614	0.00273411	0.0421805	0.0355503	HTT/TPCN1/PLCB4/RYR2/SNCA/TMBIM6/SLC9A1/PLCH1/ATP2A2/SLC24A3/GSTO1/G6PD/F2R/ANO6/YWHAE/HTR2A/SLC35G1/TSPAN13/MCUR1/SESTD1/GP1BA/P2RX1/ATP2A3/DIAPH1/ATP1B1/GP9/CALM3/GNB5/MICU1/CATSPER1/RASA3/FLNA/UBASH3B/PDE4D	34
GO:0020027	hemoglobin metabolic process	5/1061	18/18614	0.00273706	0.0421805	0.0355503	ABCB10/ALAS2/FECH/SLC25A37/HIF1A	5
GO:0072673	lamellipodium morphogenesis	5/1061	18/18614	0.00273706	0.0421805	0.0355503	WASF1/PLEKHO1/SNX1/WASF2/CORO1B	5
GO:0099010	modification of postsynaptic structure	5/1061	18/18614	0.00273706	0.0421805	0.0355503	WASF1/CYFIP1/RHOA/SPTB/WASF3	5
GO:0045931	positive regulation of mitotic cell cycle	16/1061	129/18614	0.00274473	0.0421805	0.0355503	DUSP3/CDC16/UBE2C/PTPN11/LGMN/APP/ANAPC5/TFDP1/PRKCA/EIF4G1/RB1/TMOD3/AKT1/CUL4B/RDX/CCND3	16
GO:0007249	I-kappaB kinase/NF-kappaB signaling	29/1061	293/18614	0.00276495	0.0423694	0.0357095	TAB2/TNIP2/SHARPIN/TMEM9B/MAVS/NLRX1/BIRC2/IKBKG/ANGPT1/LTF/GAPDH/ROCK2/SLC44A2/RHOC/F2R/CARD19/ZMYND11/NKIRAS2/PRKCB/PPM1N/NDFIP1/TRIM38/RHOA/AKT1/ROCK1/CD36/RBCK1/ECM1/FLNA	29
GO:0051235	maintenance of location	33/1061	347/18614	0.00280722	0.0428942	0.0361519	HTT/NR1H2/TPCN1/PLCB4/GSN/RYR2/SNCA/PLCH1/GPAA1/GSTO1/SLC18A2/F2R/ARHGAP21/OS9/HTR2A/LTBP1/TWF2/GP1BA/AKT1/ANK3/DIAPH1/CDS2/GP9/CALM3/CD36/ARL2/RASA3/SREBF2/COX17/FLNA/UBASH3B/DBN1/PDE4D	33
GO:0010882	regulation of cardiac muscle contraction by calcium ion signaling	6/1061	26/18614	0.00290713	0.0440435	0.0371204	RYR2/SLC9A1/ATP2A2/GSTO1/ATP1B1/CALM3	6
GO:0014829	vascular associated smooth muscle contraction	6/1061	26/18614	0.00290713	0.0440435	0.0371204	DOCK5/HTR2A/MKKS/P2RX1/RHOA/RAP1GDS1	6
GO:0099563	modification of synaptic structure	6/1061	26/18614	0.00290713	0.0440435	0.0371204	WASF1/CYFIP1/PGRMC1/RHOA/SPTB/WASF3	6
GO:0050777	negative regulation of immune response	21/1061	191/18614	0.00299292	0.0452151	0.0381079	A2M/NR1H2/IRAK3/WDR41/NLRX1/FER/JAK3/LOXL3/DUSP22/HLA-G/SERPING1/HLA-E/TNFSF4/CD46/NDFIP1/SYK/CD96/GPX1/TGFB1/BCR/SAMSN1	21
GO:0045022	early endosome to late endosome transport	8/1061	44/18614	0.00307349	0.0461714	0.0389139	MSN/MAPK3/RILP/RDX/SNX3/MTMR2/PXK/FLNA	8
GO:0050856	regulation of T cell receptor signaling pathway	8/1061	44/18614	0.00307349	0.0461714	0.0389139	DUSP3/CD226/IKBKG/SH2D1A/DUSP22/ELF1/SLA2/DGKZ	8
GO:0009152	purine ribonucleotide biosynthetic process	23/1061	217/18614	0.00311802	0.0467092	0.0393671	SNCA/PAPSS1/DIP2A/ENO1/NDUFA5/ACSL4/ACSS2/GUCY1B1/ACSBG1/VCP/NME4/ACSL1/DMAC2L/ADCY3/SLC25A1/PAPSS2/ELOVL7/NDUFS5/DCAKD/TGFB1/IMPDH1/ACOT7/ATP6V1A	23
GO:0033059	cellular pigmentation	10/1061	64/18614	0.00316969	0.0473505	0.0399077	CD63/MYO5A/RAB32/RAB11B/MKKS/AP3M1/AP1B1/AP3B1/SNAPIN/AP3S1	10
GO:0090316	positive regulation of intracellular protein transport	18/1061	155/18614	0.00320877	0.0477313	0.0402286	BCAP31/ZDHHC2/MAVS/ANP32B/ABLIM3/BAP1/YWHAE/MYO1C/STOM/SAR1A/GSK3B/OAZ1/ANK3/KIF20B/TGFB1/MFF/SREBF2/FLNA	18
GO:0050819	negative regulation of coagulation	9/1061	54/18614	0.00321302	0.0477313	0.0402286	CD9/SERPING1/PROS1/GP1BA/ALOX12/THBS1/SH2B3/ABAT/UBASH3B	9
GO:0032231	regulation of actin filament bundle assembly	14/1061	108/18614	0.00328081	0.0486033	0.0409635	CD47/SLC9A1/ACTG1/TPM1/ROCK2/RHOC/INPP5K/WASF2/PLEK/MKKS/RHOA/RDX/ROCK1/FLNA	14
GO:0009260	ribonucleotide biosynthetic process	24/1061	231/18614	0.00332738	0.0488841	0.0412002	SNCA/PAPSS1/DIP2A/ENO1/NDUFA5/ACSL4/ACSS2/GUCY1B1/ACSBG1/VCP/NME4/ACSL1/DMAC2L/ADCY3/SLC25A1/PAPSS2/ELOVL7/NDUFS5/DCAKD/TGFB1/IMPDH1/ACOT7/CMPK1/ATP6V1A	24
GO:0046323	glucose import	11/1061	75/18614	0.00335567	0.0488841	0.0412002	MEF2A/SORT1/GRB10/SLC27A4/PTPN11/ARPP19/SLC2A3/RTN2/AKT1/APPL2/NFE2L2	11
GO:0006650	glycerophospholipid metabolic process	29/1061	297/18614	0.00336466	0.0488841	0.0412002	PLAAT1/SLC30A5/PIGB/NR1H2/HYCC2/ABCA3/DHRS7B/GPAA1/SLC44A1/INPP5A/TTC7B/SLC44A2/INPP5K/IMPA2/DGKG/PLEK/HTR2A/DGKD/CDIPT/PLA2G4A/SLA2/CDS2/INPP5B/PGS1/DPM2/MTMR2/DGKZ/PTDSS2/CAPN2	29
GO:0006497	protein lipidation	13/1061	97/18614	0.00337996	0.0488841	0.0412002	SLC30A5/PIGB/RAB3GAP2/ZDHHC2/WDR45B/RABL3/GPAA1/WDR45/GLUL/ZDHHC4/WIPI1/ATG7/DPM2	13
GO:0032418	lysosome localization	12/1061	86/18614	0.00341422	0.0488841	0.0412002	CBL/SNAP23/KXD1/SLC18A2/FER/LAMTOR1/HDAC6/STXBP2/SYK/UNC13D/MYH9/SNAPIN	12
GO:0034103	regulation of tissue remodeling	12/1061	86/18614	0.00341422	0.0488841	0.0412002	ROCK2/GPR137/CST3/GPR137B/SYK/PRKCA/TMBIM1/SUCO/ROCK1/TGFB1/BCR/UBASH3B	12
GO:1990849	vacuolar localization	12/1061	86/18614	0.00341422	0.0488841	0.0412002	CBL/SNAP23/KXD1/SLC18A2/FER/LAMTOR1/HDAC6/STXBP2/SYK/UNC13D/MYH9/SNAPIN	12
GO:0022407	regulation of cell-cell adhesion	43/1061	491/18614	0.00345359	0.0488841	0.0412002	KIFAP3/TSPAN32/DUSP3/CD47/MFSD2B/NFAT5/ZDHHC2/CD9/MMRN1/GP6/NCK2/IGFBP2/DMTN/JAK3/FERMT3/PTPN11/LOXL3/DUSP22/HLA-G/HLA-E/TNFSF4/CD46/SELP/PRDX2/NDFIP1/SPINT2/SYK/PRKCA/FLOT1/GP1BA/TWSG1/RHOA/ALOX12/AKT1/ANK3/MINK1/RDX/SH2B3/ABAT/TGFB1/ACTB/AP3B1/UBASH3B	43
GO:0043122	regulation of I-kappaB kinase/NF-kappaB signaling	26/1061	258/18614	0.00349779	0.0488841	0.0412002	TAB2/TNIP2/SHARPIN/TMEM9B/MAVS/NLRX1/BIRC2/IKBKG/ANGPT1/LTF/GAPDH/SLC44A2/RHOC/F2R/CARD19/ZMYND11/NKIRAS2/PRKCB/PPM1N/NDFIP1/TRIM38/RHOA/CD36/RBCK1/ECM1/FLNA	26
GO:1904951	positive regulation of establishment of protein localization	31/1061	325/18614	0.00354153	0.0488841	0.0412002	BCAP31/NR1H2/PTP4A3/ZDHHC2/STX4/MAVS/CD2AP/ACSL4/ANP32B/VPS28/ABLIM3/BAP1/YWHAE/MYO1C/PRKCB/HIF1A/STOM/GLUL/SAR1A/GSK3B/ATP13A2/OAZ1/CEP135/ANK3/ABAT/KIF20B/TGFB1/MFF/SREBF2/FLNA/MPC2	31
GO:0010544	negative regulation of platelet activation	5/1061	19/18614	0.00354226	0.0488841	0.0412002	CD9/ALOX12/SH2B3/ABAT/UBASH3B	5
GO:0010801	negative regulation of peptidyl-threonine phosphorylation	5/1061	19/18614	0.00354226	0.0488841	0.0412002	DMTN/INPP5K/SIRT2/EIF4G1/CALM3	5
GO:0016082	synaptic vesicle priming	5/1061	19/18614	0.00354226	0.0488841	0.0412002	SNCA/SNAP23/SNAP29/NAPA/STX1A	5
GO:0044804	autophagy of nucleus	5/1061	19/18614	0.00354226	0.0488841	0.0412002	WDR45B/WDR45/WIPI1/ATG9A/ATG7	5
GO:0071545	inositol phosphate catabolic process	5/1061	19/18614	0.00354226	0.0488841	0.0412002	INPP5A/INPP5K/IMPA2/INPP5B/MTMR2	5
GO:1903232	melanosome assembly	5/1061	19/18614	0.00354226	0.0488841	0.0412002	RAB32/AP3M1/AP1B1/AP3B1/AP3S1	5
GO:2000641	regulation of early endosome to late endosome transport	5/1061	19/18614	0.00354226	0.0488841	0.0412002	MSN/MAPK3/RDX/SNX3/MTMR2	5
GO:0010799	regulation of peptidyl-threonine phosphorylation	8/1061	45/18614	0.00355489	0.0488841	0.0412002	DMTN/INPP5K/APP/SIRT2/EIF4G1/CALM3/TGFB1/EGF	8
GO:0050854	regulation of antigen receptor-mediated signaling pathway	10/1061	65/18614	0.00355891	0.0488841	0.0412002	DUSP3/CMTM3/CD226/IKBKG/SH2D1A/DUSP22/PRKCB/ELF1/SLA2/DGKZ	10
GO:0098930	axonal transport	10/1061	65/18614	0.00355891	0.0488841	0.0412002	FBXW11/ARMCX3/TRAK2/MAP1A/HDAC6/HIF1A/AP3M1/AP3B1/SNAPIN/AP3S1	10
GO:0034643	establishment of mitochondrion localization, microtubule-mediated	6/1061	27/18614	0.00356017	0.0488841	0.0412002	WASF1/ARMCX3/TRAK2/HDAC6/HIF1A/UBB	6
GO:0046174	polyol catabolic process	6/1061	27/18614	0.00356017	0.0488841	0.0412002	INPP5A/INPP5K/IMPA2/GPD2/INPP5B/MTMR2	6
GO:0047497	mitochondrion transport along microtubule	6/1061	27/18614	0.00356017	0.0488841	0.0412002	WASF1/ARMCX3/TRAK2/HDAC6/HIF1A/UBB	6
GO:0030038	contractile actin filament bundle assembly	14/1061	109/18614	0.00357195	0.0488841	0.0412002	CD47/SLC9A1/ACTG1/TPM1/ROCK2/ARRB1/RHOC/INPP5K/WASF2/ZYX/ITGB5/MKKS/RHOA/ROCK1	14
GO:0036503	ERAD pathway	14/1061	109/18614	0.00357195	0.0488841	0.0412002	BCAP31/UBXN6/UBE2J1/UBE2G2/VCP/OS9/CCDC47/UBAC2/UBE4B/DERL2/AMFR/MAN1A1/SEL1L/NFE2L2	14
GO:0043149	stress fiber assembly	14/1061	109/18614	0.00357195	0.0488841	0.0412002	CD47/SLC9A1/ACTG1/TPM1/ROCK2/ARRB1/RHOC/INPP5K/WASF2/ZYX/ITGB5/MKKS/RHOA/ROCK1	14
GO:0032908	regulation of transforming growth factor beta1 production	4/1061	12/18614	0.00359227	0.0488841	0.0412002	CD2AP/ATP6AP2/LAPTM4B/THBS1	4
GO:0036295	cellular response to increased oxygen levels	4/1061	12/18614	0.00359227	0.0488841	0.0412002	ATP6V1G1/ATP6AP1/ATG7/ATP6V1A	4
GO:0060312	regulation of blood vessel remodeling	4/1061	12/18614	0.00359227	0.0488841	0.0412002	CST3/TMBIM1/TGFB1/BCR	4
GO:0071394	cellular response to testosterone stimulus	4/1061	12/18614	0.00359227	0.0488841	0.0412002	IGF1R/ROCK2/MSN/NCOA4	4
GO:1901731	positive regulation of platelet aggregation	4/1061	12/18614	0.00359227	0.0488841	0.0412002	MFSD2B/MMRN1/GP6/DMTN	4
GO:1902946	protein localization to early endosome	4/1061	12/18614	0.00359227	0.0488841	0.0412002	ROCK2/MSN/RDX/EGF	4
GO:0031252	cell leading edge	68/1089	422/19518	2.07355e-15	1.29597e-12	9.32007e-13	WASF1/WWC1/GSN/MYO5A/VEZT/TUBG1/SSX2IP/CAPZB/STX4/CDC42BPA/PDLIM7/RAB3IP/MACF1/PLEKHO1/SLC9A1/ARF4/CLIP1/CTNNA1/CD2AP/SNX1/SNX9/PACSIN2/NCKAP1/P4HB/TPM1/ABLIM3/PARVB/FER/ARF1/ATP6AP2/DUSP22/ARPC5/DBNL/CFL1/INPP5K/WIPF1/HDAC6/WASF2/TLN1/MYO1C/CYFIP1/PLEK/APP/TWF2/ARHGAP45/SH2B2/MKLN1/CORO1B/CLCN3/ITGB1/FLOT1/RHOA/AKT1/ATP6V1B2/DIAPH1/APPL2/RDX/ARHGAP18/ROCK1/WASF3/SAMSN1/ACTB/MYH9/SSH1/DGKZ/SNX5/D…	68
GO:0005765	lysosomal membrane	65/1089	415/19518	3.4945e-14	5.59379e-12	4.02282e-12	TPCN1/SORT1/CD63/VTI1B/TAB2/ABCA3/SURF4/STARD3NL/UBXN6/TMEM9/TMEM9B/AP2M1/VPS41/WDR41/ACP2/ATP6V0A1/MARCHF2/NPRL3/HPSE/SNAP29/CHMP6/KXD1/ARRB1/LAMTOR1/GNB1/SLC44A2/AP2A1/CTSA/TMEM63A/ATP6AP2/GPR137/MFSD1/CMTM6/CHMP5/AP5M1/ATP6V1G1/GNAQ/STOM/LAPTM4B/CLCN3/RILP/CDIP1/GPR137B/OSTM1/PLD3/ATP13A2/FLOT1/PSAP/TMBIM1/AP2S1/ATP6V1B2/AP3M1/ATP6V1E1/LRBA/AP1B1/CTNS/ATP6V0E1/EGF/RHEB/LAMP2/RMC1/AP3B1/SNAPIN/…	65
GO:0098852	lytic vacuole membrane	65/1089	415/19518	3.4945e-14	5.59379e-12	4.02282e-12	TPCN1/SORT1/CD63/VTI1B/TAB2/ABCA3/SURF4/STARD3NL/UBXN6/TMEM9/TMEM9B/AP2M1/VPS41/WDR41/ACP2/ATP6V0A1/MARCHF2/NPRL3/HPSE/SNAP29/CHMP6/KXD1/ARRB1/LAMTOR1/GNB1/SLC44A2/AP2A1/CTSA/TMEM63A/ATP6AP2/GPR137/MFSD1/CMTM6/CHMP5/AP5M1/ATP6V1G1/GNAQ/STOM/LAPTM4B/CLCN3/RILP/CDIP1/GPR137B/OSTM1/PLD3/ATP13A2/FLOT1/PSAP/TMBIM1/AP2S1/ATP6V1B2/AP3M1/ATP6V1E1/LRBA/AP1B1/CTNS/ATP6V0E1/EGF/RHEB/LAMP2/RMC1/AP3B1/SNAPIN/…	65
GO:0015629	actin cytoskeleton	72/1089	489/19518	3.58002e-14	5.59379e-12	4.02282e-12	WASF1/INF2/DOCK5/FHL3/SAMD14/KAT2B/GSN/MYO5A/CAPZB/CDC42BPA/SNCA/CNN2/PDLIM7/INTS6/MACF1/GAS2L1/MYL9/TPM4/CTNNA1/CD2AP/SNX9/DMTN/TPM3/ACTG1/NCKAP1/SPECC1/NEXN/DSTN/TPM1/ABLIM3/SMTN/PARVB/FER/FERMT3/PTPN12/WDR1/DAAM1/DUSP22/ARHGAP21/ARPC5/DBNL/CFL1/COTL1/WIPF1/TMOD1/WASF2/MYO1C/CAP1/TPM2/FLII/ZYX/TWF2/SEPTIN2/PRKCB/SH2B2/CORO1B/PLS3/MYL6B/BIN2/FLOT1/TMOD3/STX1A/CLIC4/SPTB/DIAPH1/RDX/VCL/ACTB/MYH9/…	72
GO:0005774	vacuolar membrane	68/1089	460/19518	1.55167e-13	1.93959e-11	1.39487e-11	TPCN1/SORT1/CD63/VTI1B/TAB2/ABCA3/SURF4/STARD3NL/UBXN6/TMEM9/TMEM9B/AP2M1/VPS41/WDR41/ACP2/ATP6V0A1/MARCHF2/NPRL3/HPSE/SNAP29/CHMP6/KXD1/ARRB1/LAMTOR1/GNB1/SLC44A2/AP2A1/CTSA/TMEM63A/ATP6AP2/GPR137/MFSD1/CMTM6/CHMP5/AP5M1/ATP6V1G1/GNAQ/STOM/LAPTM4B/CLCN3/RILP/CDIP1/GPR137B/OSTM1/PLD3/ATP13A2/FLOT1/PSAP/TMBIM1/WIPI1/AP2S1/ATP6V1B2/AP3M1/ATP6V1E1/LRBA/AP1B1/CTNS/ATP6V0E1/EGF/RHEB/LAMP2/RMC1/AP3B1/S…	68
GO:0030055	cell-substrate junction	65/1089	432/19518	2.36807e-13	2.24804e-11	1.6167e-11	MAPRE1/WASF1/BSG/FHL3/CBL/GSN/CD9/CNN2/PDLIM7/USP33/SNAP23/SLC9A1/PTPRA/TPM4/CTNNA1/CD151/ZFYVE21/PACSIN2/ACTG1/NCKAP1/P4HB/ITGA2B/NEXN/ALCAM/MSN/PARVB/ARF1/FERMT3/PTPN12/TGFB1I1/ARPC5/MAPK3/CFL1/CAPN1/YWHAE/TLN1/CYFIP1/CAP1/FLII/ZYX/CD46/ITGA2/ITGB5/CORO1B/ADAM10/ITGB1/CD99/NUMB/FLOT1/RAB10/RHOA/SENP1/TNS1/ZNF185/RDX/DCAF6/VCL/GNA12/ARL2/ACTB/MYH9/FHL1/FLNA/DNM2/CAPN2	65
GO:0005925	focal adhesion	64/1089	422/19518	2.5178e-13	2.24804e-11	1.6167e-11	MAPRE1/WASF1/BSG/FHL3/CBL/GSN/CD9/CNN2/PDLIM7/USP33/SNAP23/SLC9A1/PTPRA/TPM4/CTNNA1/CD151/ZFYVE21/PACSIN2/ACTG1/NCKAP1/P4HB/ITGA2B/NEXN/ALCAM/MSN/PARVB/ARF1/PTPN12/TGFB1I1/ARPC5/MAPK3/CFL1/CAPN1/YWHAE/TLN1/CYFIP1/CAP1/FLII/ZYX/CD46/ITGA2/ITGB5/CORO1B/ADAM10/ITGB1/CD99/NUMB/FLOT1/RAB10/RHOA/SENP1/TNS1/ZNF185/RDX/DCAF6/VCL/GNA12/ARL2/ACTB/MYH9/FHL1/FLNA/DNM2/CAPN2	64
GO:0034774	secretory granule lumen	52/1089	322/19518	4.04613e-12	3.16104e-10	2.27329e-10	A2M/VTI1B/GSN/PCYOX1L/TOLLIP/MMRN1/CNN2/SERPINB1/PYGL/CYB5R3/HPSE/LTF/FERMT3/CTSA/VWF/VCP/GTPBP2/ARPC5/DBNL/COTL1/PFKL/SERPING1/CLU/F8/CYFIP1/PROS1/SERPINI1/CAP1/APP/ARHGAP45/PYGB/GCA/GLA/BIN2/TRAPPC1/DPP7/THBS1/SPARC/DEFA3/ATG7/ROCK1/VCL/UNC13D/LGALS3BP/PSMD6/TGFB1/EGF/TUBB4B/ECM1/IMPDH1/PSMD2/GUSB	52
GO:0001726	ruffle	37/1089	181/19518	4.66133e-12	3.23703e-10	2.32794e-10	WWC1/MYO5A/PDLIM7/MACF1/PLEKHO1/ARF4/CLIP1/CD2AP/SNX9/PACSIN2/NCKAP1/TPM1/DBNL/CFL1/INPP5K/WIPF1/WASF2/TLN1/MYO1C/CYFIP1/PLEK/ARHGAP45/SH2B2/MKLN1/CLCN3/ITGB1/RHOA/ATP6V1B2/DIAPH1/APPL2/ARHGAP18/ROCK1/SAMSN1/MYH9/SNX5/DNM2/SH3BGRL3	37
GO:0060205	cytoplasmic vesicle lumen	52/1089	325/19518	5.81535e-12	3.63459e-10	2.61385e-10	A2M/VTI1B/GSN/PCYOX1L/TOLLIP/MMRN1/CNN2/SERPINB1/PYGL/CYB5R3/HPSE/LTF/FERMT3/CTSA/VWF/VCP/GTPBP2/ARPC5/DBNL/COTL1/PFKL/SERPING1/CLU/F8/CYFIP1/PROS1/SERPINI1/CAP1/APP/ARHGAP45/PYGB/GCA/GLA/BIN2/TRAPPC1/DPP7/THBS1/SPARC/DEFA3/ATG7/ROCK1/VCL/UNC13D/LGALS3BP/PSMD6/TGFB1/EGF/TUBB4B/ECM1/IMPDH1/PSMD2/GUSB	52
GO:0031983	vesicle lumen	52/1089	327/19518	7.3846e-12	4.19579e-10	3.01744e-10	A2M/VTI1B/GSN/PCYOX1L/TOLLIP/MMRN1/CNN2/SERPINB1/PYGL/CYB5R3/HPSE/LTF/FERMT3/CTSA/VWF/VCP/GTPBP2/ARPC5/DBNL/COTL1/PFKL/SERPING1/CLU/F8/CYFIP1/PROS1/SERPINI1/CAP1/APP/ARHGAP45/PYGB/GCA/GLA/BIN2/TRAPPC1/DPP7/THBS1/SPARC/DEFA3/ATG7/ROCK1/VCL/UNC13D/LGALS3BP/PSMD6/TGFB1/EGF/TUBB4B/ECM1/IMPDH1/PSMD2/GUSB	52
GO:0030667	secretory granule membrane	50/1089	319/19518	3.21201e-11	1.67292e-09	1.2031e-09	SLC30A5/BSG/CD63/CD47/ABCA3/SURF4/CD9/SNCA/DOK3/SNAP23/PECAM1/ATP6V0A1/HLA-C/MLEC/SNAP29/NBEAL2/ITGA2B/SLC18A2/LAMTOR1/SLC44A2/ABCC4/TMEM63A/RAB6A/ATP6AP2/ANO6/TSPAN14/SLC2A3/CMTM6/STXBP2/PGRMC1/CD46/LY6G6F/SELP/STOM/ADAM10/PSAP/TMBIM1/RAB10/P2RX1/RHOA/SERPINB6/DIAPH1/RAB5B/SPARC/FCGR2A/CD36/CD58/CD109/LAMP2/MCEMP1	50
GO:0031091	platelet alpha granule	24/1089	91/19518	1.05882e-10	5.09048e-09	3.66086e-09	A2M/VTI1B/CD9/PCYOX1L/MMRN1/SNCA/PECAM1/ITGA2B/FERMT3/VWF/GTPBP2/SERPING1/CLU/F8/PROS1/APP/LY6G6F/SELP/THBS1/SPARC/CD36/CD109/TGFB1/EGF	24
GO:0005769	early endosome	58/1089	423/19518	2.08218e-10	9.29546e-09	6.68491e-09	STAMBP/HTT/TPCN1/SORT1/VTI1B/PTP4A3/MYO5A/UBXN6/TMEM163/TMEM9B/TOLLIP/RAB32/SERPINB1/RNF11/VPS41/SNX19/TRAK2/SNX1/HLA-C/PACSIN2/LDLRAP1/VPS28/LTF/F2R/MLC1/HLA-G/MAPK3/DBNL/HLA-E/WASF2/CMTM6/VPS26B/APP/RAB4A/DYSF/LAPTM4B/CLCN3/VPS8/NUMB/PLD3/FLOT1/PTP4A2/WASHC3/EPS15/DERL2/AP3M1/RAB5B/INPP5B/APPL2/AP1B1/SNX3/AP3B1/MTMR2/PXK/AP3S1/BLTP3B/WASH6P/SNX5	58
GO:0005884	actin filament	24/1089	105/19518	2.51406e-09	1.04752e-07	7.53334e-08	INF2/MYO5A/PDLIM7/GAS2L1/TPM4/CD2AP/DMTN/TPM3/ACTG1/NCKAP1/SPECC1/TPM1/SMTN/DUSP22/COTL1/WIPF1/TMOD1/MYO1C/TPM2/TWF2/SH2B2/CORO1B/PLS3/DIAPH1	24
GO:0045335	phagocytic vesicle	28/1089	141/19518	3.63937e-09	1.42163e-07	1.02237e-07	GSN/STX4/RAB32/SNAP23/ATP6V0A1/HLA-C/ACTG1/LTF/HLA-G/HLA-E/STXBP2/MYO1C/VPS26B/ZYX/ITGB5/CLCN3/RILP/ANXA11/RAB11B/SYK/RAB10/INPP5B/APPL2/CD36/ATP6V0E1/SNX3/LAMP2/DNM2	28
GO:0030027	lamellipodium	34/1089	202/19518	7.28992e-09	2.68012e-07	1.92743e-07	WASF1/GSN/CAPZB/STX4/CDC42BPA/RAB3IP/SLC9A1/CTNNA1/SNX1/NCKAP1/P4HB/ABLIM3/PARVB/FER/DUSP22/ARPC5/DBNL/CFL1/WASF2/CYFIP1/APP/TWF2/CORO1B/ITGB1/FLOT1/RHOA/AKT1/RDX/ROCK1/WASF3/ACTB/SSH1/DGKZ/DNM2	34
GO:0000151	ubiquitin ligase complex	44/1089	307/19518	8.38185e-09	2.91037e-07	2.09301e-07	GID8/AMN1/DCAF5/DCAF11/ANKRD9/FBXW11/FBXO7/KLHDC3/SHARPIN/TRAF7/RNF14/CDC16/USP33/RNF11/USP47/RCHY1/MAVS/IKBKG/FBXW5/DCAF12/UBE2C/ABTB1/OS9/ANAPC5/PCGF5/DDA1/MKLN1/UBE4B/DCUN1D1/UBAC1/KLHL24/DERL2/WWP1/BRAP/CUL4B/FBH1/AMFR/DCAF6/RNF168/RBCK1/RNF40/FBXL4/SEL1L/FBXO9	44
GO:0030135	coated vesicle	43/1089	312/19518	3.96001e-08	1.30263e-06	9.36799e-07	SLC30A5/BCAP31/SORT1/VTI1B/CD9/AP2M1/VPS41/ATP6V0A1/SNX9/HLA-C/LDLRAP1/SLC18A2/AP2A1/VWF/ATP6AP2/GOLGA2/HLA-G/NRGN/DBNL/PACS1/HLA-E/F8/APP/ADAM10/SAR1A/NUMB/WIPI1/AP2S1/VAMP4/ATP6V1B2/ATP6V1E1/YIF1B/ATP6AP1/SCYL2/AP1B1/UNC13D/EGF/SNX3/AP3B1/SREBF2/ATP6V1A/DNM2/COPZ1	43
GO:0031092	platelet alpha granule membrane	9/1089	17/19518	8.20869e-08	2.56522e-06	1.8448e-06	CD9/SNCA/PECAM1/ITGA2B/LY6G6F/SELP/SPARC/CD36/CD109	9
GO:0005766	primary lysosome	27/1089	155/19518	1.22563e-07	3.4819e-06	2.50403e-06	CD63/SURF4/TOLLIP/SNAP23/CYB5R3/SNAP29/LAMTOR1/CTSA/VCP/CMTM6/STXBP2/CAP1/STOM/ARHGAP45/PYGB/GCA/ANXA11/GLA/PSAP/TRAPPC1/DPP7/DEFA3/UNC13D/TUBB4B/LAMP2/IMPDH1/GUSB	27
GO:0042582	azurophil granule	27/1089	155/19518	1.22563e-07	3.4819e-06	2.50403e-06	CD63/SURF4/TOLLIP/SNAP23/CYB5R3/SNAP29/LAMTOR1/CTSA/VCP/CMTM6/STXBP2/CAP1/STOM/ARHGAP45/PYGB/GCA/ANXA11/GLA/PSAP/TRAPPC1/DPP7/DEFA3/UNC13D/TUBB4B/LAMP2/IMPDH1/GUSB	27
GO:0101002	ficolin-1-rich granule	30/1089	185/19518	1.29747e-07	3.52574e-06	2.53556e-06	KCMF1/GSN/DOK3/PYGL/ATP6V0A1/NBEAL2/LAMTOR1/VCP/ATP6AP2/ARPC5/SLC2A3/DBNL/COTL1/PFKL/CAPN1/CST3/HBB/BIN2/RHOA/SERPINB6/DIAPH1/ATG7/VCL/CD58/PSMD6/LAMP2/IMPDH1/ASAH1/PSMD2/GUSB	30
GO:0042641	actomyosin	18/1089	76/19518	1.37213e-07	3.57324e-06	2.56973e-06	FHL3/KAT2B/CDC42BPA/CNN2/PDLIM7/GAS2L1/MYL9/TPM4/TPM3/TPM1/ABLIM3/DAAM1/ZYX/SH2B2/CORO1B/STX1A/MYH9/DBN1	18
GO:0005770	late endosome	40/1089	296/19518	1.99936e-07	4.99841e-06	3.59464e-06	HTT/CD63/VTI1B/ABCA3/MYO5A/STARD3NL/UBXN6/TMEM9/VPS41/VPS28/CHMP6/LAMTOR1/F2R/LGMN/MAPK3/HDAC6/VTA1/VPS26B/CHMP5/AP5M1/DYSF/NBR1/LAPTM4B/CLCN3/RILP/CDIP1/VPS8/PLD3/ATP13A2/PSAP/SLA2/DERL2/ATG9A/UNC13D/CTNS/LAMP2/RMC1/PXK/AP5Z1/STARD3	40
GO:0042581	specific granule	27/1089	160/19518	2.39226e-07	5.75063e-06	4.13561e-06	CD47/TOLLIP/STX4/CNN2/SNAP23/HPSE/MLEC/LTF/LAMTOR1/SLC44A2/TMEM63A/ANO6/TSPAN14/SLC2A3/CMTM6/STXBP2/CYFIP1/PGRMC1/STOM/CLCN3/ADAM10/ANXA11/TMBIM1/P2RX1/VCL/CD36/MCEMP1	27
GO:0005938	cell cortex	40/1089	302/19518	3.41831e-07	7.91275e-06	5.69052e-06	MAPRE1/GSN/CAPZB/SNCA/EXOC5/MYL9/TPM4/CLIP1/SEPTIN4/SNX9/ENO1/DMTN/GUCY1B1/DSTN/FER/WDR1/DBNL/COTL1/SEPTIN6/TMOD1/MYO1C/TBCB/CAP1/TRIP10/SEPTIN2/PRKCB/MKLN1/NDFIP1/BIN2/FLOT1/RHOA/SPTB/RDX/AGTRAP/GRK4/ACTB/MYH9/FLNA/DBN1/CAPN2	40
GO:0070820	tertiary granule	27/1089	164/19518	3.99301e-07	8.91297e-06	6.40984e-06	CD47/CNN2/DOK3/SNAP23/ATP6V0A1/NBEAL2/LTF/LAMTOR1/TMEM63A/ATP6AP2/ANO6/TSPAN14/SLC2A3/DBNL/STXBP2/CYFIP1/CST3/STOM/HBB/ADAM10/RHOA/SERPINB6/DIAPH1/CD58/LAMP2/MCEMP1/ASAH1	27
GO:0031093	platelet alpha granule lumen	16/1089	67/19518	5.99631e-07	1.29231e-05	9.29374e-06	A2M/VTI1B/PCYOX1L/MMRN1/FERMT3/VWF/GTPBP2/SERPING1/CLU/F8/PROS1/APP/THBS1/SPARC/TGFB1/EGF	16
GO:0030139	endocytic vesicle	43/1089	347/19518	7.96317e-07	1.65899e-05	1.19308e-05	GSN/CD9/STX4/RAB32/SNAP23/AP2M1/ATP6V0A1/CD2AP/HLA-C/ACTG1/LDLRAP1/LTF/AP2A1/HLA-G/HLA-E/STXBP2/MYO1C/VPS26B/ZYX/DYSF/HBB/ITGB5/CLCN3/RILP/ANXA11/RAB11B/SYK/UBC/RAB10/AP2S1/CAMK2G/VAMP4/RAB5B/INPP5B/SPARC/APPL2/CD36/ATP6V0E1/EGF/SNX3/LAMP2/UBB/DNM2	43
GO:0055037	recycling endosome	29/1089	200/19518	2.25013e-06	4.53655e-05	3.26249e-05	ABHD17A/TPCN1/VTI1B/MYO5A/TUBG1/ZDHHC2/TBC1D17/RNF11/DENND6B/HLA-C/PACSIN2/LDLRAP1/LTF/MLC1/HLA-G/HLA-E/CMTM6/APP/RAB4A/CLCN3/ITGB1/RAB11B/RAB10/ATG9A/UNC13D/TPP1/MCTP1/DYNC1I1/WASH6P	29
GO:0032587	ruffle membrane	19/1089	101/19518	2.72134e-06	5.18075e-05	3.72578e-05	WWC1/MACF1/PLEKHO1/ARF4/PACSIN2/TPM1/CFL1/INPP5K/TLN1/MYO1C/PLEK/ARHGAP45/CLCN3/ITGB1/RHOA/DIAPH1/APPL2/DNM2/SH3BGRL3	19
GO:0030133	transport vesicle	48/1089	425/19518	2.73544e-06	5.18075e-05	3.72578e-05	SLC30A5/SORT1/VTI1B/SURF4/TMEM163/SNCA/RAB3IP/SEPTIN4/ATP6V0A1/HLA-C/YIPF3/PTPRS/SLC18A2/AP2A1/RAB6A/ATP6AP2/HLA-G/NRGN/SEPTIN6/HLA-E/APP/SEPTIN2/DYSF/CLCN3/SPX/SAR1A/RAB11B/ATP13A2/RAB10/STX1A/VAMP4/ATP6V1B2/ATP6V1E1/CDK16/RAB5B/ATP6AP1/CALM3/AP1B1/UNC13D/COPS4/MCTP1/MFF/SNAPIN/MTMR2/SREBF2/AP3S1/ATP6V1A/COPZ1	48
GO:0070382	exocytic vesicle	31/1089	225/19518	3.06027e-06	5.62549e-05	4.04562e-05	VTI1B/TMEM163/SNCA/RAB3IP/SEPTIN4/ATP6V0A1/PTPRS/SLC18A2/RAB6A/ATP6AP2/SEPTIN6/APP/SEPTIN2/DYSF/CLCN3/RAB11B/RAB10/STX1A/ATP6V1B2/ATP6V1E1/CDK16/RAB5B/ATP6AP1/CALM3/UNC13D/COPS4/MCTP1/MFF/SNAPIN/MTMR2/ATP6V1A	31
GO:0030136	clathrin-coated vesicle	30/1089	215/19518	3.38408e-06	6.04301e-05	4.34588e-05	BCAP31/SORT1/CD9/AP2M1/VPS41/ATP6V0A1/SNX9/LDLRAP1/SLC18A2/AP2A1/VWF/ATP6AP2/NRGN/DBNL/ADAM10/NUMB/WIPI1/AP2S1/VAMP4/ATP6V1B2/ATP6V1E1/ATP6AP1/SCYL2/AP1B1/UNC13D/EGF/SNX3/AP3B1/ATP6V1A/DNM2	30
GO:0030863	cortical cytoskeleton	19/1089	104/19518	4.28011e-06	7.43075e-05	5.34388e-05	MAPRE1/GSN/CAPZB/TPM4/SNX9/DMTN/DSTN/WDR1/COTL1/TMOD1/CAP1/PRKCB/FLOT1/SPTB/RDX/ACTB/MYH9/DBN1/CAPN2	19
GO:0032432	actin filament bundle	16/1089	78/19518	5.14322e-06	8.62888e-05	6.20553e-05	FHL3/CNN2/PDLIM7/GAS2L1/MYL9/TPM4/TPM3/TPM1/ABLIM3/DAAM1/ZYX/SH2B2/CORO1B/PLS3/MYH9/FLNA	16
GO:0005775	vacuolar lumen	26/1089	176/19518	5.24636e-06	8.62888e-05	6.20553e-05	TOLLIP/CYB5R3/ACP2/HPSE/CTSA/VCP/LGMN/CAP1/ARHGAP45/PYGB/GCA/SMPD1/GLA/PLD3/ATP13A2/PSAP/TRAPPC1/DPP7/DEFA3/UNC13D/TPP1/TUBB4B/LAMP2/IMPDH1/ASAH1/GUSB	26
GO:0009898	cytoplasmic side of plasma membrane	24/1089	159/19518	8.21707e-06	0.000131684	9.47014e-05	AP2M1/BIRC2/G6PD/LDLRAP1/ACP1/FER/GNB1/AP2A1/GNA15/GNAQ/SYK/AP2S1/RHOA/AKT1/SPTB/GNAZ/CDK16/GNAI2/GNA12/GNAO1/GNB5/RASA3/MYH9/SNX5	24
GO:0098562	cytoplasmic side of membrane	27/1089	193/19518	9.80097e-06	0.000151369	0.000108858	AP2M1/BIRC2/G6PD/LDLRAP1/KXD1/ACP1/FER/GNB1/AP2A1/GNA15/GNAQ/CDIP1/SYK/AP2S1/RHOA/AKT1/SPTB/GNAZ/CDK16/GNAI2/GNA12/GNAO1/GNB5/RASA3/MYH9/SNAPIN/SNX5	27
GO:0035579	specific granule membrane	17/1089	91/19518	9.92982e-06	0.000151369	0.000108858	CD47/SNAP23/MLEC/LAMTOR1/SLC44A2/TMEM63A/ANO6/TSPAN14/SLC2A3/CMTM6/PGRMC1/STOM/ADAM10/TMBIM1/P2RX1/CD36/MCEMP1	17
GO:0031209	SCAR complex	6/1089	12/19518	2.05533e-05	0.000305853	0.000219957	WASF1/NCKAP1/WASF2/CYFIP1/SRA1/WASF3	6
GO:0001725	stress fiber	14/1089	69/19518	2.25639e-05	0.000316785	0.000227818	FHL3/CNN2/PDLIM7/GAS2L1/MYL9/TPM4/TPM3/TPM1/ABLIM3/DAAM1/ZYX/SH2B2/CORO1B/MYH9	14
GO:0097517	contractile actin filament bundle	14/1089	69/19518	2.25639e-05	0.000316785	0.000227818	FHL3/CNN2/PDLIM7/GAS2L1/MYL9/TPM4/TPM3/TPM1/ABLIM3/DAAM1/ZYX/SH2B2/CORO1B/MYH9	14
GO:0030670	phagocytic vesicle membrane	15/1089	78/19518	2.28085e-05	0.000316785	0.000227818	STX4/RAB32/SNAP23/ATP6V0A1/HLA-C/HLA-G/HLA-E/RILP/RAB11B/RAB10/INPP5B/APPL2/ATP6V0E1/LAMP2/DNM2	15
GO:0030119	AP-type membrane coat adaptor complex	10/1089	37/19518	2.45126e-05	0.00033221	0.000238911	AP2M1/AP2A1/AP5M1/AP2S1/AP3M1/AP1B1/AP4S1/AP3B1/AP3S1/AP5Z1	10
GO:0002102	podosome	9/1089	30/19518	2.49822e-05	0.00033221	0.000238911	DOCK5/GSN/TPM4/FERMT3/PTPN12/WDR1/DBNL/BIN2/VCL	9
GO:0030666	endocytic vesicle membrane	26/1089	196/19518	3.64224e-05	0.00047425	0.000341061	CD9/STX4/RAB32/SNAP23/AP2M1/ATP6V0A1/HLA-C/LDLRAP1/AP2A1/HLA-G/HLA-E/RILP/RAB11B/UBC/RAB10/AP2S1/CAMK2G/VAMP4/INPP5B/APPL2/CD36/ATP6V0E1/EGF/LAMP2/UBB/DNM2	26
GO:0035578	azurophil granule lumen	16/1089	91/19518	3.93674e-05	0.000502135	0.000361114	TOLLIP/CYB5R3/CTSA/VCP/CAP1/ARHGAP45/PYGB/GCA/GLA/TRAPPC1/DPP7/DEFA3/UNC13D/TUBB4B/IMPDH1/GUSB	16
GO:0008021	synaptic vesicle	27/1089	210/19518	4.53613e-05	0.000567017	0.000407774	VTI1B/TMEM163/SNCA/SEPTIN4/ATP6V0A1/PTPRS/SLC18A2/ATP6AP2/SEPTIN6/APP/SEPTIN2/DYSF/CLCN3/RAB11B/STX1A/ATP6V1B2/ATP6V1E1/CDK16/RAB5B/ATP6AP1/CALM3/COPS4/MCTP1/MFF/SNAPIN/MTMR2/ATP6V1A	27
GO:0031902	late endosome membrane	22/1089	155/19518	5.07861e-05	0.000622378	0.000447588	CD63/VTI1B/ABCA3/STARD3NL/UBXN6/TMEM9/VPS41/VPS28/CHMP6/LAMTOR1/CHMP5/AP5M1/LAPTM4B/CLCN3/RILP/CDIP1/PLD3/ATP13A2/ATG9A/LAMP2/RMC1/STARD3	22
GO:1904813	ficolin-1-rich granule lumen	19/1089	124/19518	5.66424e-05	0.000680798	0.000489601	KCMF1/GSN/PYGL/VCP/ARPC5/DBNL/COTL1/PFKL/CAPN1/CST3/HBB/BIN2/ATG7/VCL/PSMD6/IMPDH1/ASAH1/PSMD2/GUSB	19
GO:0005834	heterotrimeric G-protein complex	8/1089	26/19518	5.79814e-05	0.000683742	0.000491719	GNB1/GNA15/GNAQ/GNAZ/GNAI2/GNA12/GNAO1/GNB5	8
GO:0030662	coated vesicle membrane	26/1089	202/19518	6.11299e-05	0.000707522	0.00050882	SLC30A5/VTI1B/CD9/AP2M1/ATP6V0A1/HLA-C/LDLRAP1/SLC18A2/AP2A1/ATP6AP2/HLA-G/NRGN/DBNL/HLA-E/SAR1A/AP2S1/VAMP4/ATP6V1B2/ATP6V1E1/ATP6AP1/AP1B1/EGF/AP3B1/SREBF2/ATP6V1A/COPZ1	26
GO:0031253	cell projection membrane	38/1089	349/19518	6.48262e-05	0.000736661	0.000529776	MAPRE1/AMN1/WWC1/VEZT/STX4/SLC27A4/MACF1/PLEKHO1/ARF4/SLC6A6/DMTN/PACSIN2/NCKAP1/SNAP29/TPM1/P2RY12/MSN/BBIP1/ATP6AP2/HLA-G/CFL1/INPP5K/TLN1/MYO1C/PLEK/SEPTIN2/ADCY3/ARHGAP45/CLCN3/ITGB1/RHOA/DIAPH1/APPL2/CD36/GNA12/DHRS3/DNM2/SH3BGRL3	38
GO:0031941	filamentous actin	8/1089	27/19518	7.8384e-05	0.000859474	0.000618098	PDLIM7/CD2AP/ACTG1/NCKAP1/SPECC1/SMTN/DUSP22/MYO1C	8
GO:0033176	proton-transporting V-type ATPase complex	8/1089	27/19518	7.8384e-05	0.000859474	0.000618098	ATP6V0A1/ATP6AP2/ATP6V1G1/ATP6V1B2/ATP6V1E1/ATP6AP1/ATP6V0E1/ATP6V1A	8
GO:0008303	caspase complex	5/1089	10/19518	0.000106648	0.00114922	0.000826471	CASP9/CAPNS1/GPAA1/CAPN1/CAPN2	5
GO:0031901	early endosome membrane	24/1089	187/19518	0.000120866	0.00128036	0.000920778	TPCN1/VTI1B/UBXN6/TMEM163/TMEM9B/VPS41/SNX19/SNX1/HLA-C/HLA-G/HLA-E/CMTM6/RAB4A/CLCN3/PLD3/WASHC3/EPS15/RAB5B/INPP5B/APPL2/SNX3/MTMR2/WASH6P/SNX5	24
GO:0042470	melanosome	17/1089	112/19518	0.000154059	0.00157848	0.00113517	BSG/CD63/MYO5A/RAB32/ATP6V0A1/P4HB/CALU/YWHAE/STOM/ITGB1/ANXA11/FLOT1/ATP6V1B2/RAB5B/NAP1L1/TPP1/CTNS	17
GO:0048770	pigment granule	17/1089	112/19518	0.000154059	0.00157848	0.00113517	BSG/CD63/MYO5A/RAB32/ATP6V0A1/P4HB/CALU/YWHAE/STOM/ITGB1/ANXA11/FLOT1/ATP6V1B2/RAB5B/NAP1L1/TPP1/CTNS	17
GO:0031256	leading edge membrane	23/1089	180/19518	0.000177299	0.00178729	0.00128534	WWC1/VEZT/STX4/MACF1/PLEKHO1/ARF4/PACSIN2/NCKAP1/TPM1/ATP6AP2/CFL1/INPP5K/TLN1/MYO1C/PLEK/ARHGAP45/CLCN3/ITGB1/RHOA/DIAPH1/APPL2/DNM2/SH3BGRL3	23
GO:0031094	platelet dense tubular network	5/1089	11/19518	0.000186531	0.00185051	0.00133081	IRAG1/DMTN/ATP2A2/F2R/ATP2A3	5
GO:0098978	glutamatergic synapse	41/1089	410/19518	0.000222031	0.00216827	0.00155933	ABHD17A/SORT1/YWHAH/STX4/RNF10/AP2M1/ARF4/PLEKHA5/HOMER2/PACSIN2/DNM1/PTPRS/GUCY1B1/ABLIM3/RTN4/VCP/MAPK3/NRGN/DBNL/NAPA/DNM3/HTR2A/RGS9/PRR7/CLCN3/ADAM10/ITGB1/GSK3B/NUMB/FLOT1/STX1A/PRKAR2B/P2RX1/RHOA/AKT1/SPTB/WASF3/BCR/ACTB/DNM2/DBN1	41
GO:0030658	transport vesicle membrane	27/1089	234/19518	0.000282304	0.00271446	0.00195213	SLC30A5/VTI1B/TMEM163/SNCA/ATP6V0A1/HLA-C/PTPRS/SLC18A2/AP2A1/ATP6AP2/HLA-G/NRGN/HLA-E/DYSF/SAR1A/RAB11B/STX1A/ATP6V1B2/ATP6V1E1/RAB5B/ATP6AP1/CALM3/AP1B1/MCTP1/SNAPIN/SREBF2/ATP6V1A	27
GO:1905360	GTPase complex	8/1089	32/19518	0.00028953	0.00274176	0.00197176	GNB1/GNA15/GNAQ/GNAZ/GNAI2/GNA12/GNAO1/GNB5	8
GO:0030904	retromer complex	5/1089	12/19518	0.000305087	0.00284596	0.00204669	SNX1/VPS26B/TBC1D5/SNX3/SNX5	5
GO:0019898	extrinsic component of membrane	31/1089	288/19518	0.000360537	0.00331376	0.00238311	UBXN6/WDR45B/RNF10/AP2M1/CTNNA1/STK39/PACSIN2/MGLL/WDR45/FER/GNB1/GNA15/RGS6/COQ4/GNAQ/SYK/UBC/SLA2/WIPI1/RHOA/AKT1/ATP6V1B2/GNAZ/CDK16/GNAI2/GNA12/GNAO1/GNB5/UBB/PXK/ATP6V1A	31
GO:0005819	spindle	41/1089	421/19518	0.000384837	0.00348584	0.00250687	KATNAL1/MAPRE1/KIFAP3/KAT2B/TUBG1/LSM14A/TADA3/TMEM9/CDC16/IKBKG/CHMP6/GOLGA2/KATNB1/PSRC1/SEPTIN6/CHMP5/CEP162/APP/ANAPC5/SEPTIN2/SIRT2/ANXA11/CDC14B/RB1/NCOR1/AKT1/DIAPH1/AGBL5/EFHC1/CALM3/RMDN1/STAG2/KIF20B/ZNF207/TUBB4B/TUBG2/MYH9/DYNC1I1/NEK7/INVS/PPP2CB	41
GO:0031234	extrinsic component of cytoplasmic side of plasma membrane	13/1089	80/19518	0.000455854	0.00407013	0.00292707	FER/GNB1/GNA15/GNAQ/SYK/RHOA/AKT1/GNAZ/CDK16/GNAI2/GNA12/GNAO1/GNB5	13
GO:0101003	ficolin-1-rich granule membrane	11/1089	61/19518	0.000495183	0.004359	0.00313481	DOK3/ATP6V0A1/NBEAL2/LAMTOR1/ATP6AP2/SLC2A3/RHOA/SERPINB6/DIAPH1/CD58/LAMP2	11
GO:0043292	contractile fiber	27/1089	243/19518	0.000514422	0.00446547	0.00321138	FHL3/KAT2B/RYR2/CAPZB/PDLIM7/MYL9/TPM4/ENO1/TPM3/ACTG1/NEXN/TPM1/PARVB/ARF1/STK11/TMOD1/RTN2/TPM2/TWF2/NBR1/MYL6B/TMOD3/ANK3/CALM3/VCL/DNAJB6/FLNA	27
GO:0030117	membrane coat	14/1089	92/19518	0.000557236	0.00470639	0.00338464	AP2M1/DNM1/AP2A1/AP5M1/SAR1A/EPS15/AP2S1/AP3M1/AP1B1/AP4S1/AP3B1/AP3S1/AP5Z1/COPZ1	14
GO:0048475	coated membrane	14/1089	92/19518	0.000557236	0.00470639	0.00338464	AP2M1/DNM1/AP2A1/AP5M1/SAR1A/EPS15/AP2S1/AP3M1/AP1B1/AP4S1/AP3B1/AP3S1/AP5Z1/COPZ1	14
GO:0030665	clathrin-coated vesicle membrane	18/1089	136/19518	0.00056495	0.00470792	0.00338574	CD9/AP2M1/ATP6V0A1/LDLRAP1/SLC18A2/AP2A1/ATP6AP2/NRGN/DBNL/AP2S1/VAMP4/ATP6V1B2/ATP6V1E1/ATP6AP1/AP1B1/EGF/AP3B1/ATP6V1A	18
GO:0030672	synaptic vesicle membrane	17/1089	125/19518	0.000580259	0.00470989	0.00338716	TMEM163/SNCA/ATP6V0A1/PTPRS/SLC18A2/ATP6AP2/DYSF/RAB11B/STX1A/ATP6V1B2/ATP6V1E1/RAB5B/ATP6AP1/CALM3/MCTP1/SNAPIN/ATP6V1A	17
GO:0099501	exocytic vesicle membrane	17/1089	125/19518	0.000580259	0.00470989	0.00338716	TMEM163/SNCA/ATP6V0A1/PTPRS/SLC18A2/ATP6AP2/DYSF/RAB11B/STX1A/ATP6V1B2/ATP6V1E1/RAB5B/ATP6AP1/CALM3/MCTP1/SNAPIN/ATP6V1A	17
GO:0030016	myofibril	26/1089	233/19518	0.000606523	0.00485996	0.00349508	FHL3/KAT2B/RYR2/CAPZB/PDLIM7/MYL9/TPM4/ENO1/TPM3/ACTG1/NEXN/TPM1/PARVB/ARF1/STK11/TMOD1/RTN2/TPM2/TWF2/NBR1/TMOD3/ANK3/CALM3/VCL/DNAJB6/FLNA	26
GO:0098857	membrane microdomain	33/1089	324/19518	0.000637619	0.00493125	0.00354635	BSG/CBL/CD226/PGK1/PECAM1/SLC9A1/GP6/CTNNA1/HPSE/PACSIN2/BIRC2/ANGPT1/IGF1R/LAMTOR1/F2R/MLC1/MAPK3/HDAC6/MYO1C/HTR2A/APP/STOM/CAVIN2/ITGB1/FLOT1/PRKAR2B/P2RX1/ATP1B1/GNAI2/CD36/TPP1/LAMP2/CAPN2	33
GO:0034451	centriolar satellite	16/1089	115/19518	0.000646344	0.00493125	0.00354635	WDR13/SSX2IP/CD2AP/G6PD/CSTPP1/TMEM63A/CEP162/FLII/MDM1/DYSF/CEP20/TEX9/CENPU/FLOT1/CCDC14/PXK	16
GO:0005901	caveola	13/1089	83/19518	0.000655658	0.00493125	0.00354635	CBL/CTNNA1/PACSIN2/IGF1R/F2R/MLC1/MAPK3/HDAC6/HTR2A/CAVIN2/FLOT1/ATP1B1/CD36	13
GO:0005912	adherens junction	22/1089	185/19518	0.000662883	0.00493125	0.00354635	VEZT/SSX2IP/PDLIM7/SNAP23/CTNNA1/NEXN/PKP2/MSN/TMEM204/TLN1/ZYX/ADAM10/TSPAN33/EIF4G2/FLOT1/KLHL24/RAB10/TMOD3/RDX/VCL/ACTB/MYH9	22
GO:0005905	clathrin-coated pit	12/1089	73/19518	0.00067065	0.00493125	0.00354635	SORT1/AP2M1/SNX9/ARRB1/AP2A1/APP/DGKD/LRP10/NUMB/EPS15/AP2S1/DNM2	12
GO:0030864	cortical actin cytoskeleton	12/1089	73/19518	0.00067065	0.00493125	0.00354635	GSN/SNX9/DSTN/WDR1/COTL1/CAP1/PRKCB/FLOT1/SPTB/RDX/MYH9/CAPN2	12
GO:0070821	tertiary granule membrane	12/1089	73/19518	0.00067065	0.00493125	0.00354635	CD47/SNAP23/NBEAL2/TMEM63A/ATP6AP2/ANO6/TSPAN14/SLC2A3/STOM/ADAM10/SERPINB6/MCEMP1	12
GO:0016234	inclusion body	12/1089	74/19518	0.000760527	0.00552708	0.00397485	HTT/STRADB/FBXO7/SNCA/HDAC6/CLU/GYS1/GPX1/EPS15/SLF1/PSMC5/TDP2	12
GO:0042827	platelet dense granule	6/1089	21/19518	0.000782055	0.00561821	0.00404038	CD63/ABCC4/SELP/LGALS3BP/ECM1/LAMP2	6
GO:0098858	actin-based cell projection	25/1089	225/19518	0.000814164	0.00578241	0.00415847	AMN1/MYO5A/VEZT/SLC27A4/SLC6A6/HOMER2/ANGPT1/MSN/AP2A1/PKHD1L1/RHOC/HLA-G/MYO1C/CYFIP1/APP/TWF2/ITGB1/LOXHD1/CLIC4/ATP6V1B2/UBE2Q1/ATP6V1E1/RDX/TGFB1/ATP6V1A	25
GO:0032585	multivesicular body membrane	7/1089	29/19518	0.000871936	0.00612315	0.00440351	CD63/ABCA3/TMEM9/CHMP6/CHMP5/LAPTM4B/ATP13A2	7
GO:0005865	striated muscle thin filament	6/1089	22/19518	0.00102499	0.00711796	0.00511894	TPM4/TPM3/TPM1/TMOD1/TPM2/TMOD3	6
GO:0045121	membrane raft	32/1089	323/19518	0.00121237	0.00832673	0.00598823	BSG/CBL/CD226/PGK1/PECAM1/SLC9A1/GP6/CTNNA1/HPSE/PACSIN2/BIRC2/ANGPT1/IGF1R/LAMTOR1/F2R/MLC1/MAPK3/HDAC6/MYO1C/HTR2A/APP/STOM/CAVIN2/ITGB1/FLOT1/PRKAR2B/P2RX1/ATP1B1/GNAI2/CD36/TPP1/CAPN2	32
GO:0097197	tetraspanin-enriched microdomain	4/1089	10/19518	0.00154293	0.0104819	0.00753813	GP6/TSPAN14/ADAM10/TSPAN33	4
GO:0055038	recycling endosome membrane	14/1089	102/19518	0.00156961	0.0105415	0.00758098	ABHD17A/TPCN1/VTI1B/ZDHHC2/HLA-C/PACSIN2/HLA-G/HLA-E/CMTM6/RAB4A/RAB11B/RAB10/ATG9A/WASH6P	14
GO:0014704	intercalated disc	9/1089	50/19518	0.0016023	0.0105415	0.00758098	YWHAH/SLC9A1/CTNNA1/PKP2/ITGB1/ANK3/ATP1B1/VCL/SCN1B	9
GO:0016469	proton-transporting two-sector ATPase complex	9/1089	50/19518	0.0016023	0.0105415	0.00758098	ATP6V0A1/ATP6AP2/ATP6V1G1/DMAC2L/ATP6V1B2/ATP6V1E1/ATP6AP1/ATP6V0E1/ATP6V1A	9
GO:0019867	outer membrane	25/1089	238/19518	0.0018019	0.0117311	0.00843654	WASF1/MAOB/ATF2/DHCR7/PDE2A/RAB32/CYB5R3/MAVS/ARMCX3/SEPTIN4/NLRX1/ENO1/ACSL4/SLC44A1/ANKH/MIGA2/RAF1/ACSL1/PGRMC1/ARMCX6/UBC/MFF/CLMN/UBB/VDAC2	25
GO:0030017	sarcomere	23/1089	213/19518	0.00188321	0.0121341	0.00872631	FHL3/KAT2B/RYR2/CAPZB/PDLIM7/MYL9/TPM4/ENO1/TPM3/NEXN/TPM1/PARVB/ARF1/STK11/TMOD1/RTN2/TPM2/NBR1/TMOD3/ANK3/CALM3/DNAJB6/FLNA	23
GO:0016471	vacuolar proton-transporting V-type ATPase complex	6/1089	25/19518	0.00210769	0.0132572	0.00953405	ATP6V0A1/ATP6AP2/ATP6V1G1/ATP6V1B2/ATP6V1E1/ATP6V1A	6
GO:0030131	clathrin adaptor complex	6/1089	25/19518	0.00210769	0.0132572	0.00953405	AP2M1/AP2A1/AP2S1/AP3M1/AP1B1/AP3B1	6
GO:0031461	cullin-RING ubiquitin ligase complex	20/1089	177/19518	0.00212116	0.0132572	0.00953405	AMN1/DCAF5/DCAF11/ANKRD9/FBXW11/FBXO7/KLHDC3/CDC16/USP47/FBXW5/DCAF12/UBE2C/ANAPC5/DDA1/KLHL24/CUL4B/FBH1/DCAF6/FBXL4/FBXO9	20
GO:0005874	microtubule	41/1089	461/19518	0.00222474	0.013767	0.00990063	KATNAL1/MAPRE1/KIFAP3/FBXW11/TUBG1/MACF1/GAS2L1/CLIP1/TTLL7/DNM1/CHMP6/TPGS2/CSTPP1/GOLGA2/EFHC2/KATNB1/PSRC1/MAP1A/HDAC6/DNM3/CHMP5/TBCB/CEP162/MDM1/CEP57L1/SIRT2/DPYSL2/EFHC1/ARHGAP18/CALM3/RMDN1/KIF20B/ZNF207/KIF3C/TUBB4B/TUBG2/CFAP161/DYNC1I1/NEK7/INVS/DNM2	41
GO:0000221	vacuolar proton-transporting V-type ATPase, V1 domain	4/1089	11/19518	0.00231802	0.0140657	0.0101154	ATP6V1G1/ATP6V1B2/ATP6V1E1/ATP6V1A	4
GO:0033180	proton-transporting V-type ATPase, V1 domain	4/1089	11/19518	0.00231802	0.0140657	0.0101154	ATP6V1G1/ATP6V1B2/ATP6V1E1/ATP6V1A	4
GO:1904115	axon cytoplasm	10/1089	63/19518	0.0024126	0.0144988	0.0104269	FBXW11/ARMCX3/TRAK2/MAP1A/HDAC6/HIF1A/AP3M1/AP3B1/SNAPIN/AP3S1	10
GO:0031143	pseudopodium	5/1089	18/19518	0.00249317	0.0148403	0.0106725	MSN/ARRB1/RAF1/MAPK3/CAPN2	5
GO:0036379	myofilament	6/1089	26/19518	0.00261234	0.0154029	0.0110771	TPM4/TPM3/TPM1/TMOD1/TPM2/TMOD3	6
GO:0032154	cleavage furrow	9/1089	54/19518	0.00278661	0.0162769	0.0117057	STAMBP/RHOC/SEPTIN6/SEPTIN2/ITGB1/RHOA/RDX/MYH9/SSH1	9
GO:0043202	lysosomal lumen	13/1089	98/19518	0.00308661	0.0178623	0.0128458	ACP2/HPSE/CTSA/LGMN/SMPD1/GLA/PLD3/ATP13A2/PSAP/TPP1/LAMP2/ASAH1/GUSB	13
GO:0099522	cytosolic region	5/1089	19/19518	0.00322986	0.0185198	0.0133187	HTT/GDI1/PNKD/PRKCB/DBN1	5
GO:0080008	Cul4-RING E3 ubiquitin ligase complex	7/1089	36/19518	0.00331755	0.0188497	0.0135559	DCAF5/DCAF11/FBXW5/DCAF12/DDA1/CUL4B/DCAF6	7
GO:0031968	organelle outer membrane	24/1089	236/19518	0.00335487	0.01889	0.0135849	WASF1/MAOB/ATF2/DHCR7/PDE2A/RAB32/CYB5R3/MAVS/ARMCX3/SEPTIN4/NLRX1/ENO1/ACSL4/SLC44A1/MIGA2/RAF1/ACSL1/PGRMC1/ARMCX6/UBC/MFF/CLMN/UBB/VDAC2	24
GO:1904949	ATPase complex	17/1089	147/19518	0.00346921	0.0193594	0.0139225	ATP6V0A1/GATAD2A/PTPA/VCP/ATP6AP2/BCL7B/ATP6V1G1/CDK2AP1/DMAC2L/RB1/ATP6V1B2/ATP6V1E1/ATP6AP1/RUVBL2/ATP6V0E1/ACTB/ATP6V1A	17
GO:0042383	sarcolemma	16/1089	136/19518	0.00379481	0.020989	0.0150944	BSG/COL6A3/RYR2/SLC9A1/IGF1R/ACP1/RTN2/DYSF/ITGB1/FLOT1/ALOX12/ANK3/ATP1B1/RDX/VCL/SCN1B	16
GO:0120111	neuron projection cytoplasm	12/1089	89/19518	0.00383003	0.020998	0.0151009	WASF1/FBXW11/ARMCX3/TRAK2/MAP1A/HDAC6/CHRNA2/HIF1A/AP3M1/AP3B1/SNAPIN/AP3S1	12
GO:0005635	nuclear envelope	42/1089	490/19518	0.00386424	0.0210013	0.0151033	PLAAT1/IPO11/CETN2/CMTM3/SENP2/SORT1/SURF4/FBXW11/DHCR7/DPY19L1/PARP6/LYPLA1/TXNL4A/ENO1/HTATIP2/CHMP6/GAPDH/GRK5/RTN4/MAPK3/CHMP5/APP/SMOX/GNAQ/VRK2/KPNA4/ANXA11/PLA2G4A/CLIC1/MPL/STX1A/P2RX1/ATP2A3/SENP1/BRAP/AKIRIN1/GNAZ/GPX4/RNF6/DNAJC2/CLMN/AGFG1	42
GO:0098862	cluster of actin-based cell projections	18/1089	162/19518	0.00412617	0.0222315	0.015988	VEZT/CAPZB/SLC27A4/HOMER2/PKHD1L1/RHOC/MYO1C/FLII/TWF2/CLIC1/MKKS/LOXHD1/CD36/GNA12/ACTB/MYH9/FLNA/SNX5	18
GO:1905369	endopeptidase complex	12/1089	90/19518	0.00420054	0.0224388	0.016137	CASP9/CAPNS1/GPAA1/PSMF1/VCP/ZFAND2A/CAPN1/PSME4/PSMC5/PSMD6/PSMD2/CAPN2	12
GO:0098791	Golgi apparatus subcompartment	34/1089	378/19518	0.00424543	0.0224864	0.0161713	SLC30A5/BCAP31/SORT1/TOM1L1/STX4/RAB32/MGAT4B/SNX9/GSAP/ASAP2/GPR108/RAB6A/GOLGA2/INPP5K/UXS1/APP/ATP9B/NDST1/FUT8/LYPLA2/WIPI1/COG5/RAB10/PCSK7/VAMP4/TBC1D23/ATG9A/SGMS1/AP1B1/GALNT1/ATXN2/AP4S1/FLNA/DNM2	34
GO:0000153	cytoplasmic ubiquitin ligase complex	4/1089	13/19518	0.0045918	0.0239156	0.0171991	USP33/OS9/DERL2/SEL1L	4
GO:0099523	presynaptic cytosol	4/1089	13/19518	0.0045918	0.0239156	0.0171991	HTT/GDI1/PNKD/PRKCB	4
GO:0036019	endolysosome	6/1089	29/19518	0.00467276	0.0241361	0.0173577	TPCN1/AP2M1/AP2A1/LGMN/SMPD1/AP2S1	6
GO:0031201	SNARE complex	8/1089	48/19518	0.00471436	0.0241514	0.0173687	VTI1B/STX4/SNAP23/SNAP29/NAPA/STX18/STX1A/VAMP4	8
GO:0043209	myelin sheath	8/1089	49/19518	0.00536475	0.0272599	0.0196042	GDI1/STX4/TSPAN2/GLUL/CA13/SIRT2/ITGB1/CALM3	8
GO:0043025	neuronal cell body	42/1089	500/19518	0.00548618	0.0276521	0.0198863	RTN1/VTI1B/FBXW11/GDI1/SNCA/CCNG1/USP33/SEPTIN4/TTLL7/SLC6A6/IGF1R/PTPRS/ALCAM/STRN/KATNB1/SLC2A3/NRGN/DBNL/MAP1A/HDAC6/CYFIP1/SERPINI1/HTR2A/APP/PGRMC1/GLUL/CKB/PTPRF/SIRT2/CPNE5/ATP13A2/MPL/KLHL24/PRKAR2B/AMFR/EFHC1/GNA12/SCN1B/UBB/FLNA/KCNN3/CAPN2	42
GO:0005776	autophagosome	14/1089	117/19518	0.00561968	0.0280984	0.0202072	HTT/TBC1D17/SNAP29/CHMP6/ATP6AP2/CHMP5/NBR1/NCOA4/ATP13A2/WIPI1/TBC1D5/ATG9A/LAMP2/GABARAPL2	14
GO:0036064	ciliary basal body	18/1089	167/19518	0.00567031	0.0281175	0.0202209	MAPRE1/KIFAP3/CETN2/TUBG1/SSX2IP/IFT122/DAAM1/EFHC2/HDAC6/PPP1R32/CEP41/RILP/CEP20/MKKS/AKT1/BBOF1/TBC1D7/TBC1D7-LOC100130357	18
GO:0072686	mitotic spindle	19/1089	180/19518	0.00571347	0.0281175	0.0202209	MAPRE1/KAT2B/TUBG1/LSM14A/TADA3/TMEM9/CDC16/IKBKG/GOLGA2/SIRT2/CDC14B/NCOR1/DIAPH1/AGBL5/EFHC1/RMDN1/STAG2/KIF20B/TUBB4B	19
GO:0005902	microvillus	12/1089	94/19518	0.00597949	0.0289704	0.0208343	AMN1/SLC27A4/SLC6A6/ANGPT1/MSN/MYO1C/CLIC4/ATP6V1B2/ATP6V1E1/RDX/TGFB1/ATP6V1A	12
GO:0031970	organelle envelope lumen	12/1089	94/19518	0.00597949	0.0289704	0.0208343	PLAAT1/CYCS/NME4/APP/PRELID2/NBR1/NDUFS5/ARL2/MICU1/FBXL4/COX17/CAPN2	12
GO:0005741	mitochondrial outer membrane	21/1089	208/19518	0.00631794	0.0303747	0.0218442	WASF1/MAOB/ATF2/PDE2A/RAB32/CYB5R3/MAVS/ARMCX3/SEPTIN4/NLRX1/ACSL4/SLC44A1/MIGA2/RAF1/ACSL1/PGRMC1/ARMCX6/UBC/MFF/UBB/VDAC2	21
GO:0044291	cell-cell contact zone	10/1089	72/19518	0.00645021	0.0307739	0.0221313	YWHAH/SLC9A1/CTNNA1/PKP2/ITGB1/FLOT1/ANK3/ATP1B1/VCL/SCN1B	10
GO:0072562	blood microparticle	16/1089	144/19518	0.00660778	0.0312868	0.0225002	A2M/HBD/GSN/ACTG1/ITGA2B/MSN/SERPING1/CLU/PROS1/STOM/HBB/CLIC1/PSMC5/LGALS3BP/TGFB1/ACTB	16
GO:0000421	autophagosome membrane	8/1089	51/19518	0.00686845	0.0322766	0.0232119	SNAP29/CHMP6/ATP6AP2/CHMP5/ATP13A2/WIPI1/LAMP2/GABARAPL2	8
GO:0032153	cell division site	10/1089	73/19518	0.00711027	0.0331636	0.0238498	STAMBP/SEPTIN4/RHOC/SEPTIN6/SEPTIN2/ITGB1/RHOA/RDX/MYH9/SSH1	10
GO:0030315	T-tubule	8/1089	52/19518	0.00773006	0.0357873	0.0257367	SLC9A1/IGF1R/RTN2/DYSF/ANK3/ATP1B1/RDX/SCN1B	8
GO:0019897	extrinsic component of plasma membrane	16/1089	147/19518	0.00802023	0.0368577	0.0265065	RNF10/AP2M1/CTNNA1/FER/GNB1/GNA15/GNAQ/SYK/RHOA/AKT1/GNAZ/CDK16/GNAI2/GNA12/GNAO1/GNB5	16
GO:1905368	peptidase complex	14/1089	125/19518	0.00994814	0.0453839	0.0326382	KAT2B/CASP9/TADA3/CAPNS1/GPAA1/PSMF1/VCP/ZFAND2A/CAPN1/PSME4/PSMC5/PSMD6/PSMD2/CAPN2	14
GO:0030132	clathrin coat of coated pit	4/1089	16/19518	0.0102252	0.0463097	0.033304	AP2M1/AP2A1/EPS15/AP2S1	4
GO:0044853	plasma membrane raft	13/1089	114/19518	0.0110225	0.0495617	0.0356427	CBL/CTNNA1/PACSIN2/IGF1R/F2R/MLC1/MAPK3/HDAC6/HTR2A/CAVIN2/FLOT1/ATP1B1/CD36	13
GO:0003779	actin binding	66/1075	434/18369	7.89525e-13	7.56365e-10	6.68188e-10	WASF1/INF2/FHL3/SAMD14/YWHAH/GSN/MYO5A/CAPZB/SNCA/CNN2/PPP1R18/PDLIM7/MACF1/GAS2L1/TPM4/CTNNA1/DMTN/HOMER2/TPM3/P4HB/NEXN/DSTN/TPM1/ABLIM3/SMTN/MSN/PARVB/FER/WDR1/DAAM1/ARPC5/BCL7B/DBNL/CFL1/COTL1/MAP1A/WIPF1/TMOD1/HDAC6/WASF2/TLN1/MYO1C/CYFIP1/CAP1/TPM2/FLII/TWF2/UACA/CORO1B/PLS3/ITGB1/ITPRID2/TMOD3/SPTB/DIAPH1/TNS1/RDX/VCL/WASF3/CLMN/MYH9/SSH1/PXK/FLNA/WASH6P/DBN1	66
GO:0045296	cadherin binding	52/1075	333/18369	8.26933e-11	3.96101e-08	3.49923e-08	MAPRE1/BSG/CBL/CAPZB/HDLBP/CNN2/LRRFIP1/MACF1/CTNNA1/UNC45A/CD2AP/SNX1/PFKP/SNX9/ENO1/PACSIN2/PKP2/FER/RTN4/PTPN11/GOLGA2/DBNL/YWHAE/WASF2/TLN1/VAPB/CHMP5/CD46/TWF2/SEPTIN2/CORO1B/ITGB1/RAB11B/EIF4G2/NUMB/CLIC1/LYPLA2/PCMT1/EPS15/RAB10/TMOD3/ANK3/KTN1/RDX/ARHGAP18/VCL/LARP1/MYH9/MRE11/FLNA/SNX5/DBN1	52
GO:0051015	actin filament binding	32/1075	202/18369	2.53756e-07	8.10329e-05	7.1586e-05	SAMD14/GSN/MYO5A/CAPZB/MACF1/GAS2L1/TPM4/CTNNA1/DMTN/TPM3/NEXN/DSTN/TPM1/ABLIM3/WDR1/ARPC5/DBNL/CFL1/COTL1/TLN1/MYO1C/CYFIP1/TPM2/FLII/TWF2/CORO1B/PLS3/ITPRID2/SPTB/CLMN/MYH9/FLNA	32
GO:0080025	phosphatidylinositol-3,5-bisphosphate binding	10/1075	28/18369	2.25e-06	0.000538875	0.000476052	TPCN1/WDR45B/PLEKHA5/WDR45/MAPKAP1/SESTD1/ATP13A2/WIPI1/SNX3/SNX5	10
GO:0048156	tau protein binding	12/1075	43/18369	4.28961e-06	0.000821888	0.000726072	SNCA/ROCK2/TAOK1/SMAD2/LGMN/MAP1A/HDAC6/CLU/GSK3B/ROCK1/ACTB/PPP2CB	12
GO:0043130	ubiquitin binding	18/1075	94/18369	7.334e-06	0.00111525	0.000985231	TAB2/FBXO7/TOM1L1/SHARPIN/TOLLIP/UBXN2A/BIRC2/IKBKG/VPS28/TOM1L2/ZFAND2B/HDAC6/NBR1/SIRT2/ASCC2/AMFR/RNF168/RBCK1	18
GO:0003924	GTPase activity	40/1075	327/18369	8.19475e-06	0.00111525	0.000985231	GNL1/GSPT1/RAB32/RABL3/ARF4/SEPTIN4/DNM1/ARF1/GNB1/RALB/RAB6A/GNA15/RGS6/RHOC/GTPBP2/SEPTIN6/ARF5/DNM3/ARHGDIB/NKIRAS2/RGS9/GNAQ/SEPTIN2/RAB4A/SAR1A/RAB11B/RAB10/RHOA/GNAZ/RAB5B/SRPRA/GNAI2/GNA12/GNAO1/GNB5/ARL2/RAB6B/TUBB4B/RHEB/DNM2	40
GO:0032182	ubiquitin-like protein binding	20/1075	114/18369	9.31313e-06	0.00111525	0.000985231	TAB2/FBXO7/TOM1L1/SHARPIN/TOLLIP/UBXN2A/BIRC2/IKBKG/VPS28/HERC2/TOM1L2/ZFAND2B/HDAC6/NBR1/SIRT2/DCUN1D1/ASCC2/AMFR/RNF168/RBCK1	20
GO:0019902	phosphatase binding	26/1075	187/18369	3.56411e-05	0.00379379	0.00335151	KIFAP3/PPP1R18/SLC9A1/FER/JAK3/PTPA/STRN/MAP3K5/VCP/ANKLE2/SMG7/SMAD2/ARPP19/MAPK3/YWHAE/STAT3/PPP1R32/ANAPC5/STRN4/GRB2/PPP6R1/SYK/PPP6R3/GNA12/SNX3/AP3B1	26
GO:0044389	ubiquitin-like protein ligase binding	37/1075	320/18369	6.02291e-05	0.00562789	0.00497179	FBXO7/TOLLIP/BLZF1/TMBIM6/BAG1/SNX9/UBE2J1/IKBKG/ACTG1/HERC2/ARRB1/UBE2C/RTN4/RALB/VCP/SMAD2/HDAC6/YWHAE/CLU/HIF1A/PRR7/CKB/LAPTM4B/NLK/GSK3B/UBC/SUMO3/RB1/PRKAR2B/WBP1L/CUL4B/VCL/SLF1/RNF40/UBB/GABARAPL2/UBASH3B	37
GO:0019903	protein phosphatase binding	21/1075	140/18369	6.46209e-05	0.00562789	0.00497179	KIFAP3/SLC9A1/FER/JAK3/PTPA/STRN/MAP3K5/VCP/ANKLE2/SMG7/ARPP19/YWHAE/STAT3/ANAPC5/STRN4/GRB2/PPP6R1/PPP6R3/GNA12/SNX3/AP3B1	21
GO:0071933	Arp2/3 complex binding	6/1075	14/18369	7.91808e-05	0.00616876	0.0054496	WASF1/NCKIPSD/SNX9/WASF2/CORO1B/WASF3	6
GO:0035591	signaling adaptor activity	15/1075	83/18369	8.37097e-05	0.00616876	0.0054496	GRB10/MAVS/NCK2/HOMER2/LDLRAP1/GNB1/PTPN11/STAT3/SH2B2/GRB2/BANK1/SLA2/DOK2/SH2B3/GNB5	15
GO:0051020	GTPase binding	35/1075	304/18369	0.000102717	0.00702876	0.00620934	IPO11/WASF1/INF2/DOCK5/MYO5A/YBX3/RAB3GAP2/GDI1/USP33/EXOC5/RAB3IP/PDE6D/ENO1/NCKAP1/ROCK2/FER/TBC1D13/LAMTOR1/GNB1/DAAM1/MYO1C/CYFIP1/ARHGDIB/MAPKAP1/RABGAP1/RILP/PPP6R1/DIAPH1/AP3M1/ATP6AP1/ROCK1/UNC13D/TBC1D7/TBC1D7-LOC100130357/FLNA	35
GO:0030674	protein-macromolecule adaptor activity	39/1075	361/18369	0.000166618	0.00985126	0.00870279	GRB10/VTI1B/ANKRD9/FBXO7/KLHDC3/STX4/SNAP23/AP2M1/MAVS/GAS2L1/SLC9A1/NCK2/HOMER2/LDLRAP1/SNAP29/DCAF12/GATAD2A/GNB1/AP2A1/PTPN11/AKIRIN2/MAP1A/NAPA/STAT3/SH2B2/GRB2/BANK1/STX18/SLA2/DOK2/STX1A/AP2S1/ANK3/ATP1B1/AMFR/TCOF1/SH2B3/GNB5/MYH9	39
GO:0030159	signaling receptor complex adaptor activity	11/1075	52/18369	0.000172279	0.00985126	0.00870279	GRB10/NCK2/HOMER2/LDLRAP1/GNB1/PTPN11/SH2B2/GRB2/DOK2/SH2B3/GNB5	11
GO:0031683	G-protein beta/gamma-subunit complex binding	7/1075	22/18369	0.000180663	0.00985126	0.00870279	CETN2/GNA15/GNAQ/GNAZ/GNAI2/GNA12/GNAO1	7
GO:0031625	ubiquitin protein ligase binding	34/1075	301/18369	0.000185097	0.00985126	0.00870279	FBXO7/TOLLIP/BLZF1/TMBIM6/BAG1/SNX9/UBE2J1/IKBKG/ACTG1/HERC2/ARRB1/RTN4/RALB/VCP/SMAD2/HDAC6/YWHAE/CLU/HIF1A/CKB/LAPTM4B/NLK/GSK3B/UBC/RB1/PRKAR2B/WBP1L/CUL4B/VCL/SLF1/RNF40/UBB/GABARAPL2/UBASH3B	34
GO:0031267	small GTPase binding	31/1075	273/18369	0.000318465	0.0156622	0.0138363	IPO11/WASF1/INF2/DOCK5/MYO5A/YBX3/RAB3GAP2/GDI1/USP33/EXOC5/PDE6D/NCKAP1/ROCK2/FER/TBC1D13/DAAM1/MYO1C/CYFIP1/ARHGDIB/MAPKAP1/RABGAP1/RILP/PPP6R1/DIAPH1/AP3M1/ATP6AP1/ROCK1/UNC13D/TBC1D7/TBC1D7-LOC100130357/FLNA	31
GO:0030145	manganese ion binding	12/1075	65/18369	0.000342364	0.0156622	0.0138363	XPNPEP1/GLUL/CDIPT/PPM1N/PRIMPOL/ATP13A2/HMGCL/PEPD/GALNT1/DCP2/TDP2/MRE11	12
GO:0015631	tubulin binding	39/1075	374/18369	0.000343326	0.0156622	0.0138363	KATNAL1/MAPRE1/SETD2/HTT/CETN2/FBXW11/SNCA/MACF1/GAS2L1/VPS41/CLIP1/TTLL7/GPAA1/DNM1/GAPDH/TAOK1/GOLGA2/KATNB1/PSRC1/MAP1A/HDAC6/DNM3/VAPB/TBCB/MDM1/CEP57L1/RABGAP1/CCDC88C/AGBL5/EFHC1/RMDN1/KIF20B/ZNF207/KIF3C/DYNC1I1/GABARAPL2/WASH6P/SVBP/DNM2	39
GO:1902936	phosphatidylinositol bisphosphate binding	16/1075	107/18369	0.000479745	0.0208907	0.0184553	TPCN1/GSN/WDR45B/SLC9A1/PLEKHA5/LDLRAP1/WDR45/MAPKAP1/FLII/TWF2/LAPTM4B/SESTD1/ATP13A2/WIPI1/SNX3/SNX5	16
GO:0097001	ceramide binding	6/1075	19/18369	0.000555454	0.0231359	0.0204387	CLN8/PLTP/LAPTM4B/PLA2G4A/PSAP/VDAC2	6
GO:0042626	ATPase-coupled transmembrane transporter activity	15/1075	99/18369	0.000618122	0.0246734	0.0217969	ABCA6/ABCB10/ABCA3/ATP6V0A1/ATP2A2/ABCC4/ABCC1/ATP6V1G1/ATP13A2/ATP2A3/ATP6V1B2/ATP6V1E1/ATP1B1/ATP6V0E1/ATP6V1A	15
GO:0016405	CoA-ligase activity	7/1075	27/18369	0.000727376	0.024924	0.0220184	SLC27A4/DIP2A/ACSL4/ACSS2/ACSBG1/ACSM3/ACSL1	7
GO:0030695	GTPase regulator activity	47/1075	495/18369	0.000747436	0.024924	0.0220184	DOCK5/PCP2/GPSM3/RAB3GAP2/GDI1/NUCB1/TBC1D9B/TBC1D17/DENND6B/RAB3IP/WDR41/ARF4/PDE6D/NPRL3/ASAP2/HERC2/P2RY12/ARRB1/TBC1D13/LAMTOR1/RGS6/ARHGAP21/ARHGDIB/TBXA2R/RGS9/TBC1D1/GNAQ/ARHGAP45/RABGAP1/GRB2/CCDC88C/TBC1D5/RAP1GDS1/ARHGAP18/RASGRF2/SMAP2/GNB5/BCR/EGF/TBC1D7/TBC1D7-LOC100130357/ARHGAP10/RASA3/ARHGEF12/AGFG1/GMIP/HERC1	47
GO:0060589	nucleoside-triphosphatase regulator activity	47/1075	495/18369	0.000747436	0.024924	0.0220184	DOCK5/PCP2/GPSM3/RAB3GAP2/GDI1/NUCB1/TBC1D9B/TBC1D17/DENND6B/RAB3IP/WDR41/ARF4/PDE6D/NPRL3/ASAP2/HERC2/P2RY12/ARRB1/TBC1D13/LAMTOR1/RGS6/ARHGAP21/ARHGDIB/TBXA2R/RGS9/TBC1D1/GNAQ/ARHGAP45/RABGAP1/GRB2/CCDC88C/TBC1D5/RAP1GDS1/ARHGAP18/RASGRF2/SMAP2/GNB5/BCR/EGF/TBC1D7/TBC1D7-LOC100130357/ARHGAP10/RASA3/ARHGEF12/AGFG1/GMIP/HERC1	47
GO:0010314	phosphatidylinositol-5-phosphate binding	6/1075	20/18369	0.000754485	0.024924	0.0220184	SNX24/PLEKHA5/PLA2G4A/SESTD1/SNX3/SNX5	6
GO:0070300	phosphatidic acid binding	6/1075	20/18369	0.000754485	0.024924	0.0220184	PACSIN2/PLTP/NRGN/MAPKAP1/SESTD1/ATP13A2	6
GO:0004721	phosphoprotein phosphatase activity	21/1075	168/18369	0.000828125	0.0264448	0.0233618	DUSP3/PTP4A3/PTPRA/PTPRS/ACP1/PTPA/PTPN12/PTPN11/DUSP22/PPM1N/PTPRF/CDC14B/PTP4A2/CAMK2G/TNS1/CTDSPL/SSH1/MTMR2/PPP2CB/PPP6C/UBASH3B	21
GO:0019829	ATPase-coupled monoatomic cation transmembrane transporter activity	10/1075	53/18369	0.000880189	0.026747	0.0236288	ATP6V0A1/ATP2A2/ATP6V1G1/ATP13A2/ATP2A3/ATP6V1B2/ATP6V1E1/ATP1B1/ATP6V0E1/ATP6V1A	10
GO:0046625	sphingolipid binding	7/1075	28/18369	0.000921348	0.026747	0.0236288	CLN8/PLTP/SELP/LAPTM4B/PLA2G4A/PSAP/VDAC2	7
GO:0051721	protein phosphatase 2A binding	7/1075	28/18369	0.000921348	0.026747	0.0236288	PTPA/STRN/ANKLE2/SMG7/ARPP19/STRN4/GNA12	7
GO:0005525	GTP binding	38/1075	382/18369	0.000995936	0.028062	0.0247905	GNL1/TUBG1/GSPT1/RAB32/RABL3/ARF4/SEPTIN4/DNM1/GUCY1B1/ARF1/RALB/RAB6A/GNA15/RHOC/GTPBP2/SEPTIN6/ARF5/DNM3/NKIRAS2/GNAQ/SEPTIN2/RAB4A/SAR1A/RAB11B/RAB10/RHOA/GNAZ/RAB5B/SRPRA/GNAI2/GNA12/GNAO1/ARL2/RAB6B/TUBB4B/RHEB/TUBG2/DNM2	38
GO:0008017	microtubule binding	29/1075	268/18369	0.00106055	0.0290287	0.0256445	KATNAL1/MAPRE1/CETN2/FBXW11/MACF1/GAS2L1/VPS41/CLIP1/DNM1/GAPDH/GOLGA2/KATNB1/PSRC1/MAP1A/HDAC6/DNM3/VAPB/TBCB/MDM1/CEP57L1/CCDC88C/RMDN1/KIF20B/ZNF207/KIF3C/DYNC1I1/GABARAPL2/SVBP/DNM2	29
GO:0031593	polyubiquitin modification-dependent protein binding	10/1075	55/18369	0.00118759	0.0316032	0.0279188	TAB2/TNIP2/SHARPIN/IKBKG/VCP/ZFAND2B/HDAC6/MINDY1/EPS15/RNF168	10
GO:0044325	transmembrane transporter binding	17/1075	129/18369	0.00140075	0.036268	0.0320399	HTT/YWHAH/PACS2/AP2M1/ATP2A2/PKP2/PACS1/YWHAE/STX1A/ATP2A3/ANK3/DIAPH1/CALM3/FHL1/FLNA/PRKCSH/PDE4D	17
GO:0019001	guanyl nucleotide binding	39/1075	404/18369	0.00150338	0.0367704	0.0324837	GNL1/TUBG1/PDE2A/GSPT1/RAB32/RABL3/ARF4/SEPTIN4/DNM1/GUCY1B1/ARF1/RALB/RAB6A/GNA15/RHOC/GTPBP2/SEPTIN6/ARF5/DNM3/NKIRAS2/GNAQ/SEPTIN2/RAB4A/SAR1A/RAB11B/RAB10/RHOA/GNAZ/RAB5B/SRPRA/GNAI2/GNA12/GNAO1/ARL2/RAB6B/TUBB4B/RHEB/TUBG2/DNM2	39
GO:0032561	guanyl ribonucleotide binding	39/1075	404/18369	0.00150338	0.0367704	0.0324837	GNL1/TUBG1/PDE2A/GSPT1/RAB32/RABL3/ARF4/SEPTIN4/DNM1/GUCY1B1/ARF1/RALB/RAB6A/GNA15/RHOC/GTPBP2/SEPTIN6/ARF5/DNM3/NKIRAS2/GNAQ/SEPTIN2/RAB4A/SAR1A/RAB11B/RAB10/RHOA/GNAZ/RAB5B/SRPRA/GNAI2/GNA12/GNAO1/ARL2/RAB6B/TUBB4B/RHEB/TUBG2/DNM2	39
GO:0042578	phosphoric ester hydrolase activity	35/1075	352/18369	0.00155691	0.0367704	0.0324837	DUSP3/PLCB4/PTP4A3/PDE2A/PTPRA/PLCH1/ACP2/PTPRS/ACP1/INPP5A/PTPA/PTPN12/PTPN11/NT5M/DUSP22/INPP5K/IMPA2/PPM1N/PTPRF/SMPD1/CDC14B/PLD3/PTP4A2/CAMK2G/G6PC3/INPP5B/TNS1/CTDSPL/TDP2/SSH1/MTMR2/PPP2CB/PPP6C/UBASH3B/PDE4D	35
GO:0035091	phosphatidylinositol binding	29/1075	275/18369	0.00157935	0.0367704	0.0324837	TPCN1/GSN/TOM1L1/WDR45B/SLC9A1/SNX19/SNX24/SNX1/PLEKHA5/SNX9/GPAA1/LDLRAP1/WDR45/TOM1L2/NRGN/TLN1/MAPKAP1/FLII/TWF2/LAPTM4B/PLA2G4A/SESTD1/ATP13A2/WIPI1/AKT1/APPL2/SNX3/PXK/SNX5	29
GO:0016878	acid-thiol ligase activity	7/1075	31/18369	0.00175493	0.0367704	0.0324837	SLC27A4/DIP2A/ACSL4/ACSS2/ACSBG1/ACSM3/ACSL1	7
GO:0005543	phospholipid binding	44/1075	475/18369	0.00176648	0.0367704	0.0324837	TPCN1/CPNE2/GSN/TOM1L1/WDR45B/SNCA/SLC9A1/SNX19/SNX24/SNX1/PLEKHA5/SNX9/PACSIN2/GPAA1/LDLRAP1/WDR45/GRK5/PLTP/NME4/TOM1L2/NRGN/TLN1/MAPKAP1/FLII/TWF2/DYSF/CAVIN2/LAPTM4B/ANXA11/PLA2G4A/CPNE5/BIN2/SESTD1/ATP13A2/PSAP/WIPI1/AKT1/THBS1/APPL2/TPP1/SNX3/VDAC2/PXK/SNX5	44
GO:0004674	protein serine/threonine kinase activity	40/1075	421/18369	0.00176707	0.0367704	0.0324837	MKNK1/IRAK3/BCKDK/CDC42BPA/GRK3/MAP4K5/MAP4K2/STK39/HTATIP2/CDKL1/GRK6/ROCK2/TAOK1/GRK5/MAP3K5/STK11/RAF1/MAPK3/BMP2K/LTBP1/PRKCB/VRK2/STK40/NLK/GSK3B/ARAF/SYK/PRKCA/CDK2/CAMK2G/AKT1/CDK16/MINK1/CDK19/CCND3/ROCK1/GRK4/BCR/STK3/NEK7	40
GO:0016791	phosphatase activity	28/1075	265/18369	0.00183043	0.0367704	0.0324837	DUSP3/PTP4A3/PTPRA/ACP2/PTPRS/ACP1/INPP5A/PTPA/PTPN12/PTPN11/NT5M/DUSP22/INPP5K/IMPA2/PPM1N/PTPRF/CDC14B/PTP4A2/CAMK2G/G6PC3/INPP5B/TNS1/CTDSPL/SSH1/MTMR2/PPP2CB/PPP6C/UBASH3B	28
GO:0000014	single-stranded DNA endodeoxyribonuclease activity	4/1075	10/18369	0.00184236	0.0367704	0.0324837	ERCC1/RBBP8/XRCC1/MRE11	4
GO:0005522	profilin binding	4/1075	10/18369	0.00184236	0.0367704	0.0324837	HTT/ACTG1/WIPF1/DBN1	4
GO:0070016	armadillo repeat domain binding	4/1075	10/18369	0.00184236	0.0367704	0.0324837	CALCOCO1/STRN/CTNNBIP1/STRN4	4
GO:0005096	GTPase activator activity	29/1075	280/18369	0.00207266	0.0394763	0.0348742	DOCK5/RAB3GAP2/GDI1/TBC1D9B/TBC1D17/NPRL3/ASAP2/ARRB1/TBC1D13/RGS6/ARHGAP21/ARHGDIB/RGS9/TBC1D1/GNAQ/ARHGAP45/RABGAP1/TBC1D5/ARHGAP18/SMAP2/GNB5/BCR/TBC1D7/TBC1D7-LOC100130357/ARHGAP10/RASA3/ARHGEF12/AGFG1/GMIP	29
GO:0042625	ATPase-coupled ion transmembrane transporter activity	6/1075	24/18369	0.00214277	0.0394763	0.0348742	ATP6V0A1/ATP6V1G1/ATP6V1B2/ATP6V1E1/ATP6V0E1/ATP6V1A	6
GO:0044769	ATPase activity, coupled to transmembrane movement of ions, rotational mechanism	6/1075	24/18369	0.00214277	0.0394763	0.0348742	ATP6V0A1/ATP6V1G1/ATP6V1B2/ATP6V1E1/ATP6V0E1/ATP6V1A	6
GO:0046961	proton-transporting ATPase activity, rotational mechanism	6/1075	24/18369	0.00214277	0.0394763	0.0348742	ATP6V0A1/ATP6V1G1/ATP6V1B2/ATP6V1E1/ATP6V0E1/ATP6V1A	6
GO:0016877	ligase activity, forming carbon-sulfur bonds	8/1075	41/18369	0.00227376	0.0410992	0.0363079	SLC27A4/DIP2A/ACSL4/ACSS2/ACSBG1/ACSM3/ACSL1/ATG7	8
GO:0004725	protein tyrosine phosphatase activity	13/1075	91/18369	0.00239716	0.0425274	0.0375696	DUSP3/PTP4A3/PTPRA/PTPRS/ACP1/PTPN12/PTPN11/DUSP22/PTPRF/CDC14B/PTP4A2/SSH1/UBASH3B	13
GO:0051219	phosphoprotein binding	13/1075	92/18369	0.00264559	0.0456283	0.040309	CBL/SNCA/NCK2/LDLRAP1/PTPN11/MAPK3/YWHAE/GRB2/SYK/RB1/SAMSN1/UBASH3B/PRKCSH	13
GO:0008307	structural constituent of muscle	8/1075	42/18369	0.00266721	0.0456283	0.040309	MYL9/TPM4/NEXN/TPM1/SMTN/TPM2/MYL6B/MYOM2	8
GO:0005536	glucose binding	4/1075	11/18369	0.00276173	0.0464164	0.0410052	PYGL/G6PD/SLC2A3/GYS1	4
